# Supplementary material for: Defying the oxidative-addition prerequisite in cross-coupling through artful single-atom catalysts
Source: Research Square preprint supplement (doi:10.21203/rs.3.rs-5074002/v1), 2025-03-25
Supplement: Supplementary file 1 [file c08ed99e76df1c4fc11114d6.pdf]

**Defying the oxidative-addition prerequisite in cross-coupling through artful single-atom catalysts**

*Jiwei Shi<sup>1,2,3,12</sup>, Gang Wang<sup>4,12</sup>, Duanshuai Tian<sup>1,12</sup>, Xiao Hai<sup>5\*</sup>, Rongwei Meng<sup>1,2,3,12</sup>, Yifan Xu<sup>6</sup>, Yu Teng<sup>1,2</sup>, Lu Ma<sup>7</sup>, Shibo Xi<sup>8</sup>, Youqing Yang<sup>1</sup>, Xin Zhou<sup>1</sup>, Xingjie Fu<sup>1,2,3</sup>, Hengyu Li<sup>1</sup>, Qilong Cai<sup>1</sup>, Peng He<sup>1</sup>, Huihui Lin<sup>1,8</sup>, Jinxing Chen<sup>1</sup>, Jiali Li<sup>1</sup>, Jinghan Li<sup>1</sup>, Qian He<sup>9</sup>, Qian-Hong Yang<sup>2,3</sup>, Jun Li<sup>4,10</sup>, Dongshuang Wu<sup>6\*</sup>, Yang-Gang Wang<sup>4\*</sup>, Jie Wu<sup>1\*</sup> and Jiong Lu<sup>1,11\*</sup>*

<sup>1</sup>Department of Chemistry, National University of Singapore, 3 Science Drive 3, Singapore 117543, Singapore.

<sup>2</sup>Joint School of National University of Singapore and Tianjin University, International Campus of Tianjin University, Binhai New City, Fuzhou 350207, China.

<sup>3</sup>Nanoyang Group, Tianjin Key Laboratory of Advanced Carbon and Electrochemical Energy Storage, School of Chemical Engineering and Technology, National Industry-Education Integration Platform of Energy Storage, and Collaborative Innovation Center of Chemical Science and Engineering (Tianjin), Tianjin University, Tianjin, 300072, China.

<sup>4</sup>Department of Chemistry and Guangdong Provincial Key Laboratory of Catalysis, Southern University of Science and Technology, Shenzhen 518055, Guangdong, China.

<sup>5</sup>School of Materials Science and Engineering, Peking University, Beijing, P.R. China.

<sup>6</sup>School of Materials and Engineering, Nanyang Technological University, Singapore, 639798 Singapore.

<sup>7</sup>National Synchrotron Light Source II Brookhaven National Lab Upton, NY 11973, USA.

<sup>8</sup>Institute of Sustainability for Chemicals, Energy and Environment (ISCE2), Agency for Science, Technology and Research (A\*STAR), 1 Pesek Road Jurong Island, Singapore 627833, Republic of Singapore.

<sup>9</sup>Department of Material Science and Engineering, College of Design and Engineering,  
National University of Singapore, 9 Engineering Drive 1, EA #03-09, 117575, Singapore.

<sup>10</sup>Department of Chemistry and Engineering Research Center of Advanced Rare-Earth  
Materials of Ministry of Education, Tsinghua University, Beijing, China.

<sup>11</sup>National University of Singapore (Suzhou) Research Institute, No. 377 Linqun Street,  
215123 Suzhou, Jiangsu, China.

<sup>12</sup>These authors contributed equally: Jiwei Shi, Gang Wang, Duanshuai Tian, Rongwei Meng

\*Corresponding author. Email: xiaohai@pku.edu.cn; dongshuang.wu@ntu.edu.sg;  
wangyg@sustech.edu.cn; chmjie@nus.edu.sg; chmluj@nus.edu.sg

|    |                            |
|----|----------------------------|
| 35 | <b>Table of Contents</b>   |
| 36 | Supplementary Figures 1-29 |
| 37 | Supplementary Tables 1-4   |
| 38 | NMR data                   |
| 39 |                            |

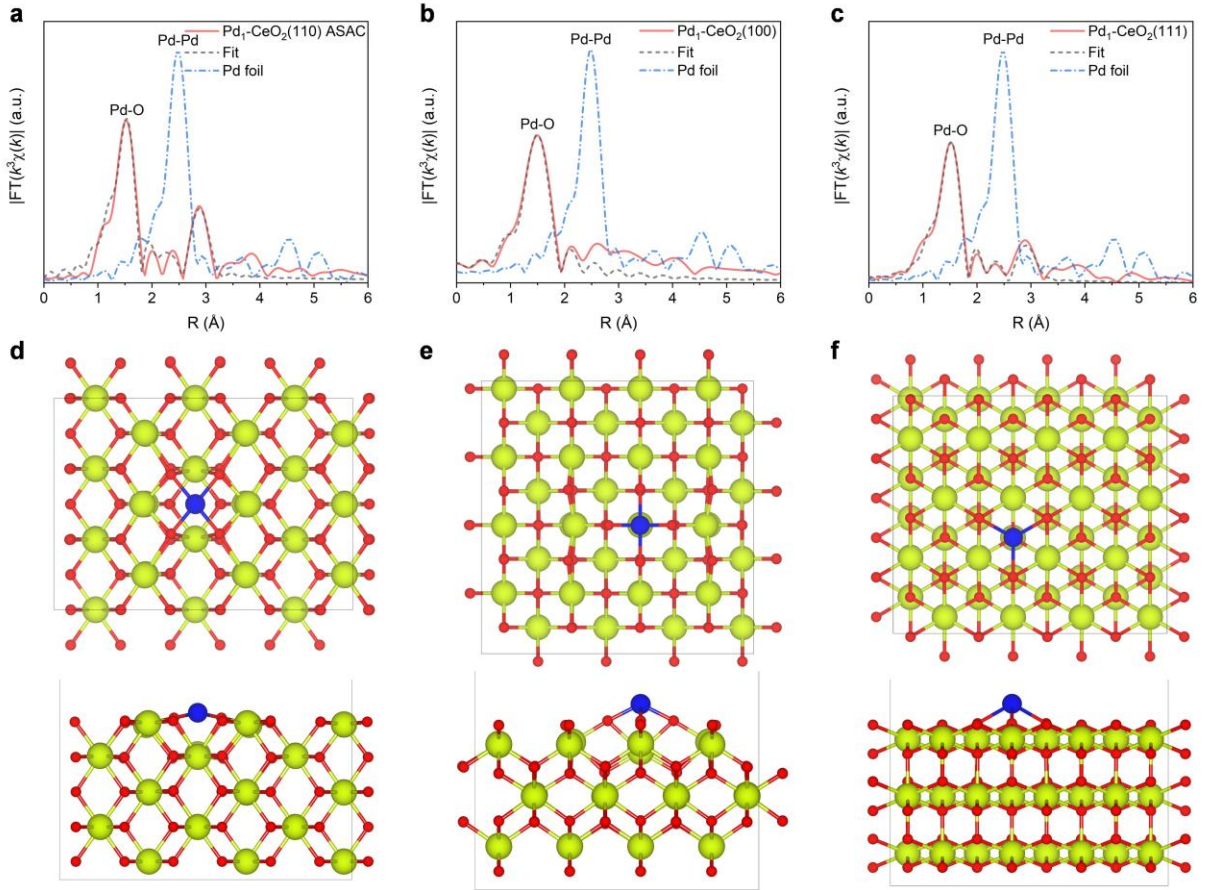

**Supplementary Fig. 1 | The experimental and modelled structures of Pd single atoms on facet-dependent CeO<sub>2</sub>.** Fourier-transformed EXAFS spectra of Pd<sub>1</sub>-CeO<sub>2</sub>(110) ASAC (a), Pd<sub>1</sub>-CeO<sub>2</sub>(100) (b), and Pd<sub>1</sub>-CeO<sub>2</sub>(111) (c). Top views and side views of Pd SACs on CeO<sub>2</sub> with different crystal planes: Pd<sub>1</sub>-CeO<sub>2</sub>(110) ASAC (d), Pd<sub>1</sub>-CeO<sub>2</sub>(100) (e), Pd<sub>1</sub>-CeO<sub>2</sub>(111) (f). The red, yellow, and blue spheres represent oxygen, cerium, and palladium, respectively.



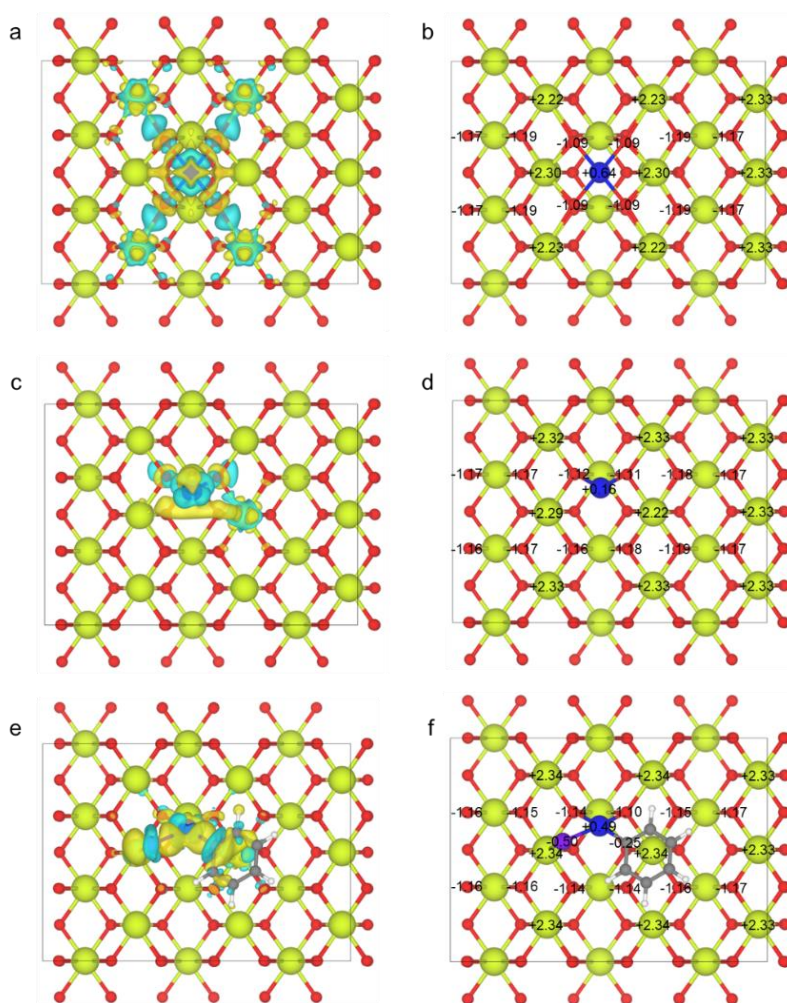

**Supplementary Fig. 2** | Charge density differences of Pd<sub>1</sub> ASACs catalyst. The white, grey, purple, red, yellow, and blue spheres represent hydrogen, carbon, bromine, oxygen, cerium, and palladium atoms, respectively.

The Pd in the initially four-coordinated Pd<sub>1</sub> ASACs catalyst is in a high-valence oxidized state, with electrons predominantly transferred to the Ce and O atoms in the Pd-O-Ce linkage (**Supplementary Fig. 2a, b**). During the reaction, the Pd-O bond is cleaved, forming a bicoordinated structure, and the Pd valence state is reduced from +0.64 to +0.16 as electrons transfer back from the Ce and O atoms to the Pd atom (**Supplementary Fig. 2c, d**). Following oxidative addition, the dissociation of bromobenzene results in the bromide ion and phenyl ring gaining 0.5 and 0.25 electrons, respectively, leading to Pd oxidation from +0.16 to +0.49. Concurrently, additional electrons are transferred from the Ce-O-Pd linkage to the Pd atom (**Supplementary Fig. 2e, f**). Thus, the continuous electron transfer between the Pd atom and the O and Ce atoms in the Pd-O-Ce bond ensures the stabilization of the Pd valence state throughout the reaction.

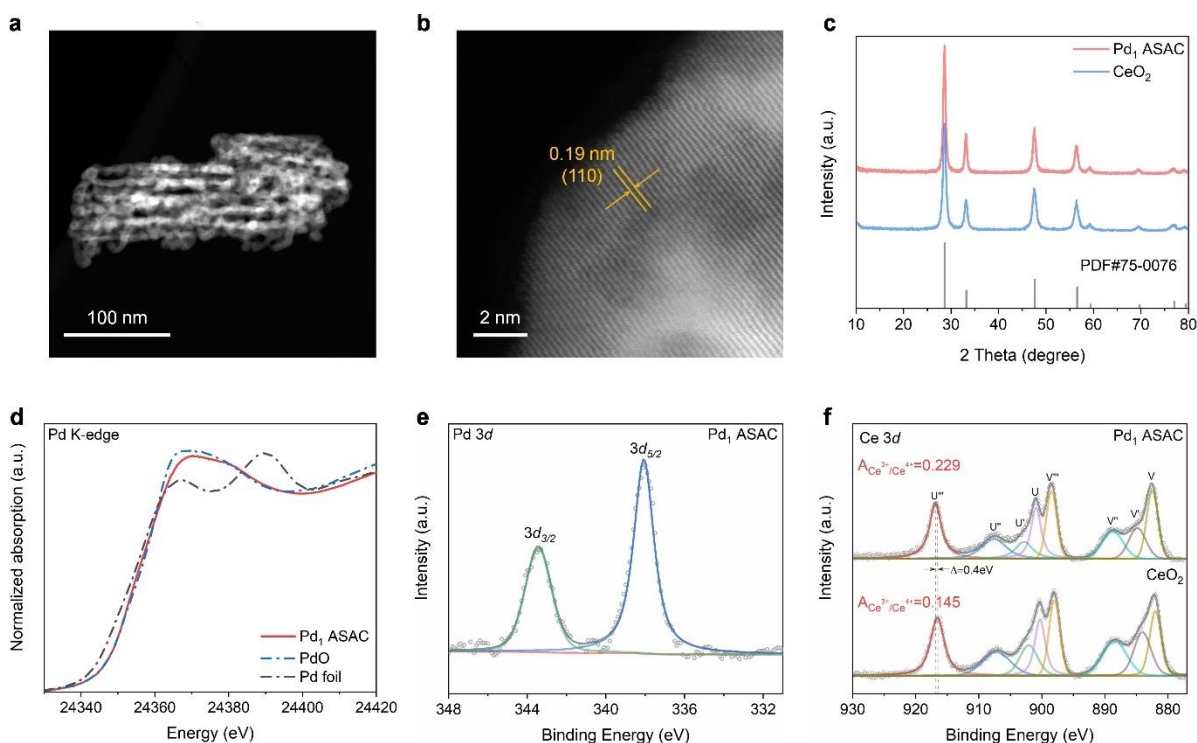

**Supplementary Fig. 3 | Characterization of Pd<sub>1</sub> ASAC.** **a**, TEM image of Pd<sub>1</sub> ASAC. **b**, Atomic-resolution ADF-STEM image of Pd<sub>1</sub> ASAC. **c**, XRD patterns of Pd<sub>1</sub> ASAC. **d**, Pd K-edge XANES spectra of Pd<sub>1</sub> ASAC and references (Pd foil and PdO). **e**, Pd 3d XPS spectra of Pd<sub>1</sub> ASAC. **f**, Ce 3d XPS spectra of Pd<sub>1</sub> ASAC and CeO<sub>2</sub>. The peaks V' and U' correspond to the signals of Ce<sup>3+</sup> species, and the others are assigned to the Ce<sup>4+</sup> species.

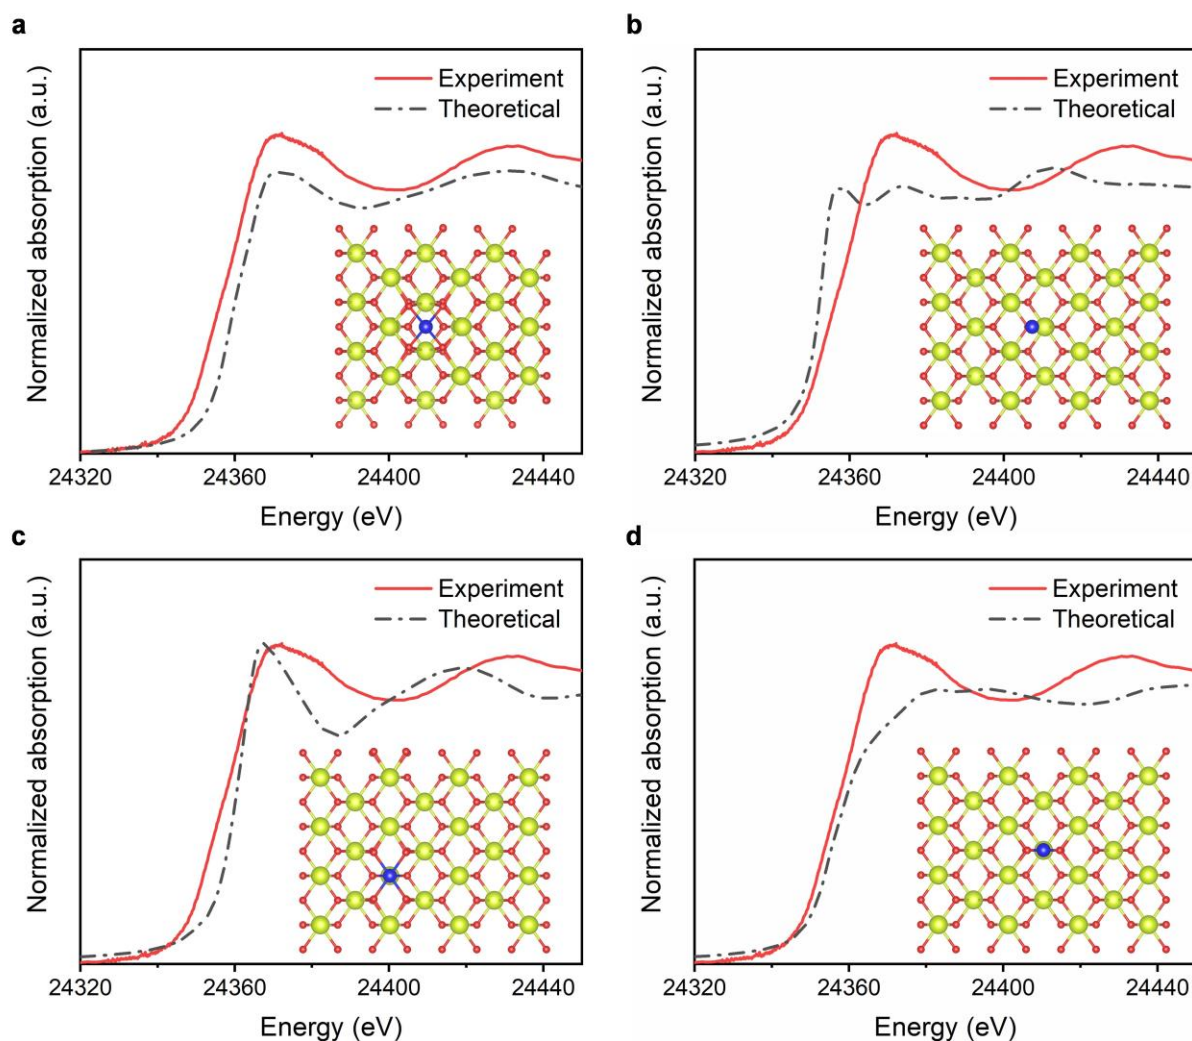

**Supplementary Fig. 4 | Comparison of the experimental and modelled Pd K-edge XANES spectra.**

**a**, Pd single-atom is anchored on the  $\text{CeO}_2(110)$  facet in a 4-coordinated manner with the surface oxygen atoms. **b**, Pd single-atom is anchored on the oxygen vacancy on the  $\text{CeO}_2(110)$  facet. **c**, Pd single-atom is anchored on the Ce vacancy on the  $\text{CeO}_2(110)$  facet. **d**, Pd single-atom is anchored on the  $\text{CeO}_2(110)$  facet in a 2-coordinated manner with the surface oxygen atoms. The corresponding DFT-modelled atomic structures are shown in the insets. The red, yellow, and blue spheres represent oxygen, cerium, and palladium, respectively.

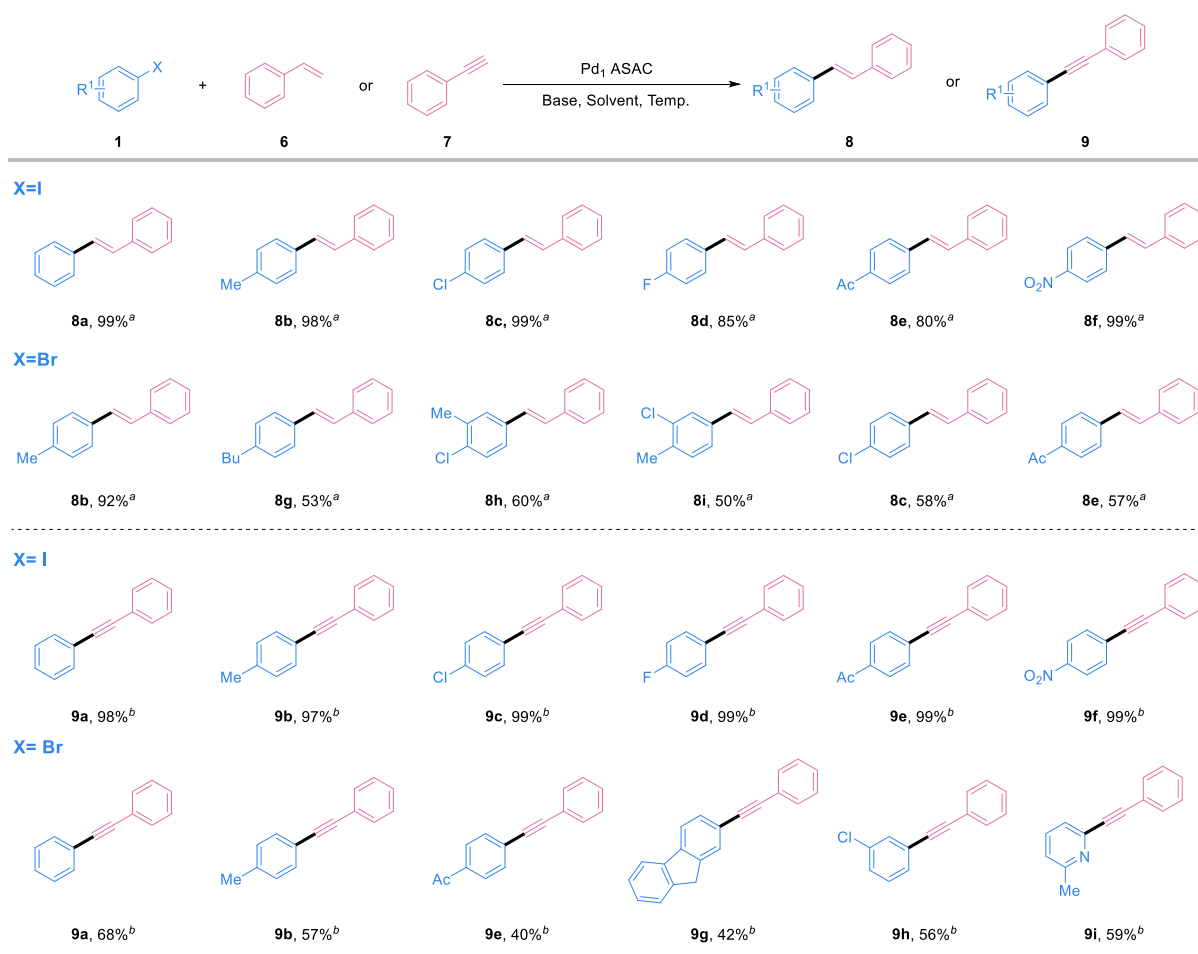

**Supplementary Fig. 5 | Substrate scope of Pd<sub>1</sub> ASAC catalyzed Heck and Sonogashira cross-coupling reactions.**

Conditions: a: **1** (0.5 mmol), **6** (1 mmol), Pd<sub>1</sub> ASAC (5 mg, 0.35 mol%), K<sub>2</sub>CO<sub>3</sub> (1.5 mmol), EtOH/H<sub>2</sub>O (2 mL: 2 mL), 100 °C, 10 h, isolated yield. b: **1** (0.5 mmol), **7** (0.75 mmol), Pd<sub>1</sub> ASAC (5 mg, 0.35 mol%), K<sub>2</sub>CO<sub>3</sub> (3 mmol), EtOH/H<sub>2</sub>O (3.5 mL: 0.5 mL), 100 °C, 10 h, isolated yield.

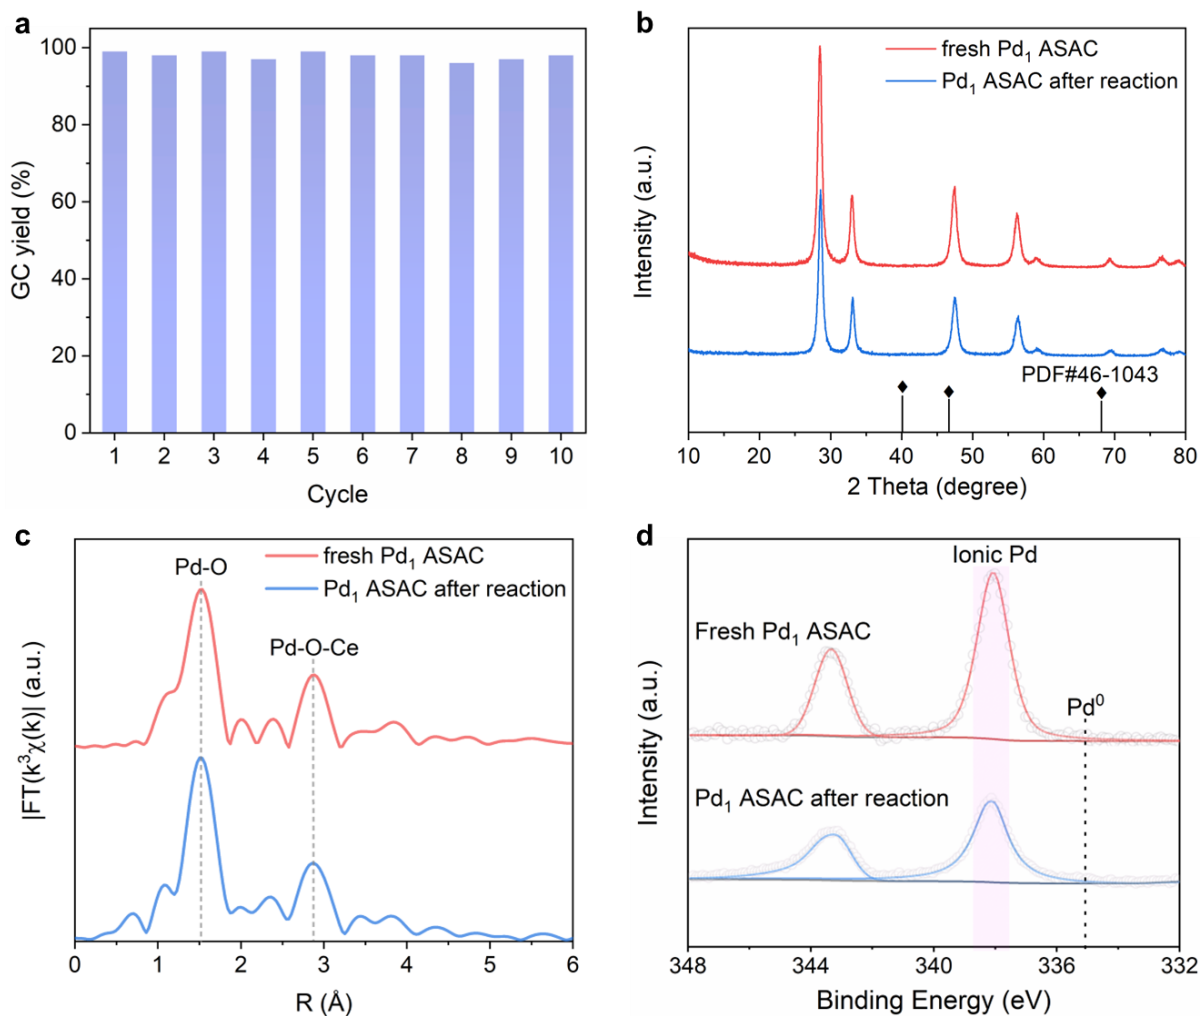

**Supplementary Fig. 6 | Stability of Pd<sub>1</sub> ASAC in Suzuki cross-coupling.** **a**, Cycling test for the Suzuki cross-coupling reaction using 4-bromotoluene and phenylboronic acid over Pd<sub>1</sub> ASAC. **b**, XRD patterns, **c**, Fourier transformed EXAFS spectra and **d**, XPS spectra of the fresh Pd<sub>1</sub> ASAC and the Pd<sub>1</sub> ASAC recovered after 10 reaction cycles.

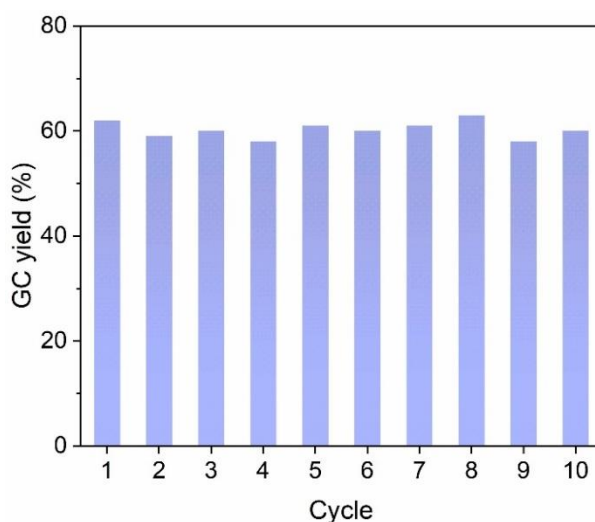

**Supplementary Fig. 7** | Cycling test for the Suzuki cross-coupling reaction using 4-bromotoluene and phenylboronic acid over Pd1 ASAC under low-conversion conditions.

Reaction conditions: 4-Bromotoluene (5 mmol), phenylboronic acid (6 mmol),  $K_2CO_3$  (15 mmol), catalyst, EtOH/ $H_2O$  (20 mL/20 mL) were sequentially added to the round-bottomed flask. The flask was heated and stirred in a 100 °C oil bath for 10 min. The products were extracted with DCM, and the yield was calculated by GC analysis. The catalyst was isolated by centrifugation, washed with EtOH/ $H_2O$ , and dried at 80 °C overnight for the next cycle. To avoid the decrease in efficiency caused by the loss of catalyst during operation, it is necessary to keep the dosage ratio of catalyst, substrate, solvent, and base constant in each cycle.



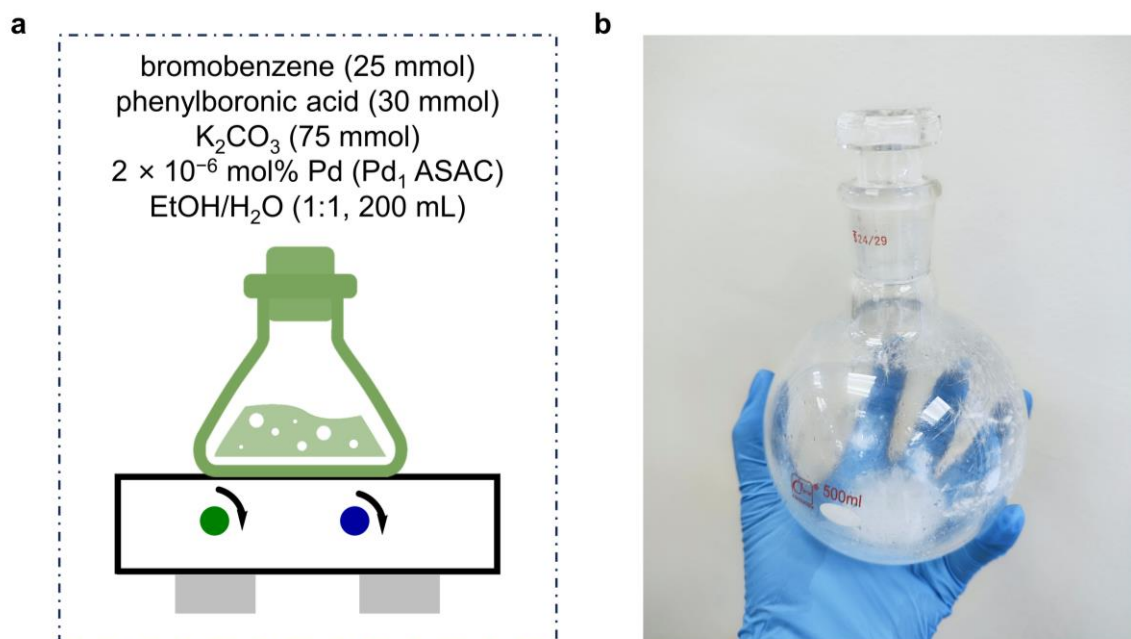

**Supplementary Fig. 8** | Turnover number (TON) of  $\text{Pd}_I$  ASAC in cross-coupling. **a**, Specific conditions of the TON test experiment. **b**, Photograph of the experimental product biphenyl.  $\text{TON} = \text{mole of converted aryl halides/mole of Pd catalyst}$

Experimental procedure is shown in Supplementary Fig. 8a : Bromobenzene (25 mmol), phenylboronic acid (30 mmol),  $\text{K}_2\text{CO}_3$  (75 mmol),  $\text{Pd}_I$  ASAC ( $2 \times 10^{-6}$  mol%, according to Pd), ethanol (100 mL), and  $\text{H}_2\text{O}$  (100 mL) were sequentially added to the flask. The flask was placed in an oil bath preheated to 80 °C, and stirring in an ambient atmosphere, yielding biphenyl (Supplementary Fig. 8b) in approximately 90% yield.

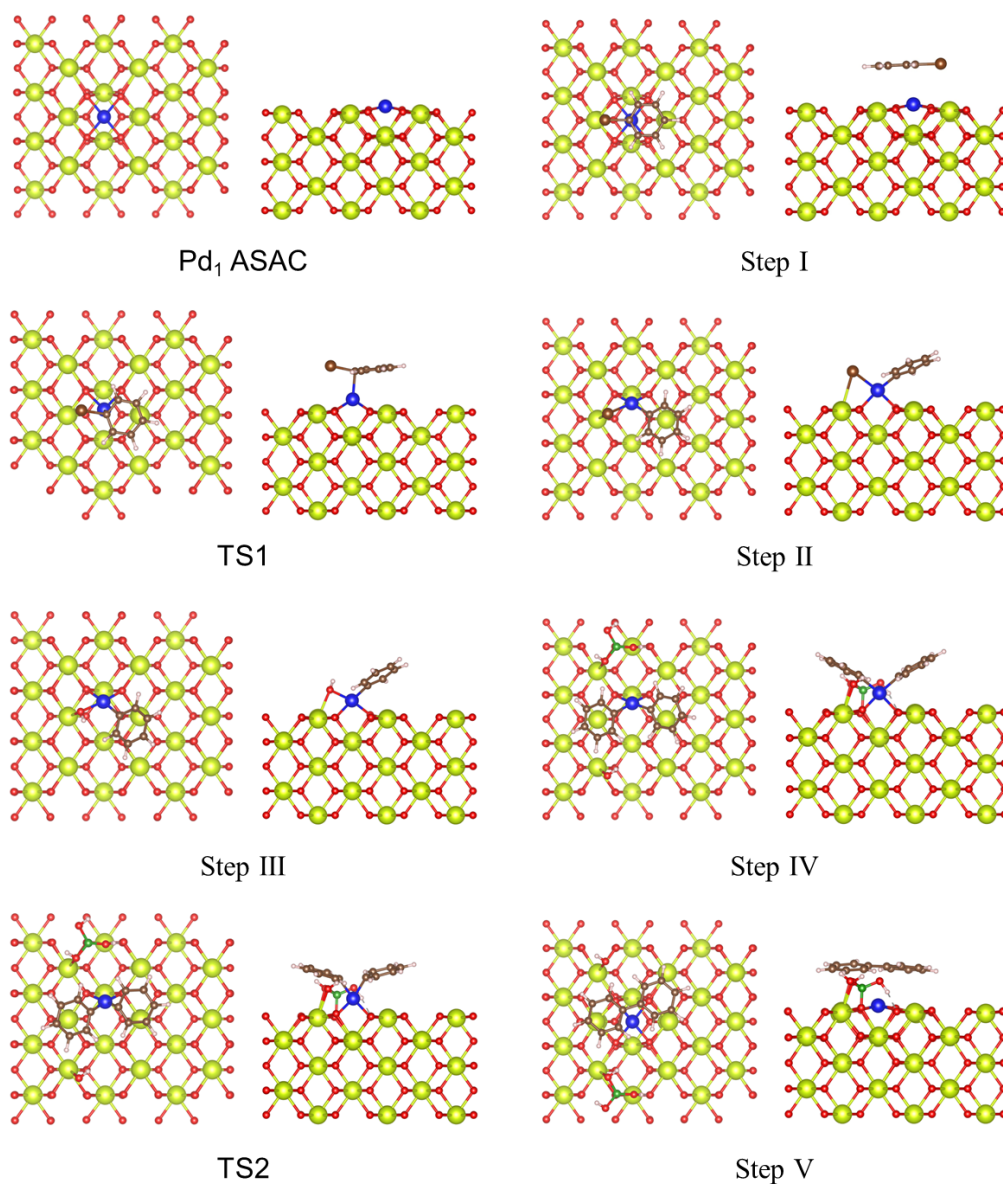

**Supplementary Fig. 9** | Atomic structure of Pd<sub>1</sub> ASAC calculated by DFT. Top and side views of the optimized structure of Pd<sub>1</sub> ASAC model in all reaction steps.



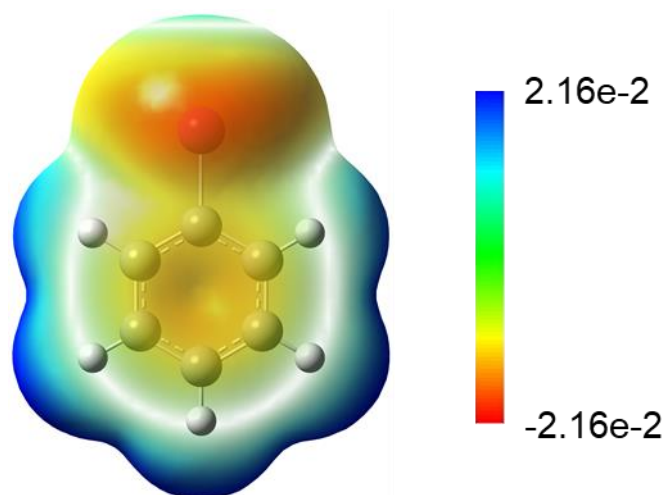

**Supplementary Fig. 10** | Electrostatic potential diagram of bromobenzene.

According to the electrostatic potential diagram of bromobenzene, it can be seen that the charges of the molecule tend to gather around the Br atom. As a result, the Br ion after bromobenzene dissociation is adsorbed on the electrophilic Ce site, and the phenyl group is adsorbed on the nucleophilic Pd site.

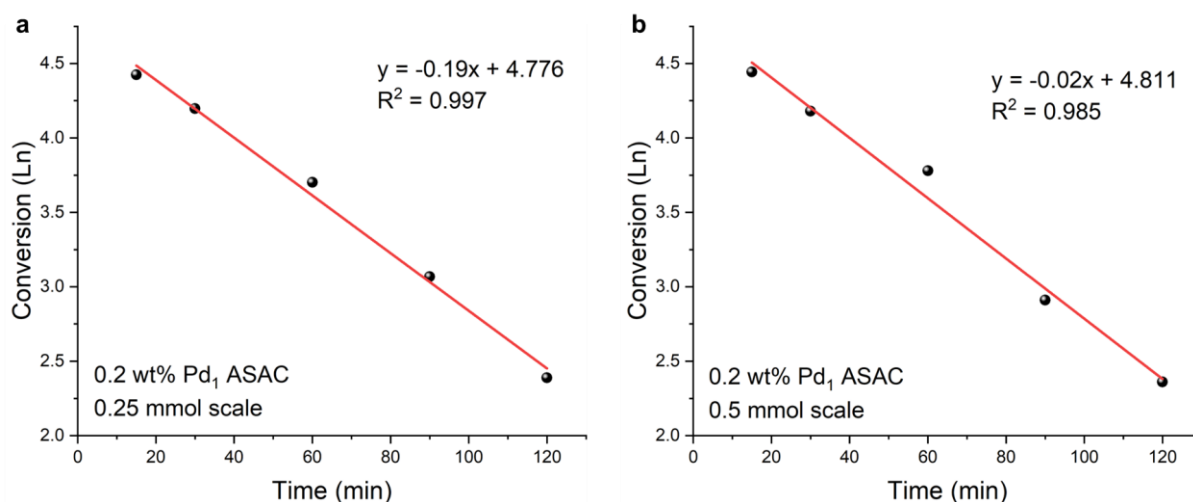

**Supplementary Fig. 11** | Kinetic studies of Pd<sub>1</sub> ASAC catalysed Suzuki cross-coupling. The plots of the natural logarithm of the concentration of aryl halide versus time: initial concentration of bromobenzene  $C_0 = 0.25$  M (**a**),  $C_0 = 0.5$  M (**b**). All reactions were conducted with 0.1 mol% Pd.

Experimental procedure: In a capped reaction tube, sequentially add 0.25 mmol ( $C_0 = 0.25$  M) or 0.5 mmol ( $C_0 = 0.5$  M) of bromobenzene, 0.6 mmol of phenylboronic acid, 1.5 mmol of K<sub>2</sub>CO<sub>3</sub>, Pd<sub>1</sub> ASAC (0.1 mol% Pd, according to Pd), 2 mL of ethanol, 2 mL of H<sub>2</sub>O, and 0.5 mmol of decane (as an internal standard for GC analysis). Place the reaction tube in an oil bath at 25 °C and stir under ambient atmosphere for the desired time (10-120 min). After the reaction, remove the cap and transfer a portion of the solution into a vial. Extract with DCM and analyze the conversion of reactants via gas chromatography. Under optimized reaction conditions, the natural logarithm of the bromobenzene concentration versus time plot is linear, indicating a first-order reaction with respect to the aryl halide. This suggests that the aryl halide is involved in the rate-determining step, consistent with DFT studies.

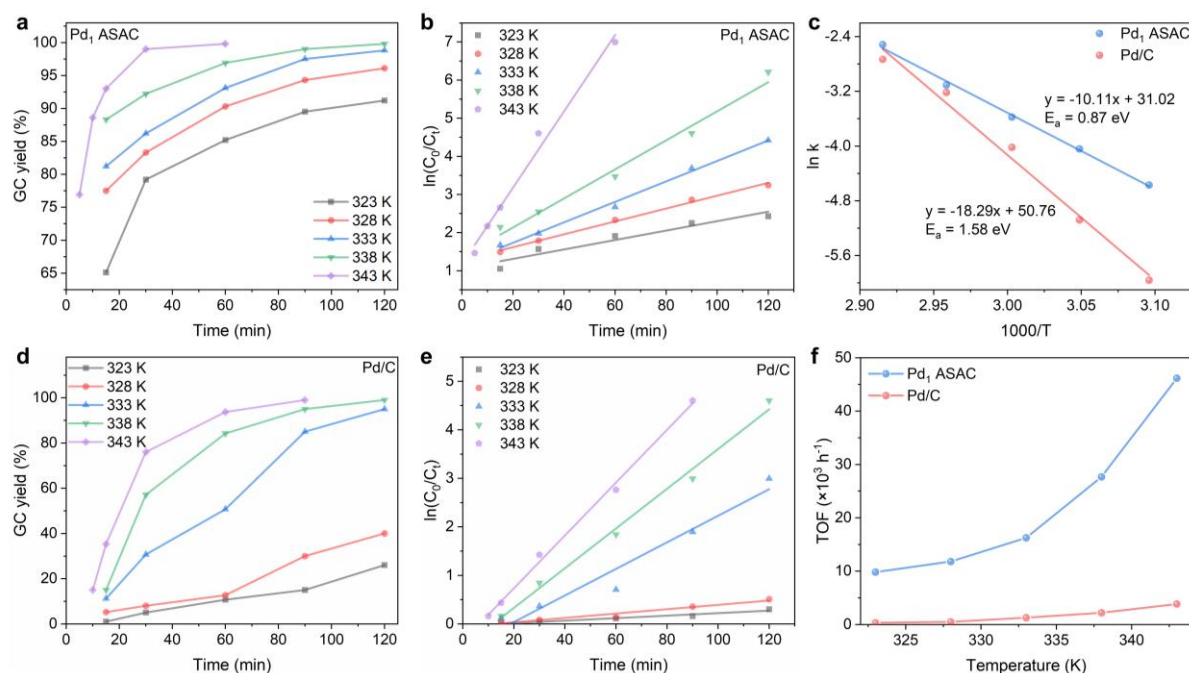

**Supplementary Fig. 12** | Catalytic performance for the Suzuki reaction of bromobenzene and phenylboronic acid. Time-dependent yield of biphenyl over Pd<sub>1</sub> ASAC (a) and Pd/C (d). The corresponding  $\ln(C_0/C_t)$ -time curves for Suzuki coupling reactions over Pd<sub>1</sub> ASAC (b) and Pd/C (e). c, Arrhenius plots of the reaction over Pd<sub>1</sub> ASAC and commercial Pd/C. f, A TOF comparison of Pd<sub>1</sub> ASAC and commercial Pd/C.

To further study the reaction kinetics of Pd<sub>1</sub> ASAC, we investigated the coupling reaction of bromobenzene and phenylboronic acid at different temperatures (323, 328, 333, 338, and 343 K) (Supplementary Fig. 12a) and compared them with commercial Pd/C (Supplementary Fig. 12d). The relationship between  $\ln(C_0/C_t)$  and time is consistent with first-order reaction kinetics (Supplementary Fig. 12b and e). The rate constant ( $k$ ) of the reaction can be calculated from the slope of the  $\ln(C_0/C_t)$ -time curve, and then the apparent activation energy can be calculated by plotting  $\ln k$  as a function of  $1000/T$  in an Arrhenius plot (Supplementary Fig. 12c). The results demonstrate that the activation energy of Pd<sub>1</sub> ASAC-catalyzed reaction is much lower than that of commercial Pd/C. Notably, Pd<sub>1</sub> ASAC is able to exhibit a significant turnover frequency (TOF) of 46,149 h<sup>-1</sup> at 343 K (Supplementary Fig. 12f), outperforming all listed catalysts by about an order of magnitude or more in the Suzuki cross-coupling reactions (Supplementary Table 3).

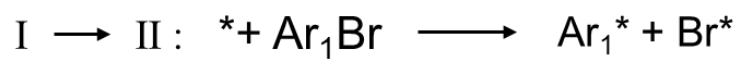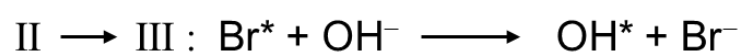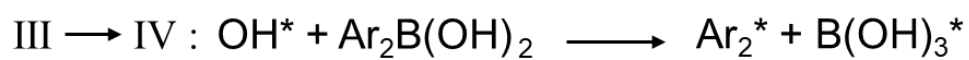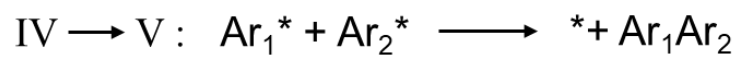

153

154 **Supplementary Fig. 13** | The chemical reaction equation of the entire reaction process.

155

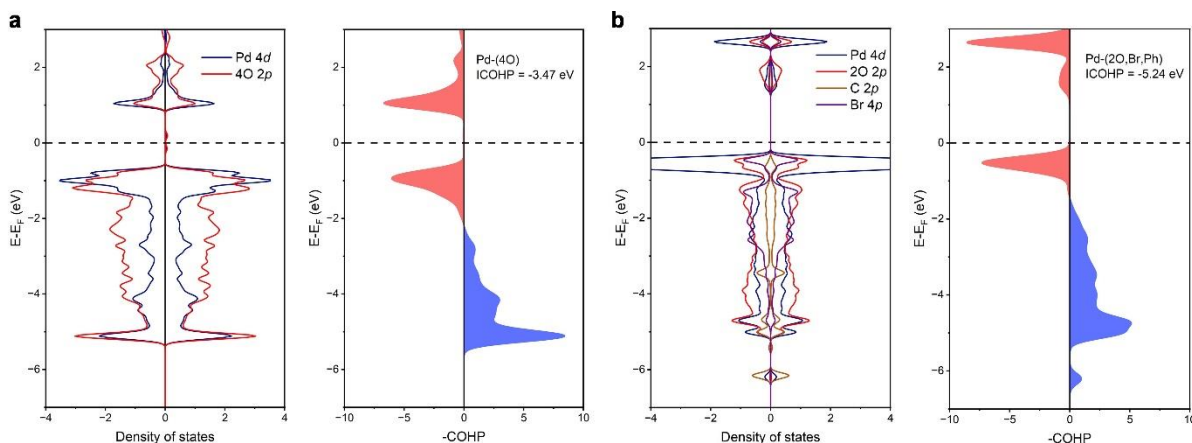

**Supplementary Fig. 14 | Electronic structure of Pd<sub>1</sub> ASAC with different coordination configurations.** **a**, DOS and ICOHP of the initial Pd-(4O) coordination structure. **b**, DOS and ICOHP of the Pd-(2O, Br, Ph) coordination structure after oxidative addition. The square-planar coordinated Pd-O bonds have obvious occupation of the antibonding orbital near  $E_F$ , while the occupation of the antibonding orbital near  $E_F$  is significantly weakened in the new tetra-coordinated structure formed by the dissociation of bromobenzene. The calculated ICOHP also confirms that Pd center has stronger bond interaction after bromobenzene dissociation ( $-5.24$  eV vs.  $-3.47$  eV), which is believed to be the driving force for the opening of Pd-O bonds.

The Pd  $d$ -orbital center of the four-coordinated PdO<sub>4</sub> motif lies further below  $E_F$  and once two Pd-O bonds are opened to form new four-coordinated structures, the Pd  $d$ -orbital centers shift significantly closer to  $E_F$ . Therefore, the Pd-adsorbate interactions are enhanced and show better catalytic activity. As a result, the Pd<sub>1</sub> ASAC can adaptively regulate the Pd electronic structure to facilitate catalysis through dynamic coordination configuration tuning during the reaction. The  $5d$ -orbitals of adjacent Ce revealed a slight decrease in the integrated occupied state below  $E_F$  and a gradual increase in empty states, with these empty states shifting toward  $E_F$ . All these observations indicate the accumulation of positive charge over Ce as the reaction proceeds.

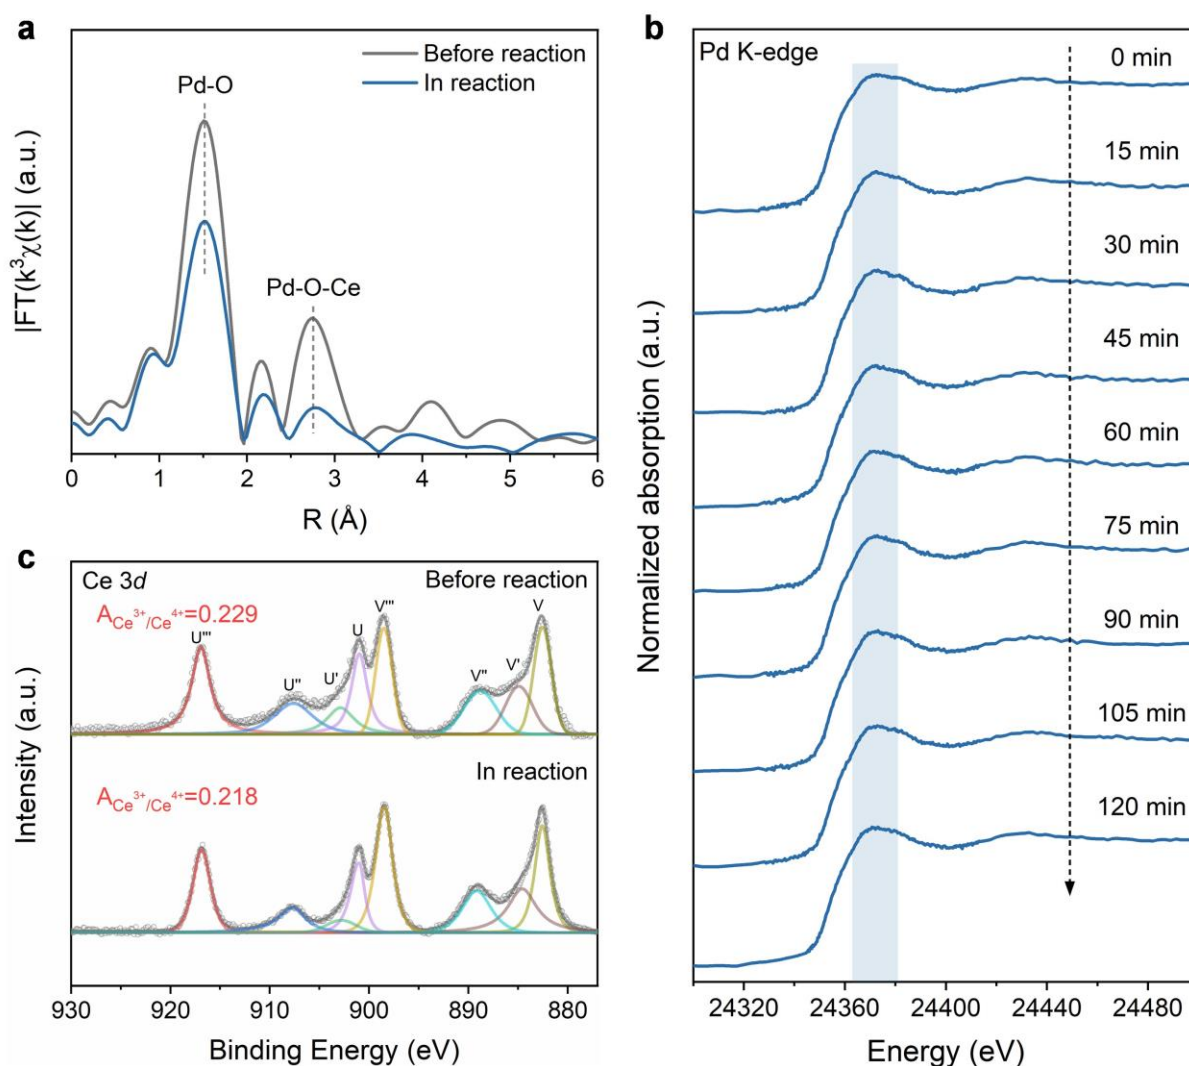

**Supplementary Fig. 15 | Operando XANES and ex situ XPS spectra during Suzuki cross-**

**coupling reaction. a**, Fourier-transformed EXAFS spectra of Pd<sub>1</sub> ASAC collected before and during the Suzuki cross-coupling reaction. **b**, Operando Pd K-edge XANES of Pd<sub>1</sub> ASAC recorded at different times in the Suzuki cross-coupling reaction. **c**, Ex situ XPS spectra of Pd<sub>1</sub> ASAC measured before and in the Suzuki cross-coupling reaction. The peaks V' and U' correspond to the signals of Ce<sup>3+</sup> species, and the others are assigned to the Ce<sup>4+</sup> species.

The changes in the chemical state of Pd<sub>1</sub> ASAC during the Suzuki cross-coupling reaction can be observed from the in situ Pd K-edge XANES. Throughout the reaction, there are no significant peak shifts or intensity changes, indicating that the valence state of Pd does not undergo substantial changes. In the Fourier-transformed EXAFS spectra, the intensity of the main peaks associated with the first coordination shell path Pd-O and the second coordination shell path Pd-O-Ce decreases, indicating a

reduction in the coordination number of Pd-O. This demonstrates that during the reaction, Pd<sub>1</sub> ASAC transfers from the initial Pd-O<sub>4</sub> planar four-coordination structure through the opening of two Pd-O bonds, with the Pd atom being pulled up and bonded by dissociated phenyl and bromide ions, forming a new four-coordinated configuration, consistent with DFT calculations. Ex situ XPS results showed a slight increase in Ce<sup>3+</sup>/Ce<sup>4+</sup> ratio during the reaction, which may be due to the transfer of electrons from Ce atoms to Pd atoms in ASAC during the oxidative addition process, thus ensuring that the valence state of Pd remains constant.

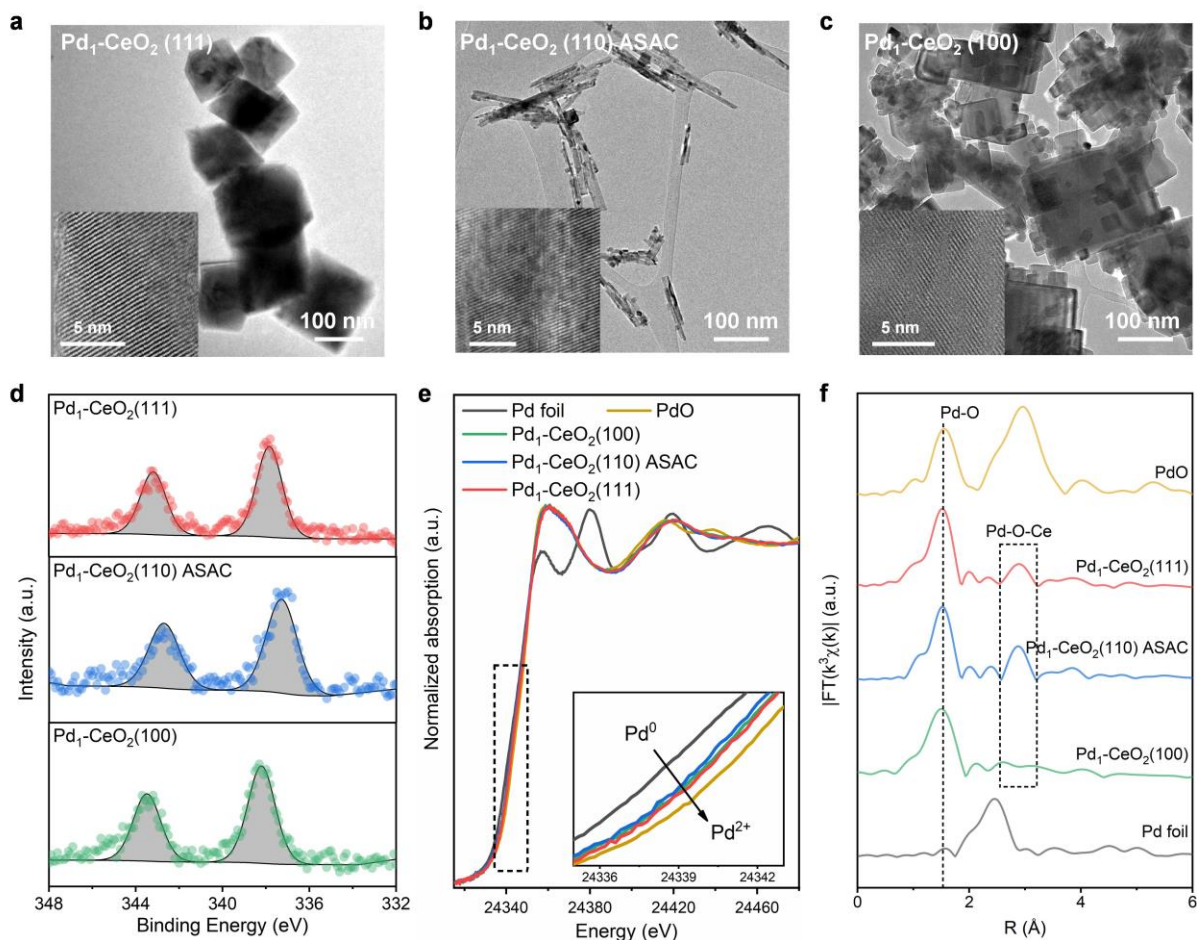

**Supplementary Fig. 16 | characterizations of Pd<sub>1</sub> anchored on facet-dependent CeO<sub>2</sub>. TEM**

images of Pd<sub>1</sub>-CeO<sub>2</sub>(111) (**a**), Pd<sub>1</sub>-CeO<sub>2</sub>(110) ASAC (**b**), Pd<sub>1</sub>-CeO<sub>2</sub>(100) (**c**), inserts are their HRTEM images respectively. **d**, Pd 3d XPS spectra, **e**, Pd K-edge XANES spectra, **f**, Pd K-edge Fourier transformed EXAFS spectra of Pd single atoms on facet-dependent CeO<sub>2</sub>.



203

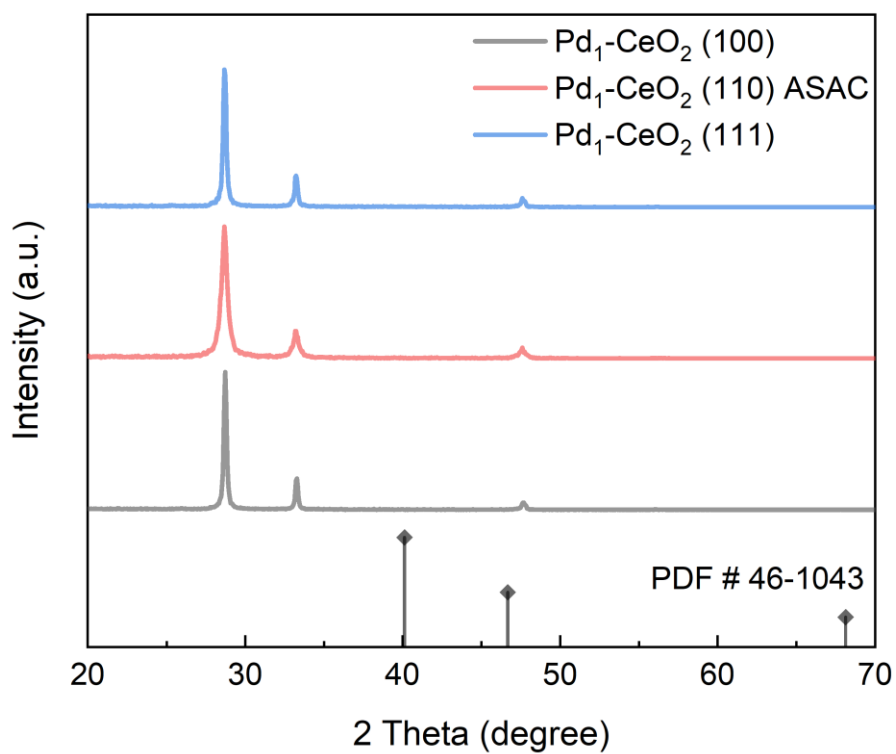

204 **Supplementary Fig. 17** | XRD patterns of Pd<sub>1</sub>-CeO<sub>2</sub>(100), Pd<sub>1</sub>-CeO<sub>2</sub>(110) ASAC, and Pd<sub>1</sub>-CeO<sub>2</sub>(111).

205

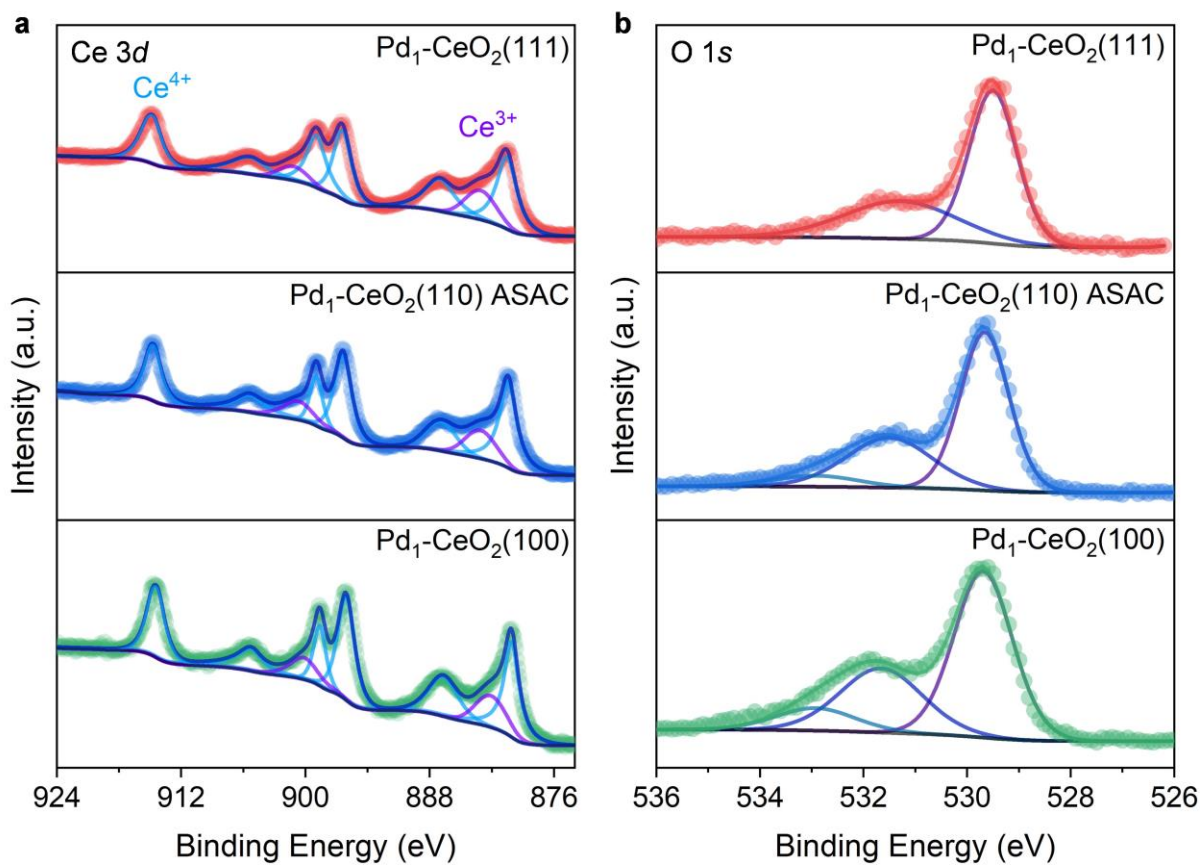

**Supplementary Fig. 18** | Characterization of catalysts. **a**, Ce 3d XPS spectra, **b**, O 1s XPS spectra of Pd single atoms on facet-dependent  $\text{CeO}_2$ .

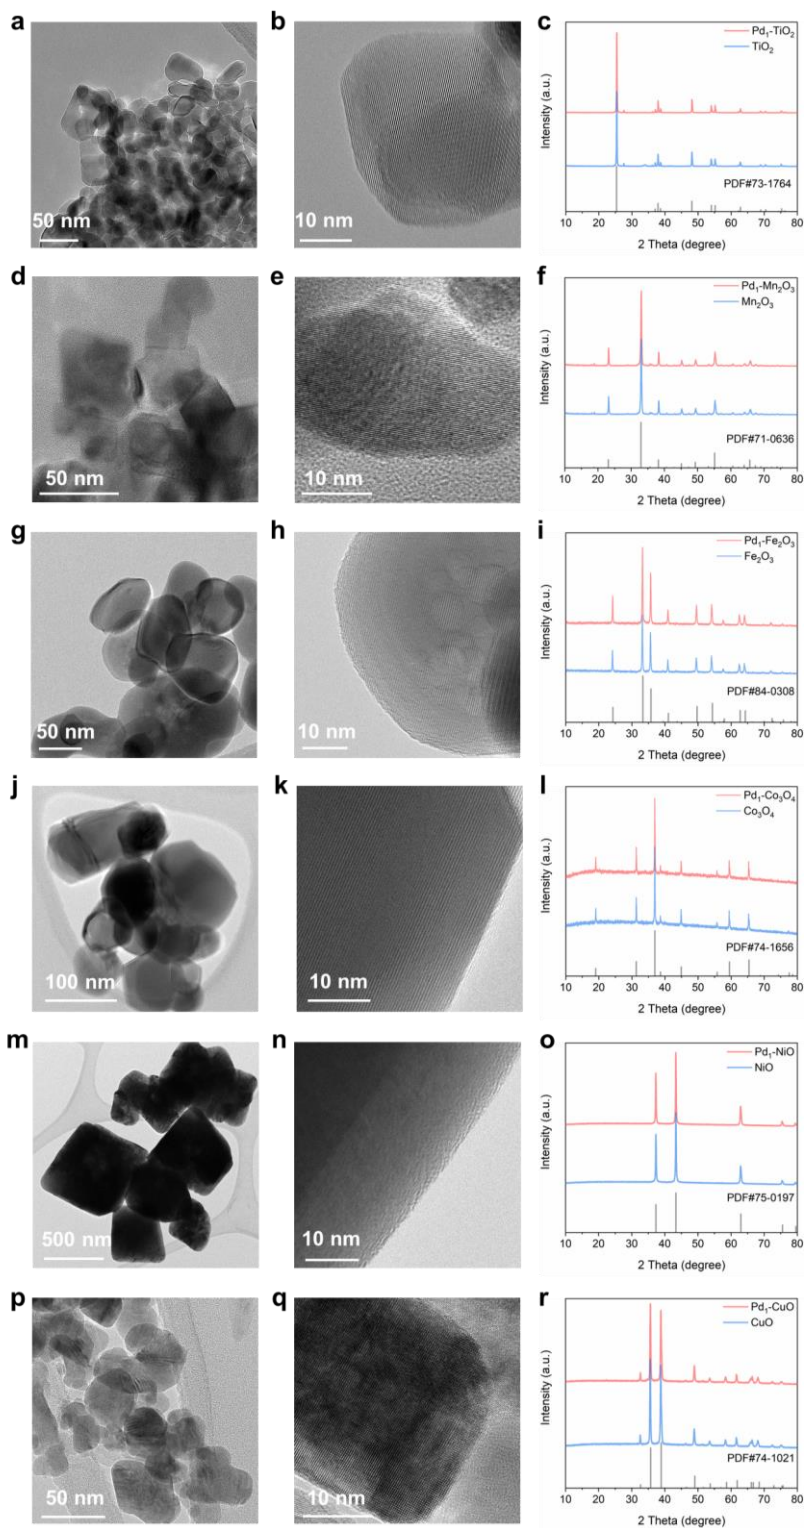

211 **Supplementary Fig. 19** | Characterization of catalysts. Low-magnification TEM images of Pd<sub>1</sub>-TiO<sub>2</sub>  
 212 (a), Pd<sub>1</sub>-Mn<sub>2</sub>O<sub>3</sub> (d), Pd<sub>1</sub>-Fe<sub>2</sub>O<sub>3</sub> (g), Pd<sub>1</sub>-Co<sub>3</sub>O<sub>4</sub> (j), Pd<sub>1</sub>-NiO (m), and Pd<sub>1</sub>- CuO (p). High-resolution  
 213 TEM images of Pd<sub>1</sub>-TiO<sub>2</sub> (b), Pd<sub>1</sub>-Mn<sub>2</sub>O<sub>3</sub> (e), Pd<sub>1</sub>-Fe<sub>2</sub>O<sub>3</sub> (h), Pd<sub>1</sub>-Co<sub>3</sub>O<sub>4</sub> (k), Pd<sub>1</sub>-NiO (n), and Pd<sub>1</sub>- CuO  
 214 (q). XRD patterns of Pd<sub>1</sub>-TiO<sub>2</sub> (c), Pd<sub>1</sub>-Mn<sub>2</sub>O<sub>3</sub> (f), Pd<sub>1</sub>-Fe<sub>2</sub>O<sub>3</sub> (i), Pd<sub>1</sub>-Co<sub>3</sub>O<sub>4</sub> (l), Pd<sub>1</sub>-NiO (o), and Pd<sub>1</sub>-  
 215 CuO (r).

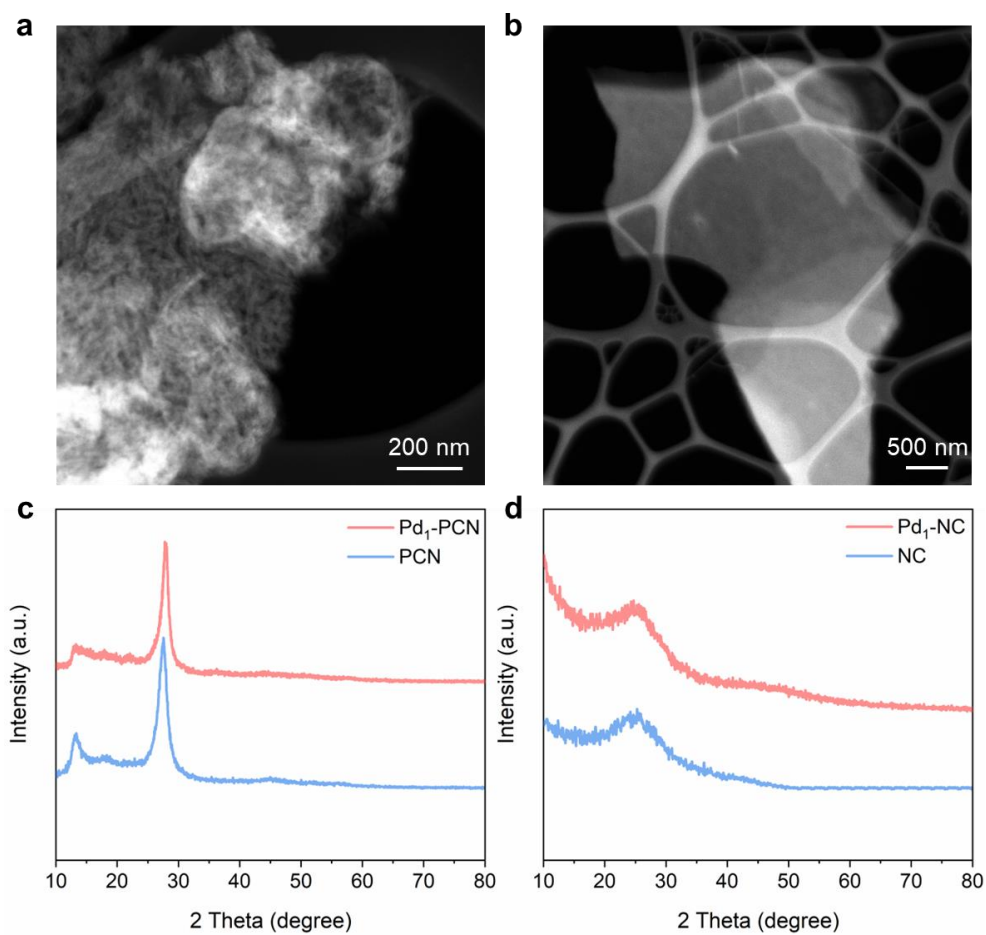

**Supplementary Fig. 20** | Characterization of catalysts. TEM images of Pd<sub>1</sub>-PCN (a), Pd<sub>1</sub>-NC (b). XRD patterns of Pd<sub>1</sub>-PCN (c), Pd<sub>1</sub>-NC (d).

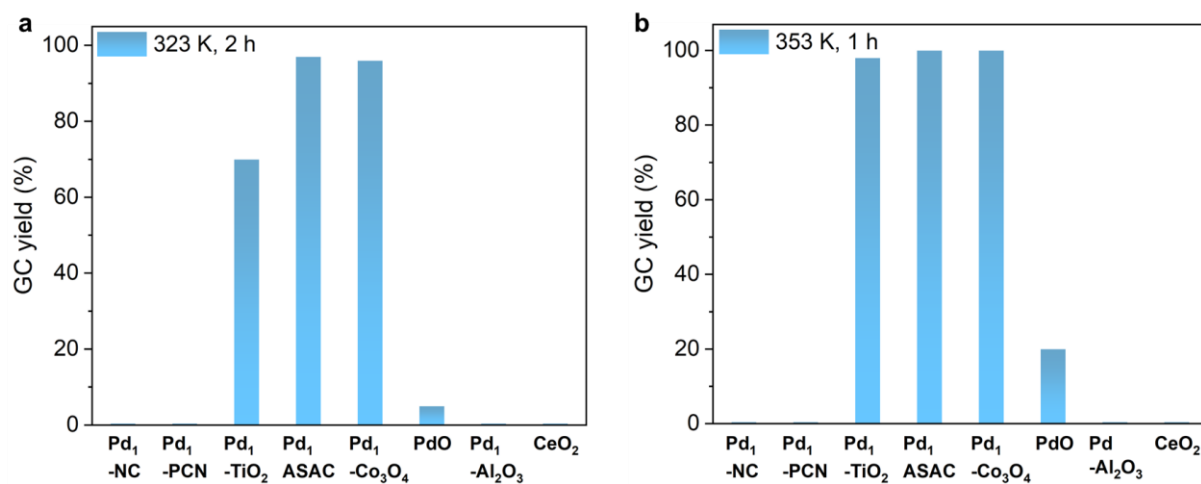

**Supplementary Fig. 21** | Yield of biphenyl for reactions at 323 K (a) and 353 K (b).

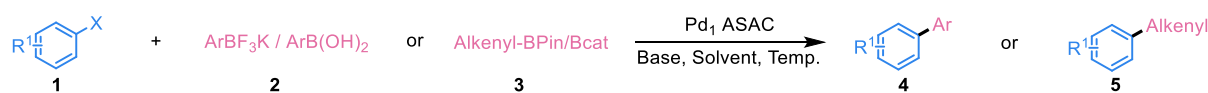

**Supplementary Fig. 22** | The schematic illustration of Suzuki cross-coupling reactions.

General procedures: Compounds **1**, **2**, or **3**, Pd<sub>1</sub> ASAC, and the base were dissolved in the specified solvent. The reaction mixture was stirred at the designated temperature for the required duration. After completion, the solvent was evaporated under reduced pressure, and the residue was re-dissolved in a mixture of ethyl acetate and water. The organic phase was separated and dried over anhydrous sodium sulfate. The solvent was again evaporated under reduced pressure, yielding the crude product mixture. Further purification by silica gel column chromatography afforded compound **4** or **5**.

Different conditions for diverse substrates, refer to Fig. 3: Conditions: a: **1** (0.5 mmol), **2** (ArB(OH)<sub>2</sub>, 0.6 mmol), Pd<sub>1</sub> ASAC (5 mg, 0.35 mol%), K<sub>2</sub>CO<sub>3</sub> (1.5 mmol), EtOH/H<sub>2</sub>O (2 mL: 2 mL), 80 °C, 10 h. b: **1** (0.5 mmol), **2** (ArB(OH)<sub>2</sub>, 0.6 mmol), Pd<sub>1</sub> ASAC (5 mg, 0.35 mol%), K<sub>2</sub>CO<sub>3</sub> (1.5 mmol), EtOH/H<sub>2</sub>O (2 mL: 2 mL), 100 °C, 20 h. c: **1** (0.5 mmol), **2** (ArB(OH)<sub>2</sub>, 0.6 mmol), Pd<sub>1</sub> ASAC (5 mg, 0.35 mol%), K<sub>2</sub>CO<sub>3</sub> (1.5 mmol), THF/H<sub>2</sub>O (2 mL: 2 mL), 100 °C, 24 h. d: **1** (0.2 mmol), **2** (ArBF<sub>3</sub>K, 0.3 mmol), KHCO<sub>3</sub> (0.6 mmol), Pd<sub>1</sub> ASAC (10.5 mg, 0.35 mol%), EtOH/H<sub>2</sub>O (1.5 mL: 0.5 mL), 100 °C, 24 h. e: **1** (0.5 mmol), **2** (ArB(OH)<sub>2</sub>, 1.2 mmol), Pd<sub>1</sub> ASAC (5 mg, 0.35 mol%), K<sub>2</sub>CO<sub>3</sub> (3 mmol), EtOH/H<sub>2</sub>O (2 mL: 2 mL), 80 °C, 10 h, isolated yield. f: **1** (0.2 mmol), **3** (0.24 mmol), K<sub>3</sub>PO<sub>4</sub> (0.6 mmol), Pd<sub>1</sub> ASAC (10.5 mg, 0.35 mol%), EtOH/H<sub>2</sub>O (1.6 mL: 0.4 mL), 80 °C, 24 h. g: **1** (0.2 mmol), **3** (0.24 mmol), K<sub>3</sub>PO<sub>4</sub> (0.6 mmol), Pd<sub>1</sub> ASAC (10.5 mg, 0.35 mol%), EtOH/H<sub>2</sub>O (1.6 mL: 0.4 mL), 80 °C, 63 h, isolated yield.

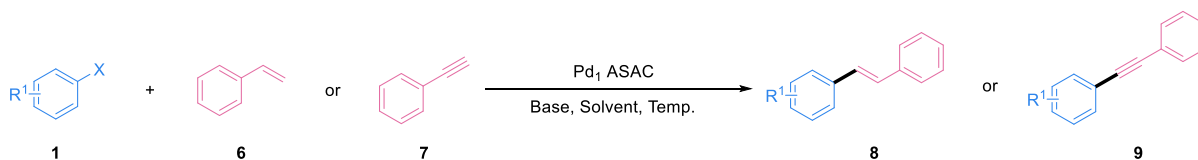

**Supplementary Fig. 23** | The schematic illustration of the Heck and Sonogashira cross-coupling reactions.

General procedures: Compounds **1**, **6**, or **7**, Pd<sub>1</sub> ASAC, and the base were dissolved in the specified solvent. The reaction mixture was stirred at the designated temperature for the required duration. After completion, the solvent was evaporated under reduced pressure, and the residue was re-dissolved in a mixture of ethyl acetate and water. The organic phase was separated and dried over anhydrous sodium sulfate. The solvent was again evaporated under reduced pressure, yielding the crude product mixture. Further purification by silica gel column chromatography afforded compound **8** or **9**.

Different conditions for diverse substrates: a: **1** (0.5 mmol), **6** (1 mmol), Pd<sub>1</sub> ASAC (5.3 mg, 0.07 mol%), K<sub>2</sub>CO<sub>3</sub> (1.5 mmol), EtOH/H<sub>2</sub>O (2 mL: 2 mL), 100 °C, 10 h, isolated yield. b: **1** (0.5 mmol), **7** (0.75 mmol), Pd<sub>1</sub> ASAC (5.3 mg, 0.07 mol%), K<sub>2</sub>CO<sub>3</sub> (3 mmol), EtOH/H<sub>2</sub>O (3.5 mL: 0.5 mL), 100 °C, 10 h, isolated yield.

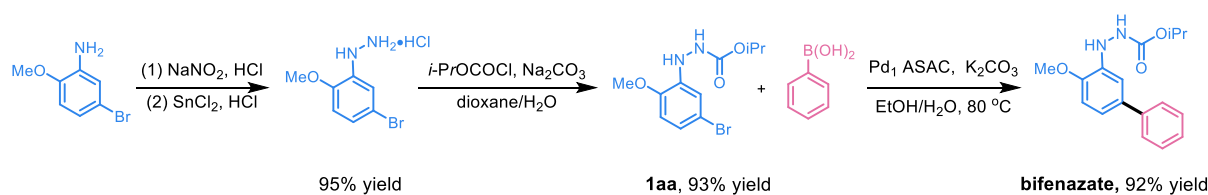

## Supplementary Fig. 24 | Synthesis of bifentazate.

Procedure for the preparation of 5-bromo-2-methoxyphenylhydrazine hydro-chloride: The reaction mixture was maintained at 0 °C during this procedure. 5-bromo-2-methoxyaniline (2.00 g, 10.0 mmol) was added to vigorously stirred concentrated HCl (17 mL) and aged for 10 min. A solution of NaNO<sub>2</sub> (691 mg, 10.0 mmol) in distilled water (4 mL) was added dropwise over 10 min and the mixture was stirred for an additional 15 min. A solution of SnCl<sub>2</sub>·H<sub>2</sub>O (498 mg, 22.0 mol) in concentrated HCl (5 mL) was added dropwise. The reaction mixture was stirred for 30 min and filtered. The product was dried in vacuo overnight to afford 5-bromo-2-methoxyphenylhydrazine hydrochloride as a brown solid (2.38 g, 95% yield).

Procedure for the preparation of compound **1aa**: A solution of 5-bromo-2-methoxyphenylhydrazine hydrochloride (2.00 g, 7.90 mmol) and triethylamine (2.28 mL, 16.6 mmol) in CH<sub>2</sub>Cl<sub>2</sub> (16 mL) was cooled to 0 °C and a solution of isopropyl chloroformate (0.93 mL, 8.08 mmol) in CH<sub>2</sub>Cl<sub>2</sub> (8 mL) was added dropwise at a rate that maintained a temperature below 0 °C. When the addition was complete, the reaction mixture was allowed to warm to room temperature. The reaction mixture was stirred for 3h and concentrated in vacuo. The residue was purified by flash column chromatography on silica gel (n-hexane/EtOAc, 2:1) to afford isopropyl 3-(5-bromo-2-methoxyphenyl)carbazate as a colorless solid (2.21 g, 93% yield).

Procedure for the preparation of bifentazate: In a 20-mL round-bottom flask with a stir bar, added isopropyl 3-(5-bromo-2-methoxyphenyl)carbazate (151 mg, 0.5 mmol), phenylboronic acid (92 mg, 0.75 mmol), K<sub>2</sub>CO<sub>3</sub> (207 mg, 1.5 mmol), Pd<sub>1</sub> ASAC (5 mg, 0.35 mol%), H<sub>2</sub>O (2 mL), and EtOH (2 mL) and the system was sealed with a septum. The mixture was stirred at 80 °C for 12 h. The mixture was diluted with H<sub>2</sub>O (50 mL) and EtOAc (50 mL), and filtered through a Celite pad. The filtrate was separated into two layers and the aqueous layer was extracted with EtOAc (2 × 50 mL). The combined organic layers were washed with brine (50 mL), dried over Na<sub>2</sub>SO<sub>4</sub>, and concentrated in vacuo. The



279 residue was purified by flash column chromatography on silica gel (n-hexane/EtOAc, 50:1 to 5:1) to  
280 afford bifenazate as a yellow solid (138 mg, 92% yield).

281

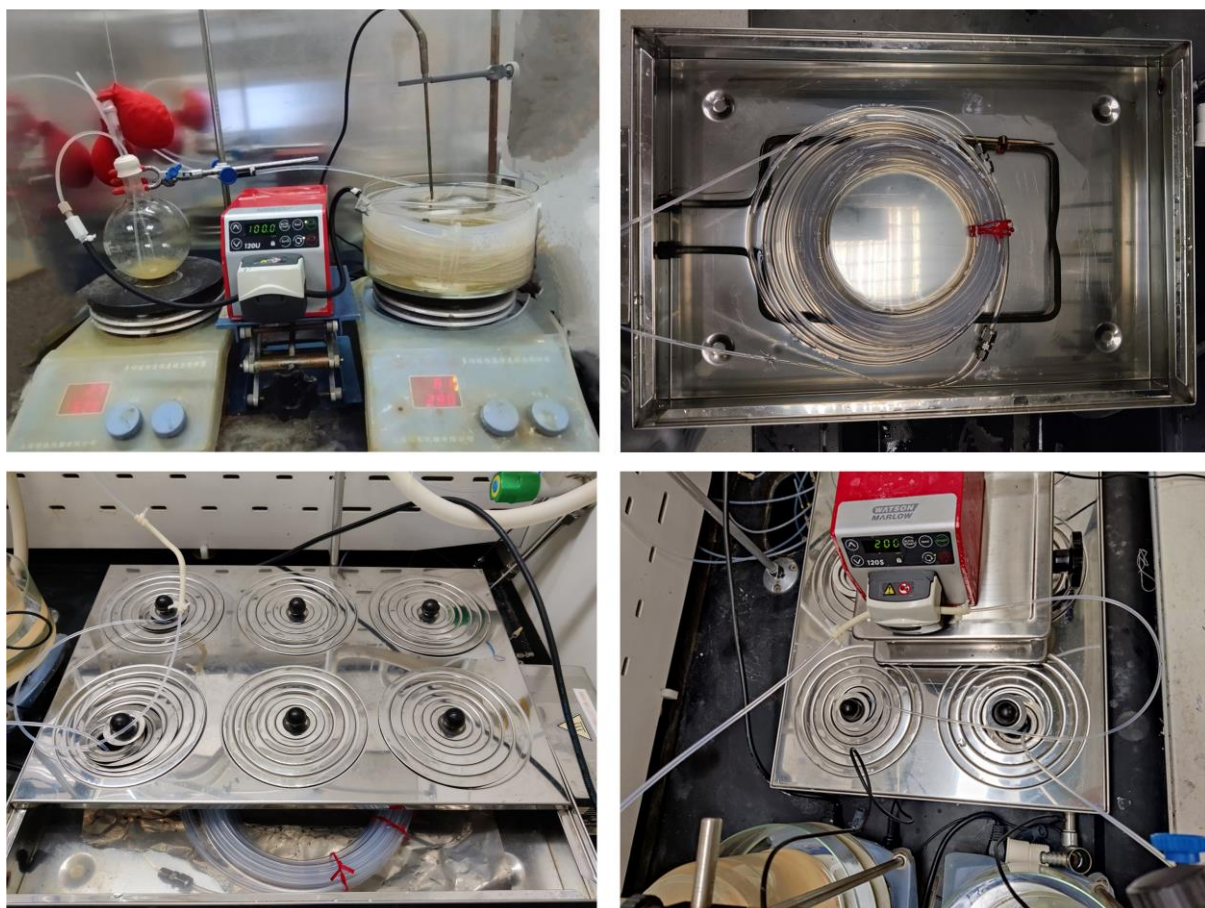

**Supplementary Fig. 25** | High-rate circulation flow devices for evaluating catalytic performance. Reaction tubing, PFA tubing reactor (outer diameter (O.D.) = 4.8 mm, inner diameter (I.D.) = 3.2 mm, volume (V) = 240 mL) Contherm stainless steel water bath; load 2300W; set temperature: 80 ° C. **d**, Watson-Marlow 100 series cased pump; 120S control, drive with 114DV Pumphead; 4 rollers, Max. operating pressure 2bar, Max.; Tygon® Norprene® Peristaltic Pump.

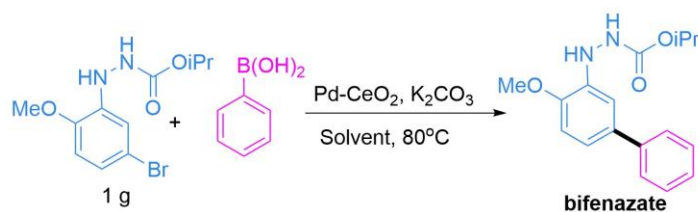

Conditions optimization:

| Entries          | Pd-CeO <sub>2</sub><br>(X mg) | Equivalents of<br>boronic acid and base | Flow rate | Solvent                     | Temp. | Conversion       |
|------------------|-------------------------------|-----------------------------------------|-----------|-----------------------------|-------|------------------|
| 1 <sup>[a]</sup> | 20                            | 1.5                                     | 10 mL/min | EtOH/H <sub>2</sub> O (1:1) | 80°C. | 0                |
| 2 <sup>[a]</sup> | 50                            | 1.5                                     | 10 mL/min | EtOH/H <sub>2</sub> O (1:1) | 80°C. | 30%              |
| 3 <sup>[b]</sup> | 50                            | 3                                       | 10 mL/min | EtOH/H <sub>2</sub> O (1:1) | 80°C. | 70% (block)      |
| 4 <sup>[a]</sup> | 50                            | 3                                       | 10 mL/min | THF/H <sub>2</sub> O (1:1)  | 80°C. | 0                |
| 5 <sup>[c]</sup> | 50                            | 3                                       | 10 mL/min | EtOH/H <sub>2</sub> O (2:1) | 80°C. | 100% (91% yield) |

Conditions: [a] Reaction time = 12 h, [b] Reaction time = 3 h, [c] Reaction time = 5 h.

### Supplementary Fig. 26 | Conditions optimization for flow synthesis.

Blockage of the reaction tube is a limiting factor for heterogeneous catalysts in flow synthesis experiments. As illustrated in **Supplementary Fig. 26**, at 1 g scale, insufficient feeding of the catalyst and phenylboronic acid results in low reaction conversion. However, increasing the amounts of catalysts and phenylboronic acid leads to micro-tubing reactor blocking. To address this issue, we optimized the flow rate (10 mL/min), catalyst feeding (50 mg), K<sub>2</sub>CO<sub>3</sub> and boronic acid (3 equiv.), and solvent ratio (EtOH/H<sub>2</sub>O, 2:1), achieving both sufficient reagent solubility and high reaction yields. Consequently, this modified condition was adopted for circulation flow synthesis.

Note: When we performed a larger scale (10 g) synthesis, we further increased the amount of catalyst (400 mg) to achieve efficient reaction and flow rate (40 mL/min) to avoid clogging.

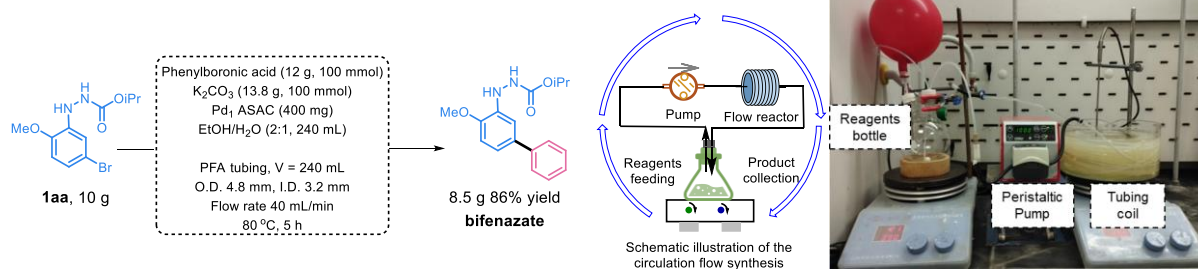

**Supplementary Fig. 27** | Large-scale circulated flow synthesis of bifenzate. High-purity perfluoroalkoxy polymer (HPFA) tubing and fittings were purchased from IDEX Health & Science Technologies. The peristaltic pump was purchased from Watson-Marlow.

Substrate **1aa** was mixed with 400 mg  $Pd_1$  ASAC, 12 g phenylboronic acid and 13.8 g potassium carbonate in 240 mL of EtOH/ $H_2O$  (2:1) to create a slurry. The slurry was continuously pumped at 40 mL/min using a peristaltic pump and directed to the PFA tubing reactor (outer diameter (O.D.) = 4.8 mm, inner diameter (I.D.) = 3.2 mm, volume ( $V$ ) = 240 mL) which was heated to 80 °C with the heating module. The reaction mixture was recirculated to the original reservoir until the reaction was completed to afford bifenzate in 86% isolated yield.

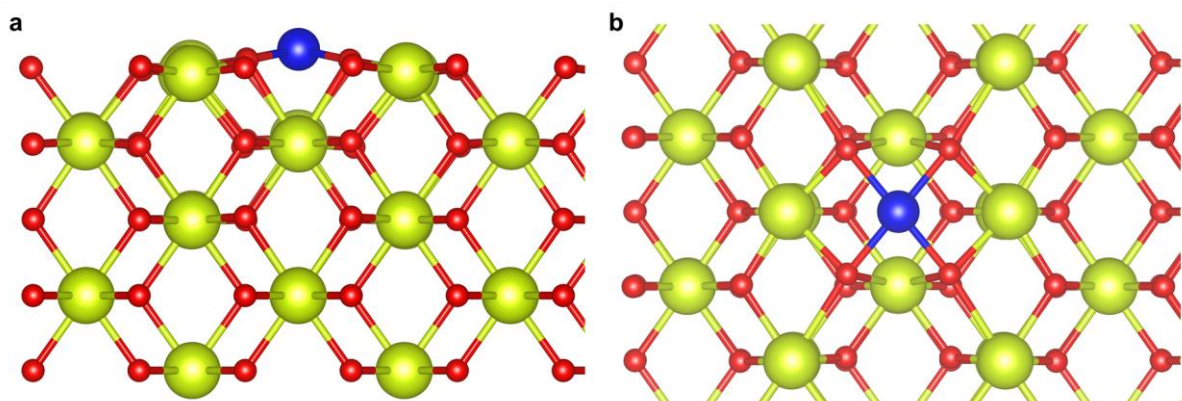

**Supplementary Fig. 28** | Structure of Pd<sub>1</sub> ASAC calculated by DFT. Side (a) and top (b) views of the optimized structure of Pd<sub>1</sub> ASAC model. The red, yellow, and blue spheres represent oxygen, cerium, and palladium, respectively.

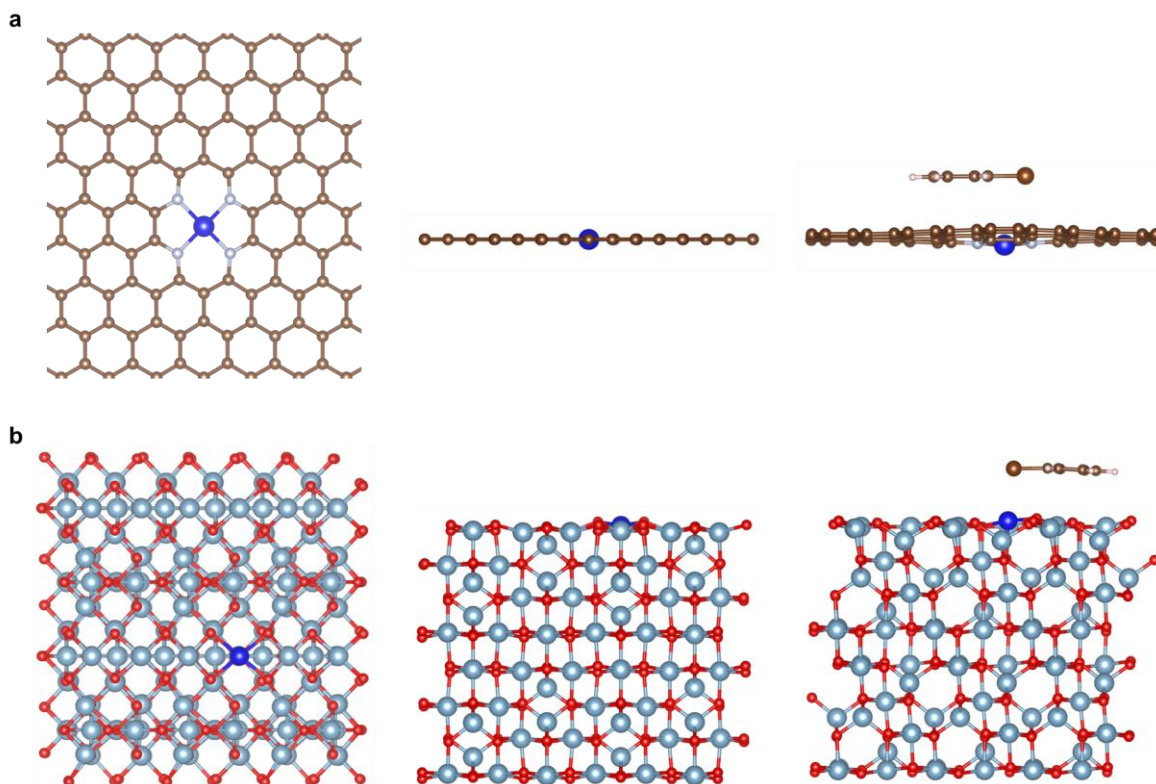

**Supplementary Fig. 29** | Structural models of Pd<sub>1</sub>-NC (a) and Pd<sub>1</sub>-Al<sub>2</sub>O<sub>3</sub> (b) and optimized structures in the oxidative addition step calculated by DFT.

Reducible support is essential for the design of highly active catalysts for cross-coupling reactions, as it functions as electron reservoirs to address the high reaction energy barriers associated with the bivalent elevation at a single metal site. Moreover, achieving a dynamic and reversible coordination transition between Pd single atoms and the support is essential to regulate the electronic structure of the metal center during the reaction. However, in the case of NC, the Pd-N bonds lack the ability to undergo dynamic transitions during the reaction, resulting in catalytic inactivity. In addition, carbon is known to be a conduct but not to be a reducible support that has the excellent capability to accept/donor the electrons. As illustrated in **Supplementary Fig. 29a**, the dissociation of the C-Br bond in bromobenzene was adsorbed on Pd<sub>1</sub>-NC, followed by structural optimization. However, the system reverted to the initial bromobenzene configuration, which was also shown in the case of Al<sub>2</sub>O<sub>3</sub> (**Supplementary Fig. 29b**), demonstrating that single atom Pd on a non-reducible support is incapable of activating bromobenzene (**Supplementary Video 2 and 3**).

331 **Supplementary Table 1** | The formation energies of Pd single-atom on different crystal planes of CeO<sub>2</sub>.

| Crystal planes                                  | E <sub>form</sub> (eV) |
|-------------------------------------------------|------------------------|
| Pd <sub>1</sub> -CeO <sub>2</sub> (110) ASAC    | −1.37                  |
| Pd <sub>1</sub> -CeO <sub>2</sub> (100)         | −1.66                  |
| Pd <sub>1</sub> -CeO <sub>2</sub> (111)         | 0.84                   |
| Pd <sub>1</sub> -NC                             | −2.76                  |
| Pd <sub>1</sub> -Al <sub>2</sub> O <sub>3</sub> | −5.52                  |

332

333



334 **Supplementary Table 2** | Results of EXAFS fittings of catalysts.

| Sample                                          | Shell | <i>N</i>  | <i>R</i> (Å) | $\sigma^2$ (10 <sup>-3</sup> Å <sup>2</sup> ) | R factor |
|-------------------------------------------------|-------|-----------|--------------|-----------------------------------------------|----------|
| Pd <sub>1</sub> ASAC                            | Pd-O  | 4.0 ± 0.5 | 2.01 ± 0.01  | 0.0024 ± 0.0013                               | 0.026    |
|                                                 | Pd-Ce | 3.9 ± 1.3 | 3.14 ± 0.02  | 0.0068 ± 0.0018                               |          |
| Pd <sub>1</sub> -CeO <sub>2</sub><br>(110) ASAC | Pd-O  | 4.0±0.5   | 1.99±0.01    | 0.0014±0.0008                                 | 0.024    |
|                                                 | Pd-Ce | 3.7±1.5   | 3.15±0.02    | 0.0055±0.0019                                 |          |
| Pd <sub>1</sub> -CeO <sub>2</sub><br>(100)      | Pd-O  | 4.1±0.6   | 1.99±0.01    | 0.0012±0.0009                                 | 0.007    |
| Pd <sub>1</sub> -CeO <sub>2</sub><br>(111)      | Pd-O  | 3.9±0.3   | 1.99±0.01    | 0.0010±0.0009                                 | 0.019    |
|                                                 | Pd-Ce | 3.4±1.0   | 3.18±0.02    | 0.0081±0.0026                                 |          |
| Pd <sub>1</sub> -NC                             | Pd-N  | 4.3±0.2   | 1.95±0.02    | 0.0032±0.0009                                 | 0.009    |
| Pd <sub>1</sub> -Al <sub>2</sub> O <sub>3</sub> | Pd-O  | 3.9±0.5   | 2.19±0.01    | 0.0061±0.0009                                 | 0.029    |

335 *N*, coordination number; *R*, distance between absorbing and backscattering atoms;  $\sigma^2$ , Debye-Waller  
336 factor to account for thermal and structural disorders; R factor as a measure of the goodness of fit.

337



**Supplementary Table 3** | Comparison of turnover frequencies of reported Pd catalysts in Suzuki cross-coupling reaction.

| Entry | Catalyst                                                                         | Substrate                                                                           | Conditions   | Reaction mode          | TOF<br>(h <sup>-1</sup> ) | Ref. |
|-------|----------------------------------------------------------------------------------|-------------------------------------------------------------------------------------|--------------|------------------------|---------------------------|------|
| 1     | C <sub>18</sub> H <sub>25</sub> C <sub>12</sub> N <sub>3</sub> O <sub>4</sub> Pd |    | 333 K/24 h   | homogeneous            | 2.0                       | [1]  |
| 2     | C <sub>24</sub> H <sub>45</sub> NP <sub>2</sub> Pd                               |    | 338 K/16 h   | homogeneous            | 3.2                       | [2]  |
| 3     | (PPh <sub>3</sub> ) <sub>2</sub> PdCl <sub>2</sub>                               |    | 383 K/24 h   | homogeneous            | 8.2                       | [3]  |
| 4     | Pd(OAc) <sub>2</sub>                                                             |    | 333 K/6 h    | homogeneous            | 15                        | [4]  |
| 5     | Pd/C                                                                             |    | 393 K/2 h    | heterogeneous          | 10000                     | [5]  |
| 6     | Pd/CeO <sub>2</sub>                                                              |    | 393 K/4 h    | heterogeneous          | 4100                      | [5]  |
| 7     | Pd/Graphene                                                                      |  | 353 K/20 h   | heterogeneous          | 57                        | [6]  |
| 8     | Pd/NMC                                                                           |  | 323 K/2 h    | heterogeneous          | 137                       | [7]  |
| 9     | Pd <sub>0.10</sub> /g-C <sub>3</sub> N <sub>4</sub>                              |  | 298 K/30 min | heterogeneous          | 120.93                    | [8]  |
| 10    | Pd@mZ-x-H                                                                        |  | 333 K/30 min | heterogeneous          | 4050                      | [9]  |
| 11    | Pd@CMK-3                                                                         |  | 333 K/5 min  | heterogeneous          | 2800                      | [10] |
| 12    | Pd(0)-MCM-41                                                                     |  | 353 K/12 h   | heterogeneous          | 6990                      | [11] |
| 13    | Pd/Pyr-GDY                                                                       |  | 353 K/5 h    | heterogeneous          | 18000                     | [12] |
| 14    | Pd <sub>1</sub> /UiO-66-NH <sub>2</sub>                                          |  | 333 K/2 h    | heterogeneous<br>(SAC) | 13043                     | [13] |
| 15    | Pd-ECN                                                                           |  | 393 K/10 min | heterogeneous<br>(SAC) | 549                       | [14] |

|    |                                                     |                                                                                    |         |        |                     |        |           |
|----|-----------------------------------------------------|------------------------------------------------------------------------------------|---------|--------|---------------------|--------|-----------|
| 16 | Pd-SAs/3DOM-CeO <sub>2</sub>                        |   | 298 min | K/15   | heterogeneous (SAC) | 520.01 | [15]      |
| 17 | Pd-N <sub>3</sub> C <sub>1</sub>                    |   | 373 min | K/24 h | heterogeneous (SAC) | 4.2    | [16]      |
| 18 | Pd <sub>1</sub> /C <sub>3</sub> N <sub>4</sub> /rGO |   | 333 min | K/60   | heterogeneous (SAC) | 362.37 | [17]      |
| 19 | Pd/C                                                |   | 323 min | K/2 h  | heterogeneous       | 325    | This work |
| 20 | Pd <sub>1</sub> ASAC                                |   | 298 min | K/15   | heterogeneous (SAC) | 2820   | This work |
| 21 | Pd <sub>1</sub> ASAC                                |   | 323 min | K/15   | heterogeneous (SAC) | 9820   | This work |
| 22 | Pd <sub>1</sub> ASAC                                |  | 343 min | K/5    | heterogeneous (SAC) | 46149  | This work |

TOF = [(mole of converted aryl halides / mole of Pd catalyst) / reaction time].

**Supplementary Table 4** | Comparison of Pd content in catalysts before and after reaction.

| Catalyst                                        | Pd content (wt.%) |                        |                        |
|-------------------------------------------------|-------------------|------------------------|------------------------|
|                                                 | Before reaction   | After reaction (80 °C) | After reaction (50 °C) |
| Pd <sub>1</sub> -TiO <sub>2</sub>               | 0.23              | 0.22                   | 0.22                   |
| Pd <sub>1</sub> -Mn <sub>2</sub> O <sub>3</sub> | 0.36              | 0.16                   | 0.33                   |
|                                                 |                   | 0.14                   | 0.35                   |
| Pd <sub>1</sub> -Fe <sub>2</sub> O <sub>3</sub> | 0.29              | 0.29                   | 0.28                   |
| Pd <sub>1</sub> -Co <sub>3</sub> O <sub>4</sub> | 0.29              | 0.29                   | 0.28                   |
|                                                 |                   | 0.30                   | 0.29                   |
| Pd <sub>1</sub> -NiO                            | 0.32              | 0.19                   | 0.12                   |
|                                                 |                   | 0.21                   | 0.21                   |
| Pd <sub>1</sub> -CuO                            | 0.32              | 0.08                   | 0.10                   |
|                                                 |                   | 0.09                   | 0.11                   |
| Pd <sub>1</sub> ASAC                            | 0.27              | 0.27                   | 0.28                   |
|                                                 | 0.93              | 0.94                   | 0.93                   |

Experimental procedure: Bromobenzene (0.5 mmol), phenylboronic acid (0.6 mmol), K<sub>2</sub>CO<sub>3</sub> (1.5 mmol), Pd<sub>1</sub> ASAC (0.07 mol%, according to Pd), ethanol (2 mL), and H<sub>2</sub>O (2 mL) were sequentially added to the screw-top reaction tube. The reaction tube was placed in an oil bath preheated to 80 °C, and stirring in an ambient atmosphere. After the reaction, the catalyst was filtered out, and fresh phenylboronic acid and base were added to the filtrate for a subsequent reaction. GC-MS analysis detected 0% conversion of the new substrate, indicating no leaching of Pd ions into the filtrate. This finding was supported by ICP-AES analysis, which showed that the Pd content in the catalyst remained virtually unchanged before and after the reaction, with no detectable Pd ions in the solution

352 **CP2K input file for structural optimization:**

353

354 &GLOBAL

355 PROJECT Pd1-CeO2

356 RUN\_TYPE GEO\_OPT

357 PRINT\_LEVEL MEDIUM

358 &END GLOBAL

359

360 &MOTION

361 &GEO\_OPT

362 OPTIMIZER BFGS

363 MAX\_ITER 1300

364 MAX\_FORCE 4.50E-04

365 &END GEO\_OPT

366 &CONSTRAINT

367 &FIXED\_ATOMS

368 LIST 12..47 130..147

369 &END FIXED\_ATOMS

370 &END CONSTRAINT

371 &PRINT

372 &TRAJECTORY SILENT

373 ADD\_LAST NUMERIC

374 FILENAME ./MD\_TRAJECTORY.xyz

375 &EACH

376 MD 5

377 &END EACH

378 &END TRAJECTORY

379 &VELOCITIES SILENT

380 &EACH

381 MD 5

382 &END EACH

383 &END VELOCITIES

384 &RESTART SILENT

385 &EACH

386 MD 10

387 &END EACH

388 &END RESTART

389 &END PRINT

390 &END MOTION

391

392 &FORCE\_EVAL

393 METHOD Quickstep

394 &DFT

395 CHARGE 0

```

396     POTENTIAL_FILE_NAME  GTH_POTENTIALS
397     BASIS_SET_FILE_NAME   BASIS_MOLOPT
398     WFN_RESTART_FILE_NAME ./XXX-RESTART.wfn
399     UKS    T
400 &MGRID
401     CUTOFF 400
402     NGRIDS 20
403     REL_CUTOFF 60
404 &END MGRID
405 &QS
406     EPS_DEFAULT 1.0E-12
407     EPS_PGF_ORB 1.0E-6
408     EXTRAPOLATION ASPC
409     EXTRAPOLATION_ORDER 3
410 &END QS
411 &SCF
412     EPS_SCF 1.0E-6
413     MAX_SCF 60
414     SCF_GUESS RESTART
415     &OT
416         PRECONDITIONER FULL_ALL
417         MINIMIZER    BROYDEN
418         BROYDEN_BETA    0.9
419         BROYDEN_SIGMA    0.1
420         LINESEARCH    2PNT
421     &END OT
422     &OUTER_SCF
423         EPS_SCF 1.0E-6
424         MAX_SCF 5
425     &END OUTER_SCF
426     &MIXING ON
427         ALPHA 0.1
428         BETA  0.5
429     &END MIXING
430     &PRINT
431         &RESTART_HISTORY
432             FILENAME = MD_RESTART_HISTORY.wfn
433             ADD_LAST NUMERIC
434             BACKUP_COPIES 5
435         &EACH
436         &END EACH
437     &END RESTART_HISTORY
438 &END PRINT
439 &END SCF

```

```

440
441      &XC
442          &XC_FUNCTIONAL PBE
443          &END XC_FUNCTIONAL
444          &XC_GRID
445              XC_SMOOTH_RHO NN10
446              XC_DERIV SPLINE2_SMOOTH
447          &END XC_GRID
448          &vdW_POTENTIAL
449              POTENTIAL_TYPE PAIR_POTENTIAL
450              &PAIR_POTENTIAL
451                  TYPE DFTD3
452                  PARAMETER_FILE_NAME dftd3.dat
453                  REFERENCE_FUNCTIONAL PBE
454                  R_CUTOFF 10.
455              &END PAIR_POTENTIAL
456          &END vdW_POTENTIAL
457      &END XC
458      &PRINT
459          &MULLIKEN SILENT
460          FILENAME =CHARGE.mulliken
461          &EACH
462              MD 5
463          &END EACH
464      &END MULLIKEN
465  &END PRINT
466 &END DFT
467 &SUBSYS
468     &CELL
469         A 16.233000 0.000000 0.000000
470         B 0.000000 11.478460 0.000000
471         C 0.000000 0.000000 27.652310
472     PERIODIC XYZ
473 &END CELL
474
475     &TOPOLOGY
476         COORD_FILE_NAME init.xyz
477         COORD_FILE_FORMAT xyz
478     &END TOPOLOGY
479
480     &KIND H
481         BASIS_SET DZVP-MOLOPT-SR-GTH
482         POTENTIAL GTH-PBE-q1
483     &END KIND

```

```

484      &KIND Br
485          BASIS_SET DZVP-MOLOPT-SR-GTH
486          POTENTIAL GTH-PBE-q7
487      &END KIND
488      &KIND C
489          BASIS_SET DZVP-MOLOPT-SR-GTH
490          POTENTIAL GTH-PBE-q4
491      &END KIND
492      &KIND O
493          BASIS_SET DZVP-MOLOPT-SR-GTH
494          POTENTIAL GTH-PBE-q6
495      &END KIND
496      &KIND Pd
497          BASIS_SET DZVP-MOLOPT-SR-GTH
498          POTENTIAL GTH-PBE-q18
499      &END KIND
500      &KIND Ce
501          BASIS_SET DZVP-MOLOPT-SR-GTH
502          POTENTIAL GTH-PBE-q12
503          &DFT_PLUS_U T
504              L 3
505              U_MINUS_J [eV] 5
506          &END DFT_PLUS_U
507      &END KIND
508
509      &END SUBSYS
510      &END FORCE_EVAL
511

```

## Supplementary References

1. Steeples, E., Kelling, A., Schilde, U. & Esposito, D. Amino acid-derived N-heterocyclic carbene palladium complexes for aqueous phase Suzuki-Miyaura couplings. *New J. Chem.* **40**, 4922-4930 (2016).
2. van der Vlugt, J. I., Siegler, M. A., Janssen, M., Vogt, D. & Spek, A. L. A cationic AgI(PNPtBu) species acting as PNP transfer agent: facile synthesis of Pd(PNPtBu)(alkyl) complexes and their reactivity compared to PCPtBu analogues. *Organometallics*. **28**, 7025-7032 (2009).
3. Asachenko, A. F., Sorochkina, K. R., Dzhevakov, P. B., Topchiy, M. A. & Nechaev, M. S. Suzuki-Miyaura cross-coupling under solvent-free conditions. *Adv. Synth. Catal.* **355**, 3553-3557 (2013).
4. Myslinska, M., Heise, G. L. & Walsh, D. J. Practical and efficient applications of novel dioxaborolanes and dioxaborinanes in the synthesis of corresponding boronates and their use in the palladium-catalyzed cross coupling reactions. *Tetrahedron Lett.* **53**, 2937-2941 (2012).
5. Köhler, K., Heidenreich, R.G., Soomro, S.S. & Pröckl, S.S. Supported palladium catalysts for Suzuki reactions: structure-property relationships, optimized reaction protocol and control of palladium leaching. *Adv. Synth. Catal.* **350**, 2930-2936 (2008).
6. Gómez-Martínez, M., Buxaderas, E., Pastor, I. M. & Alonso, D. A. Palladium nanoparticles supported on graphene and reduced graphene oxide as efficient recyclable catalyst for the Suzuki-Miyaura reaction of potassium aryltrifluoroborates. *J. Mol. Catal. A: Chem.* **404-405**, 1-7 (2015).
7. Sun, J. et al. Green Suzuki-Miyaura coupling reaction catalyzed by palladium nanoparticles supported on graphitic carbon nitride. *Applied Catalysis B: Environmental*. **165**, 661-667 (2015).
8. Sun, J. et al. Green Suzuki-Miyaura coupling reaction catalyzed by palladium nanoparticles supported on graphitic carbon nitride. *Applied Catalysis B: Environmental*. **165**, 661-667 (2015).
9. Ke, W, et al. Mesoporous H-ZSM-5 nanocrystals with programmable number of acid sites as “solid ligands” to activate Pd nanoparticles for C–C coupling reactions. *Nano Research*. **11**, 874-881 (2018).
10. Wang, Z, et al. Pd embedded in porous carbon (Pd@CMK-3) as an active catalyst for Suzuki reactions: Accelerating mass transfer to enhance the reaction rate. *Nano research*. **7**, 1254-1262 (2014).
11. Jana, S., Haldar, S. & Koner, S. Heterogeneous Suzuki and Stille coupling reactions using highly efficient palladium (0) immobilized MCM-41 catalyst. *Tetrahedron Lett.* **50**, 4820-4823 (2009).
12. Yang, L.L. et al. A graphdiyne-based carbon material for electroless deposition and stabilization of sub-nanometric Pd catalysts with extremely high catalytic activity. *J. Mater. Chem. A* **7**, 13142-13148 (2019).
13. Ji, S. et al. Construction of a single-atom palladium catalyst by electronic metal-support interaction and interface confinement effect with remarkable performance in Suzuki coupling reaction. *Chem. Eng. J.* **452**, 139205 (2023).
14. Chen, Z. et al. A heterogeneous single-atom palladium catalyst surpassing homogeneous systems for Suzuki coupling. *Nat. Nanotechnol.* **13**, 702-707 (2018).
15. Tao, X. et al. Anchoring positively charged Pd single atoms in ordered porous ceria to boost



- catalytic activity and stability in Suzuki coupling reactions. *Small*. **16**, 2001782 (2020).
16. Liu, J. et al. Molecular engineered palladium single atom catalysts with an M-C<sub>1</sub>N<sub>3</sub> subunit for Suzuki coupling. *Journal of Materials Chemistry A*. **9**, 11427-11432 (2021).
17. Fu, N. et al. Fabricating Pd isolated single atom sites on C<sub>3</sub>N<sub>4</sub>/rGO for heterogenization of homogeneous catalysis. *Nano Research*. **13**, 947-951 (2020).

## Analysis of the NMR data

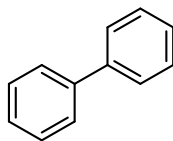

**1,1'-biphenyl (4a).** The compound was prepared in 99% yield when X=I, Br and Cl.  $^1\text{H}$  NMR (500 MHz, Chloroform-*d*)  $\delta$  [ppm] 7.65-7.56 (m, 4H), 7.45 (dd,  $J$  = 8.4, 7.0 Hz, 4H), 7.39-7.31 (m, 2H);  $^{13}\text{C}$  NMR (125 MHz, Chloroform-*d*)  $\delta$  [ppm] 141.21, 128.72, 127.14.

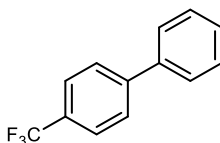

**4-(trifluoromethyl)-1,1'-biphenyl (4b).** The compound was prepared in 99% yield.  $^1\text{H}$  NMR (500 MHz, Chloroform-*d*)  $\delta$  [ppm] 7.70 (s, 4H), 7.62-7.60 (m, 2H), 7.49-7.45 (m, 2H), 7.41-7.33 (m, 1H);  $^{13}\text{C}$  NMR (125 MHz, Chloroform-*d*)  $\delta$  [ppm] 144.71, 139.75, 128.96, 128.73, 128.16, 127.40, 127.26, 127.15, 125.67.  $^{19}\text{F}$  NMR (471 MHz, Chloroform-*d*)  $\delta$  [ppm] -62.39.

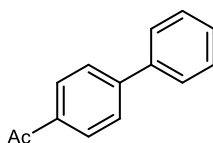

**1-([1,1'-biphenyl]-4-yl) ethan-1-one (4c).** The compound was prepared in 98% yield when X=I and Br.  $^1\text{H}$  NMR (400 MHz, Chloroform-*d*)  $\delta$  [ppm] 8.07-8.01 (m, 2H), 7.72-7.67 (m, 2H), 7.66-7.60 (m, 2H), 7.52-7.44 (m, 2H), 7.44-7.38 (m, 1H), 2.64 (s, 3H);  $^{13}\text{C}$  NMR (125 MHz, Chloroform-*d*)  $\delta$  [ppm] 197.74, 145.75, 139.84, 135.82, 128.93, 128.89, 128.20, 127.24, 127.19, 26.64.

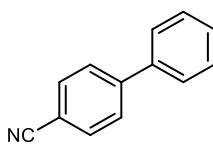

**[1,1'-biphenyl]-4-carbonitrile (4d).** The compound was prepared in 99% yield when X=I, Br and Cl.  $^1\text{H}$  NMR (500 MHz, Chloroform-*d*)  $\delta$  [ppm] 7.78-7.71 (m, 2H), 7.71-7.66 (m, 2H), 7.61-7.57 (m, 2H), 7.49 (dd,  $J$  = 10.4, 4.8 Hz, 2H), 7.45-7.41 (m, 1H);  $^{13}\text{C}$  NMR (125 MHz, Chloroform-*d*)  $\delta$  [ppm] 145.68, 139.18, 132.59, 129.10, 128.64, 127.73, 127.22, 118.93, 110.91.

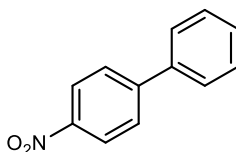

**4-nitro-1,1'-biphenyl (4e).** The compound was prepared in 99%, 99% and 93% yield when X=I, Br and Cl, respectively.  $^1\text{H}$  NMR (500 MHz, Chloroform-*d*)  $\delta$  [ppm] 8.30 (d,  $J$  = 8.9 Hz, 2H), 7.79-7.70 (m, 2H), 7.67-7.59 (m, 2H), 7.55-7.47 (m, 2H), 7.47-7.42 (m, 1H);  $^{13}\text{C}$  NMR (125 MHz, Chloroform-

d)  $\delta$  [ppm] 147.60, 147.05, 138.74, 129.12, 128.88, 127.77, 127.35, 124.07.

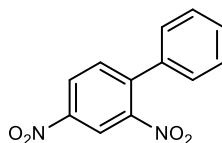

**2,4-dinitro-1,1'-biphenyl (4f).** The compound was prepared in 99% yield when X=I and Cl. **<sup>1</sup>H NMR** (500 MHz, Chloroform-*d*)  $\delta$  [ppm] 8.74-8.68 (m, 1H), 8.47 (ddd, *J* = 8.5, 2.3, 1.1 Hz, 1H), 7.73-7.64 (m, 1H), 7.53-7.44 (m, 3H), 7.40-7.30 (m, 2H); **<sup>13</sup>C NMR** (125 MHz, Chloroform-*d*)  $\delta$  [ppm] 149.03, 146.80, 142.21, 135.16, 133.19, 129.52, 129.05, 127.63, 126.44, 119.67.

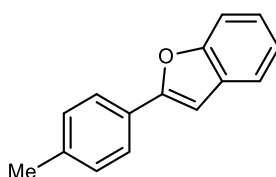

**2-(p-tolyl) benzofuran (4g).** The compound was prepared in 99% yield when X=I and Br. **<sup>1</sup>H NMR** (500 MHz, Chloroform-*d*)  $\delta$  [ppm] 7.87 (d, *J* = 8.2 Hz, 2H), 7.69-7.60 (m, 2H), 7.41-7.30 (m, 4H), 7.06 (s, 1H), 2.50 (s, 3H); **<sup>13</sup>C NMR** (125 MHz, Chloroform-*d*)  $\delta$  [ppm] 156.16, 154.74, 138.54, 129.45, 129.32, 127.72, 124.85, 123.96, 122.82, 120.71, 111.05, 100.53, 21.34.

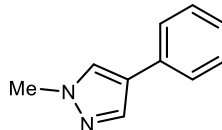

**1-methyl-4-phenyl-1H-pyrazole (4h).** The compound was prepared in 89% yield. **<sup>1</sup>H NMR** (500 MHz, Chloroform-*d*)  $\delta$  [ppm] 7.76 (d, *J* = 0.8 Hz, 1H), 7.60 (d, *J* = 0.7 Hz, 1H), 7.50 – 7.44 (m, 2H), 7.40 – 7.32 (m, 2H), 7.25 – 7.19 (m, 1H), 3.94 (s, 3H); **<sup>13</sup>C NMR** (125 MHz, Chloroform-*d*)  $\delta$  [ppm] 136.73, 132.61, 128.82, 126.86, 126.32, 125.48, 123.23, 39.07.

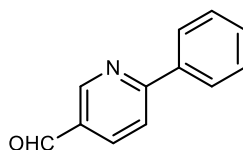

**6-phenylnicotinaldehyde (4i).** The compound was prepared in 93% yield. **<sup>1</sup>H NMR** (500 MHz, Chloroform-*d*)  $\delta$  [ppm] 10.13 (s, 1H), 9.13 (d, *J* = 2.1 Hz, 1H), 8.22 (dd, *J* = 8.2, 2.2 Hz, 1H), 8.11-8.05 (m, 2H), 7.90 (d, *J* = 8.2 Hz, 1H), 7.55-7.47 (m, 3H); **<sup>13</sup>C NMR** (125 MHz, Chloroform-*d*)  $\delta$  [ppm] 190.44, 162.18, 152.37, 137.94, 136.50, 130.36, 129.82, 128.97, 127.52, 120.58.

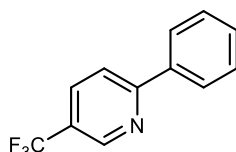

**2-phenyl-5-(trifluoromethyl) pyridine (4j).** The compound was prepared in 89% yield.  $^1\text{H}$  NMR (500 MHz, Chloroform-*d*)  $\delta$  [ppm] 8.98-8.93 (m, 1H), 8.07-8.01 (m, 2H), 7.98 (dd,  $J = 8.3, 2.4$  Hz, 1H), 7.85 (d,  $J = 8.3$  Hz, 1H), 7.55-7.45 (m, 3H);  $^{13}\text{C}$  NMR (125 MHz, Chloroform-*d*)  $\delta$  [ppm] 160.66, 146.60, 137.93, 133.92, 130.04, 128.95, 127.25, 124.94, 124.82, 124.67, 122.66, 119.94.  $^{19}\text{F}$  NMR (471 MHz, Chloroform-*d*)  $\delta$  [ppm] -62.24.

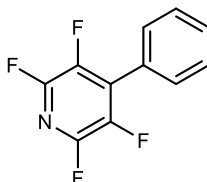

**2,3,5,6-tetrafluoro-4-phenylpyridine (4k).** The compound was prepared in 92% yield.  $^1\text{H}$  NMR (500 MHz, Chloroform-*d*)  $\delta$  [ppm] 7.54-7.47 (m, 5H);  $^{13}\text{C}$  NMR (125 MHz, Chloroform-*d*)  $\delta$  [ppm] 145.41, 143.42, 141.30, 139.31, 136.49, 136.26, 134.26, 129.84, 129.82, 127.07.  $^{19}\text{F}$  NMR (471 MHz, Chloroform-*d*)  $\delta$  [ppm] -94.28, -94.34 (d,  $J = 6.9$  Hz), -94.39, -145.48 – -145.51 (m), -145.54 – -145.57 (m).

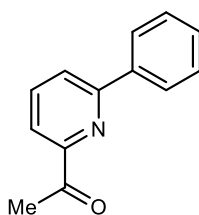

**1-(6-phenylpyridin-2-yl) ethan-1-one (4l).** The compound was prepared in 98% yield.  $^1\text{H}$  NMR (500 MHz, Chloroform-*d*)  $\delta$  [ppm] 8.10 (dd,  $J = 7.2, 1.7$  Hz, 2H), 7.96 (dd,  $J = 7.5, 1.2$  Hz, 1H), 7.92-7.82 (m, 2H), 7.51 (dd,  $J = 8.3, 6.5$  Hz, 2H), 7.47-7.42 (m, 1H), 2.82 (s, 3H);  $^{13}\text{C}$  NMR 200.41, 156.28, 153.23, 138.25, 137.50, 129.35, 128.74, 126.76, 123.30, 119.65, 25.66.

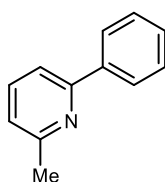

**2-methyl-6-phenylpyridine (4m).** The compound was prepared in 91% yield.  $^1\text{H}$  NMR (500 MHz, Chloroform-*d*)  $\delta$  [ppm] 8.09-7.95 (m, 2H), 7.62 (t,  $J = 7.7$  Hz, 1H), 7.54-7.45 (m, 3H), 7.42 (d,  $J = 7.4$  Hz, 1H), 7.09 (d,  $J = 7.6$  Hz, 1H), 2.65 (s, 3H);  $^{13}\text{C}$  NMR (125 MHz, Chloroform-*d*)  $\delta$  [ppm] 158.20, 156.82, 139.63, 136.77, 128.59, 128.56, 126.89, 121.48, 117.50, 24.63.

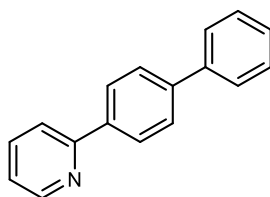

**2-([1,1'-biphenyl]-4-yl) pyridine (4n).** The compound was prepared in 99% yield.  $^1\text{H}$  NMR (500 MHz,

Chloroform-*d*)  $\delta$  [ppm] 8.81-8.67 (m, 1H), 8.19-8.05 (m, 2H), 7.80-7.74 (m, 3H), 7.74-7.65 (m, 3H), 7.48 (dd, *J* = 8.4, 7.0 Hz, 2H), 7.44-7.35 (m, 1H), 7.27-7.20 (m, 1H);  $^{13}\text{C}$  NMR (125 MHz, Chloroform-*d*)  $\delta$  [ppm] 156.82, 149.54, 141.60, 140.42, 138.06, 136.71, 128.73, 127.43, 127.35, 127.21, 126.98, 122.02, 120.35.

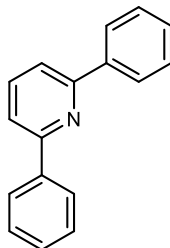

**2,6-diphenylpyridine (4o).** The compound was prepared in 99% yield.  $^1\text{H}$  NMR (500 MHz, Chloroform-*d*)  $\delta$  [ppm] 8.23-8.11 (m, 4H), 7.83 (td, *J* = 7.6, 3.0 Hz, 1H), 7.71 (td, *J* = 7.6, 3.5 Hz, 2H), 7.52 (qd, *J* = 7.5, 2.3 Hz, 4H), 7.47-7.41 (m, 2H);  $^{13}\text{C}$  NMR 156.81, 139.47, 137.46, 128.95, 128.66, 126.97, 118.62.

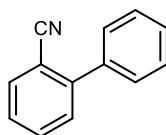

**[1,1'-biphenyl]-2-carbonitrile (4p).** The compound was prepared in 99% yield.  $^1\text{H}$  NMR (500 MHz, Chloroform-*d*)  $\delta$  [ppm] 7.77 (dd, *J* = 7.8, 1.3 Hz, 1H), 7.65 (td, *J* = 7.7, 1.3 Hz, 1H), 7.59 – 7.55 (m, 2H), 7.54 – 7.42 (m, 5H);  $^{13}\text{C}$  NMR (125 MHz, Chloroform-*d*)  $\delta$  [ppm] 145.42, 138.06, 133.69, 132.76, 130.02, 128.69, 128.66, 127.48, 118.67, 111.20.

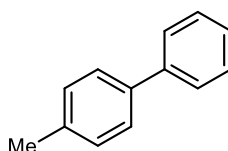

**4-methyl-1,1'-biphenyl (4q).** The compound was prepared in 99% yield when X=I and Br.  $^1\text{H}$  NMR (500 MHz, Chloroform-*d*)  $\delta$  [ppm] 7.59 (dd, *J* = 8.2, 1.3 Hz, 2H), 7.50 (d, *J* = 8.1 Hz, 2H), 7.43 (t, *J* = 7.7 Hz, 2H), 7.37-.31 (m, 1H), 7.28-7.24 (m, 2H), 2.41 (s, 3H);  $^{13}\text{C}$  NMR (125 MHz, Chloroform-*d*)  $\delta$  [ppm] 141.13, 138.33, 136.99, 129.45, 128.68, 126.97, 126.94, 21.08.

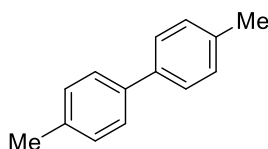

**4,4'-dimethyl-1,1'-biphenyl (4r).** The compound was prepared in 99% yield.  $^1\text{H}$  NMR (500 MHz, Chloroform-*d*)  $\delta$  [ppm] 7.63-7.55 (m, 4H), 7.38-7.30 (m, 4H), 2.49 (s, 6H);  $^{13}\text{C}$  NMR (125 MHz, Chloroform-*d*)  $\delta$  [ppm] 138.24, 136.62, 129.39, 126.76, 21.04.

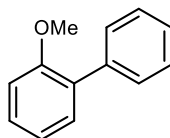

**2-methoxy-1,1'-biphenyl (4s).** The compound was prepared in 80% yield.  $^1\text{H}$  NMR (400 MHz, Chloroform-*d*)  $\delta$  [ppm] 7.60-7.54 (m, 2H), 7.48-7.41 (m, 2H), 7.39-7.32 (m, 3H), 7.11-6.99 (m, 2H), 3.84 (s, 3H);  $^{13}\text{C}$  NMR (125 MHz, Chloroform-*d*)  $\delta$  [ppm] 156.42, 138.51, 130.86, 130.69, 129.51, 128.57, 127.94, 126.87, 120.79, 111.19, 55.50.

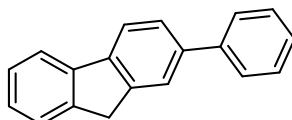

**2-phenyl-9H-fluorene (4t).** The compound was prepared in 99% yield.  $^1\text{H}$  NMR (500 MHz, Chloroform-*d*)  $\delta$  [ppm] 7.93-7.75 (m, 3H), 7.67 (d,  $J$  = 8.1 Hz, 2H), 7.63 (d,  $J$  = 7.7 Hz, 1H), 7.57 (d,  $J$  = 7.4 Hz, 1H), 7.47 (dd,  $J$  = 8.3, 7.1 Hz, 2H), 7.43-7.29 (m, 3H), 3.98 (s, 2H);  $^{13}\text{C}$  NMR (125 MHz, Chloroform-*d*)  $\delta$  [ppm] 143.85, 143.43, 141.46, 141.36, 140.89, 139.83, 128.74, 127.15, 127.08, 126.79, 126.70, 125.97, 125.02, 123.77, 120.08, 119.93, 36.98.

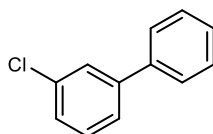

**3-chloro-1,1'-biphenyl (4u).** The compound was prepared in 99% yield.  $^1\text{H}$  NMR (500 MHz, Chloroform-*d*)  $\delta$  [ppm] 7.68-7.59 (m, 3H), 7.50 (ddd,  $J$  = 9.9, 6.8, 1.8 Hz, 3H), 7.47-7.34 (m, 3H);  $^{13}\text{C}$  NMR (125 MHz, Chloroform-*d*)  $\delta$  [ppm] 142.99, 139.72, 134.59, 129.92, 128.84, 127.80, 127.22, 127.20, 127.04, 125.23.

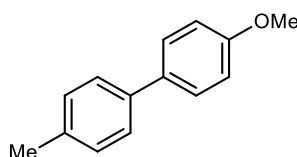

**4-methoxy-4'-methyl-1,1'-biphenyl (4v).** The compound was prepared in 99% yield.  $^1\text{H}$  NMR (500 MHz, Chloroform-*d*)  $\delta$  [ppm] 7.59 (d,  $J$  = 8.8 Hz, 2H), 7.53 (d,  $J$  = 8.2 Hz, 2H), 7.30 (d,  $J$  = 7.5 Hz, 2H), 7.04 (d,  $J$  = 8.8 Hz, 2H), 3.90 (s, 3H), 2.46 (s, 3H);  $^{13}\text{C}$  NMR (125 MHz, Chloroform-*d*)  $\delta$  [ppm] 158.86, 137.88, 136.25, 133.64, 129.38, 127.87, 126.50, 114.08, 55.21, 20.99.

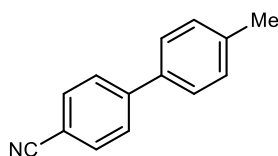

**2-methyl-6-(phenylethynyl) pyridine (4w).** The compound was prepared in 99% yield.  $^1\text{H}$  NMR (500 MHz, Chloroform-*d*)  $\delta$  [ppm] 7.76-7.61 (m, 4H), 7.50 (d,  $J$  = 8.1 Hz, 2H), 7.30 (d,  $J$  = 8.0 Hz, 2H), 2.42 (s, 3H);  $^{13}\text{C}$  NMR (125 MHz, Chloroform-*d*)  $\delta$  [ppm] 145.48, 138.65, 136.13, 132.45, 129.74, 127.34,

126.95, 118.96, 110.42, 21.10.

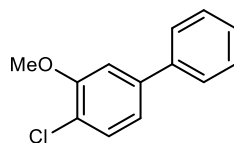

**4-chloro-3-methoxy-1,1'-biphenyl (4x).** The compound was prepared in 90% yield. **<sup>1</sup>H NMR** (400 MHz, Chloroform-*d*)  $\delta$  [ppm] 7.52-7.47 (m, 2H), 7.45-7.38 (m, 2H), 7.37-7.32 (m, 1H), 7.27-7.23 (m, 1H), 7.03 (dd, *J* = 8.1, 2.0 Hz, 1H), 6.98 (d, *J* = 2.0 Hz, 1H), 3.81 (s, 3H); **<sup>13</sup>C NMR** (125 MHz, Chloroform-*d*)  $\delta$  [ppm] 156.97, 137.46, 133.88, 131.50, 129.38, 129.22, 128.06, 127.19, 120.81, 111.85, 55.75.

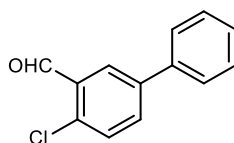

**4-chloro-[1,1'-biphenyl]-3-carbaldehyde (4y).** The compound was prepared in 75% yield. **<sup>1</sup>H NMR** (400 MHz, Chloroform-*d*)  $\delta$  [ppm] 10.53 (s, 1H), 8.15 (d, *J* = 2.4 Hz, 1H), 7.76 (dd, *J* = 8.3, 2.4 Hz, 1H), 7.63-7.57 (m, 2H), 7.53 (d, *J* = 8.3 Hz, 1H), 7.50-7.43 (m, 2H), 7.43-7.36 (m, 1H); **<sup>13</sup>C NMR** (125 MHz, Chloroform-*d*)  $\delta$  [ppm] 189.78, 140.52, 138.61, 136.82, 133.47, 132.53, 130.98, 129.04, 128.23, 127.62, 126.93.

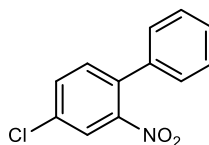

**4-chloro-2-nitro-1,1'-biphenyl (4z).** The compound was prepared in 81% yield. **<sup>1</sup>H NMR** (500 MHz, Chloroform-*d*)  $\delta$  [ppm] 7.86 (dd, *J* = 3.4, 2.3 Hz, 1H), 7.68 (d, *J* = 8.6 Hz, 1H), 7.60 (dd, *J* = 8.3, 2.2 Hz, 1H), 7.44-7.41 (m, 2H), 7.41-7.38 (m, 1H), 7.30-7.25 (m, 2H); **<sup>13</sup>C NMR** (125 MHz, Chloroform-*d*)  $\delta$  [ppm] 135.94, 133.31, 132.99, 132.36, 128.79, 128.54, 127.80, 125.77, 124.20.

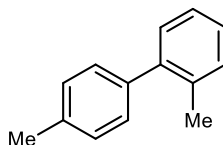

**2,4'-dimethyl-1,1'-biphenyl (4aa).** The compound was prepared in 99% yield. **<sup>1</sup>H NMR** (500 MHz, Chloroform-*d*)  $\delta$  [ppm] 7.42-7.22 (m, 8H), 2.56-2.43 (m, 3H), 2.42-2.26 (m, 3H); **<sup>13</sup>C NMR** (125 MHz, Chloroform-*d*)  $\delta$  [ppm] 141.84, 138.99, 136.31, 135.34, 130.23, 129.81, 129.03, 128.73, 127.02, 125.70, 21.14, 20.48.

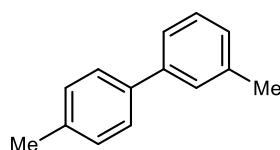

**3,4'-dimethyl-1,1'-biphenyl (4ab).** The compound was prepared in 99% yield.  $^1\text{H}$  NMR (500 MHz, Chloroform-*d*)  $\delta$  [ppm] 7.60 (d, *J* = 8.2 Hz, 2H), 7.50 (d, *J* = 12.4 Hz, 2H), 7.43 (t, *J* = 7.6 Hz, 1H), 7.35 (d, *J* = 7.8 Hz, 2H), 7.26 (t, *J* = 8.1 Hz, 1H), 2.53 (s, 3H), 2.50 (s, 3H);  $^{13}\text{C}$  NMR (125 MHz, Chloroform-*d*)  $\delta$  [ppm] 141.11, 138.42, 138.19, 136.83, 129.37, 128.58, 127.73, 127.67, 126.95, 124.04, 21.51, 21.05.

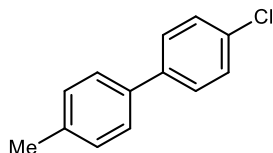

**4-chloro-4'-methyl-1,1'-biphenyl (4ac).** The compound was prepared in 99% yield when X=I and Br.  $^1\text{H}$  NMR (500 MHz, Chloroform-*d*)  $\delta$  [ppm] 7.49 (ddd, *J* = 18.6, 8.0, 1.8 Hz, 3H), 7.38 – 7.28 (m, 3H), 7.27 – 7.15 (m, 2H), 2.46 (s, 3H);  $^{13}\text{C}$  NMR (125 MHz, Chloroform-*d*)  $\delta$  [ppm] 139.53, 137.37, 137.04, 132.98, 129.55, 128.80, 128.12, 126.75, 21.06.

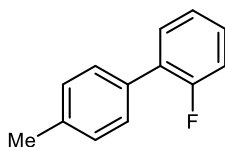

**2-fluoro-4'-methyl-1,1'-biphenyl (4ad).** The compound was prepared in 99% yield when X=I and Br.  $^1\text{H}$  NMR (400 MHz, Chloroform-*d*)  $\delta$  [ppm] 7.50-7.40 (m, 3H), 7.34-7.24 (m, 3H), 7.23-7.11 (m, 2H), 2.42 (s, 3H);  $^{13}\text{C}$  NMR (125 MHz, Chloroform-*d*)  $\delta$  [ppm] 159.77 (d, *J* = 245.8 Hz), 137.46, 132.86, 130.65 (d, *J* = 3.5 Hz), 129.14, 128.86 (d, *J* = 2.7 Hz), 128.67, 128.60, 124.26 (d, *J* = 3.6 Hz), 116.02 (d, *J* = 22.7 Hz), 21.18.  $^{19}\text{F}$  NMR (377 MHz, Chloroform-*d*)  $\delta$  [ppm] -118.05.

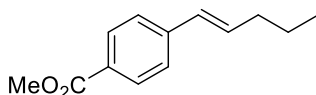

**methyl (E)-4-(pent-1-en-1-yl) benzoate (5a).** The compound was prepared in 93% yield.  $^1\text{H}$  NMR (400 MHz, Chloroform-*d*)  $\delta$  [ppm] 8.00-7.91 (m, 2H), 7.41-7.36 (m, 2H), 6.46-6.30 (m, 2H), 3.90 (s, 3H), 2.22 (td, *J* = 7.4, 5.9 Hz, 2H), 1.57-1.46 (m, 2H), 0.96 (t, *J* = 7.4 Hz, 3H);  $^{13}\text{C}$  NMR (125 MHz, Chloroform-*d*)  $\delta$  [ppm] 167.01, 142.45, 133.98, 129.86, 129.16, 128.21, 125.73, 51.97, 35.18, 22.33, 13.72.

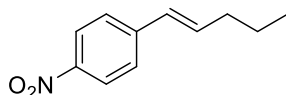

**(E)-1-nitro-4-(pent-1-en-1-yl) benzene (5b).** The compound was prepared in 93% yield.  $^1\text{H}$  NMR (400 MHz, Chloroform-*d*)  $\delta$  [ppm] 8.20-8.10 (m, 2H), 7.47-7.42 (m, 2H), 6.50-6.36 (m, 2H), 2.32-2.15 (m, 2H), 1.58-1.47 (m, 2H), 0.97 (t, *J* = 7.4 Hz, 3H);  $^{13}\text{C}$  NMR (125 MHz, Chloroform-*d*)  $\delta$  [ppm] 146.38, 144.42, 136.40, 128.24, 126.30, 123.94, 35.22, 22.16, 13.70.

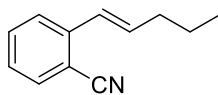



**(E)-2-(pent-1-en-1-yl) benzonitrile (5c).** The compound was prepared in 88% yield. <sup>1</sup>H NMR (500 MHz, Chloroform-*d*)  $\delta$  [ppm] 7.64-7.56 (m, 2H), 7.53-7.48 (m, 1H), 7.28-7.24 (m, 1H), 6.79-6.71 (m, 1H), 6.50-6.40 (m, 1H), 2.27 (ddd, *J* = 14.6, 7.2, 1.5 Hz, 2H), 1.56-1.50 (m, 2H), 0.98 (t, *J* = 7.4 Hz, 3H); <sup>13</sup>C NMR (125 MHz, Chloroform-*d*)  $\delta$  [ppm] 141.24, 136.60, 132.87, 132.56, 126.87, 126.08, 125.36, 118.11, 110.47, 35.19, 22.23, 13.68.

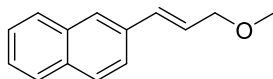

**(E)-2-(3-methoxyprop-1-en-1-yl) naphthalene (5d).** The compound was prepared in 50% yield. <sup>1</sup>H NMR (400 MHz, Chloroform-*d*)  $\delta$  [ppm] 7.84-7.77 (m, 3H), 7.75 (s, 1H), 7.62 (dd, *J* = 8.6, 1.7 Hz, 1H), 7.53-7.40 (m, 2H), 6.79 (d, *J* = 16.0 Hz, 1H), 6.42 (dt, *J* = 15.9, 6.0 Hz, 1H), 4.16 (dd, *J* = 6.0, 1.4 Hz, 2H), 3.43 (s, 3H); <sup>13</sup>C NMR (125 MHz, Chloroform-*d*)  $\delta$  [ppm] 134.16, 133.54, 133.01, 132.49, 128.17, 127.96, 127.63, 126.44, 126.32, 126.23, 125.87, 123.55, 73.14, 58.04.

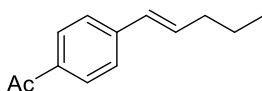

**(E)-1-(4-(pent-1-en-1-yl) phenyl) ethan-1-one (5e).** The compound was prepared in 99% yield. <sup>1</sup>H NMR (400 MHz, Chloroform-*d*)  $\delta$  [ppm] 7.94 – 7.84 (m, 2H), 7.45 – 7.37 (m, 2H), 6.47 – 6.25 (m, 2H), 2.58 (s, 3H), 2.22 (td, *J* = 7.4, 5.8 Hz, 2H), 1.52 (dq, *J* = 14.6, 7.4 Hz, 2H), 0.96 (t, *J* = 7.4 Hz, 3H); <sup>13</sup>C NMR (125 MHz, Chloroform-*d*)  $\delta$  [ppm] 197.61, 142.66, 135.40, 134.31, 129.09, 128.73, 125.91, 35.21, 26.53, 22.31, 13.73.

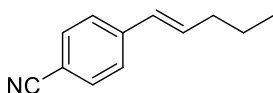

**(E)-4-(pent-1-en-1-yl) benzonitrile (5f).** The compound was prepared in 70% yield. <sup>1</sup>H NMR (500 MHz, Chloroform-*d*)  $\delta$  [ppm] 7.61-7.51 (m, 2H), 7.46-7.34 (m, 2H), 6.45-6.29 (m, 2H), 2.26-2.19 (m, 2H), 1.57-1.45 (m, 2H), 0.96 (t, *J* = 7.4 Hz, 3H); <sup>13</sup>C NMR (125 MHz, Chloroform-*d*)  $\delta$  [ppm] 142.38, 135.30, 132.28, 128.55, 126.33, 119.12, 109.87, 35.11, 22.19, 13.67.

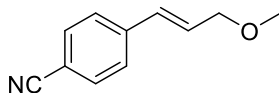

**(E)-4-(3-methoxyprop-1-en-1-yl) benzonitrile (5g).** The compound was prepared in 81% yield. <sup>1</sup>H NMR (400 MHz, Chloroform-*d*)  $\delta$  [ppm] 7.62-7.54 (m, 2H), 7.47-7.42 (m, 2H), 6.68-6.54 (m, 1H), 6.39 (dt, *J* = 16.0, 5.5 Hz, 1H), 4.11 (dd, *J* = 5.5, 1.6 Hz, 2H), 3.40 (s, 3H); <sup>13</sup>C NMR (125 MHz, Chloroform-*d*)  $\delta$  [ppm] 141.20, 132.34, 130.13, 129.93, 126.83, 118.86, 110.74, 72.44, 58.31.

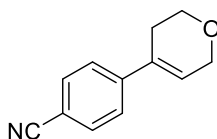

**4-(3,6-dihydro-2H-pyran-4-yl) benzonitrile (5h).** The compound was prepared in 87% yield. <sup>1</sup>H NMR (500 MHz, Chloroform-*d*)  $\delta$  [ppm] 7.65-7.56 (m, 2H), 7.50-7.43 (m, 2H), 6.27 (dq, *J* = 4.5, 1.5 Hz, 1H), 4.34 (q, *J* = 2.8 Hz, 2H), 3.93 (t, *J* = 5.4 Hz, 2H), 2.50 (ddq, *J* = 5.4, 4.5, 2.7 Hz, 2H); <sup>13</sup>C NMR (125 MHz, Chloroform-*d*)  $\delta$  [ppm] 144.44, 132.89, 132.24, 125.89, 125.16, 118.87, 110.61, 65.71, 64.12, 26.75.

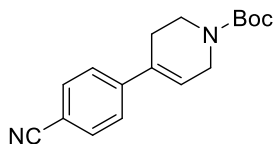

**tert-butyl 4-(4-cyanophenyl)-3,6-dihydropyridine-1(2H)-carboxylate (5i).** The compound was prepared in 99% yield. <sup>1</sup>H NMR (500 MHz, Chloroform-*d*)  $\delta$  [ppm] 7.63-7.54 (m, 2H), 7.44 (d, *J* = 8.4 Hz, 2H), 6.15 (s, 1H), 4.30-3.95 (m, 2H), 3.63 (t, *J* = 5.7 Hz, 2H), 2.64-2.36 (m, 2H), 1.47 (s, 9H); <sup>13</sup>C NMR (125 MHz, Chloroform-*d*)  $\delta$  [ppm] 154.61, 144.87, 134.11, 132.18, 125.37, 124.19, , 118.80, 110.53, 79.83, 43.60, 28.36, 26.97.

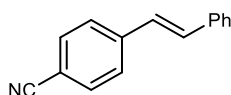

**(E)-4-styrylbenzonitrile (5j).** The compound was prepared in 99% yield. <sup>1</sup>H NMR (400 MHz, Chloroform-*d*)  $\delta$  [ppm] 7.67-7.60 (m, 2H), 7.60-7.51 (m, 4H), 7.43-7.36 (m, 2H), 7.36-7.29 (m, 1H), 7.21 (d, *J* = 16.3 Hz, 1H), 7.09 (d, *J* = 16.3 Hz, 1H); <sup>13</sup>C NMR (125 MHz, Chloroform-*d*)  $\delta$  [ppm] 141.75, 136.21, 132.41, 132.33, 128.79, 128.58, 126.85, 126.79, 126.64, 118.97, 110.48.

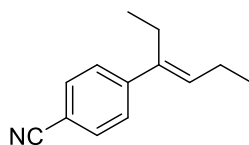

**(E)-4-(hex-3-en-3-yl) benzonitrile (5k).** The compound was prepared in 99% yield. <sup>1</sup>H NMR (500 MHz, Chloroform-*d*)  $\delta$  [ppm] 7.62 – 7.51 (m, 2H), 7.47 – 7.39 (m, 2H), 5.74 (t, *J* = 7.3 Hz, 1H), 2.51 (q, *J* = 7.5 Hz, 2H), 2.23 (p, *J* = 7.5 Hz, 2H), 1.07 (t, *J* = 7.5 Hz, 3H), 0.97 (t, *J* = 7.6 Hz, 3H); <sup>13</sup>C NMR (125 MHz, Chloroform-*d*)  $\delta$  [ppm] 147.64, 139.71, 133.11, 132.00, 126.74, 119.16, 109.79, 22.42, 21.81, 14.16, 13.51..

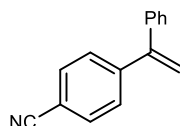

**4-(1-phenylvinyl) benzonitrile (5l).** The compound was prepared in 99% yield. <sup>1</sup>H NMR (400 MHz, Chloroform-*d*)  $\delta$  [ppm] 7.66-7.59 (m, 2H), 7.48-7.41 (m, 2H), 7.40-7.32 (m, 3H), 7.32-7.24 (m, 2H), 5.57 (dd, *J* = 17.3, 0.7 Hz, 2H); <sup>13</sup>C NMR (125 MHz, Chloroform-*d*)  $\delta$  [ppm] 148.64, 146.02, 140.14, 132.02, 128.79, 128.41, 128.21, 128.10, 118.81, 116.68, 111.28.

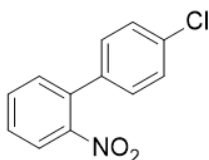

**4'-chloro-2-nitro-1,1'-biphenyl (4ae).**  $^1\text{H}$  NMR (500 MHz,  $\text{CDCl}_3$ )  $\delta$  7.91 (dd,  $J = 8.1, 1.3$  Hz, 1H), 7.65 (td,  $J = 7.5, 1.3$  Hz, 1H), 7.53 (ddd,  $J = 8.0, 7.4, 1.5$  Hz, 1H), 7.47 – 7.35 (m, 3H), 7.28 (d,  $J = 8.3$  Hz, 2H).  $^{13}\text{C}$  NMR (126 MHz,  $\text{CDCl}_3$ )  $\delta$  149.09, 135.94, 135.23, 134.48, 132.53, 131.87, 129.30, 128.93, 128.60, 124.29.

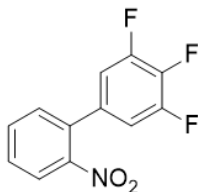

**3',4',5'-trifluoro-2-nitro-1,1'-biphenyl (4af).**  $^1\text{H}$  NMR (500 MHz,  $\text{CDCl}_3$ )  $\delta$  7.96 (dd,  $J = 8.1, 1.3$  Hz, 1H), 7.69 (td,  $J = 7.6, 1.3$  Hz, 1H), 7.62 – 7.56 (m, 1H), 7.41 (dd,  $J = 7.6, 1.5$  Hz, 1H), 7.04 – 6.92 (m, 2H).  $^{13}\text{C}$  NMR (126 MHz,  $\text{CDCl}_3$ )  $\delta$  151.14 (ddd,  $J = 251.3, 10.1, 4.2$  Hz), 148.72, 139.78 (td,  $J = 251.3, 15.0$  Hz), 133.54, 132.82, 131.67, 129.41, 124.54, 112.61 (d,  $J = 22.5$  Hz), 112.61 (d,  $J = 11.2$  Hz).  $^{19}\text{F}$  NMR (471 MHz,  $\text{CDCl}_3$ )  $\delta$  -133.43 (d,  $J = 20.1$  Hz), -160.54 (t,  $J = 20.8$  Hz).

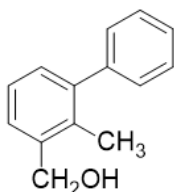

**(2-methyl-[1,1'-biphenyl]-3-yl) methanol (4ag).**  $^1\text{H}$  NMR (500 MHz,  $\text{CDCl}_3$ )  $\delta$  7.48 – 7.42 (m, 3H), 7.40 – 7.36 (m, 1H), 7.35 – 7.27 (m, 3H), 7.24 (dd,  $J = 7.6, 1.6$  Hz, 1H), 4.80 (s, 2H), 2.28 (s, 3H).  $^{13}\text{C}$  NMR (126 MHz,  $\text{CDCl}_3$ )  $\delta$  142.89, 142.07, 139.25, 133.62, 129.61, 129.40, 128.09, 126.83, 126.78, 125.62, 64.09, 15.91.

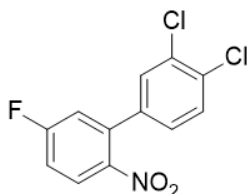

**3',4'-dichloro-5-fluoro-2-nitro-1,1'-biphenyl (4ah).**  $^1\text{H}$  NMR (500 MHz,  $\text{CDCl}_3$ )  $\delta$  8.04 (dd,  $J = 9.0, 5.0$  Hz, 1H), 7.53 (d,  $J = 8.2$  Hz, 1H), 7.44 (d,  $J = 2.1$  Hz, 1H), 7.24 (ddd,  $J = 9.0, 7.3, 2.7$  Hz, 1H), 7.15 (dd,  $J = 8.2, 2.1$  Hz, 1H), 7.12 (dd,  $J = 8.5, 2.8$  Hz, 1H).  $^{13}\text{C}$  NMR (126 MHz,  $\text{CDCl}_3$ )  $\delta$  164.10 (d,  $J = 258$  Hz), 144.74, 137.32 (d,  $J = 10$  Hz), 136.55, 133.14 (d,  $J = 22.5$  Hz), 130.73, 129.69, 127.43 (d,  $J = 8.8$  Hz), 127.13, 118.89 (d,  $J = 23.8$  Hz), 116.02 (d,  $J = 23.2$  Hz).  $^{19}\text{F}$  NMR (471 MHz,  $\text{CDCl}_3$ )  $\delta$  -103.57.

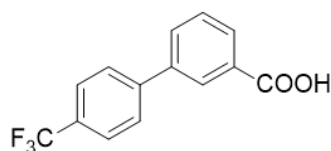

**4'-(trifluoromethyl)-[1,1'-biphenyl]-3-carboxylic acid (4ai).**  $^1\text{H}$  NMR (500 MHz, Methanol- $d_4$ )  $\delta$  8.34 (t,  $J$  = 1.8 Hz, 1H), 8.09 (dt,  $J$  = 7.8, 1.4 Hz, 1H), 7.94 (ddd,  $J$  = 7.8, 2.0, 1.1 Hz, 1H), 7.92 – 7.86 (m, 2H), 7.80 (m, 2H), 7.63 (t,  $J$  = 7.7 Hz, 1H).  $^{13}\text{C}$  NMR (126 MHz, Methanol- $d_4$ )  $\delta$  168.03, 143.82, 139.76, 135.44, 131.45, 131.28, 129.39 (q,  $J$  = 32.5 Hz), 129.09, 128.95, 127.93, 127.28, 125.53 (q,  $J$  = 3.8 Hz), 124.37 (q,  $J$  = 270 Hz).  $^{19}\text{F}$  NMR (471 MHz,  $\text{CDCl}_3$ )  $\delta$  -64.02.

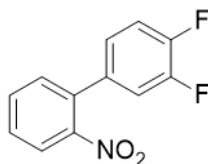

**3',4'-difluoro-2-nitro-1,1'-biphenyl (4aj).**  $^1\text{H}$  NMR (500 MHz,  $\text{CDCl}_3$ )  $\delta$  7.92 (dd,  $J$  = 8.1, 1.3 Hz, 1H), 7.66 (td,  $J$  = 7.5, 1.3 Hz, 1H), 7.55 (td,  $J$  = 7.8, 1.4 Hz, 1H), 7.43 (dd,  $J$  = 7.8, 1.4 Hz, 1H), 7.30 – 7.15 (m, 2H), 7.07 – 7.04 (m, 1H).  $^{13}\text{C}$  NMR (126 MHz,  $\text{CDCl}_3$ )  $\delta$  150.44 (dd,  $J$  = 248.8, 12.5 Hz), 150.16 (dd,  $J$  = 247.5, 12.5 Hz), 149.00, 134.35 (d,  $J$  = 3.8 Hz), 134.29, 132.62, 131.85, 128.93, 124.34, 124.29 (d,  $J$  = 3.8 Hz), 117.63 (d, 17.5 Hz), 117.34 (d, 17.5 Hz).  $^{19}\text{F}$  NMR (471 MHz,  $\text{CDCl}_3$ )  $\delta$  -136.93 (d,  $J$  = 21.0 Hz), -138.15 (d,  $J$  = 21.6 Hz).

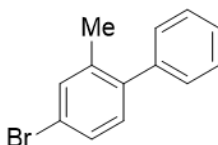

**4-bromo-2-methyl-1,1'-biphenyl (4ak).**  $^1\text{H}$  NMR (500 MHz,  $\text{CDCl}_3$ )  $\delta$  7.48 – 7.43 (m, 3H), 7.42 – 7.37 (m, 2H), 7.34 – 7.30 (m, 2H), 7.13 (d,  $J$  = 8.1 Hz, 1H), 2.28 (s, 3H).  $^{13}\text{C}$  NMR (126 MHz,  $\text{CDCl}_3$ )  $\delta$  140.89, 140.79, 137.67, 133.02, 131.33, 129.04, 128.82, 128.24, 127.15, 121.09, 20.34.

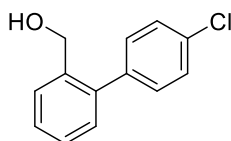

**(4'-chloro-[1,1'-biphenyl]-2-yl) methanol (4al).**  $^1\text{H}$  NMR (400 MHz, Chloroform- $d$ )  $\delta$  [ppm] 7.57-7.53 (m, 1H), 7.43-7.34 (m, 4H), 7.34-7.29 (m, 2H), 7.28-7.23 (m, 1H), 4.57 (s, 2H), 1.94 (s, 1H);  $^{13}\text{C}$  NMR (125 MHz, Chloroform- $d$ )  $\delta$  [ppm] 140.08, 138.98, 137.82, 133.31, 130.45, 129.91, 128.58, 128.35, 127.98, 127.76, 62.90.

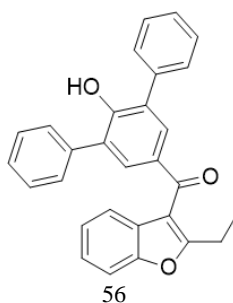

(2-ethylbenzofuran-3-yl) (2'-hydroxy-[1,1':3',1''-terphenyl]-5'-yl) methanone (4am). <sup>1</sup>H NMR (500 MHz, CDCl<sub>3</sub>) δ 7.88 (s, 2H), 7.61 – 7.57 (m, 5H), 7.54 – 7.48 (m, 5H), 7.45 – 7.41 (m, 2H), 7.35 – 7.26 (m, 2H), 6.00 (s, 1H), 3.02 (q, J = 7.5 Hz, 2H), 1.38 (t, J = 7.5 Hz, 3H). <sup>13</sup>C NMR (126 MHz, CDCl<sub>3</sub>) δ 190.49, 165.66, 153.65, 136.46, 131.95, 131.71, 129.32, 129.06, 128.92, 128.75, 128.20, 127.21, 124.37, 123.44, 121.32, 116.15, 111.06, 21.88, 12.44.

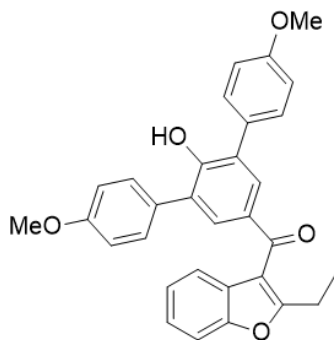

(2-ethylbenzofuran-3-yl) (2'-hydroxy-4,4''-dimethoxy-[1,1':3',1''-terphenyl]-5'-yl) methanone (4an). <sup>1</sup>H NMR (500 MHz, CDCl<sub>3</sub>) δ 7.83 (s, 2H), 7.62 – 7.58 (m, 1H), 7.54 – 7.49 (m, 4H), 7.39 – 7.25 (m, 2H), 7.08 – 7.00 (m, 4H), 6.03 (s, 1H), 3.86 (s, 6H), 3.01 (q, J = 7.6 Hz, 2H), 1.38 (t, J = 7.5 Hz, 3H). <sup>13</sup>C NMR (126 MHz, CDCl<sub>3</sub>) δ 190.66, 165.59, 159.50, 153.88, 153.70, 131.80, 131.29, 130.51, 128.68, 128.52, 127.26, 124.35, 123.42, 121.35, 116.20, 116.09, 114.48, 111.05, 55.36, 21.87, 12.44.

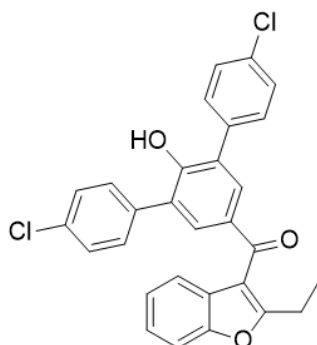

(4,4''-dichloro-2'-hydroxy-[1,1':3',1''-terphenyl]-5'-yl) (2-ethylbenzofuran-3-yl) methanone (4ao). <sup>1</sup>H NMR (500 MHz, CDCl<sub>3</sub>) δ 7.83 (s, 2H), 7.53 – 7.43 (m, 10H), 7.32 (ddd, J = 8.5, 7.3, 1.4 Hz, 1H), 7.28 – 7.23 (m, 1H), 3.00 (q, J = 7.5 Hz, 2H), 1.36 (t, J = 7.5 Hz, 3H). <sup>13</sup>C NMR (126 MHz, CDCl<sub>3</sub>) δ 190.16, 165.98, 153.71, 153.38, 134.67, 134.42, 132.16, 131.80, 130.66, 129.30, 127.92, 127.05, 124.47, 123.46, 121.17, 115.96, 111.18, 21.86, 12.40.

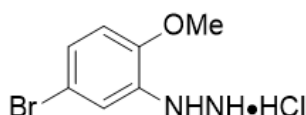

(5-bromo-2-methoxyphenyl) hydrazine. <sup>1</sup>H NMR (500 MHz, Methanol-d<sub>4</sub>) δ 7.31 – 7.16 (m, 2H), 6.98 (d, J = 8.6 Hz, 1H), 3.92 (s, 3H). <sup>13</sup>C NMR (126 MHz, Methanol-d<sub>4</sub>) δ 148.22, 134.99, 126.04, 117.85, 112.46, 55.23.

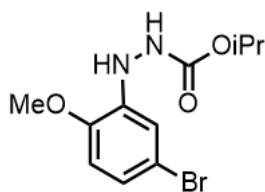

**isopropyl 2-(5-bromo-2-methoxyphenyl) hydrazine-1-carboxylate (1aa).**  $^1\text{H}$  NMR (500 MHz,  $\text{CDCl}_3$ )  $\delta$  6.98 (d,  $J$  = 2.4 Hz, 1H), 6.94 (dd,  $J$  = 8.5, 2.4 Hz, 1H), 6.67 (d,  $J$  = 8.5 Hz, 1H), 6.44 (s, 1H), 6.25 (s, 1H), 4.99 (p,  $J$  = 6.2 Hz, 1H), 3.85 (s, 3H), 1.42 – 1.04 (m, 6H).  $^{13}\text{C}$  NMR (126 MHz,  $\text{CDCl}_3$ )  $\delta$  156.50, 145.96, 138.91, 122.69, 114.95, 113.60, 111.52, 69.86, 55.77, 22.03.

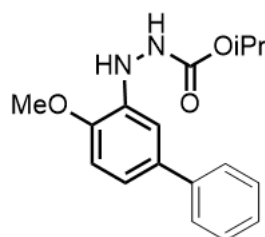

**isopropyl 2-(4-methoxy-[1,1'-biphenyl]-3-yl) hydrazine-1-carboxylate (bifenazate).**  $^1\text{H}$  NMR (500 MHz,  $\text{CDCl}_3$ )  $\delta$  7.58 – 7.54 (m, 2H), 7.42 (dd,  $J$  = 8.5, 7.0 Hz, 2H), 7.35 – 7.30 (m, 1H), 7.12 (d,  $J$  = 2.2 Hz, 1H), 7.10 (dd,  $J$  = 8.2, 2.3 Hz, 1H), 6.91 (d,  $J$  = 8.3 Hz, 1H), 6.46 (s, 1H), 6.32 (s, 1H), 4.99 (p,  $J$  = 6.2 Hz, 1H), 3.92 (s, 3H), 1.41 – 1.10 (m, 6H).  $^{13}\text{C}$  NMR (126 MHz,  $\text{CDCl}_3$ )  $\delta$  156.72, 146.64, 141.40, 137.75, 134.36, 128.63, 126.92, 126.67, 119.17, 111.11, 110.49, 69.62, 55.75, 22.06.

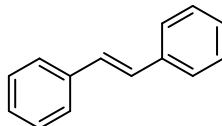

**(E)-1,2-diphenylethene (8a).** The compound was prepared in 99% yield.  $^1\text{H}$  NMR (500 MHz, Chloroform- $d$ )  $\delta$  [ppm] 7.54 (dd,  $J$  = 8.2, 1.3 Hz, 4H), 7.38 (dd,  $J$  = 8.5, 6.9 Hz, 4H), 7.30-7.26 (m, 2H), 7.13 (s, 2H);  $^{13}\text{C}$  NMR (125 MHz, Chloroform- $d$ )  $\delta$  [ppm] 137.29, 128.65, 127.59, 126.48.

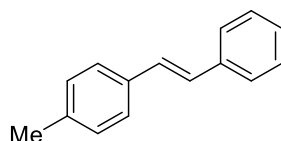

**(E)-1-methyl-4-styrylbenzene (8b).** The compound was prepared in 97% and 92% yield when  $X=\text{I}$  and  $\text{Br}$ , respectively.  $^1\text{H}$  NMR (400 MHz, Chloroform- $d$ )  $\delta$  [ppm] 7.55-7.50 (m, 2H), 7.47-7.41 (m, 2H), 7.41-7.35 (m, 2H), 7.30-7.24 (m, 1H), 7.20 (d,  $J$  = 7.9 Hz, 2H), 7.16-7.05 (m, 2H), 2.39 (s, 3H);  $^{13}\text{C}$  NMR (125 MHz, Chloroform- $d$ )  $\delta$  [ppm] 137.49, 134.52, 129.37, 128.62, 128.60, 127.67, 127.38, 126.41, 126.37, 21.23.

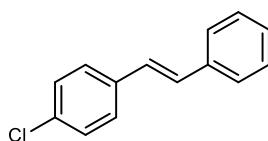

**(E)-1-chloro-4-styrylbenzene (8c).** The compound was prepared in 99% yield.  $^1\text{H}$  NMR (500 MHz, Chloroform-*d*)  $\delta$  [ppm] 7.56-7.50 (m, 2H), 7.45 (d,  $J$  = 8.5 Hz, 2H), 7.39 (dd,  $J$  = 8.4, 6.9 Hz, 2H), 7.36-7.32 (m, 2H), 7.32-7.28 (m, 1H), 7.12-7.04 (m, 2H);  $^{13}\text{C}$  NMR (125 MHz, Chloroform-*d*)  $\delta$  [ppm] 136.92, 135.78, 133.10, 129.25, 128.78, 128.68, 127.81, 127.61, 127.29, 126.50.

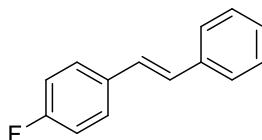

**(E)-1-fluoro-4-styrylbenzene (8d).** The compound was prepared in 85% yield.  $^1\text{H}$  NMR (400 MHz, Chloroform-*d*)  $\delta$  [ppm] 7.55-7.46 (m, 4H), 7.42-7.34 (m, 2H), 7.32-7.26 (m, 1H), 7.13-6.98 (m, 4H);  $^{13}\text{C}$  NMR (125 MHz, Chloroform-*d*)  $\delta$  [ppm] 162.31 (d,  $J$  = 245.7 Hz), 137.14, 133.48 (d,  $J$  = 3.2 Hz), 128.68, 128.46 (d,  $J$  = 2.1 Hz), 127.96 (d,  $J$  = 7.9 Hz), 127.64, 127.44, 126.42, 115.59 (d,  $J$  = 21.5 Hz).  $^{19}\text{F}$  NMR (377 MHz, Chloroform-*d*)  $\delta$  [ppm] -114.20.

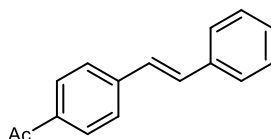

**(E)-1-(4-styrylphenyl) ethan-1-one (8e).** The compound was prepared in 80% yield.  $^1\text{H}$  NMR (400 MHz, Chloroform-*d*)  $\delta$  7.98-7.93 (m, 2H), 7.61-7.50 (m, 4H), 7.42-7.34 (m, 2H), 7.33-7.28 (m, 1H), 7.23 (d,  $J$  = 16.4 Hz, 1H), 7.13 (d,  $J$  = 16.4 Hz, 1H), 2.61 (s, 3H);  $^{13}\text{C}$  NMR (125 MHz, Chloroform-*d*)  $\delta$  [ppm] 197.48, 141.99, 136.67, 135.92, 131.45, 128.86, 128.78, 128.30, 127.42, 126.80, 126.48, 26.57.

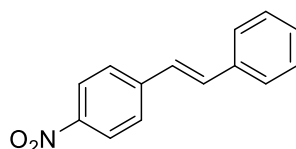

**(E)-1-nitro-4-styrylbenzene (8f).** The compound was prepared in 99% yield.  $^1\text{H}$  NMR (500 MHz, Chloroform-*d*)  $\delta$  [ppm] 8.28-8.12 (m, 2H), 7.68-7.59 (m, 2H), 7.59-7.51 (m, 2H), 7.45-7.37 (m, 2H), 7.37-7.31 (m, 1H), 7.27 (d,  $J$  = 16.4 Hz, 1H), 7.14 (d,  $J$  = 16.3 Hz, 1H);  $^{13}\text{C}$  NMR (125 MHz, Chloroform-*d*)  $\delta$  [ppm] 146.71, 143.80, 136.13, 133.26, 128.86, 128.81, 126.98, 126.81, 126.23, 124.10.

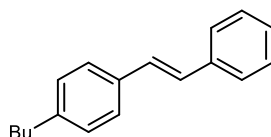

**(E)-1-butyl-4-styrylbenzene (8g).** The compound was prepared in 53% yield.  $^1\text{H}$  NMR (500 MHz, Chloroform-*d*)  $\delta$  [ppm] 7.55-7.47 (m, 2H), 7.43 (d,  $J$  = 8.1 Hz, 2H), 7.39-7.30 (m, 2H), 7.28-7.22 (m, 1H), 7.18 (d,  $J$  = 8.1 Hz, 2H), 7.13-7.04 (m, 2H), 2.67-2.58 (m, 2H), 1.63 (ddd,  $J$  = 15.3, 11.0, 7.5 Hz, 2H), 1.39 (dq,  $J$  = 14.7, 7.4 Hz, 2H), 0.95 (t,  $J$  = 7.4 Hz, 3H);  $^{13}\text{C}$  NMR (125 MHz, Chloroform-*d*)  $\delta$  [ppm] 142.62, 137.66, 134.87, 128.76, 128.64, 127.84, 127.38, 126.45, 126.42, 35.42, 33.53, 22.34, 13.90.

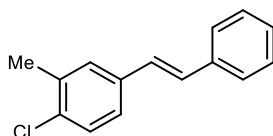

**(E)-1-chloro-2-methyl-4-styrylbenzene (8h).** The compound was prepared in 60% yield.  $^1\text{H}$  NMR (500 MHz, Chloroform-*d*)  $\delta$  [ppm] 7.56-7.47 (m, 3H), 7.37 (t,  $J$  = 7.6 Hz, 2H), 7.32-7.24 (m, 2H), 7.21 (d,  $J$  = 7.8 Hz, 1H), 7.04 (q,  $J$  = 16.3 Hz, 2H), 2.38 (s, 3H);  $^{13}\text{C}$  NMR (125 MHz, Chloroform-*d*)  $\delta$  [ppm] 137.00, 136.71, 135.20, 134.69, 131.08, 129.07, 128.70, 127.79, 127.18, 126.77, 126.52, 124.72, 19.83.

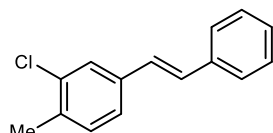

**(E)-2-chloro-1-methyl-4-styrylbenzene (8i).** The compound was prepared in 50% yield.  $^1\text{H}$  NMR (400 MHz, Chloroform-*d*)  $\delta$  [ppm] 7.54-7.48 (m, 3H), 7.42-7.33 (m, 2H), 7.32-7.26 (m, 2H), 7.23-7.19 (m, 1H), 7.11-6.98 (m, 2H), 2.39 (s, 3H);  $^{13}\text{C}$  NMR (125 MHz, Chloroform-*d*)  $\delta$  [ppm] 136.99, 136.70, 135.19, 134.68, 131.07, 129.06, 128.69, 127.78, 127.16, 126.76, 126.51, 124.71, 19.82.

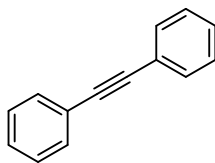

**1,2-diphenylethyne (9a).** The compound was prepared in 98% and 68% yield when X=I and Br, respectively.  $^1\text{H}$  NMR (400 MHz, Chloroform-*d*)  $\delta$  [ppm] 7.60-7.50 (m, 2H), 7.43-7.30 (m, 3H);  $^{13}\text{C}$  NMR (125 MHz, Chloroform-*d*)  $\delta$  [ppm] 131.59, 128.32, 128.23, 123.25, 89.35.

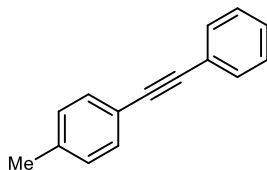

**1-methyl-4-(phenylethynyl) benzene (9b).** The compound was prepared in 97% and 57% yield when X=I and Br, respectively.  $^1\text{H}$  NMR (500 MHz, Chloroform-*d*)  $\delta$  [ppm] 7.55-7.51 (m, 2H), 7.43 (d,  $J$  = 8.1 Hz, 2H), 7.37-7.30 (m, 3H), 7.16 (d,  $J$  = 7.9 Hz, 2H), 2.37 (s, 3H);  $^{13}\text{C}$  NMR (125 MHz, Chloroform-*d*)  $\delta$  [ppm] 138.38, 131.53, 131.48, 129.10, 128.30, 128.06, 123.46, 120.17, 89.53, 88.69, 21.50.

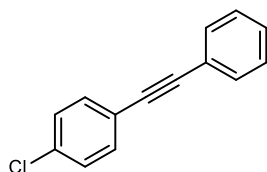

**1-chloro-4-(phenylethynyl) benzene (9c).** The compound was prepared in 99% yield.  $^1\text{H}$  NMR (500 MHz, Chloroform-*d*)  $\delta$  [ppm] 7.59-7.50 (m, 2H), 7.50-7.44 (m, 2H), 7.40-7.29 (m, 5H);  $^{13}\text{C}$  NMR (125



MHz, Chloroform-*d*)  $\delta$  [ppm] 134.23, 132.78, 131.57, 128.66, 128.46, 128.37, 122.90, 121.76, 90.30, 88.22.

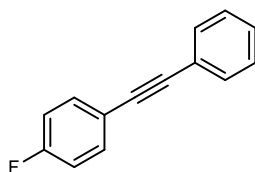

**1-fluoro-4-(phenylethynyl)benzene (9d).** The compound was prepared in 99% yield.  $^1\text{H}$  NMR (500 MHz, Chloroform-*d*)  $\delta$  [ppm] 7.57-7.50 (m, 4H), 7.39-7.32 (m, 3H), 7.09-7.02 (m, 2H);  $^{13}\text{C}$  NMR (125 MHz, Chloroform-*d*)  $\delta$  [ppm] 162.48 (d,  $J$  = 248.1 Hz), 133.46 (d,  $J$  = 8.3 Hz), 131.54, 128.36, 128.32, 123.07, 119.36 (d,  $J$  = 3.3 Hz), 115.63 (d,  $J$  = 22.0 Hz), 89.02, 88.26.  $^{19}\text{F}$  NMR (377 MHz, Chloroform-*d*)  $\delta$  [ppm] -110.94.

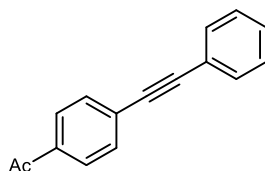

**1-(4-(phenylethynyl)phenyl)ethan-1-one (9e).** The compound was prepared in 99% and 56% yield when  $X=\text{I}$  and  $\text{Br}$ , respectively.  $^1\text{H}$  NMR (500 MHz, Chloroform-*d*)  $\delta$  [ppm] 8.01-7.88 (m, 2H), 7.65-7.58 (m, 2H), 7.58-7.53 (m, 2H), 7.41-7.33 (m, 3H), 2.61 (s, 3H);  $^{13}\text{C}$  NMR (125 MHz, Chloroform-*d*)  $\delta$  [ppm] 197.28, 136.14, 131.70, 131.65, 128.78, 128.41, 128.23, 128.16, 122.61, 92.68, 88.57, 26.59.

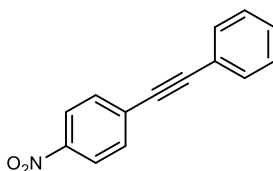

**1-nitro-4-(phenylethynyl)benzene (9f).** The compound was prepared in 99% yield.  $^1\text{H}$  NMR (500 MHz, Chloroform-*d*)  $\delta$  [ppm] 8.27-8.17 (m, 2H), 7.71-7.63 (m, 2H), 7.61-7.51 (m, 2H), 7.44-7.34 (m, 3H);  $^{13}\text{C}$  NMR (125 MHz, Chloroform-*d*)  $\delta$  [ppm] 146.95, 132.24, 131.82, 130.24, 129.26, 128.52, 123.61, 122.07, 94.68, 87.52.

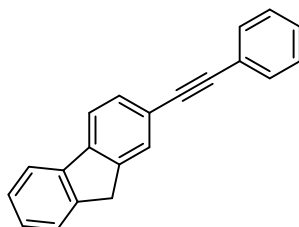

**2-(phenylethynyl)-9H-fluorene (9g).** The compound was prepared in 42% yield.  $^1\text{H}$  NMR (400 MHz, Chloroform-*d*)  $\delta$  [ppm] 7.81-7.74 (m, 2H), 7.74-7.70 (m, 1H), 7.62-7.51 (m, 4H), 7.43-7.30 (m, 5H), 3.92 (s, 2H);  $^{13}\text{C}$  NMR (125 MHz, Chloroform-*d*)  $\delta$  [ppm] 143.56, 143.19, 141.88, 141.09, 131.56, 130.50, 128.35, 128.16, 128.13, 127.15, 126.91, 125.09, 123.45, 121.27, 120.18, 119.78, 90.15, 89.37,

1022 36.74.

1023

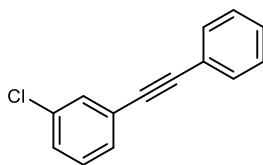

1024

1025 **1-chloro-3-(phenylethynyl) benzene (9h).** The compound was prepared in 56% yield. <sup>1</sup>H NMR (500  
1026 MHz, Chloroform-*d*)  $\delta$  [ppm] 7.55-7.50 (m, 3H), 7.41 (dt, *J* = 7.3, 1.4 Hz, 1H), 7.39-7.33 (m, 3H), 7.33-  
1027 7.27 (m, 2H); <sup>13</sup>C NMR (125 MHz, Chloroform-*d*)  $\delta$  [ppm] 134.22, 131.69, 131.47, 129.71, 129.54,  
1028 128.60, 128.49, 128.40, 125.08, 122.82, 90.57, 87.93.

1029

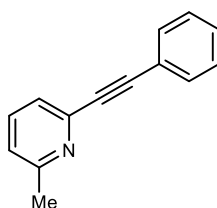

1030

1031 **2-methyl-6-(phenylethynyl) pyridine (9i).** The compound was prepared in 59% yield. <sup>1</sup>H NMR (500  
1032 MHz, Chloroform-*d*)  $\delta$  [ppm] 8.01-7.88 (m, 2H), 7.65-7.58 (m, 2H), 7.58-7.53 (m, 2H), 7.41-7.33 (m,  
1033 3H), 2.61 (s, 3H); <sup>13</sup>C NMR (125 MHz, Chloroform-*d*)  $\delta$  [ppm] 158.85, 142.50, 136.61, 132.09, 128.90,  
1034 128.32, 124.45, 122.69, 122.33, 89.32, 88.51, 24.42.

1035

1036 <sup>1</sup>H and <sup>13</sup>C-NMR spectra of product 4a.

1037

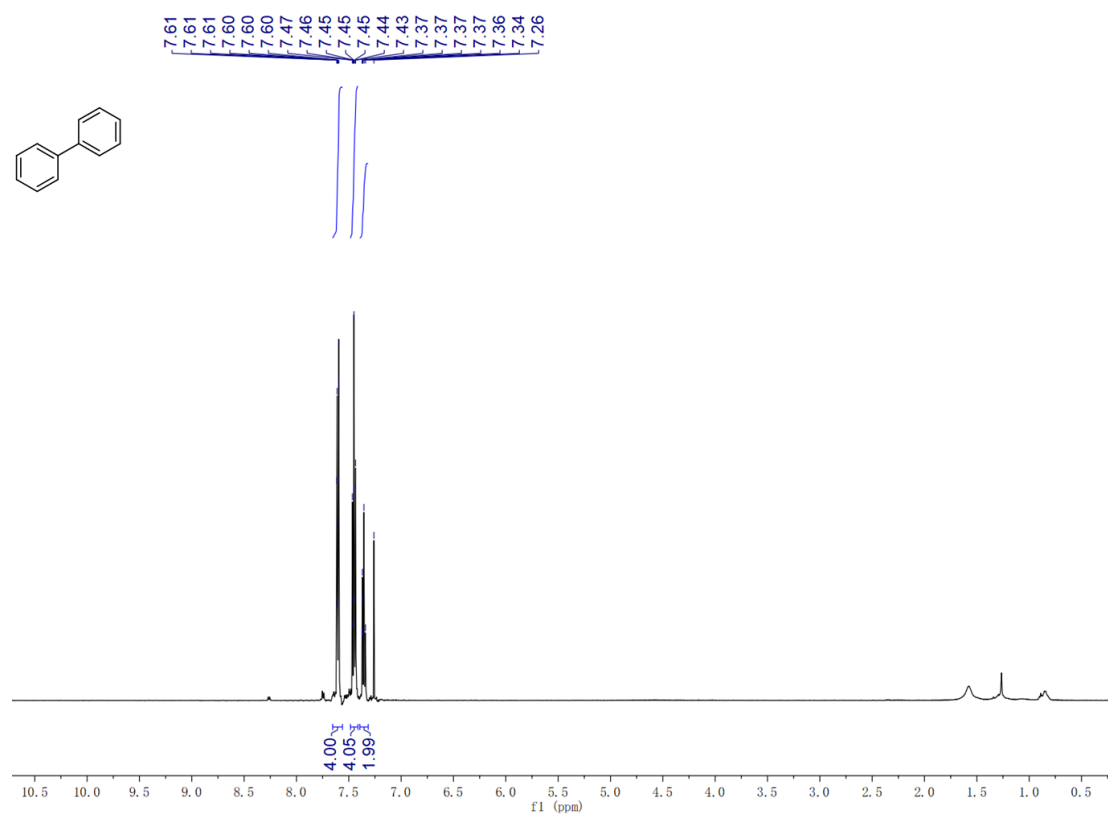

1038

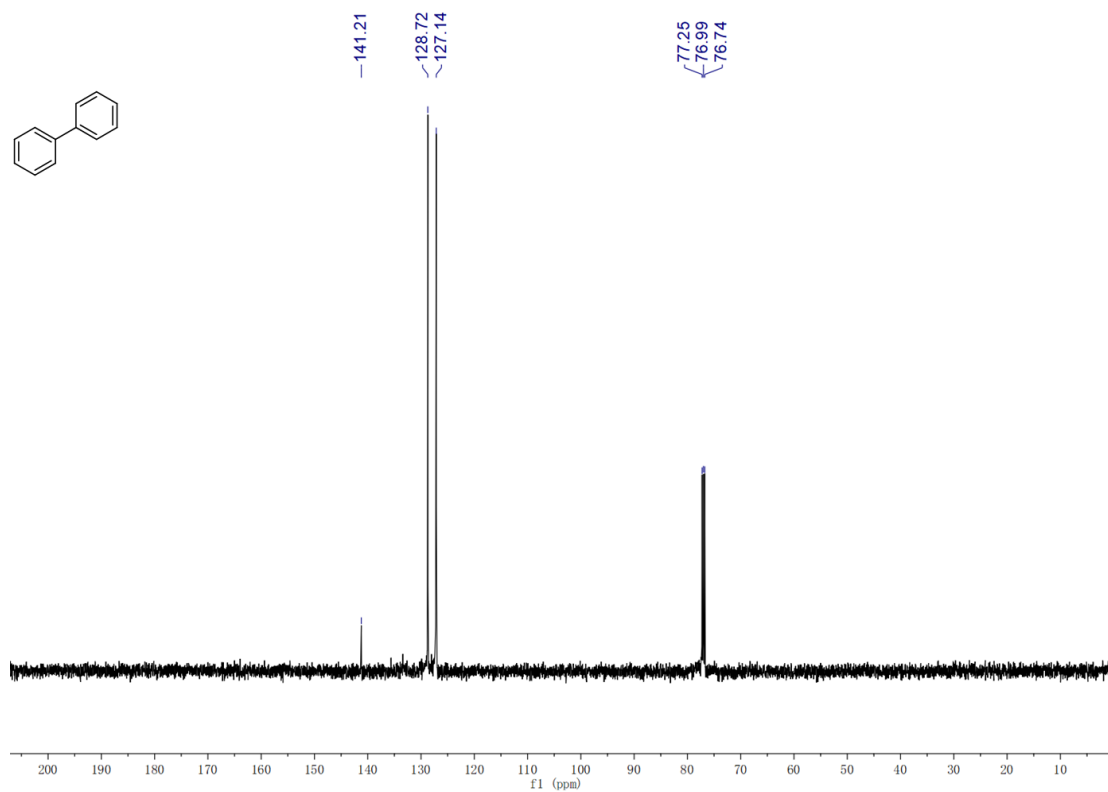

1039

1040

1041

1042 <sup>1</sup>H and <sup>13</sup>C, <sup>19</sup>F-NMR spectra of product 4b.

1043

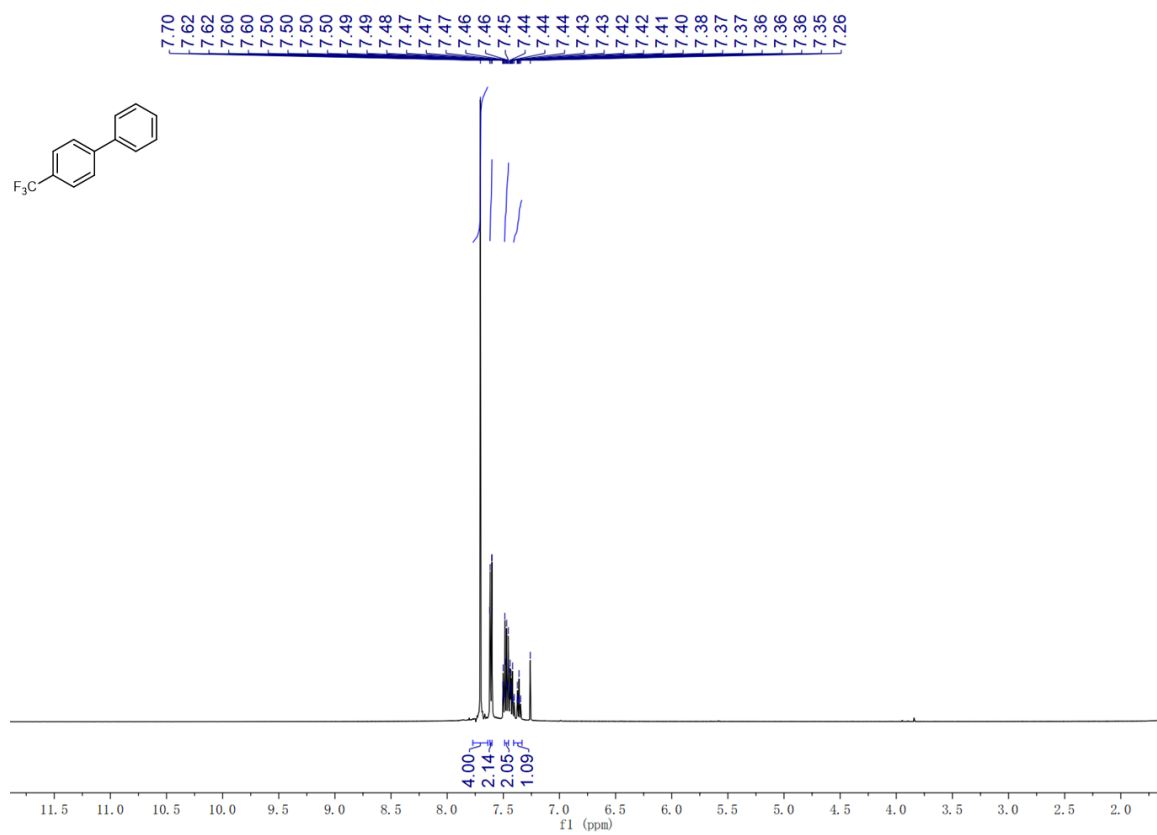

1044

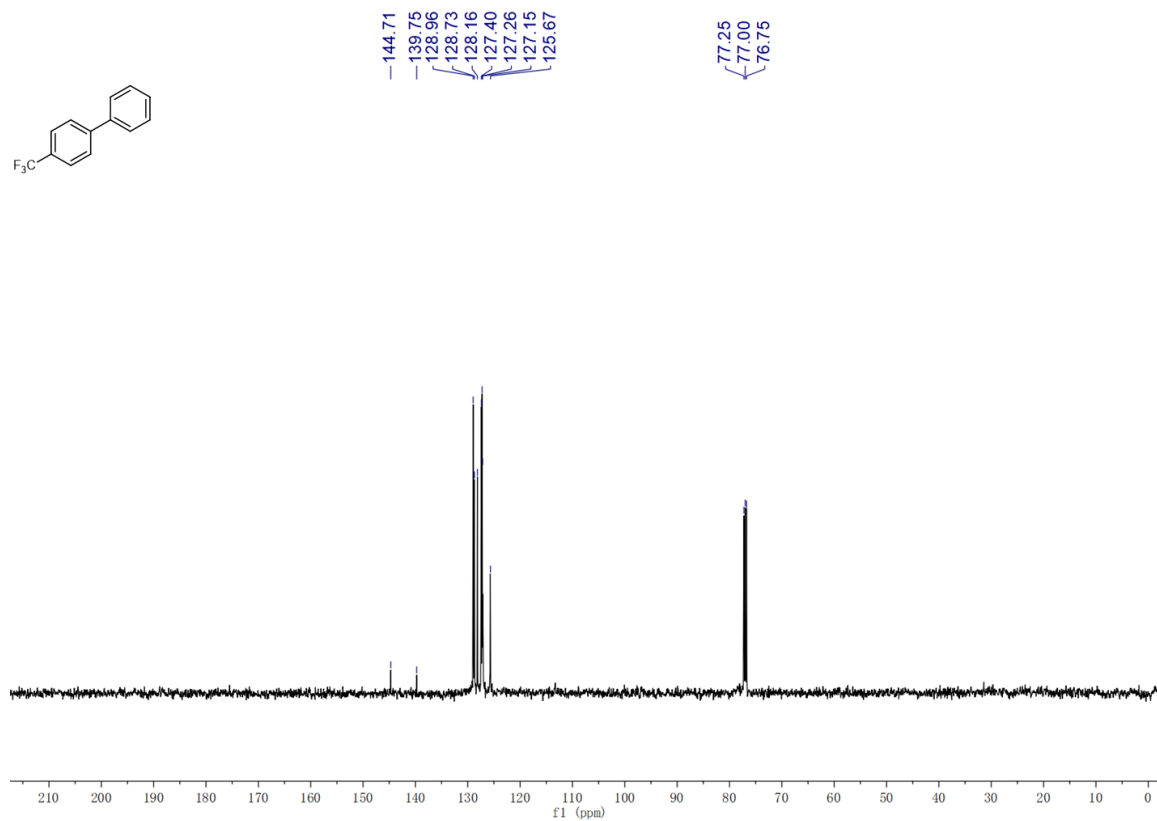

1045

1046

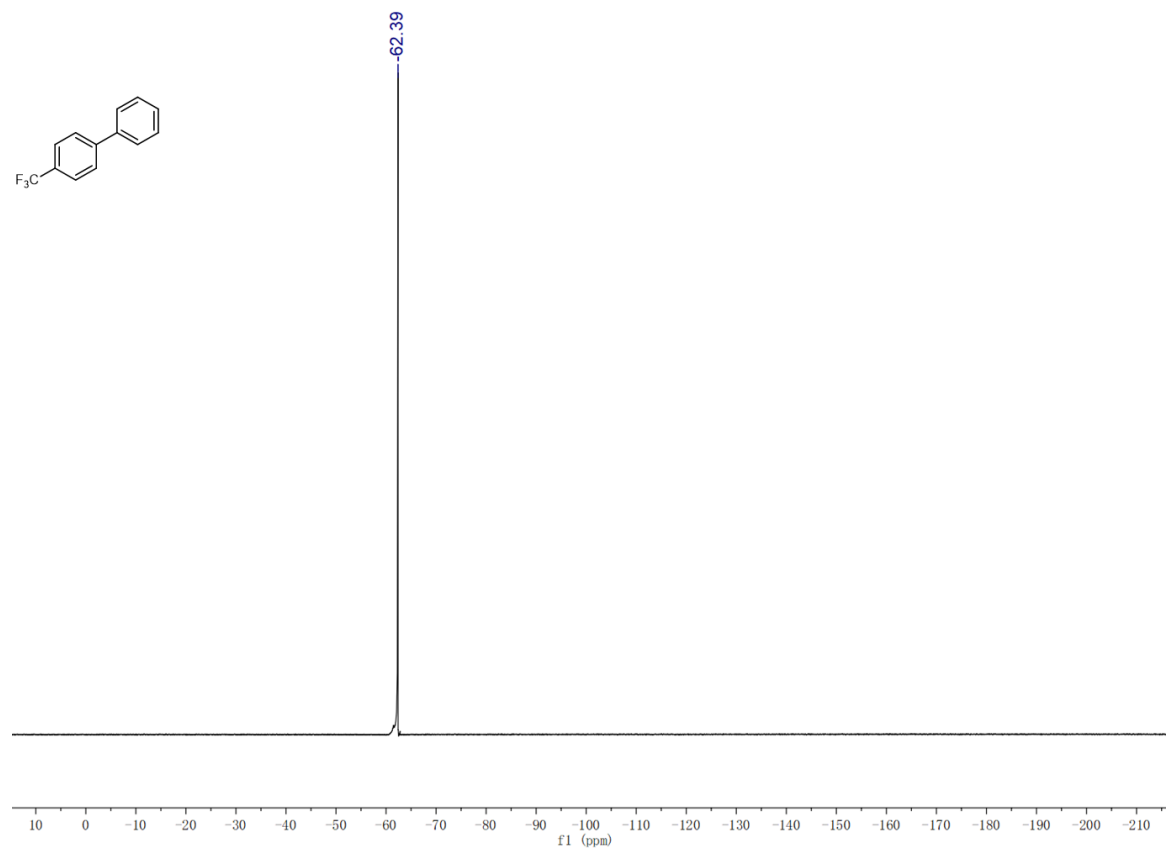

1047

1048

1049 <sup>1</sup>H and <sup>13</sup>C-NMR spectra of product 4c.

1050

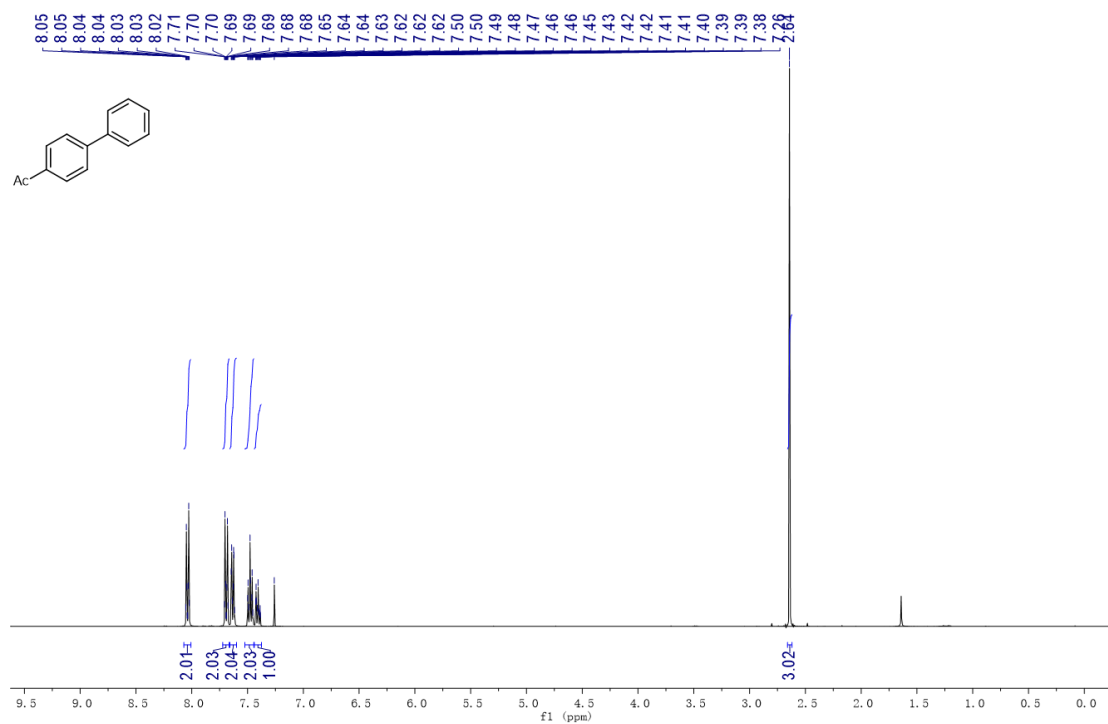

1051

1052

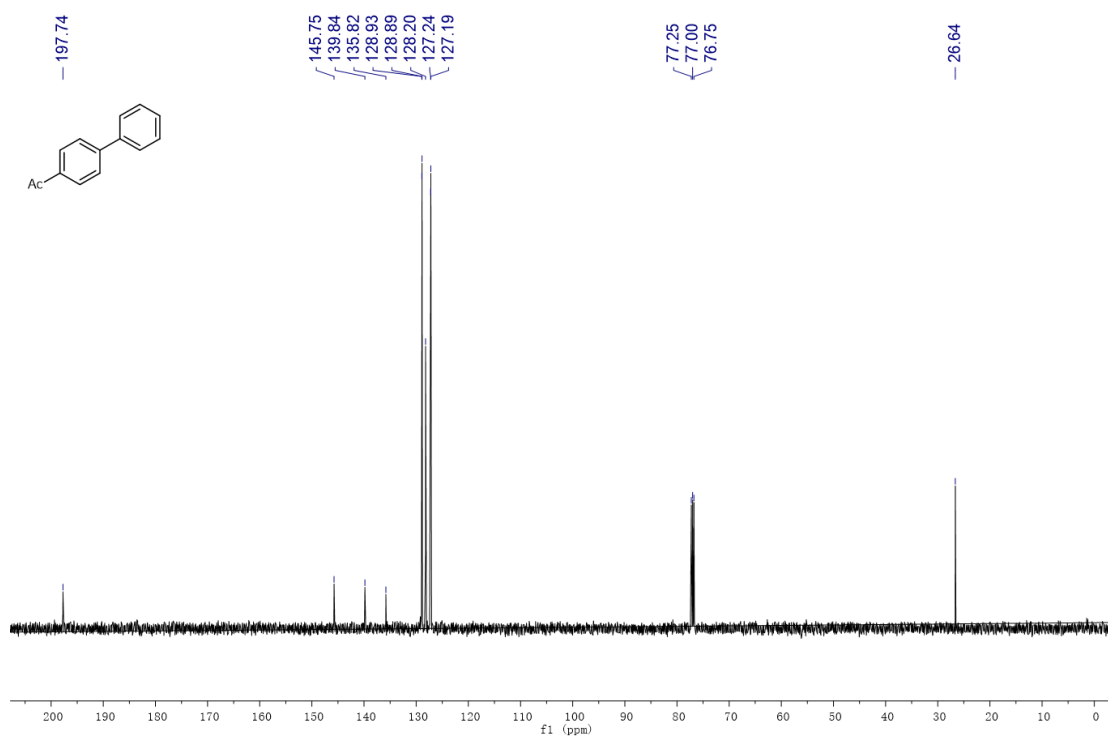

1053

1054

1055 <sup>1</sup>H and <sup>13</sup>C-NMR spectra of product 4d.

1056

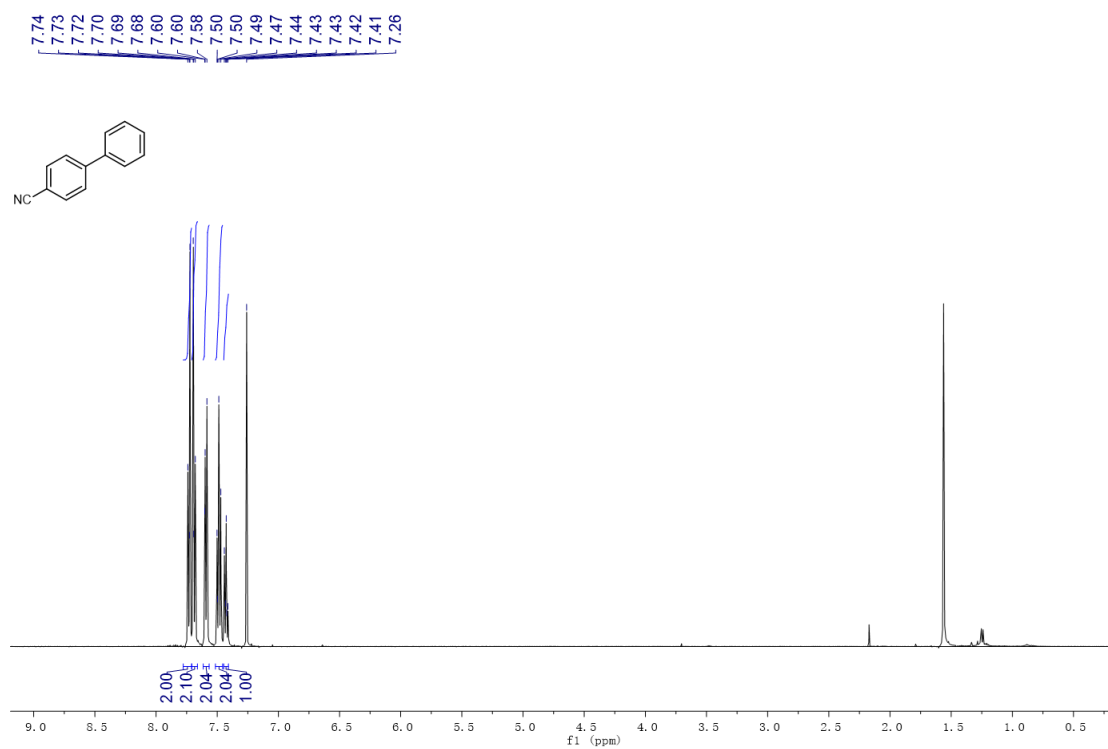

1057

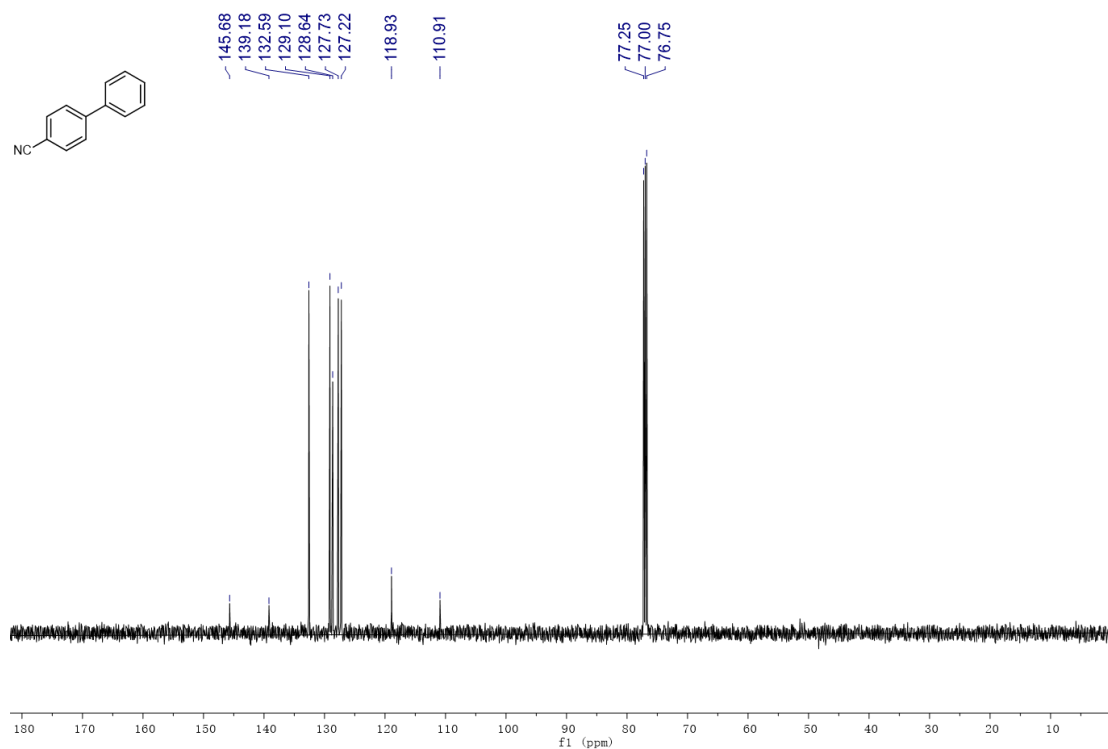

1058

1059

1060

1061 <sup>1</sup>H and <sup>13</sup>C-NMR spectra of product 4e.

1062

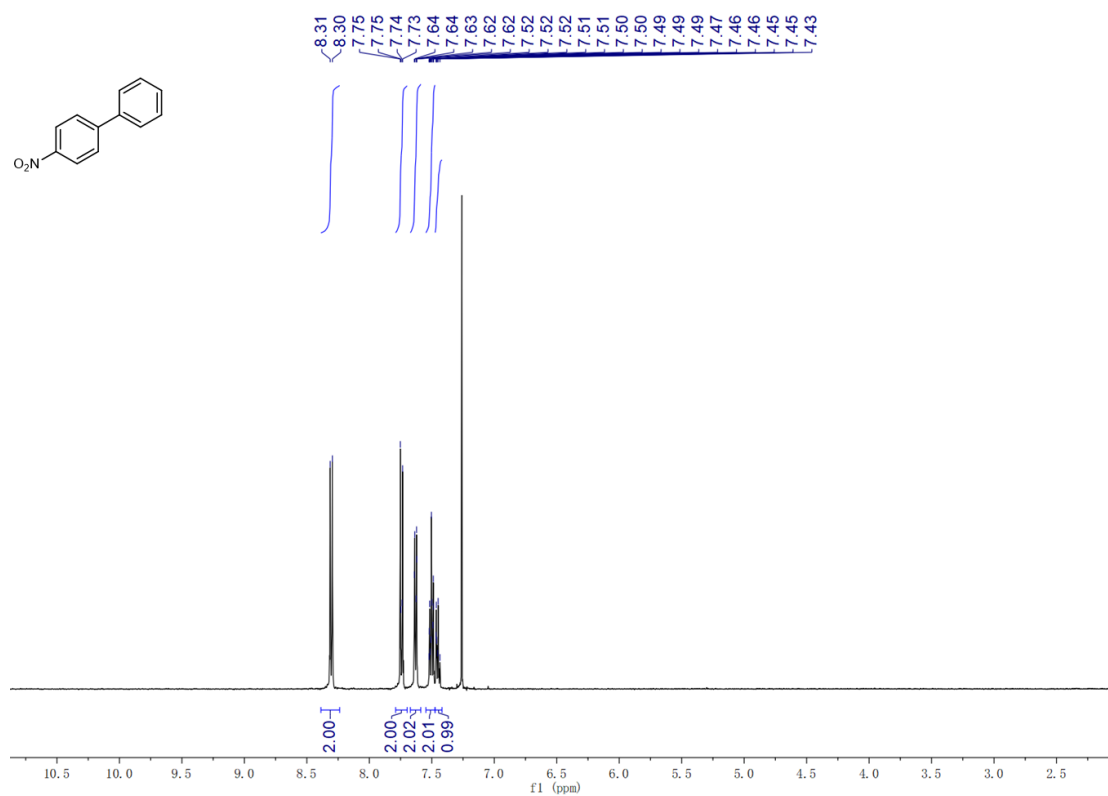

1063

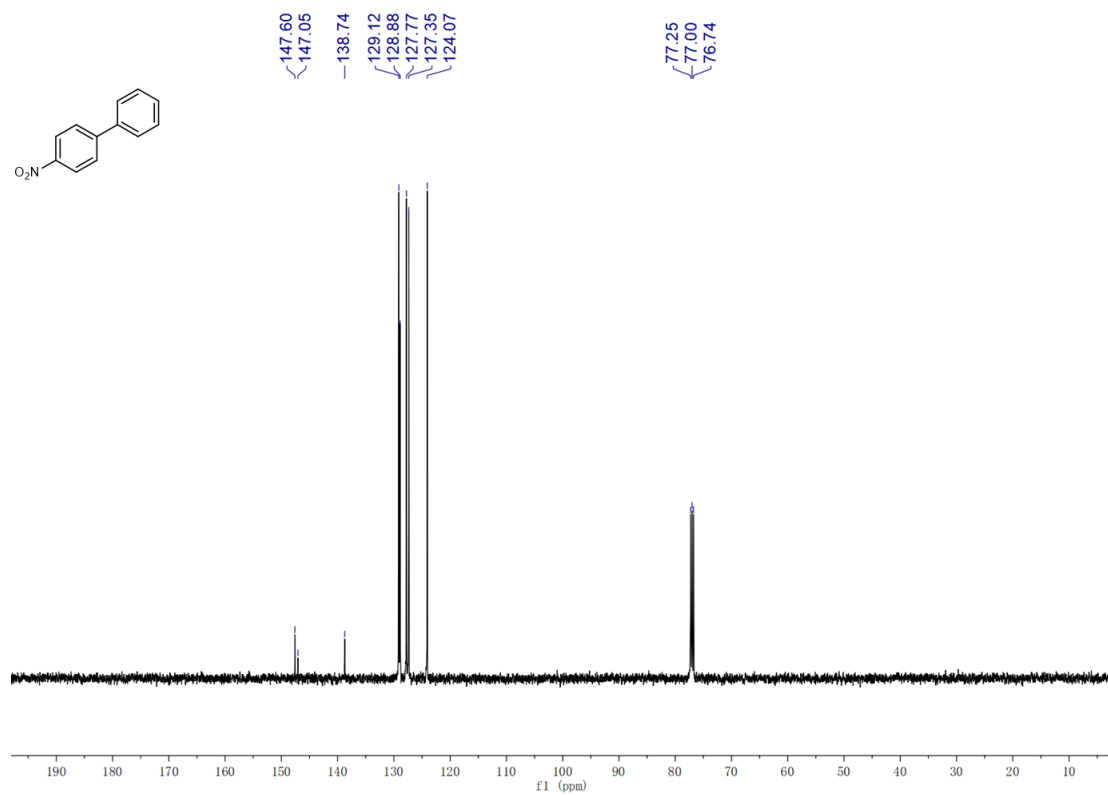

1064

1065



1066 <sup>1</sup>H and <sup>13</sup>C-NMR spectra of product 4f.

1067

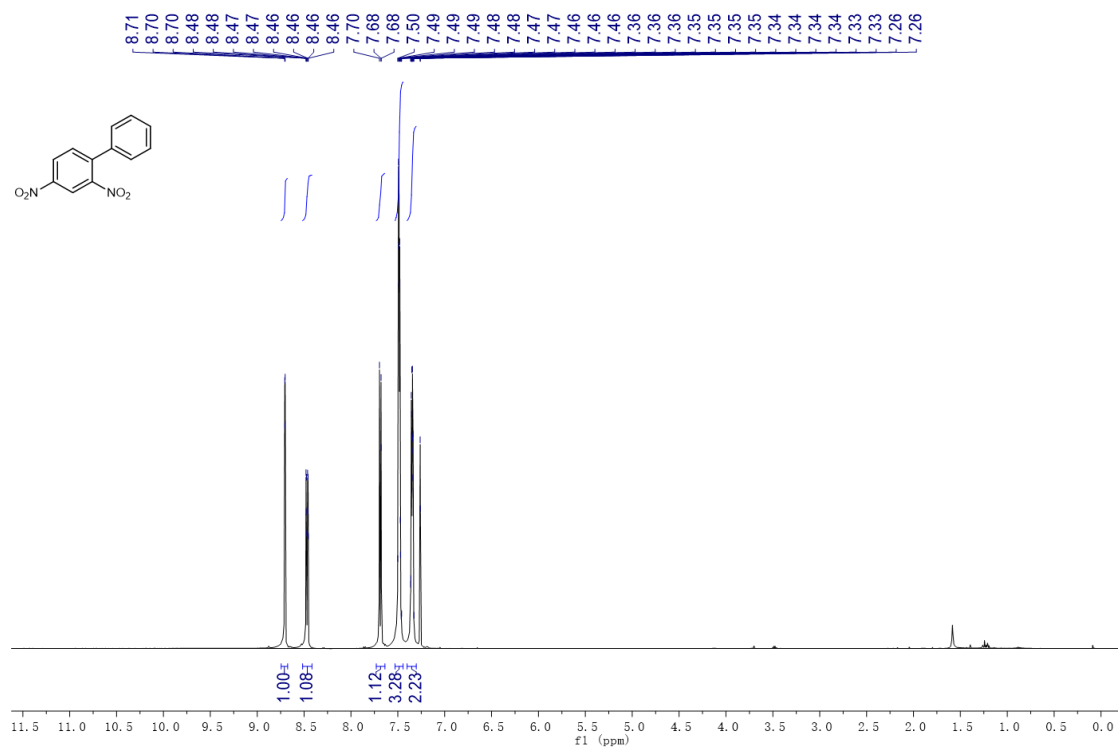

1068

1069

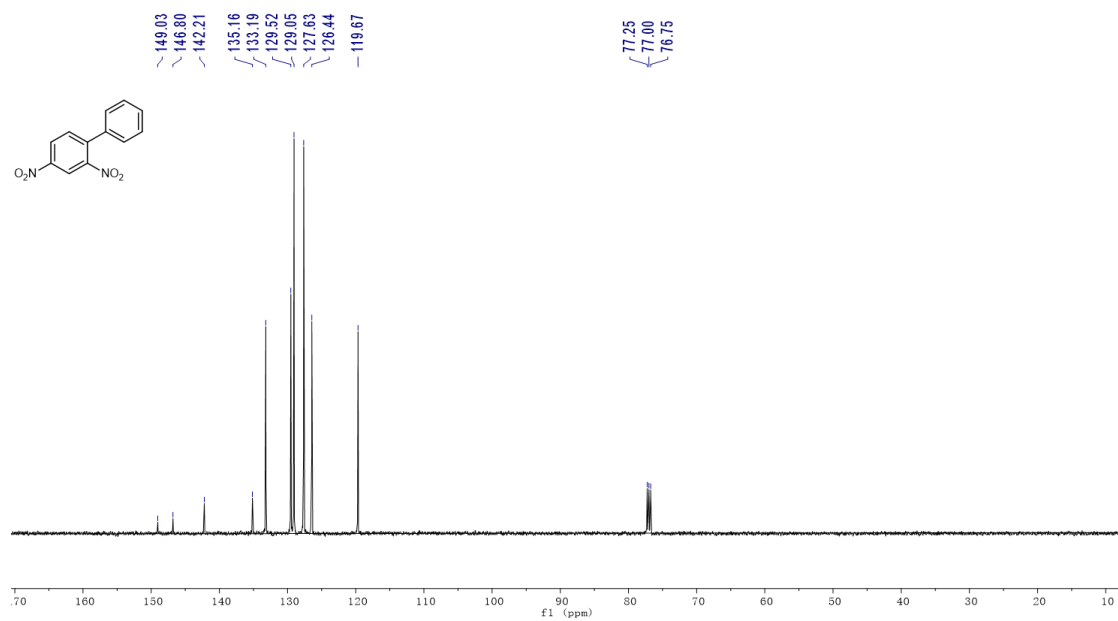

1070

1071

1072 <sup>1</sup>H and <sup>13</sup>C-NMR spectra of product 4g.

1073

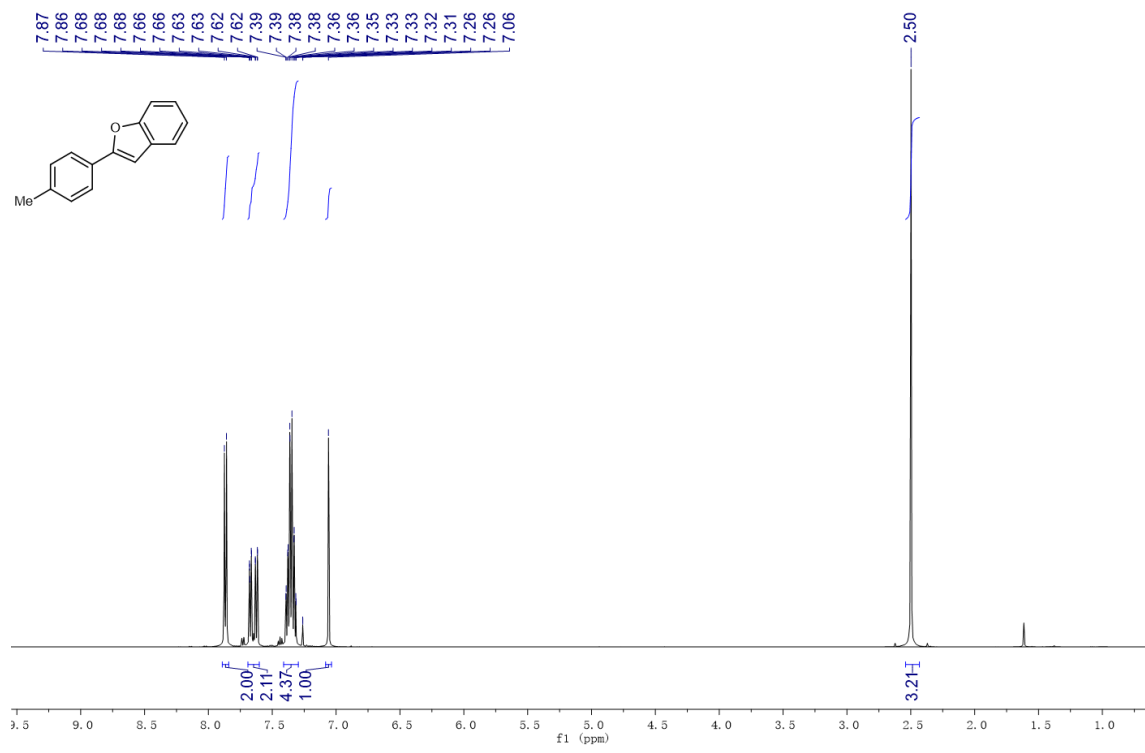

1074

1075

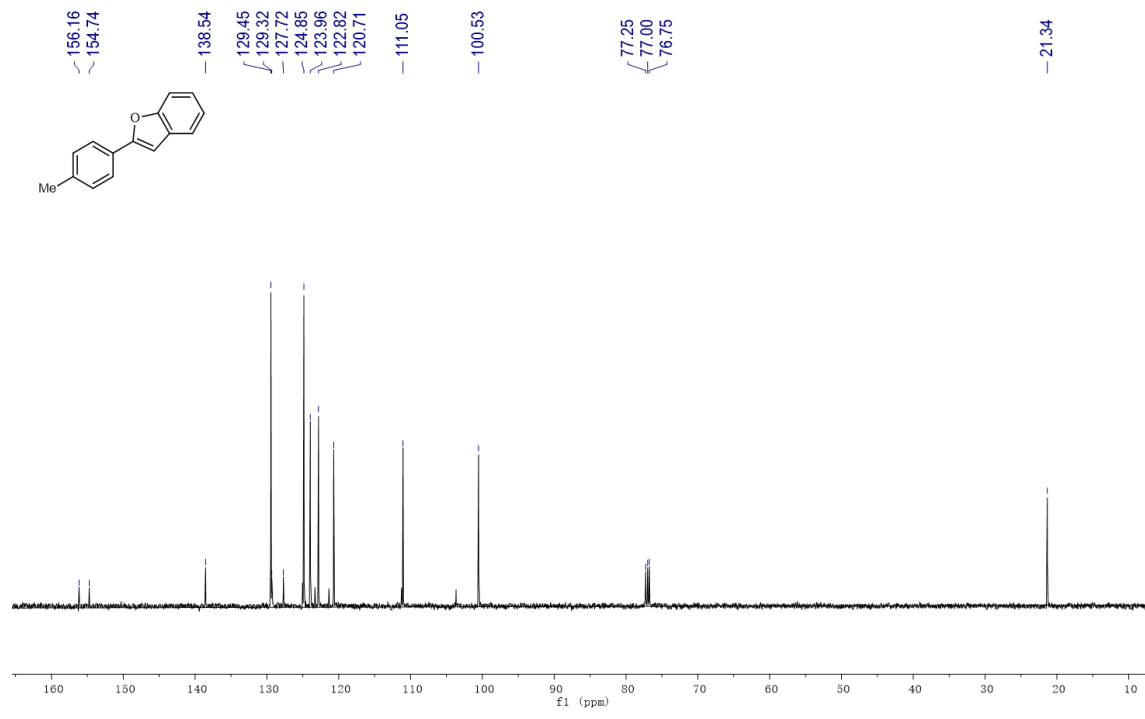

1076

1077

1078

1079 <sup>1</sup>H and <sup>13</sup>C-spectra of product 4h.

1080

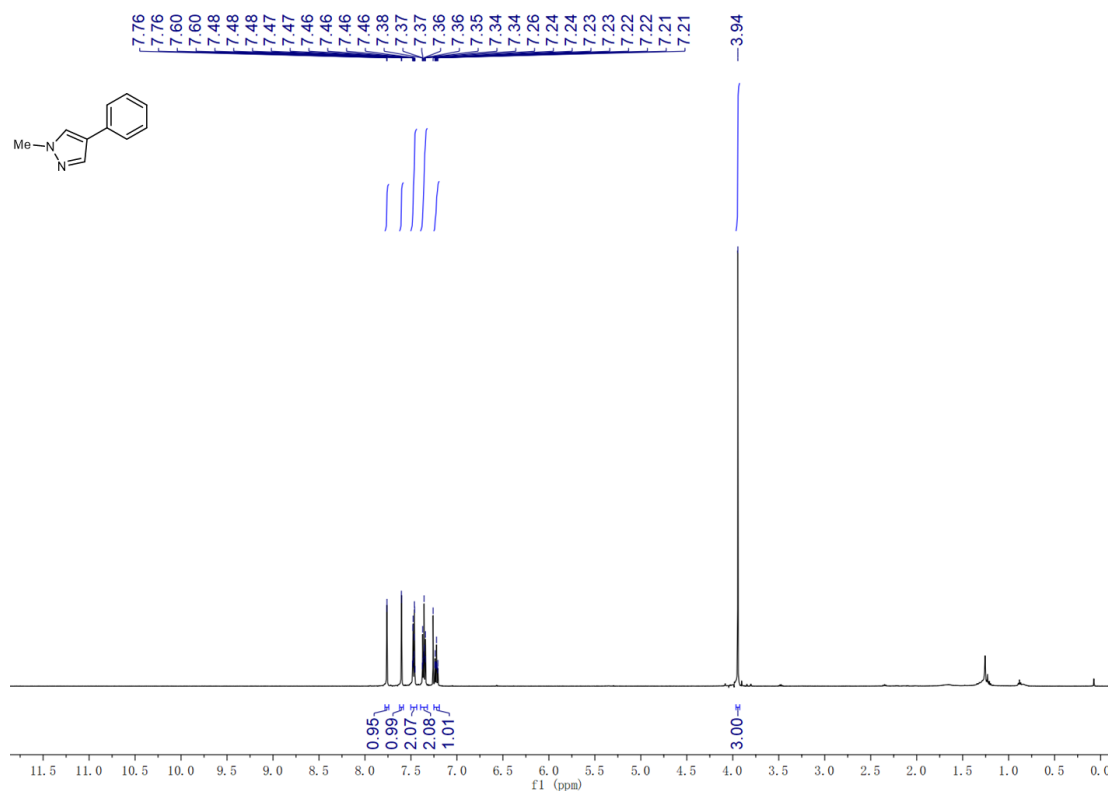

1081

1082

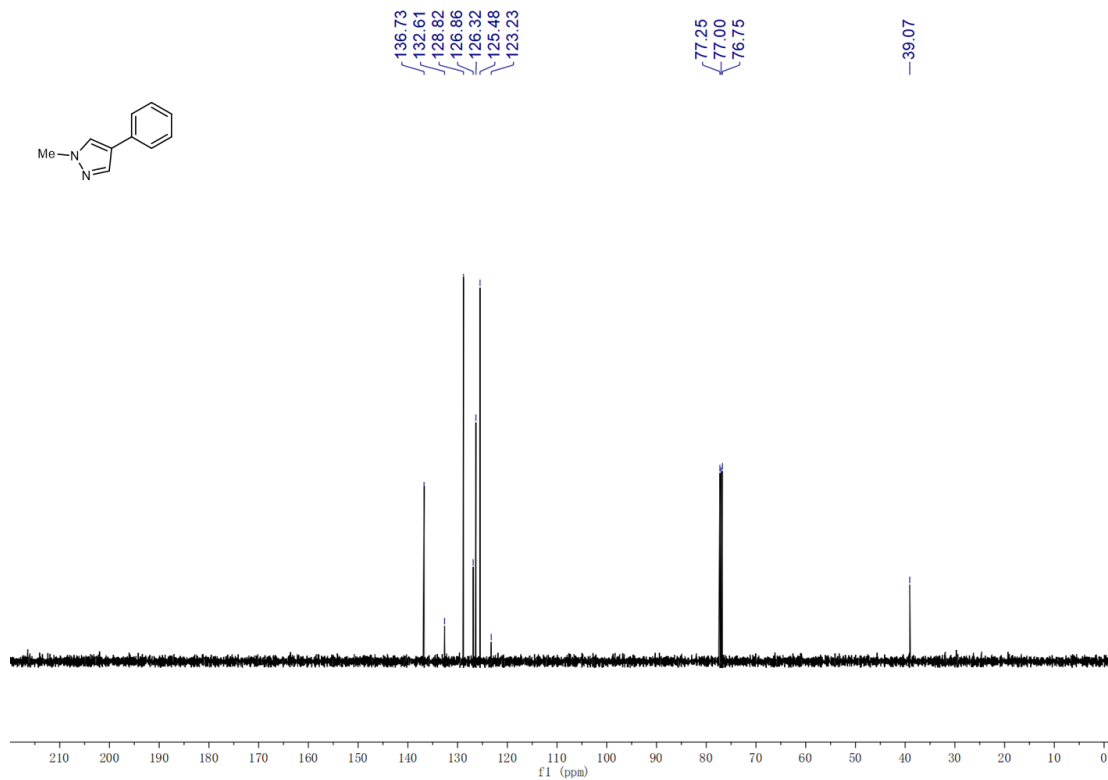

1083

1084 <sup>1</sup>H, <sup>13</sup>C-NMR spectra of product 4i.

1085

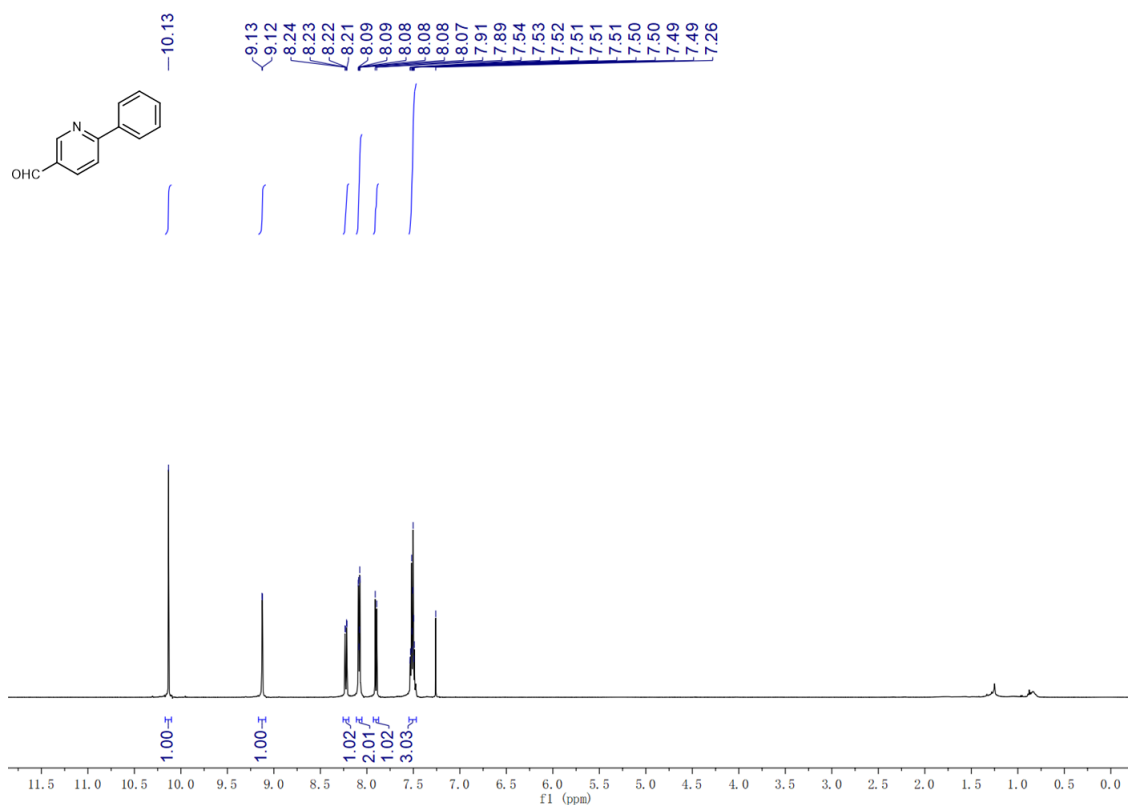

1086

1087

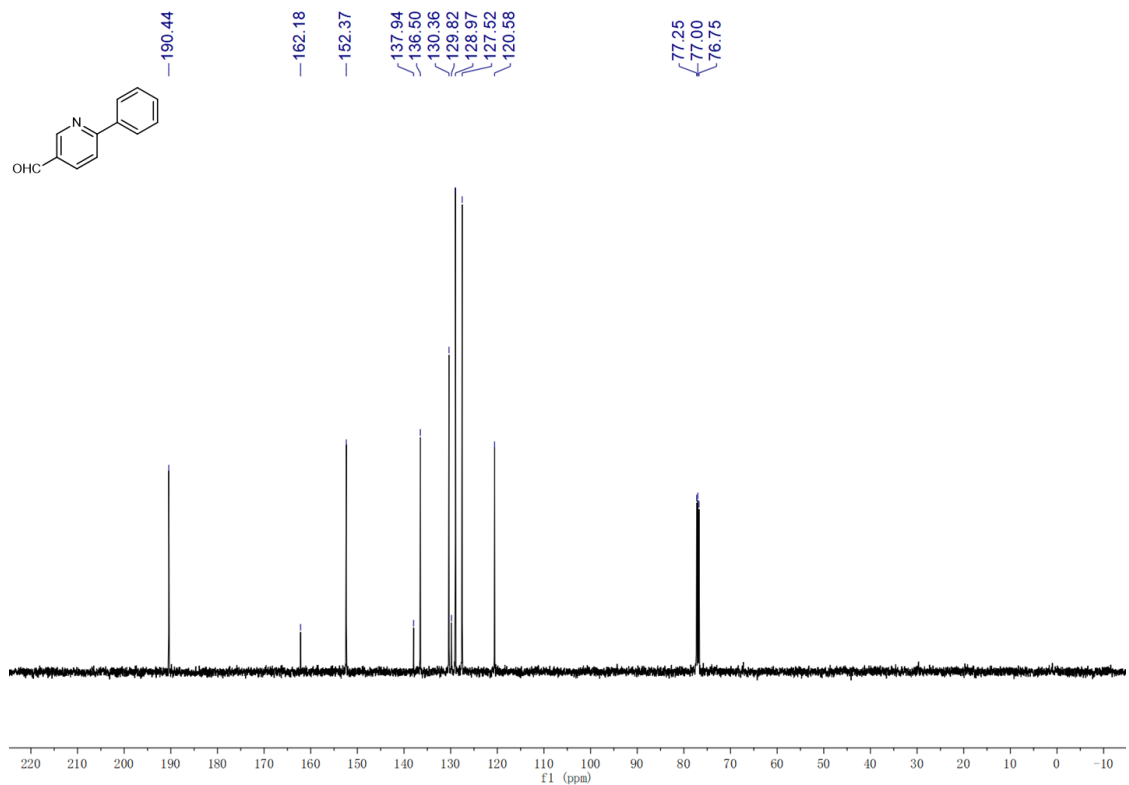

1088

1089

1090 <sup>1</sup>H and <sup>13</sup>C, <sup>19</sup>F-NMR spectra of product 4j.

1091

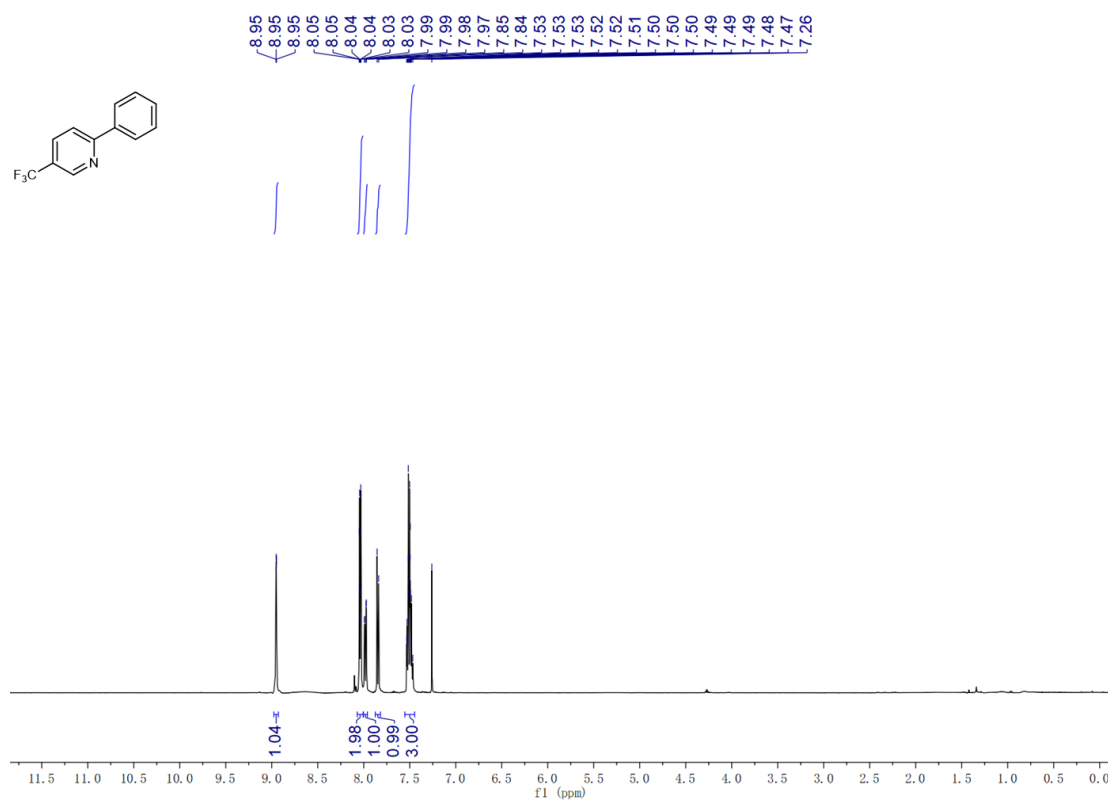

1092

1093

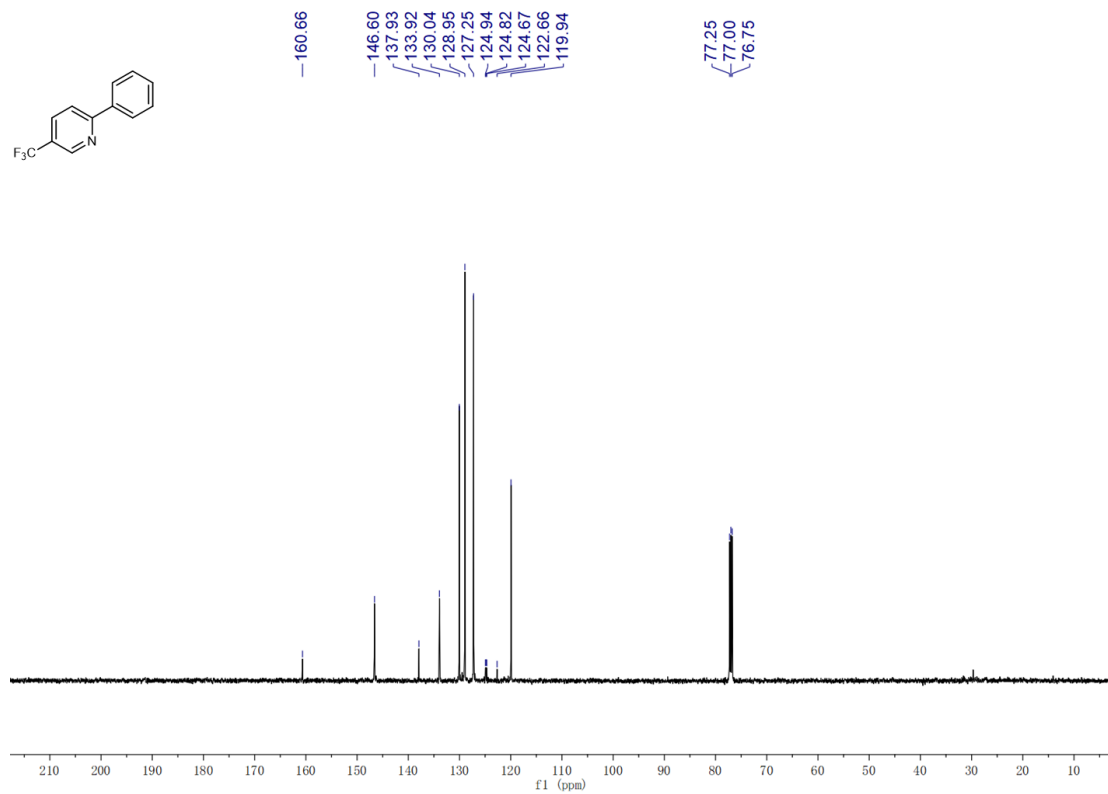

1094

1095

1096

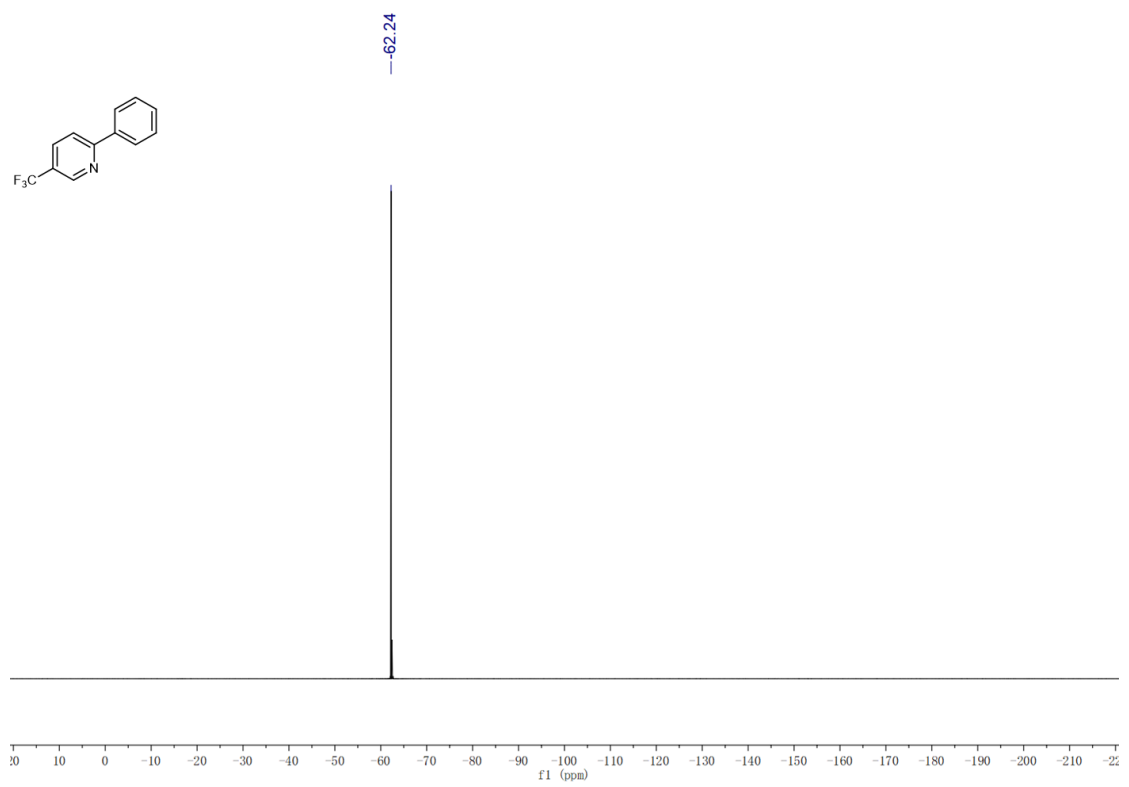

1097

1098 <sup>1</sup>H and <sup>13</sup>C, <sup>19</sup>F-NMR spectra of product 4k.

1099

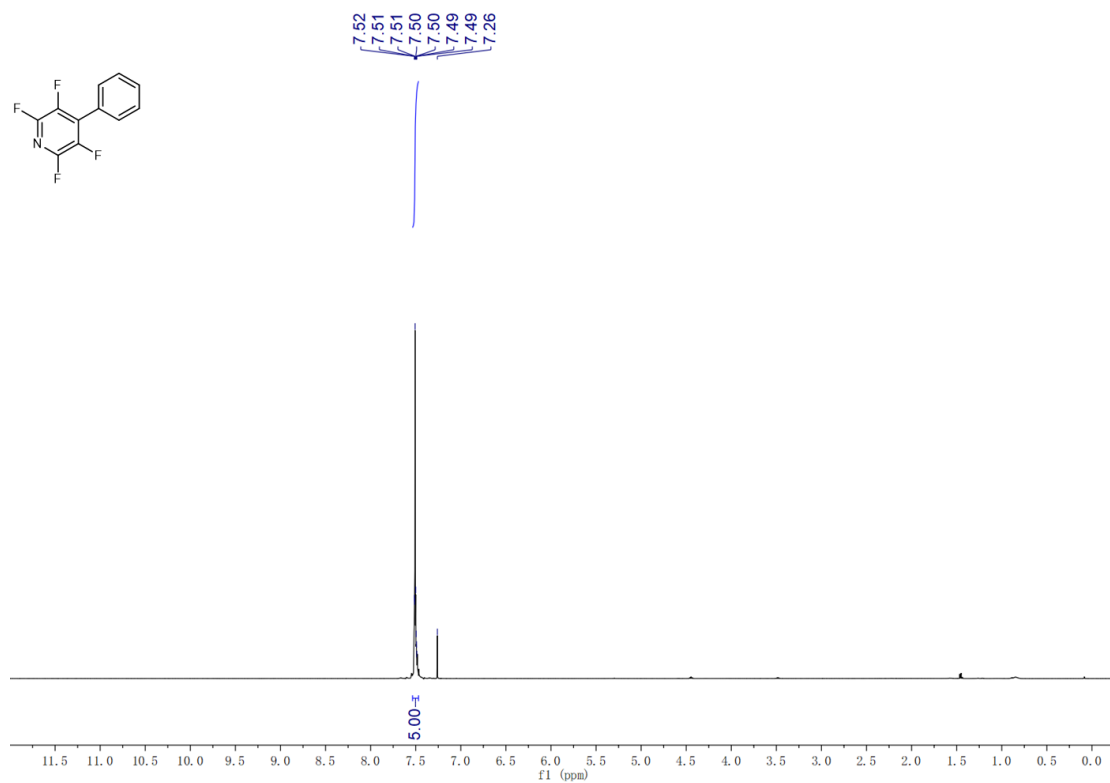

1100

1101

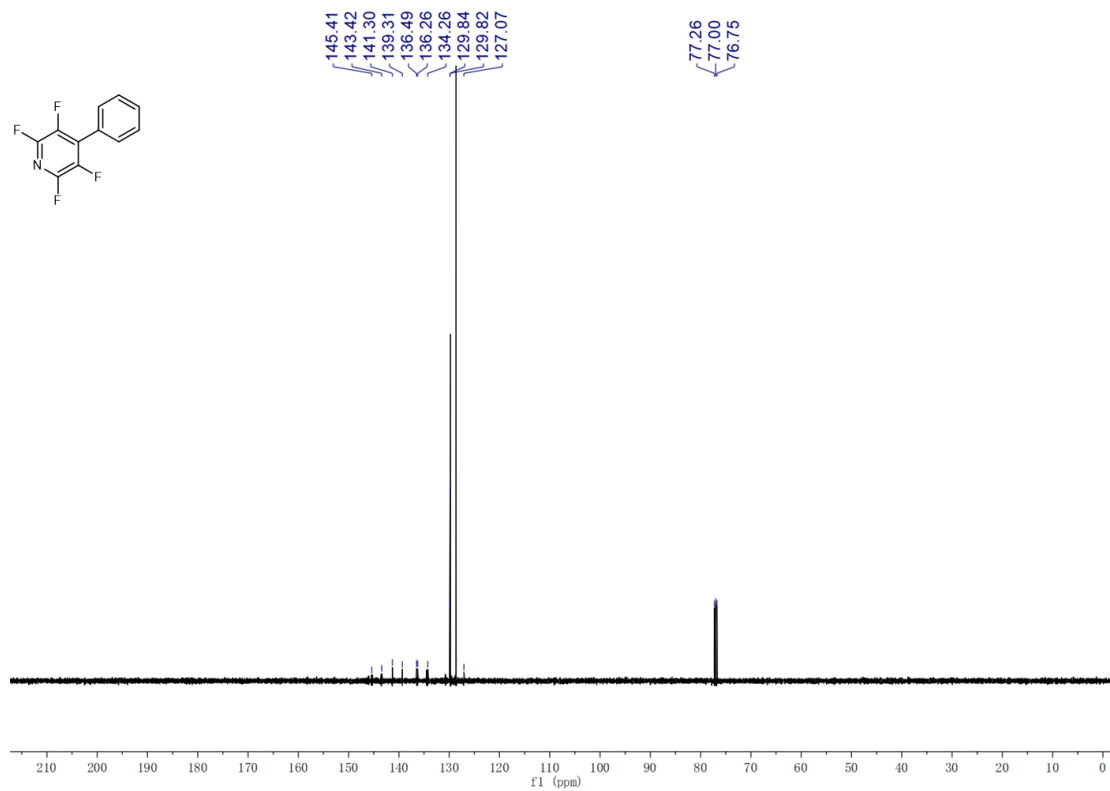

1102

1103

1104

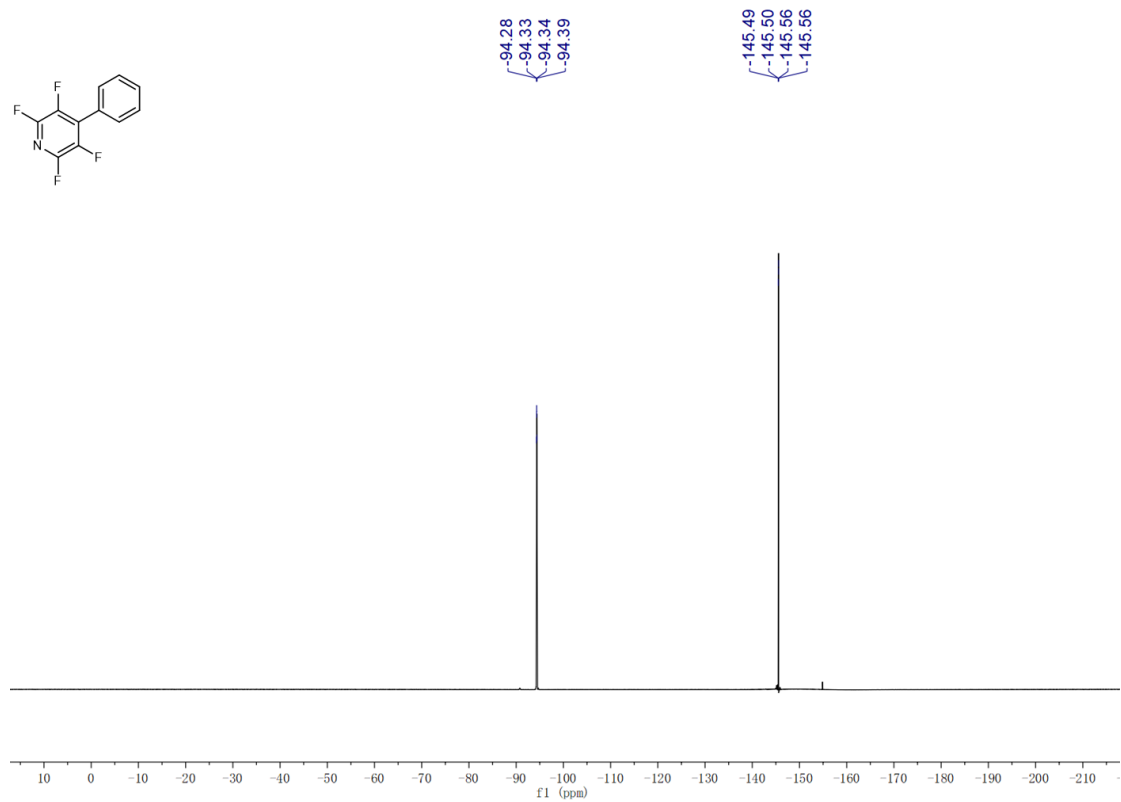

1105

1106



1107 <sup>1</sup>H and <sup>13</sup>C spectra of product 4l.

1108

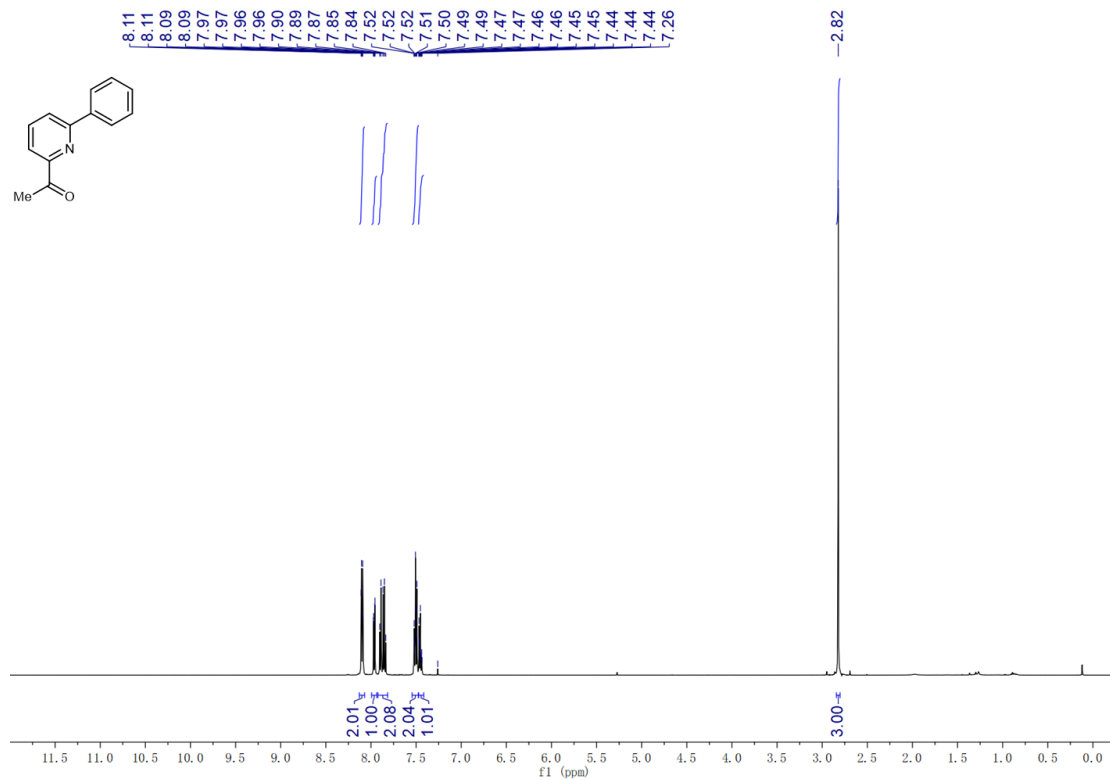

1109

1110

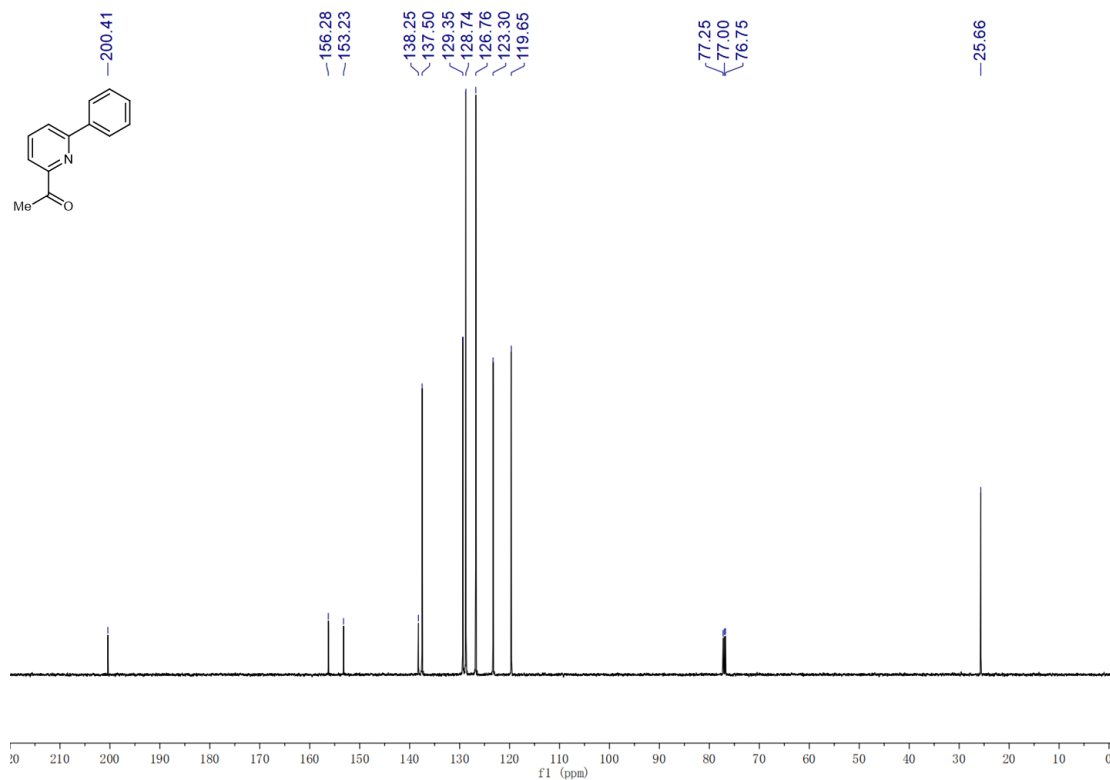

1111

1112

1113

1114 <sup>1</sup>H and <sup>13</sup>C-spectra of product 4m.

1115

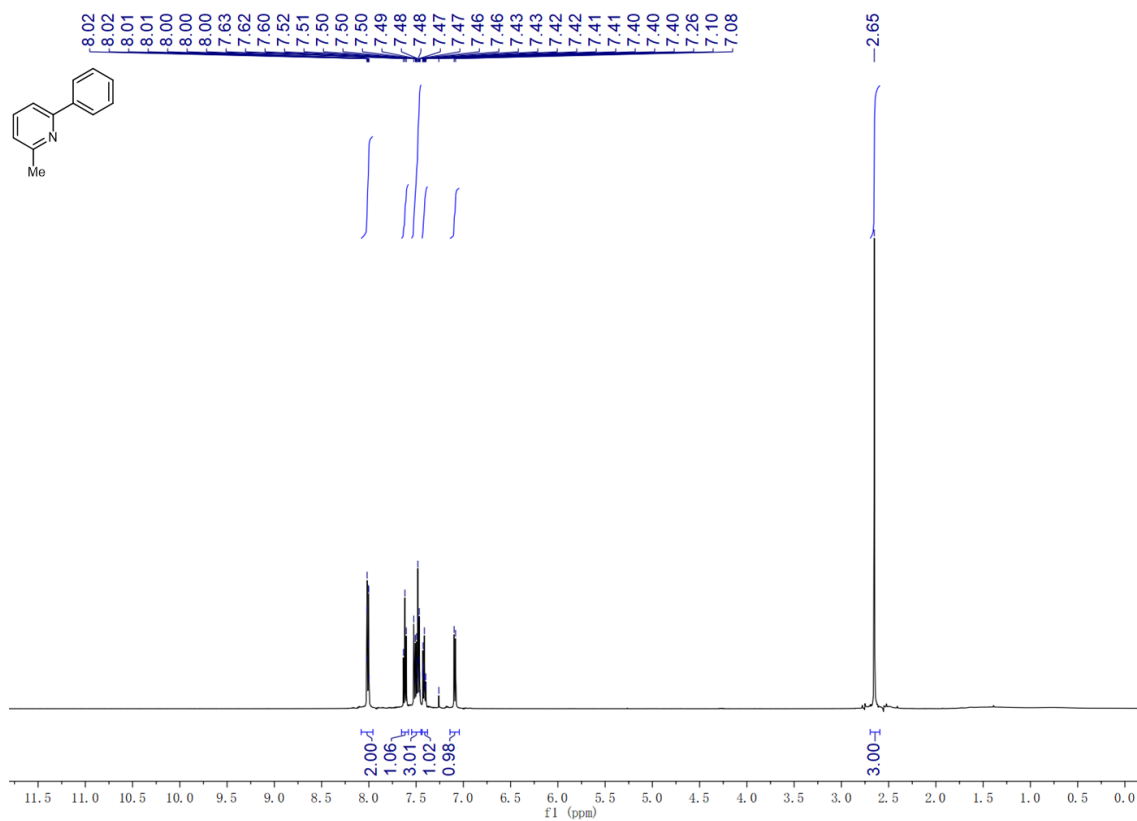

1116

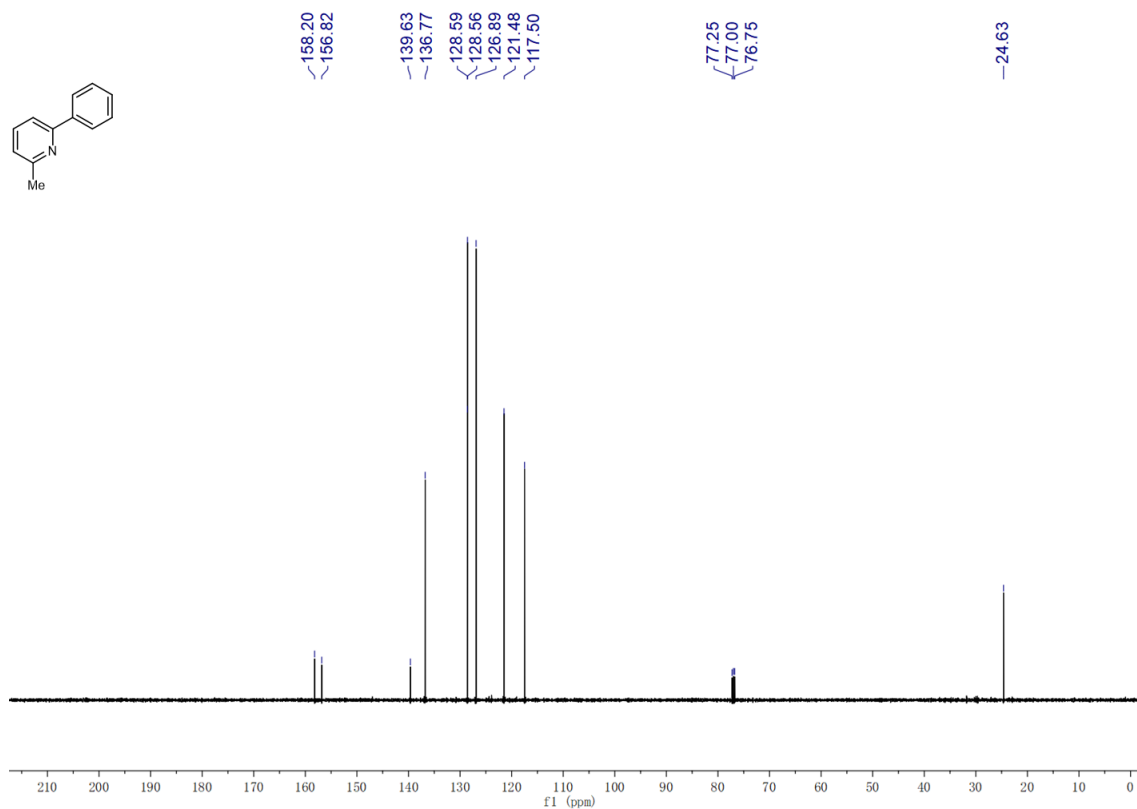

1117

1118

1119 <sup>1</sup>H and <sup>13</sup>C-NMR spectra of product 4n.

1120

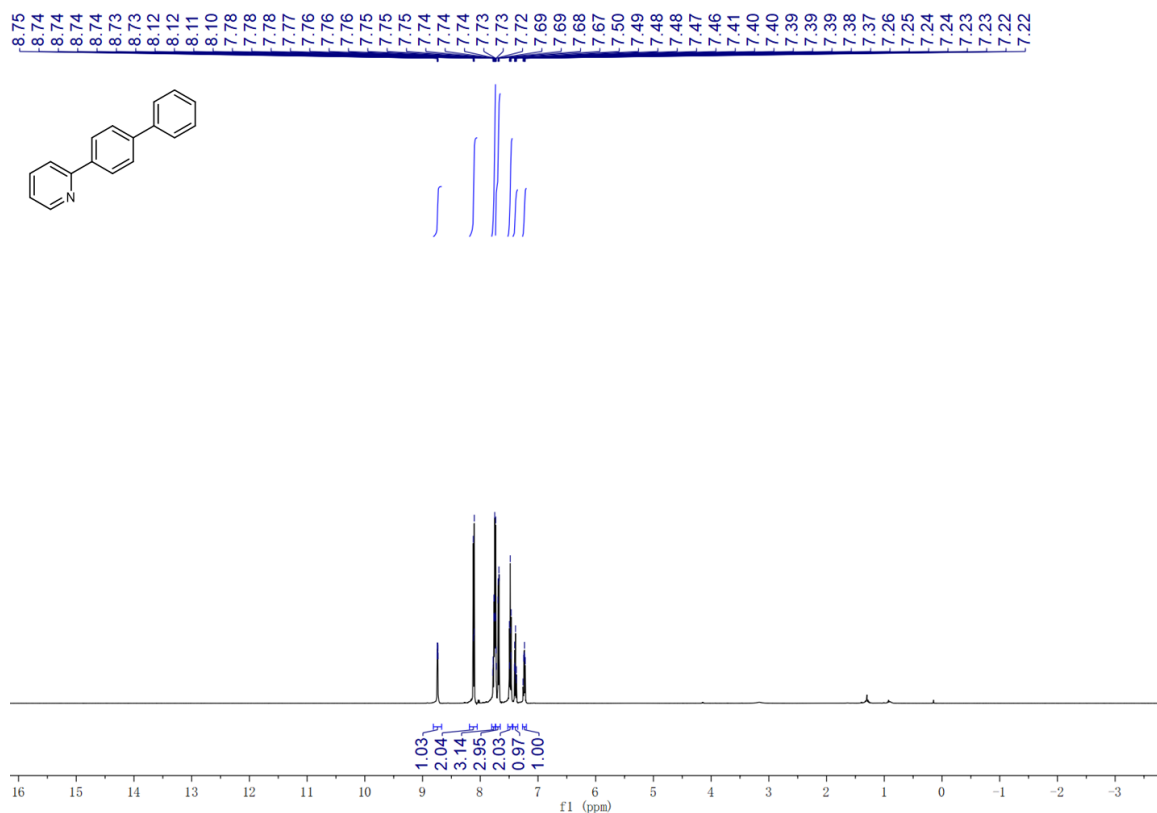

1121

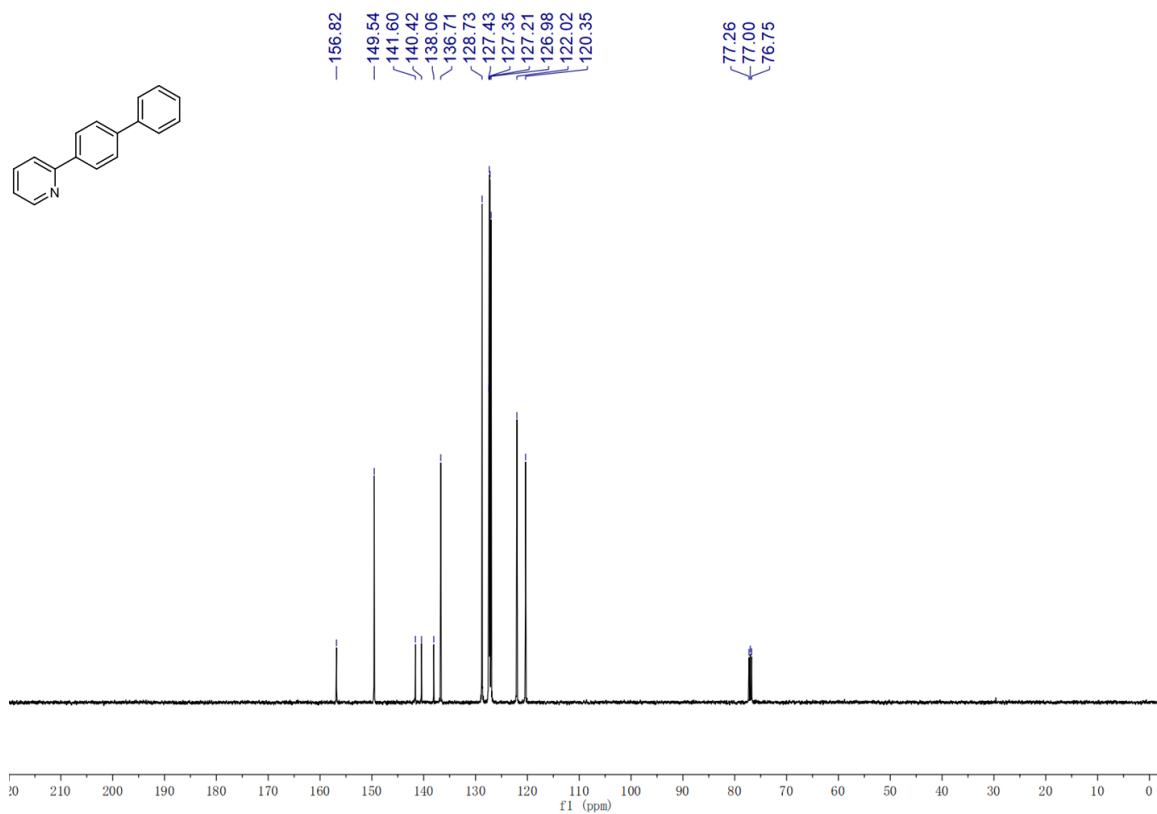

1122

1123

1124 <sup>1</sup>H and <sup>13</sup>C spectra of product 4o.

1125

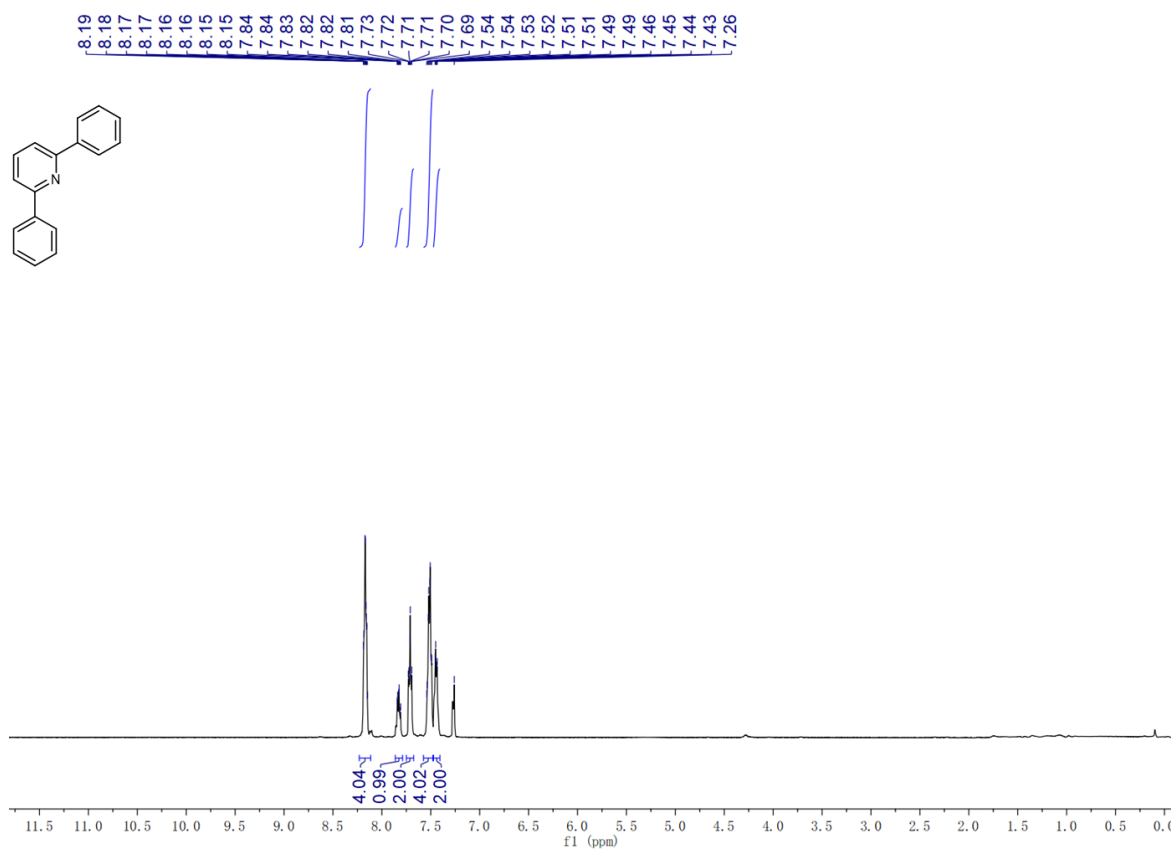

1126

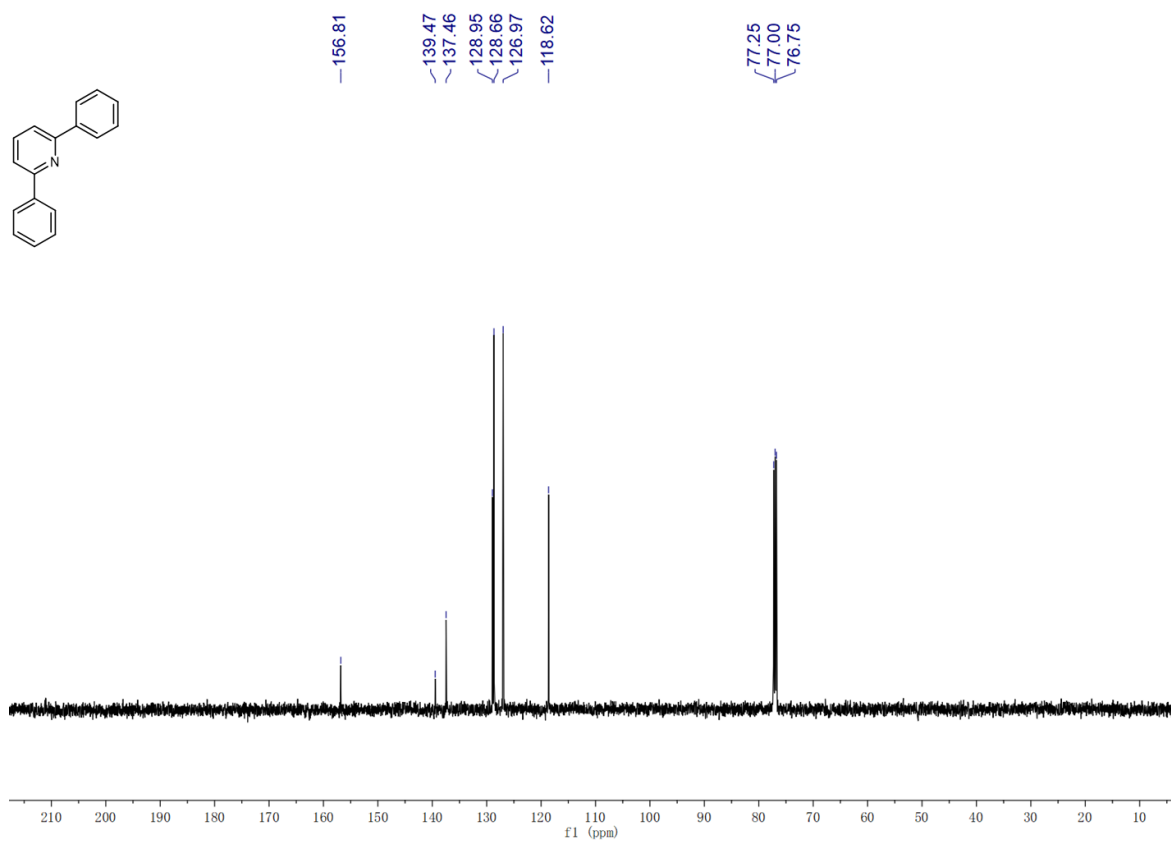

1127

1128 <sup>1</sup>H and <sup>13</sup>C- NMR spectra of product 4p.

1129

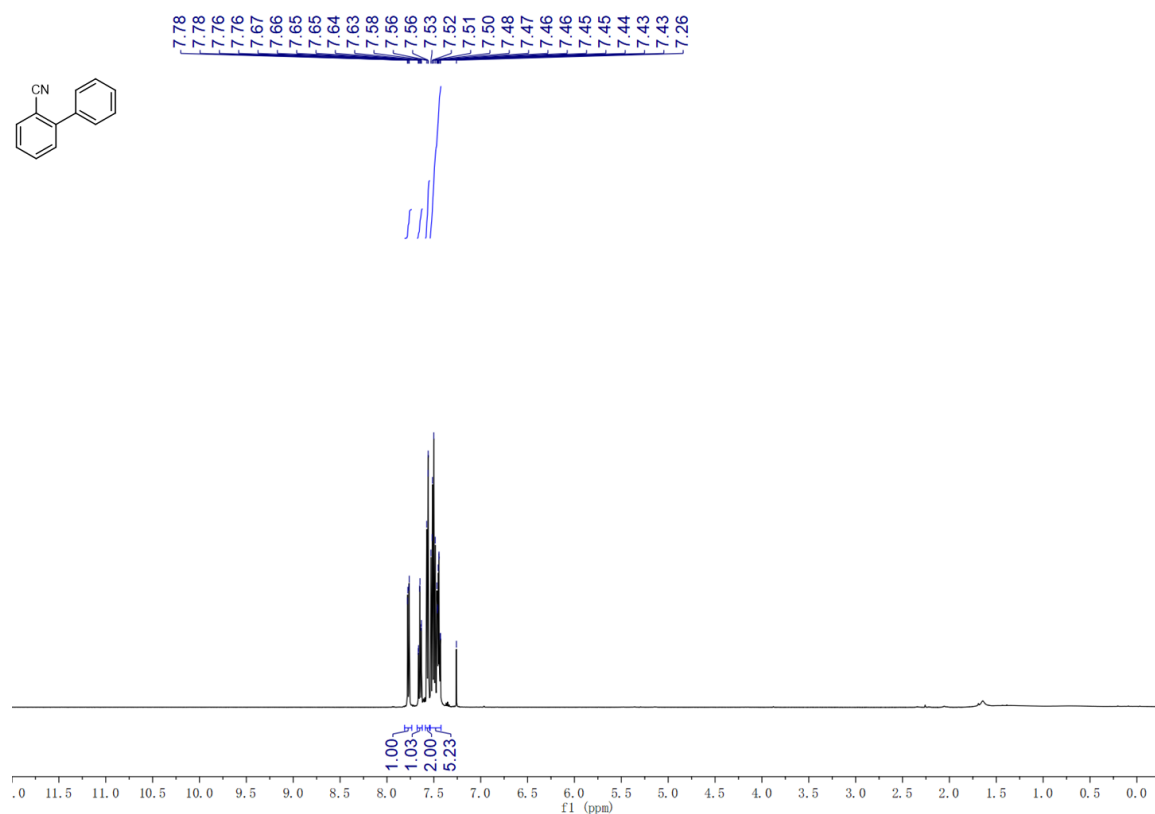

1130

1131

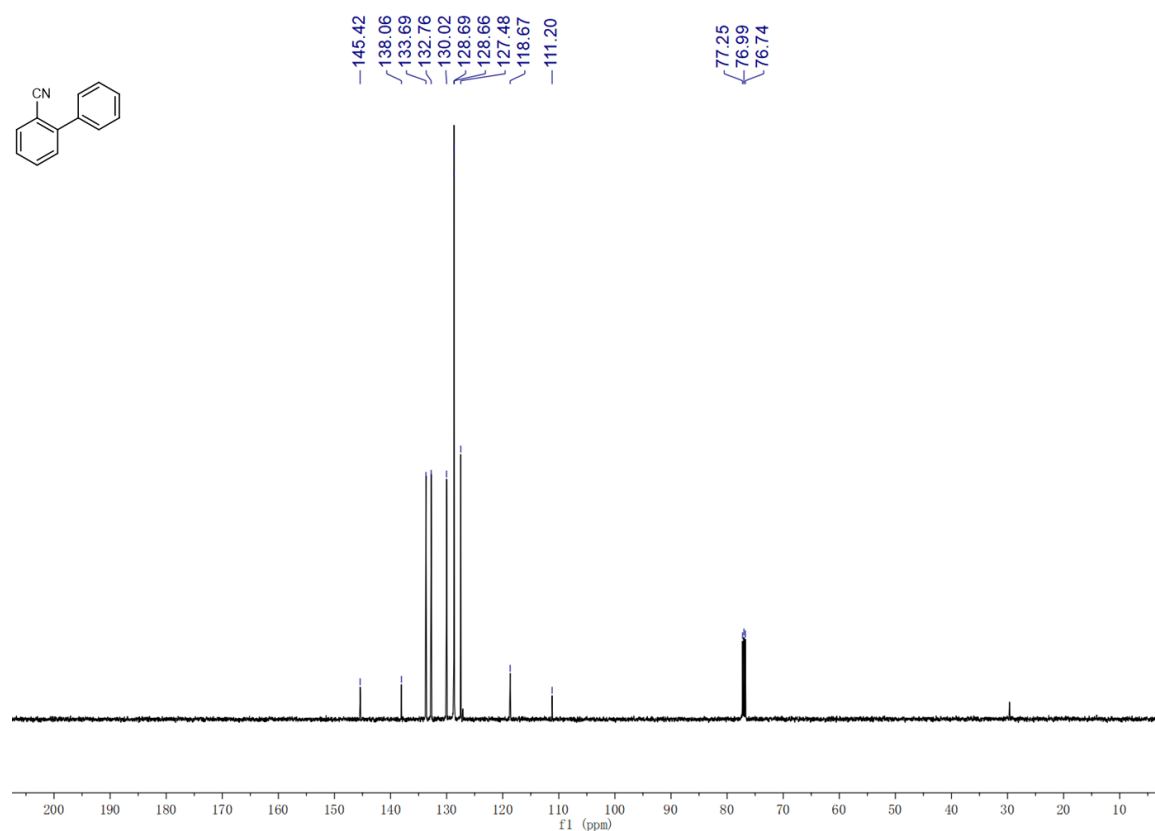

1132 <sup>1</sup>H and <sup>13</sup>C-NMR spectra of product 4q.

1133

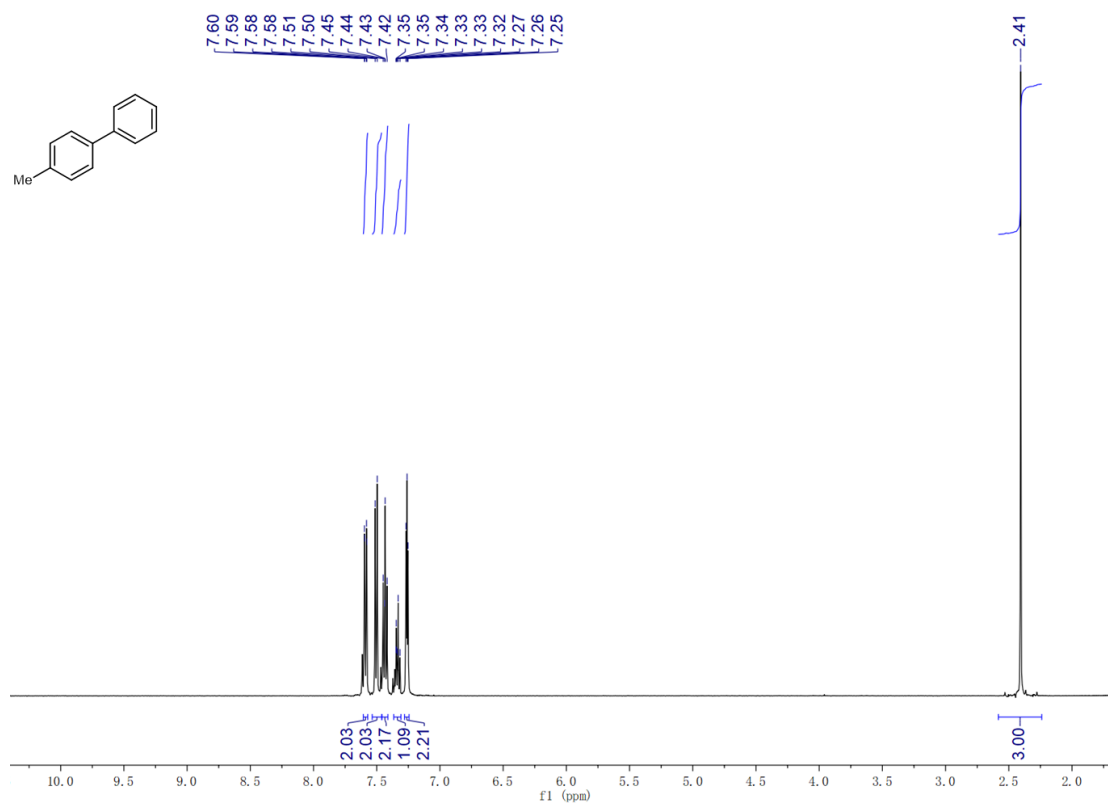

1134

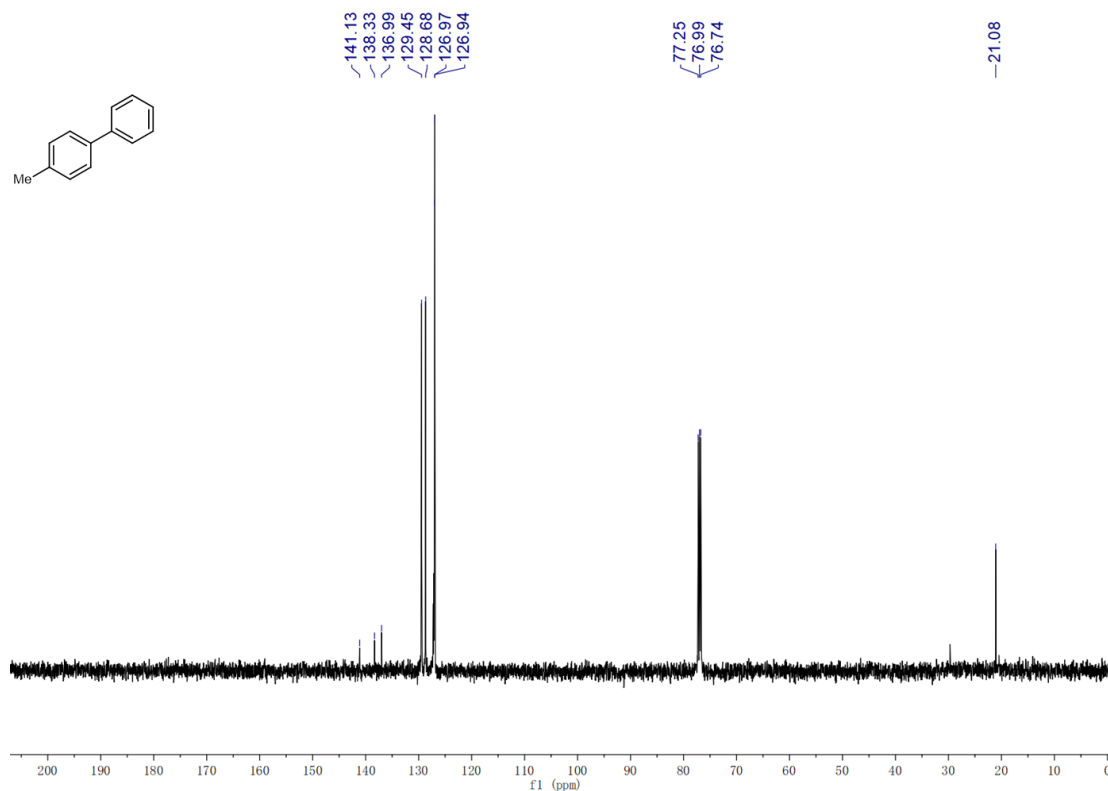

1135

1136

1137 <sup>1</sup>H and <sup>13</sup>C- NMR spectra of product 4r.

1138

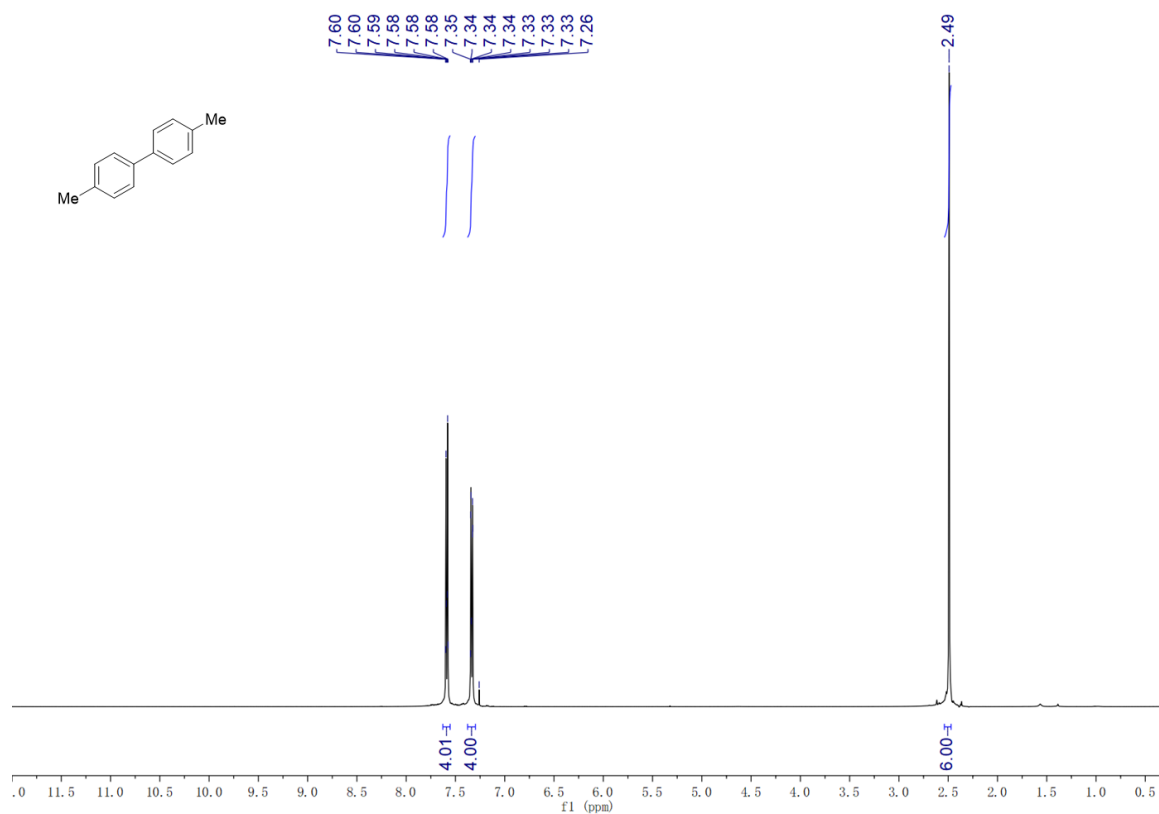

1139

1140

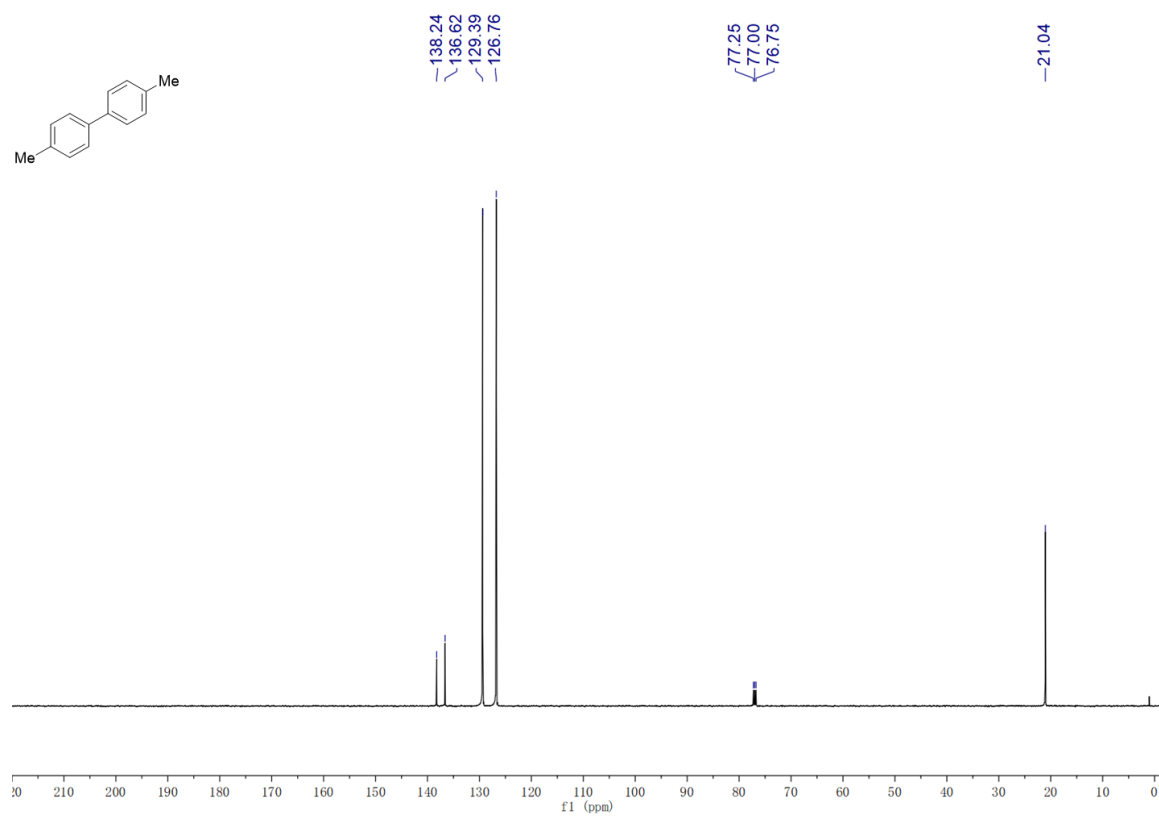

1141

1142 <sup>1</sup>H and <sup>13</sup>C-NMR spectra of product 4s.

1143

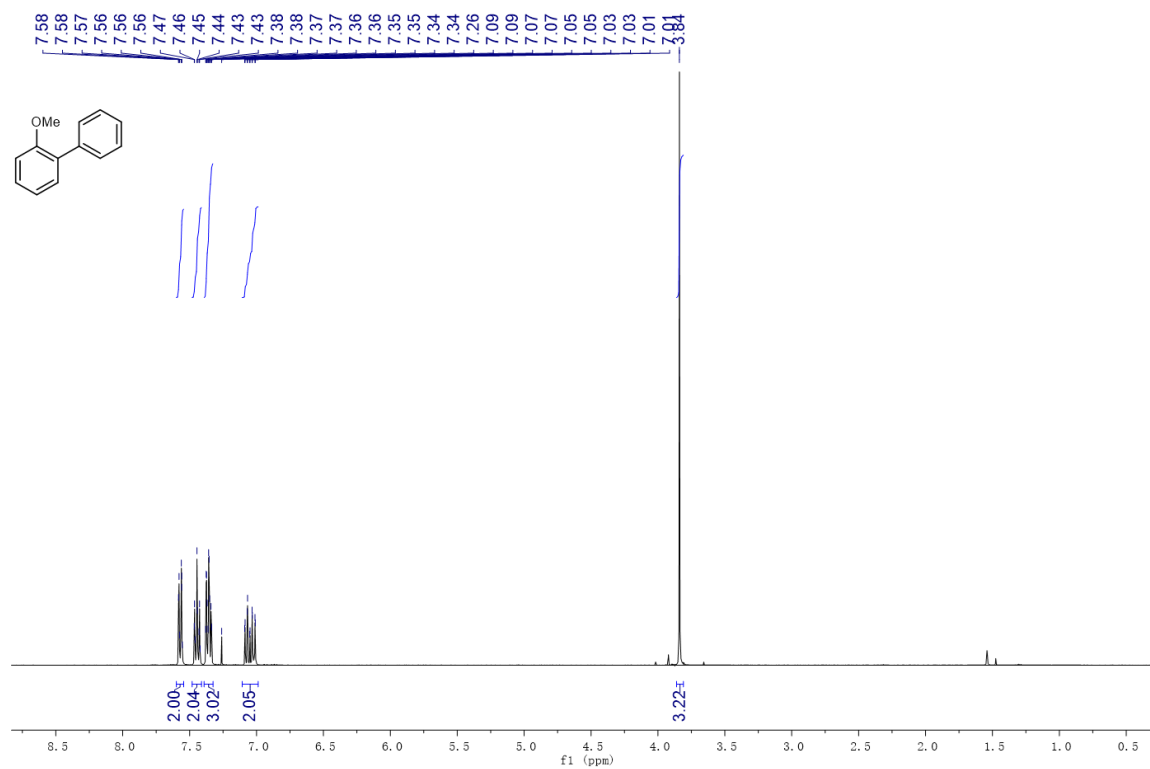

1144

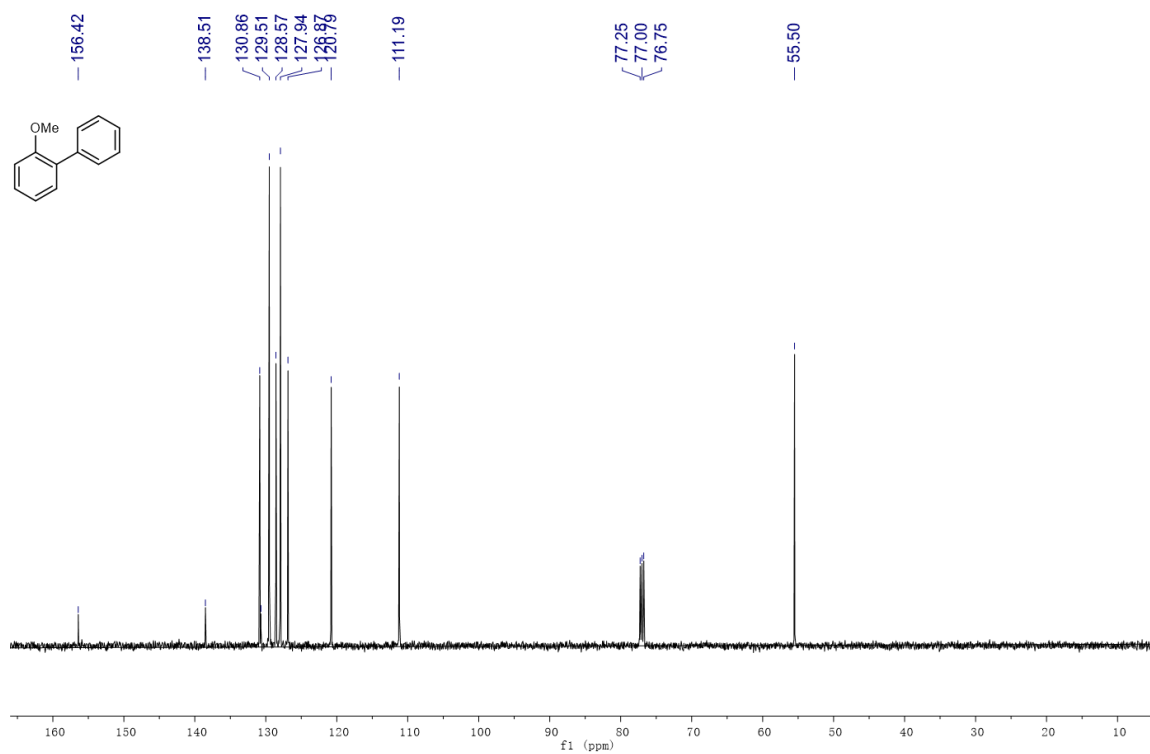

1145

1146



1147 <sup>1</sup>H and <sup>13</sup>C-NMR spectra of product 4t.

1148

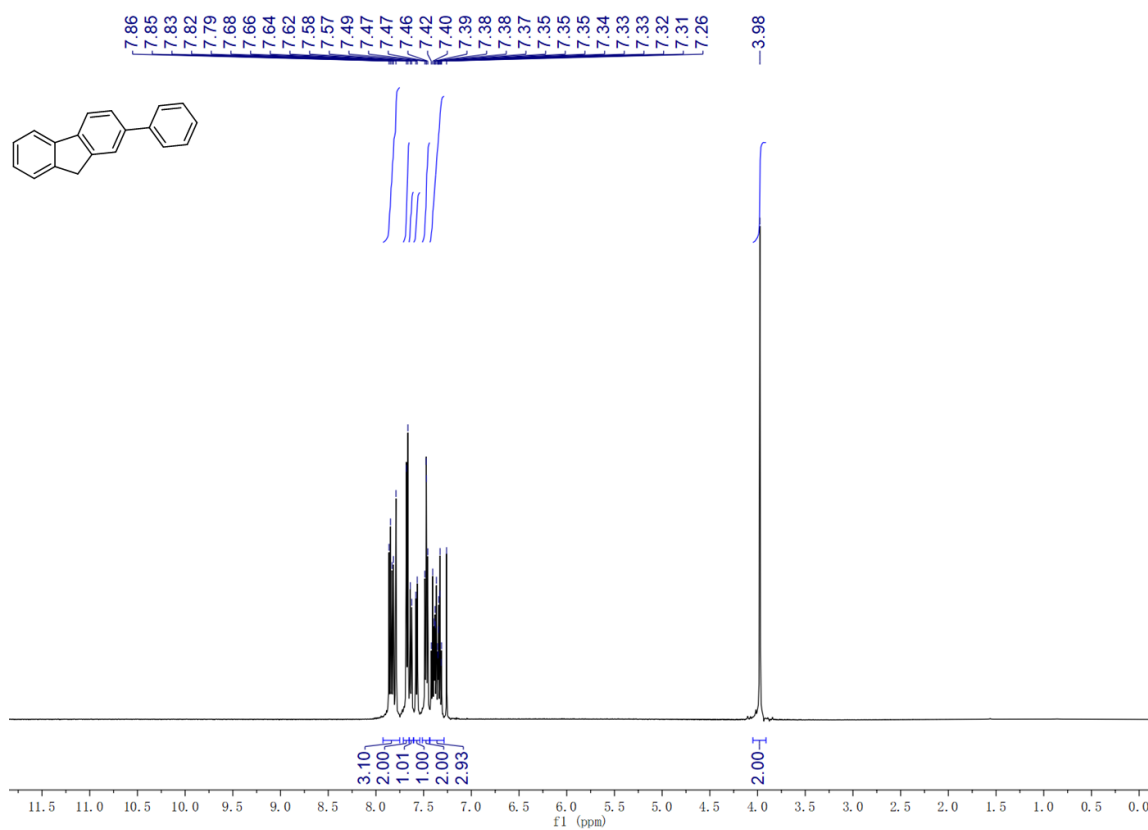

1149

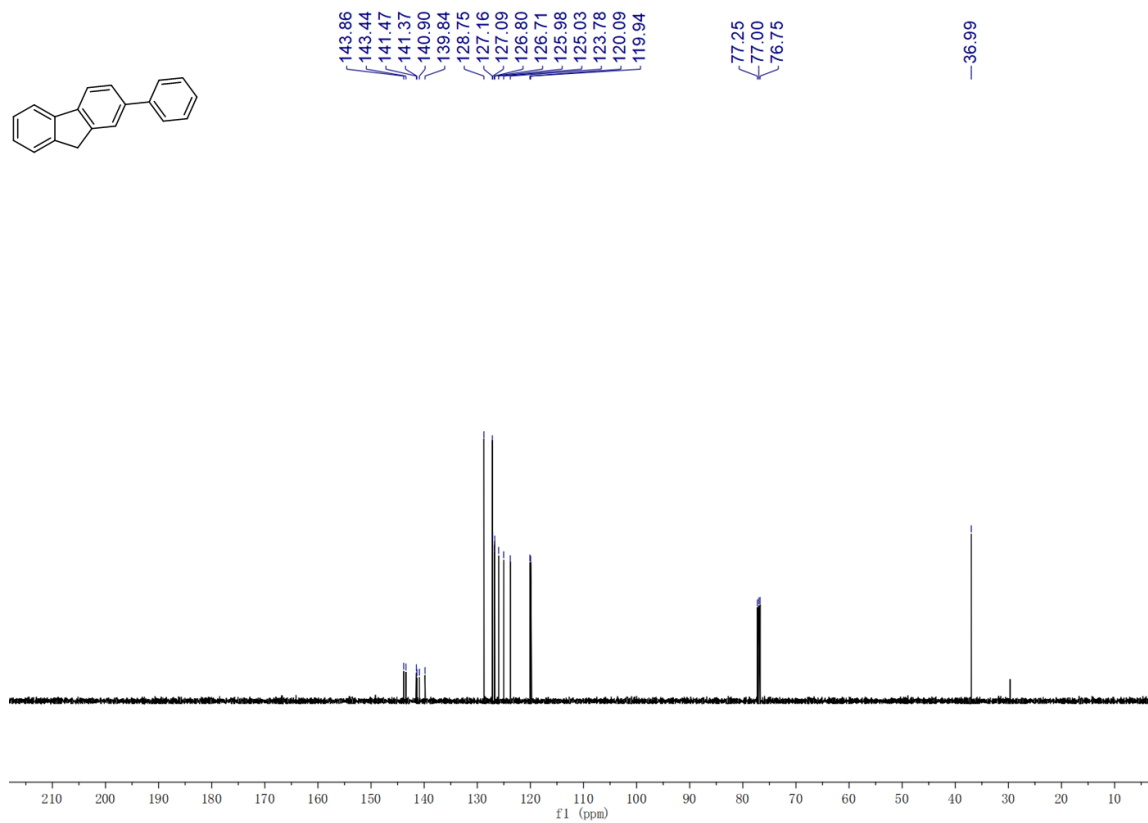

1150

1151

1152 **<sup>1</sup>H and <sup>13</sup>C-NMR spectra of product 4u.**

1153

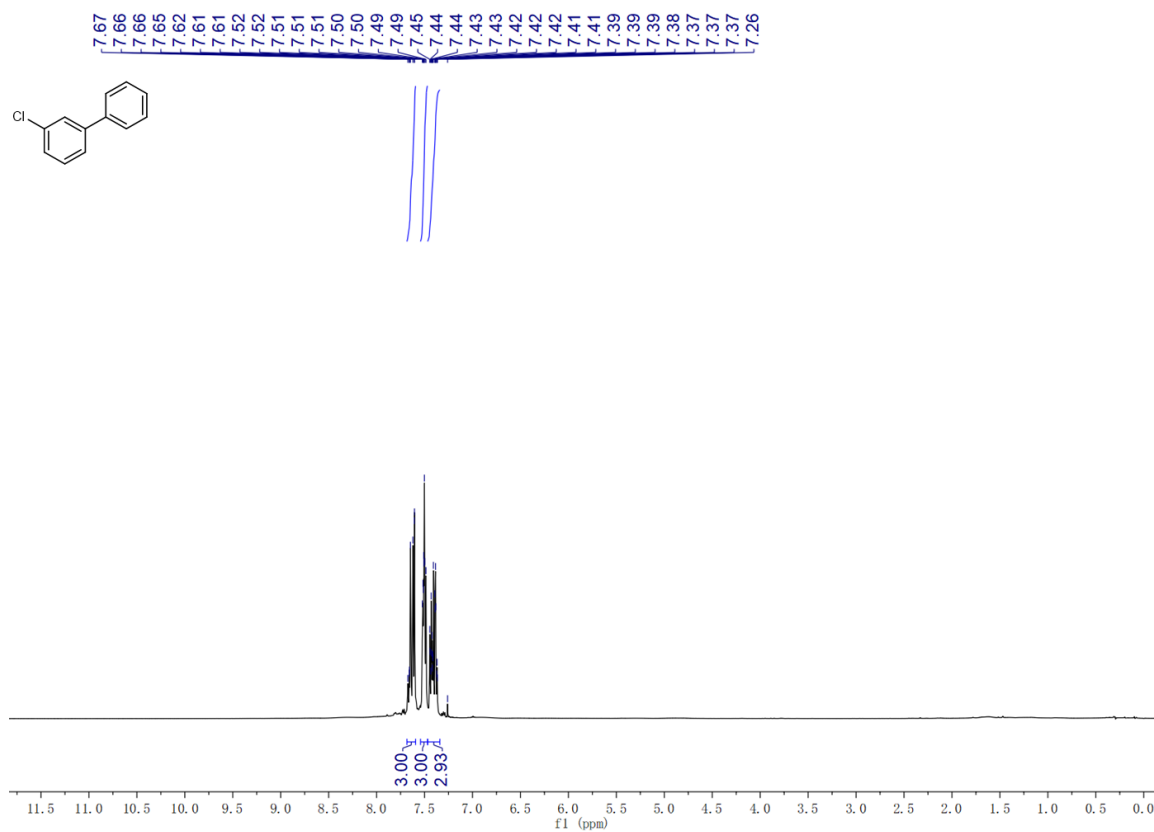

1154

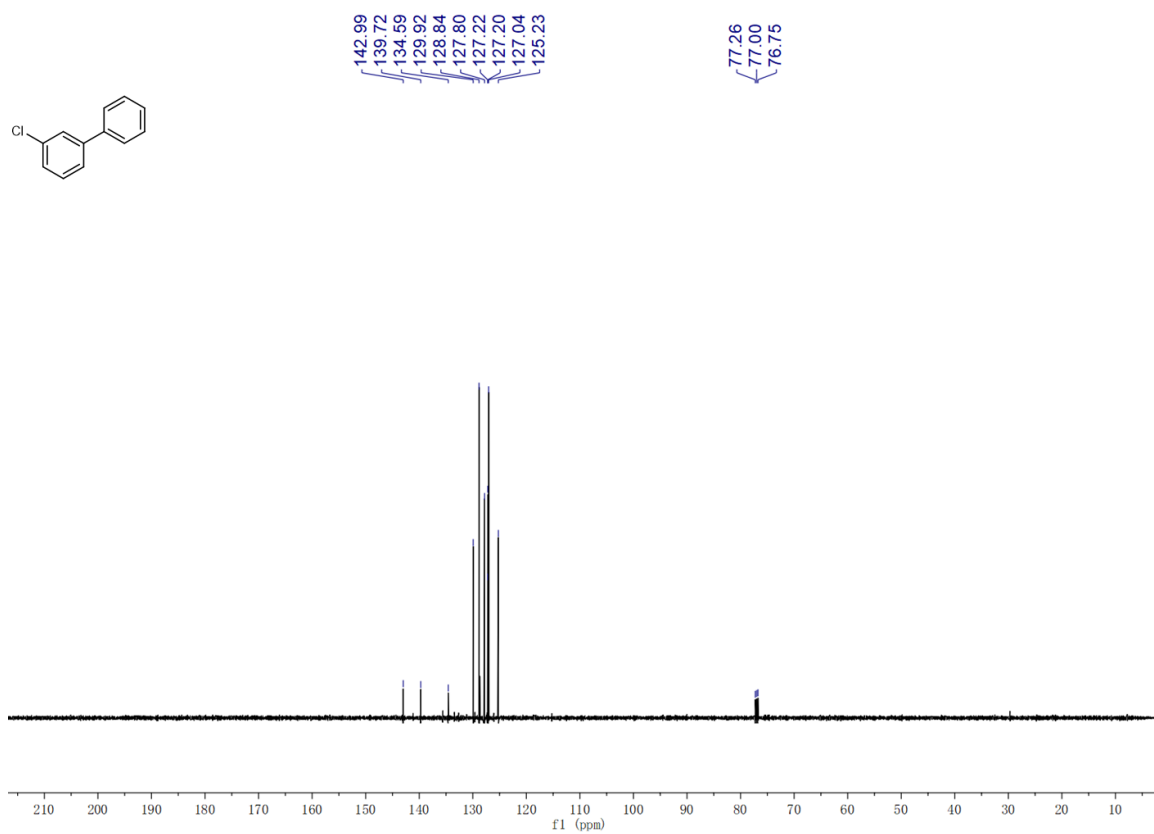

1155

1156 <sup>1</sup>H and <sup>13</sup>C- NMR spectra of product 4v.

1157

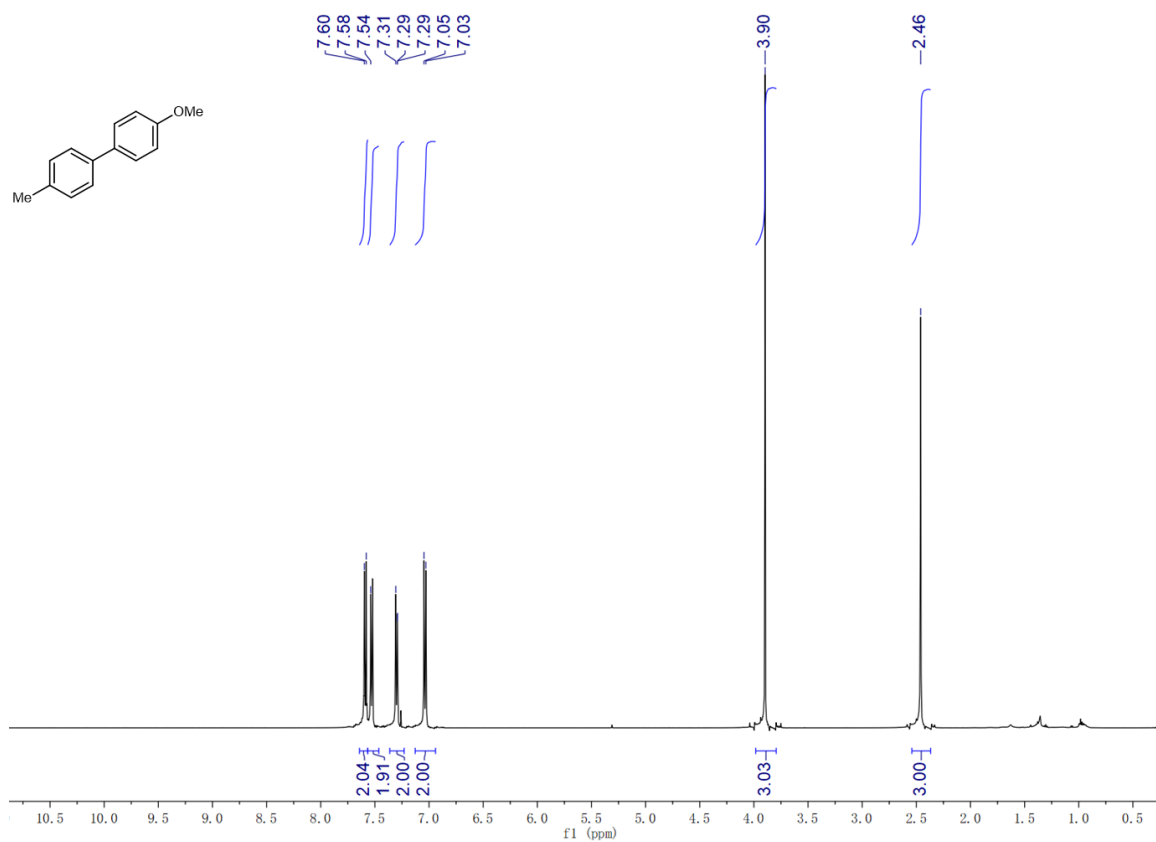

1158

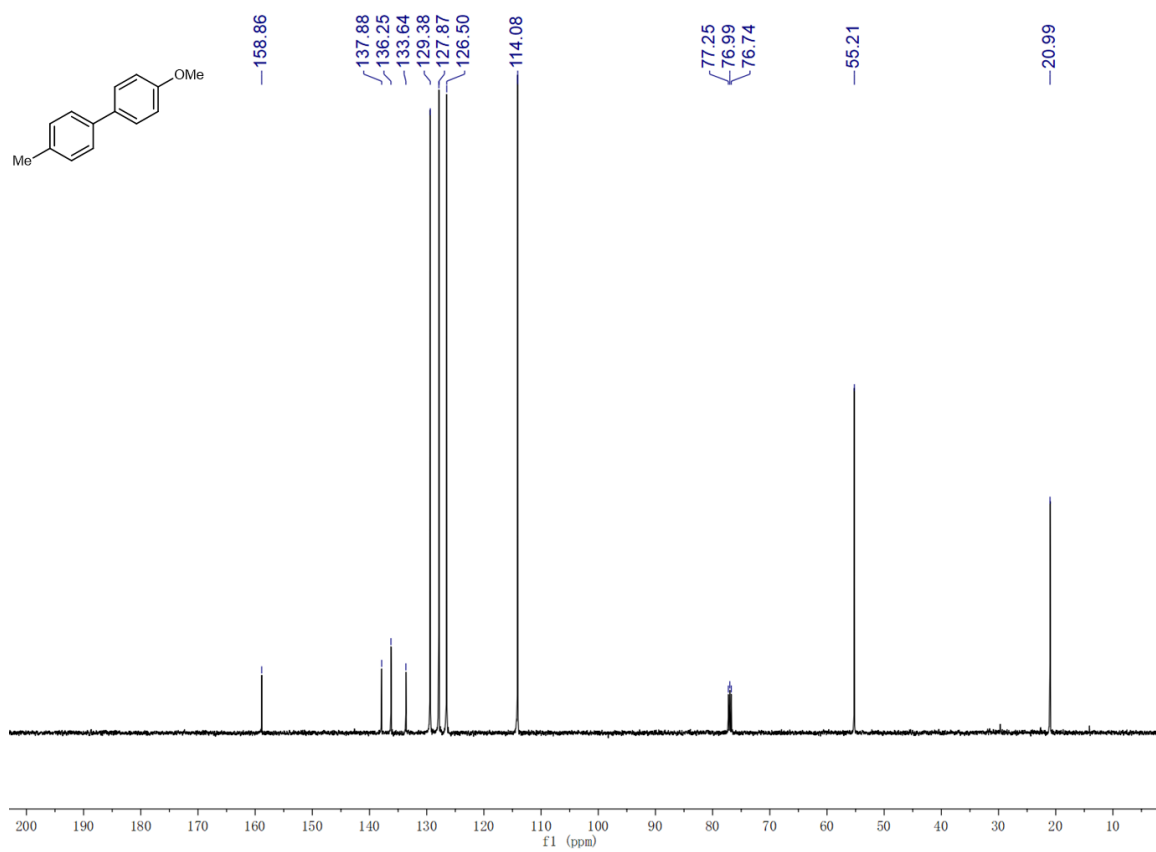

1159 <sup>1</sup>H and <sup>13</sup>C-NMR spectra of product 4w.

1160

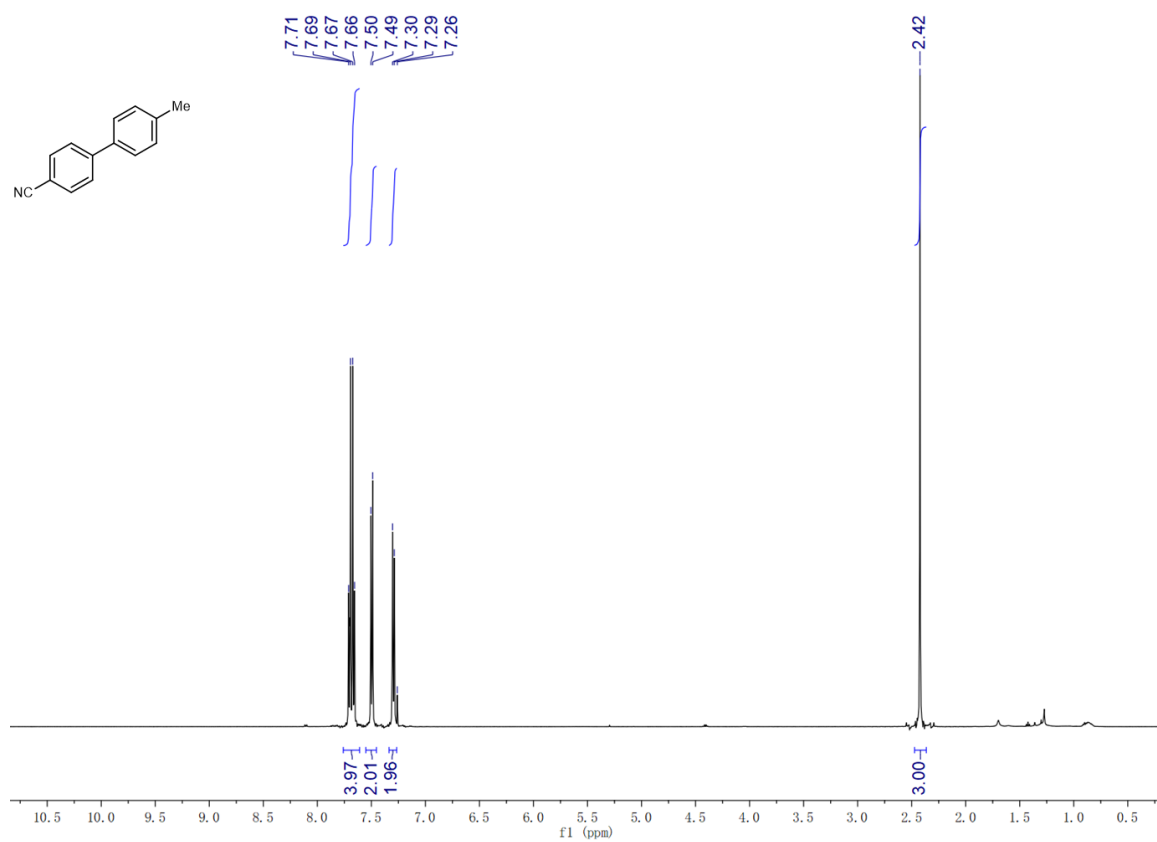

1161

1162

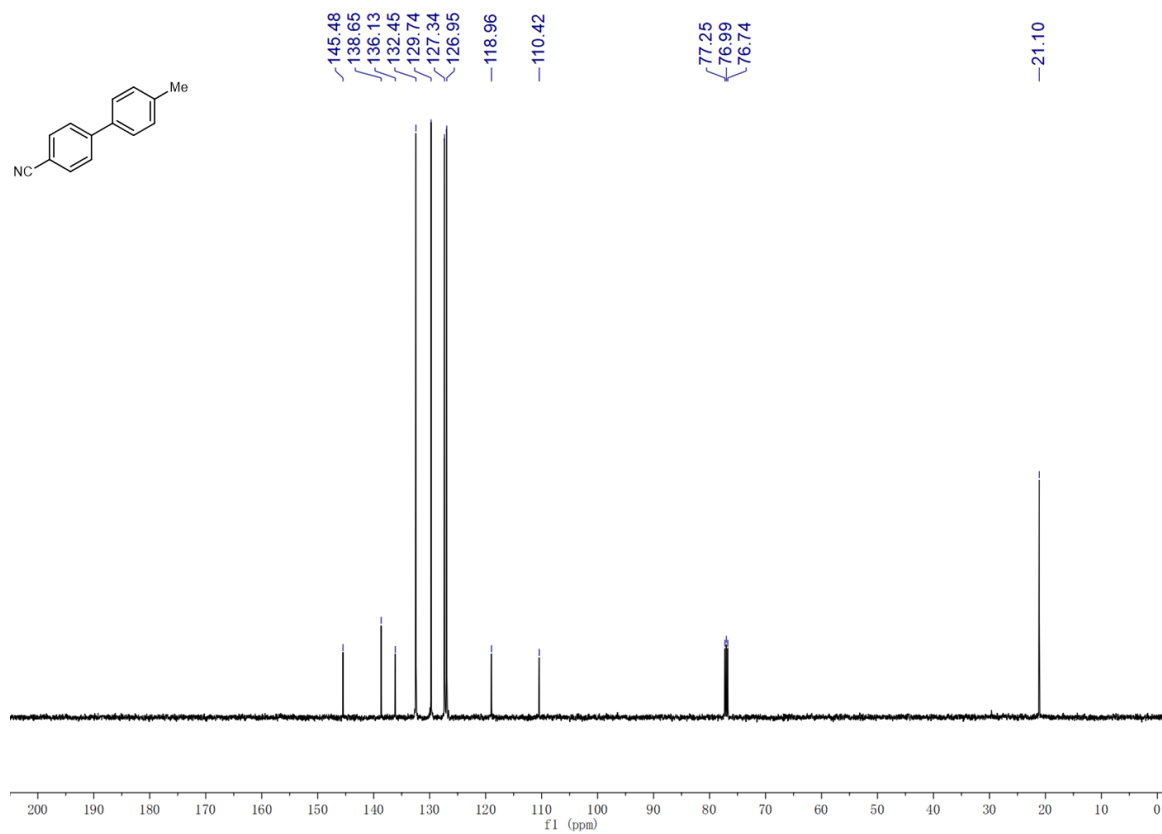

1163 <sup>1</sup>H and <sup>13</sup>C-NMR spectra of product 4x.

1164

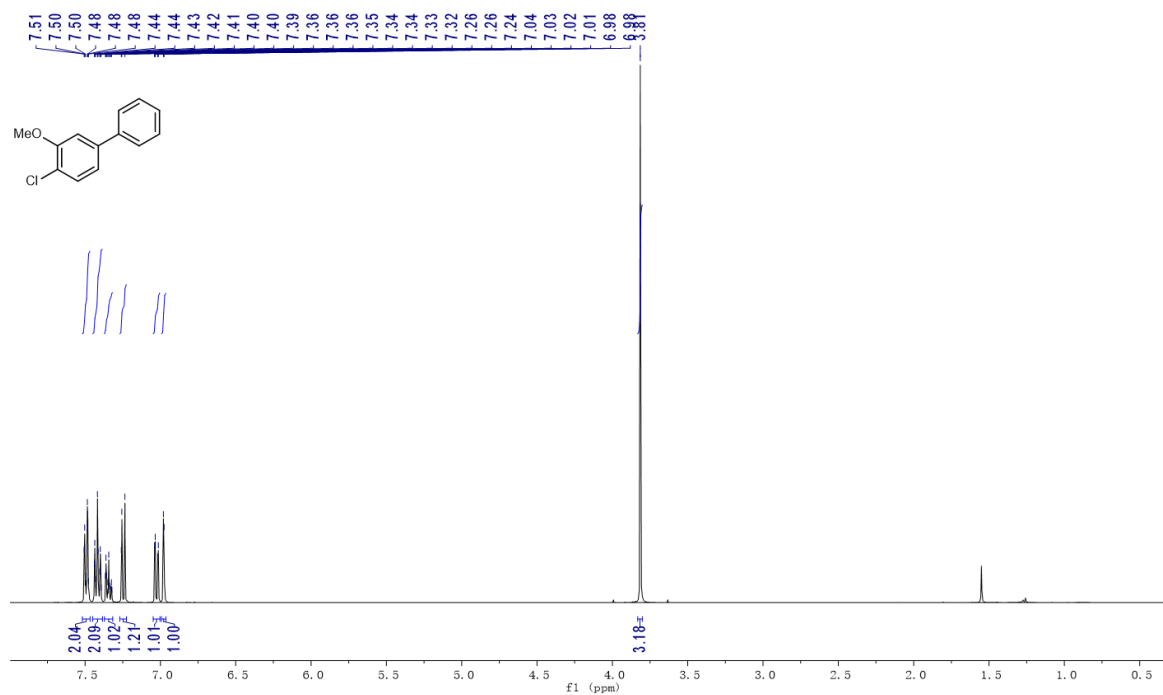

1165

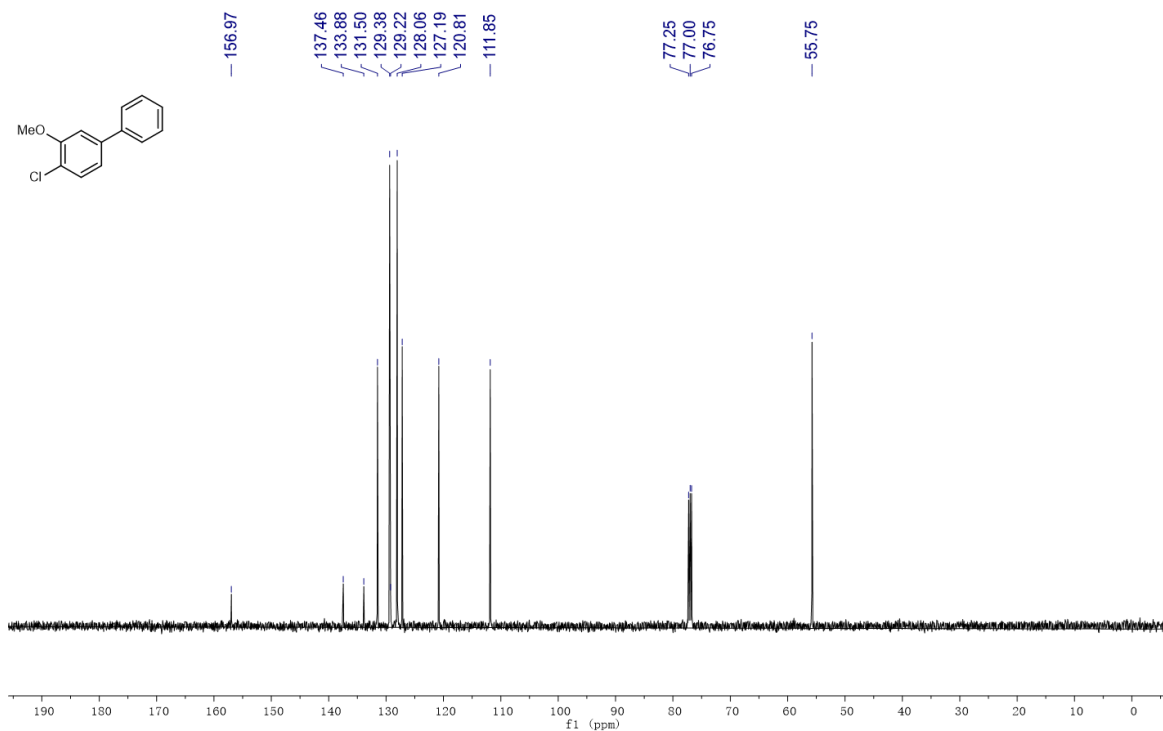

1166

1167

1168 <sup>1</sup>H and <sup>13</sup>C-NMR spectra of product 4y.

1169

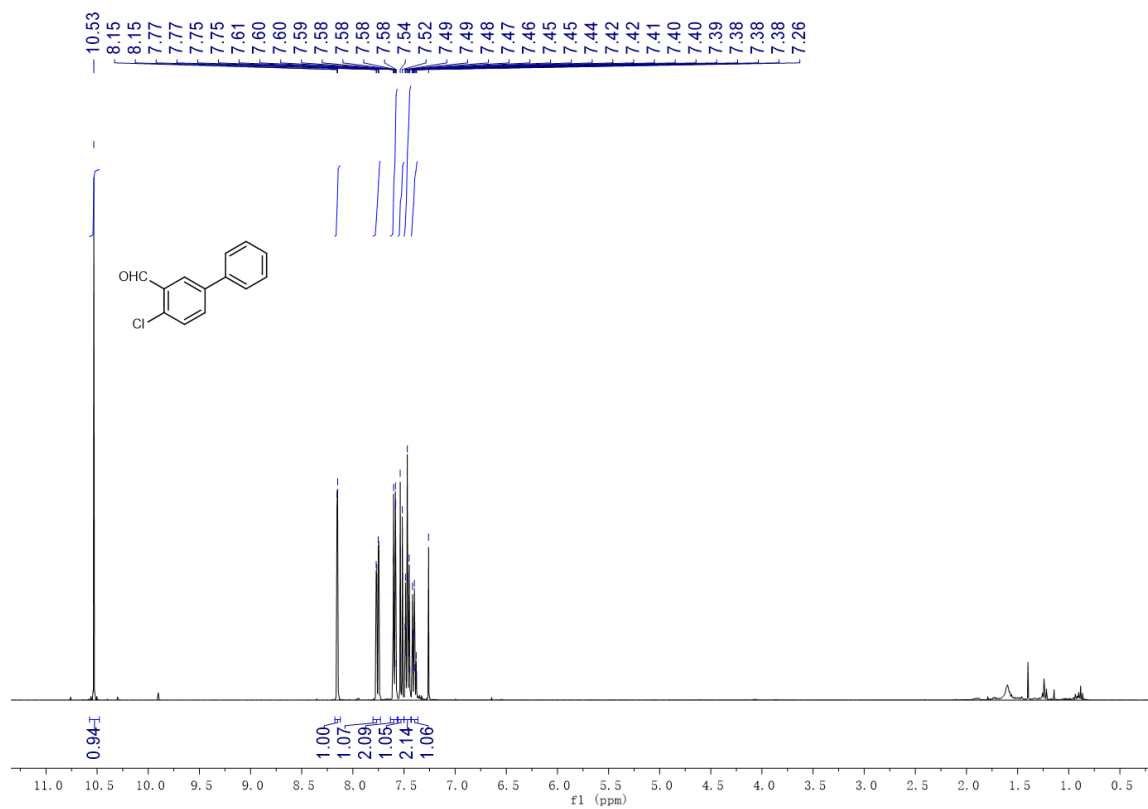

1170

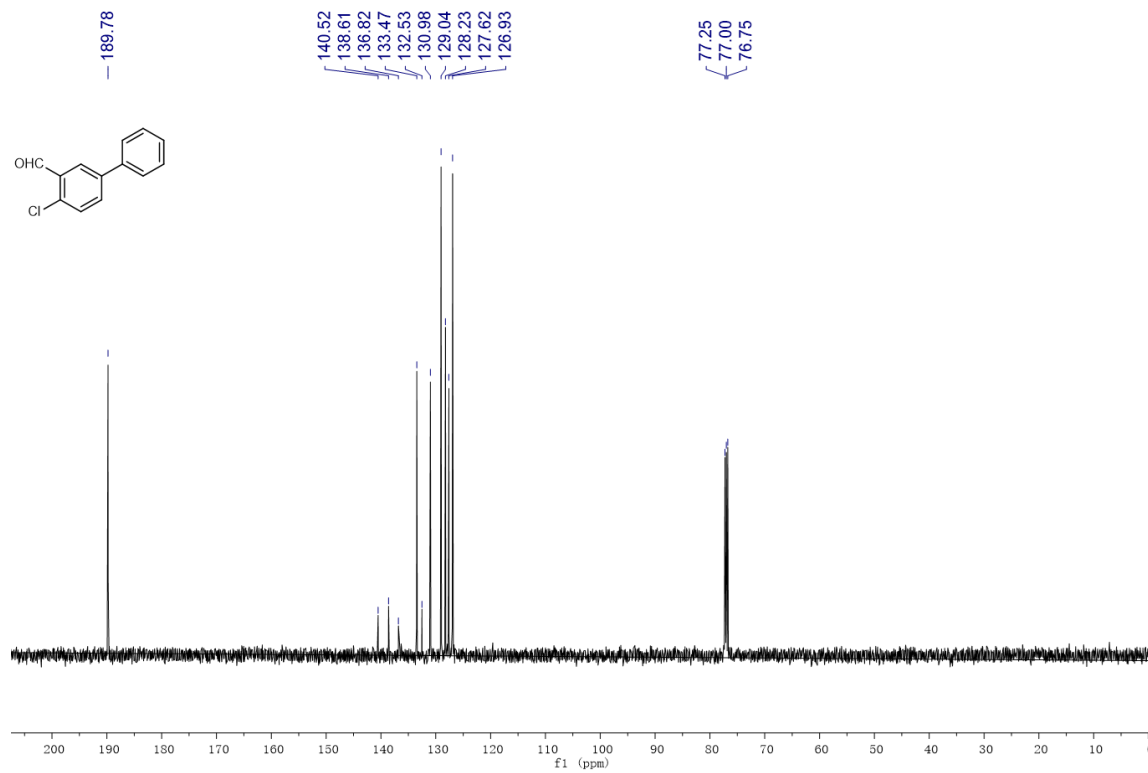

1171

1172

1173

1174 <sup>1</sup>H and <sup>13</sup>C-NMR spectra of product 4z.

1175

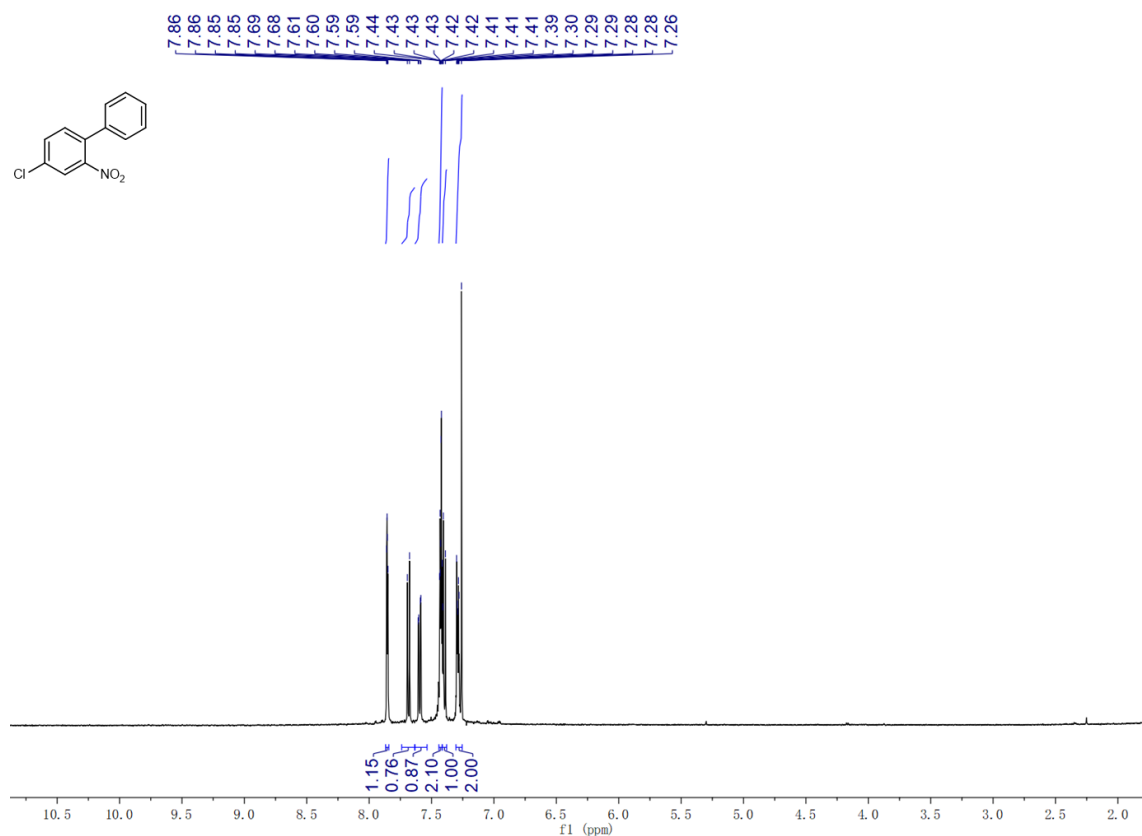

1176

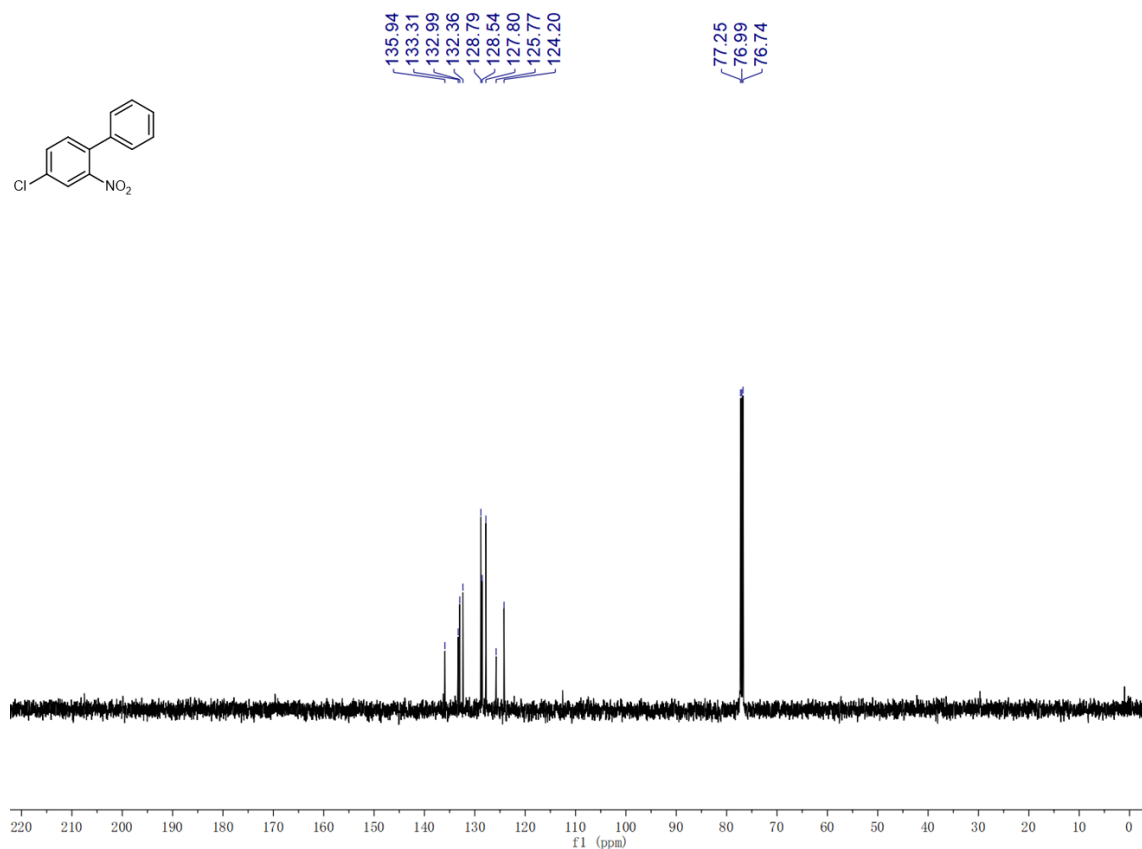

1177

1178 <sup>1</sup>H and <sup>13</sup>C-NMR spectra of product 4aa.

1179

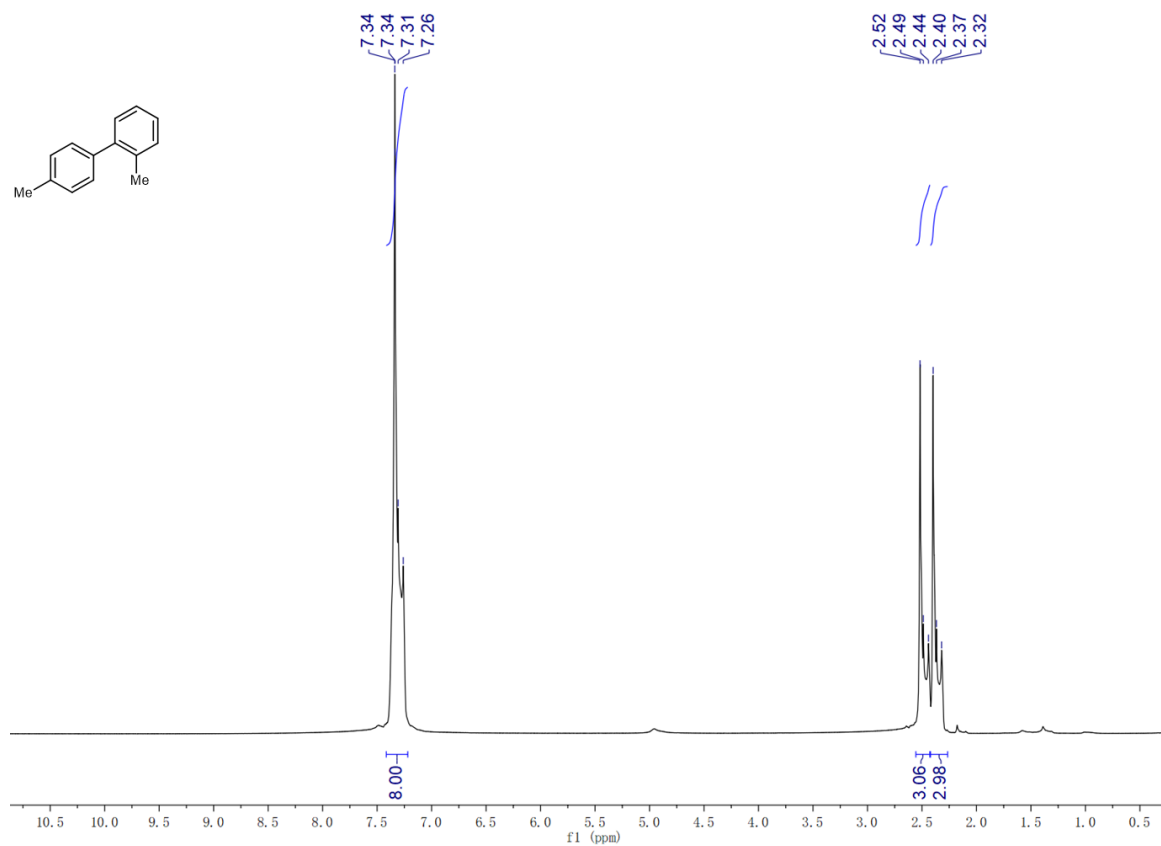

1180

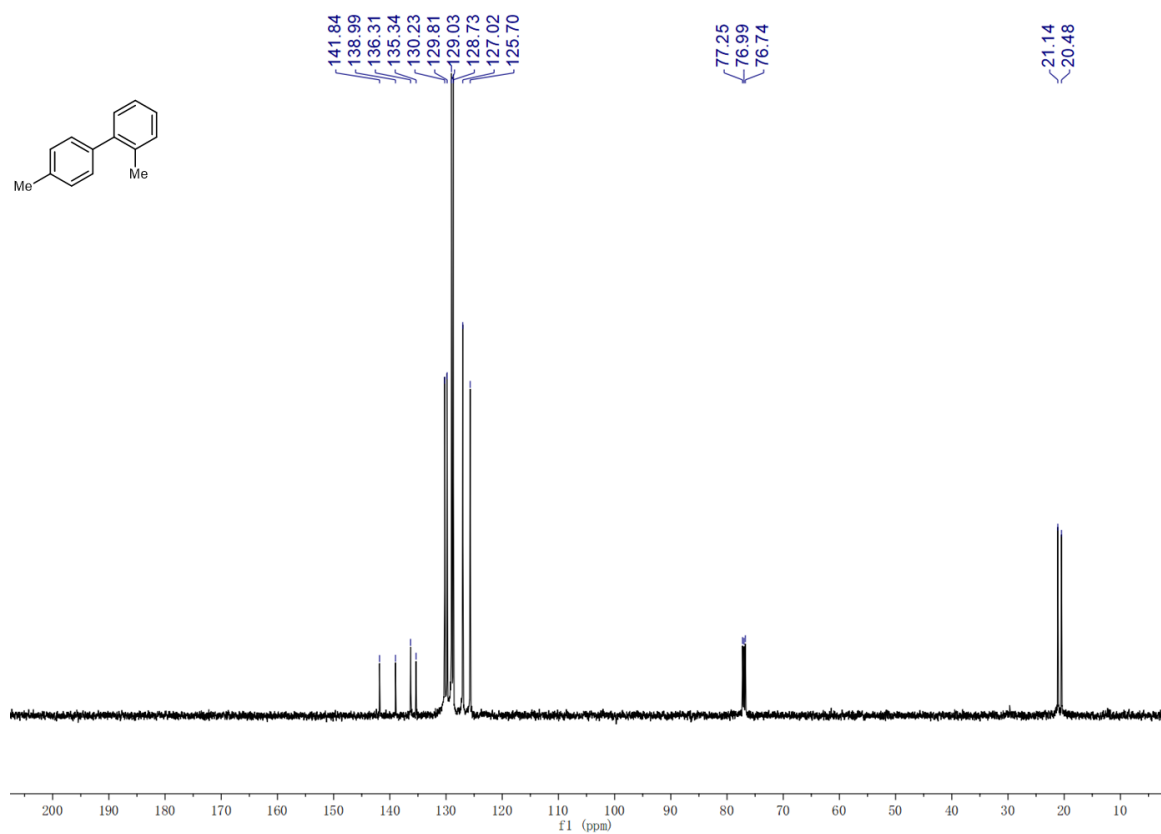



1181 <sup>1</sup>H and <sup>13</sup>C-NMR spectra of product 4ab.

1182

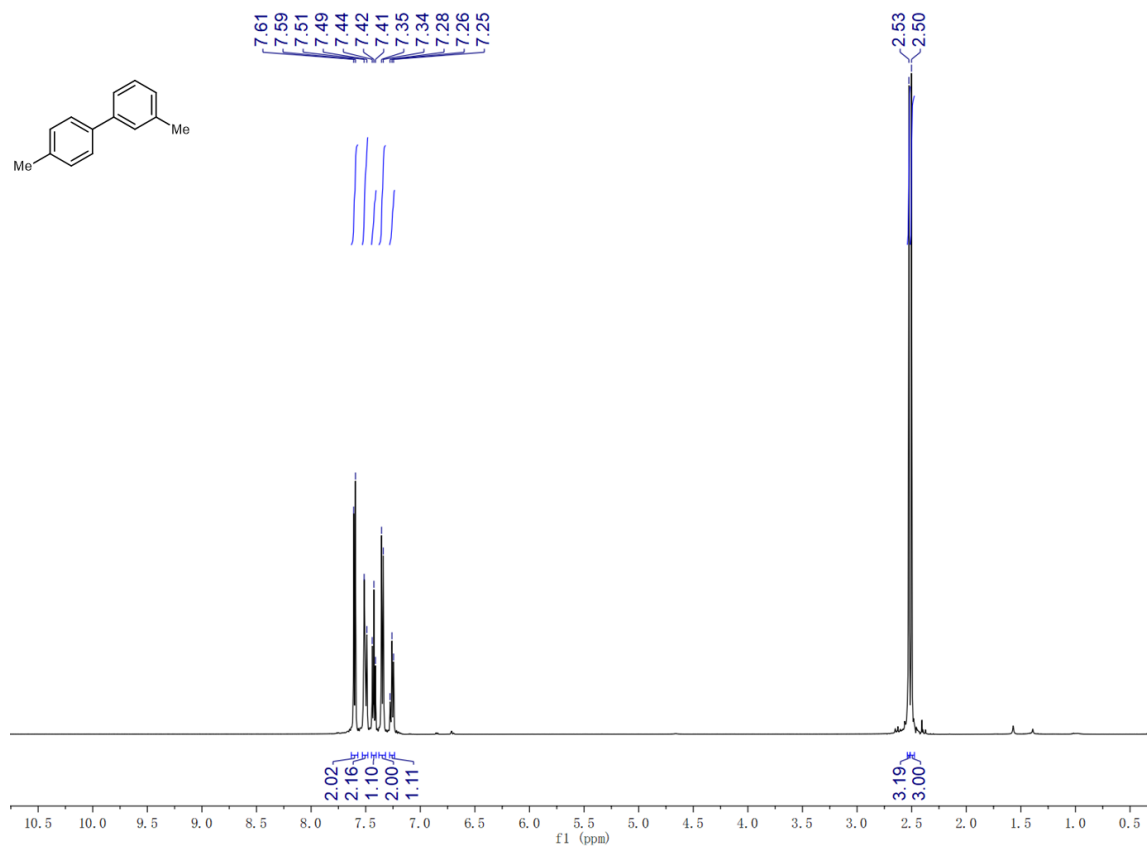

1183

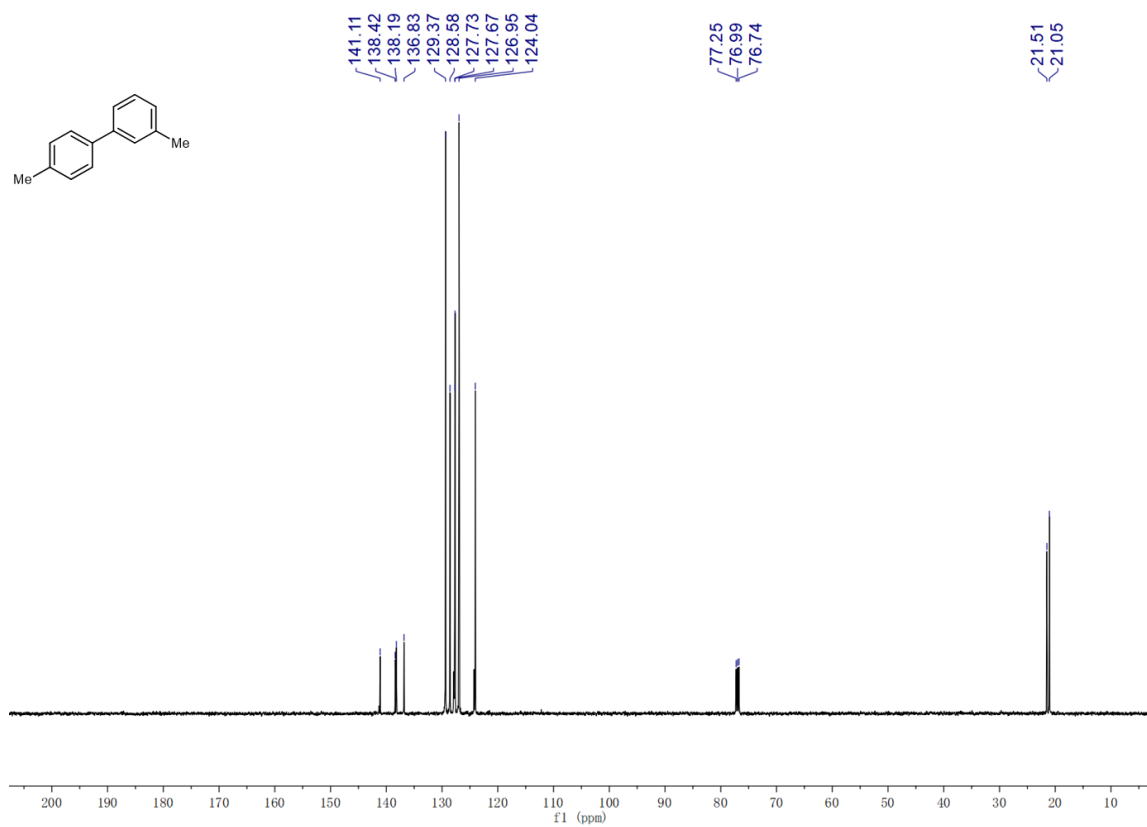

1184

1185 <sup>1</sup>H and <sup>13</sup>C-NMR spectra of product 4ac.

1186

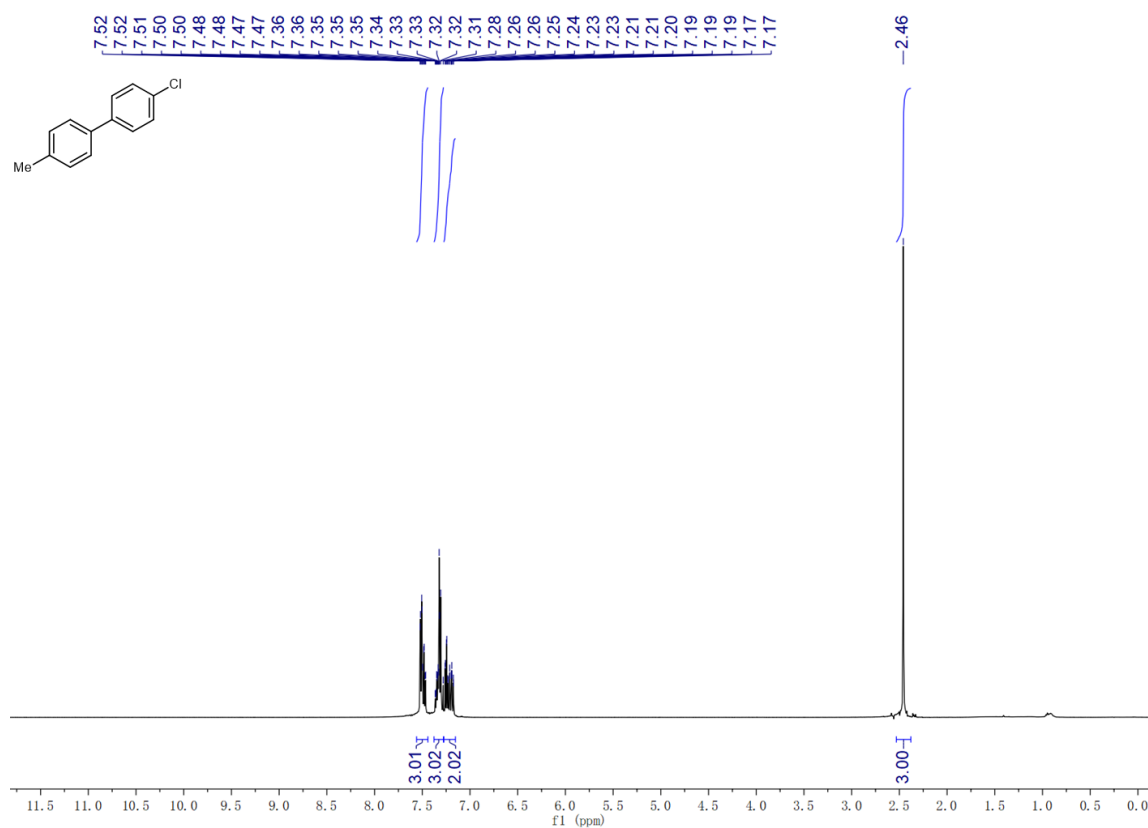

1187

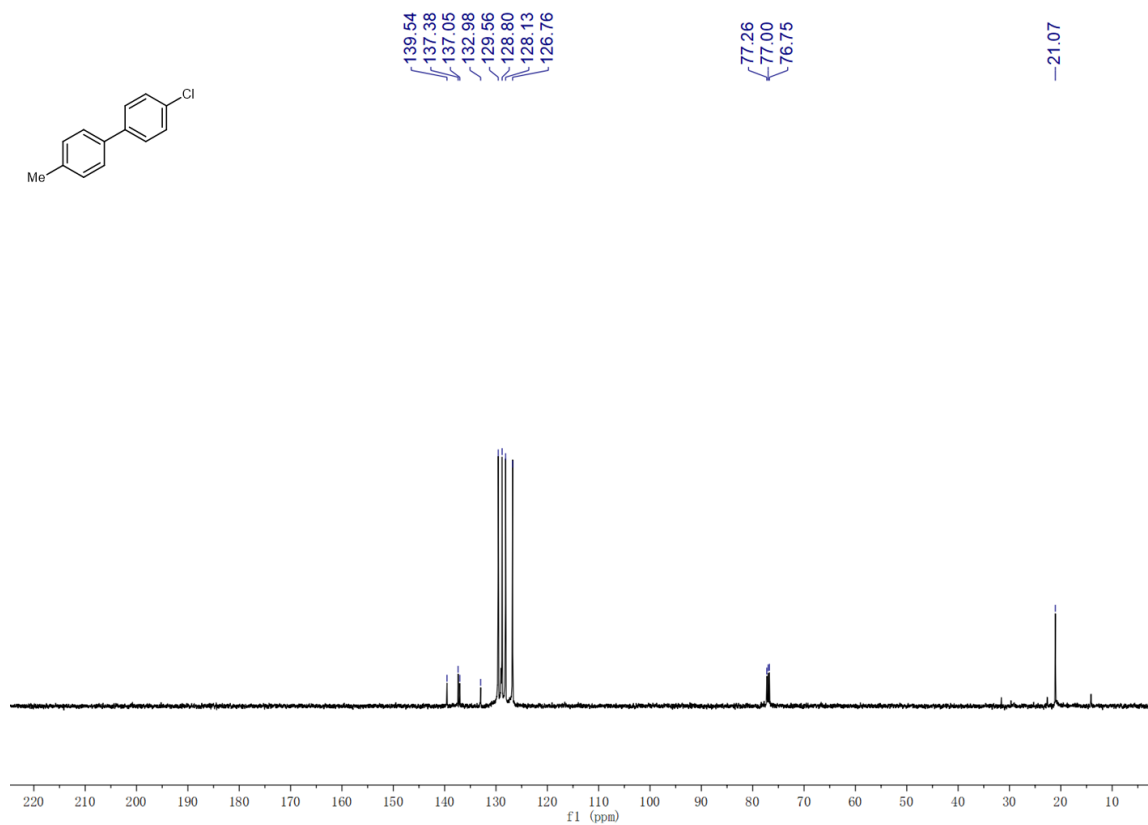

1188

1189

1190 <sup>1</sup>H and <sup>13</sup>C, <sup>19</sup>F-NMR spectra of product 4ad.

1191

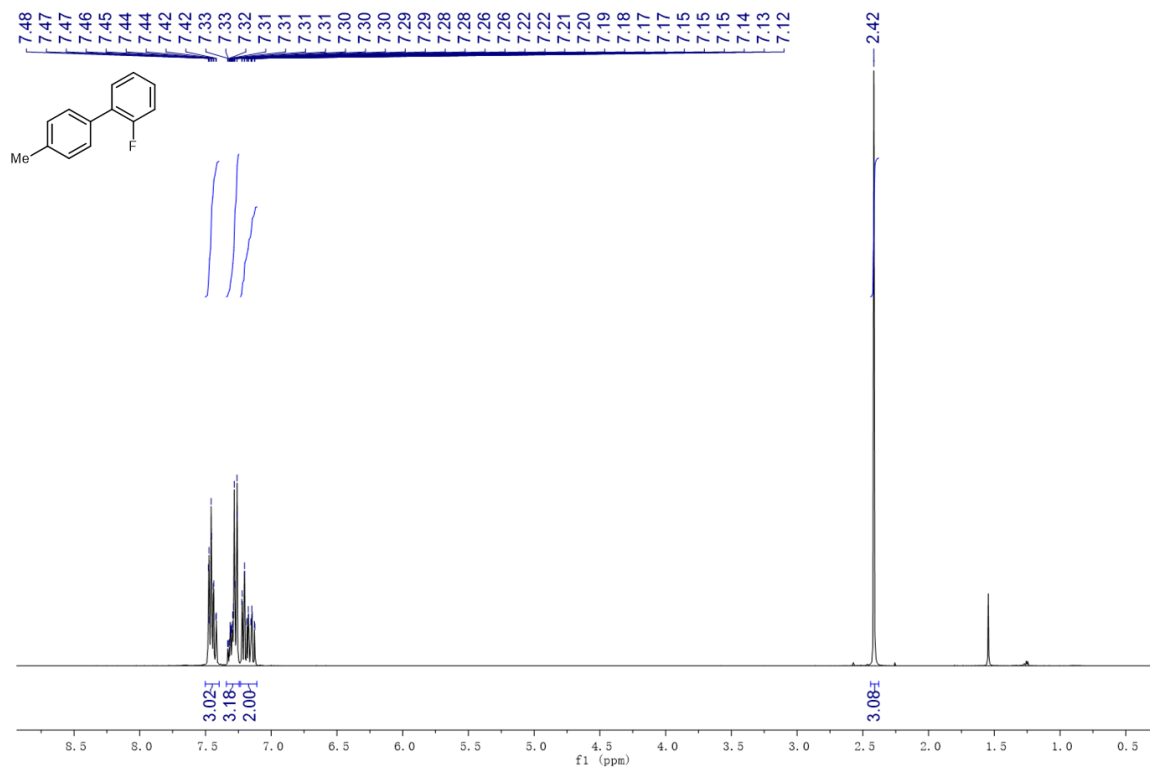

1192

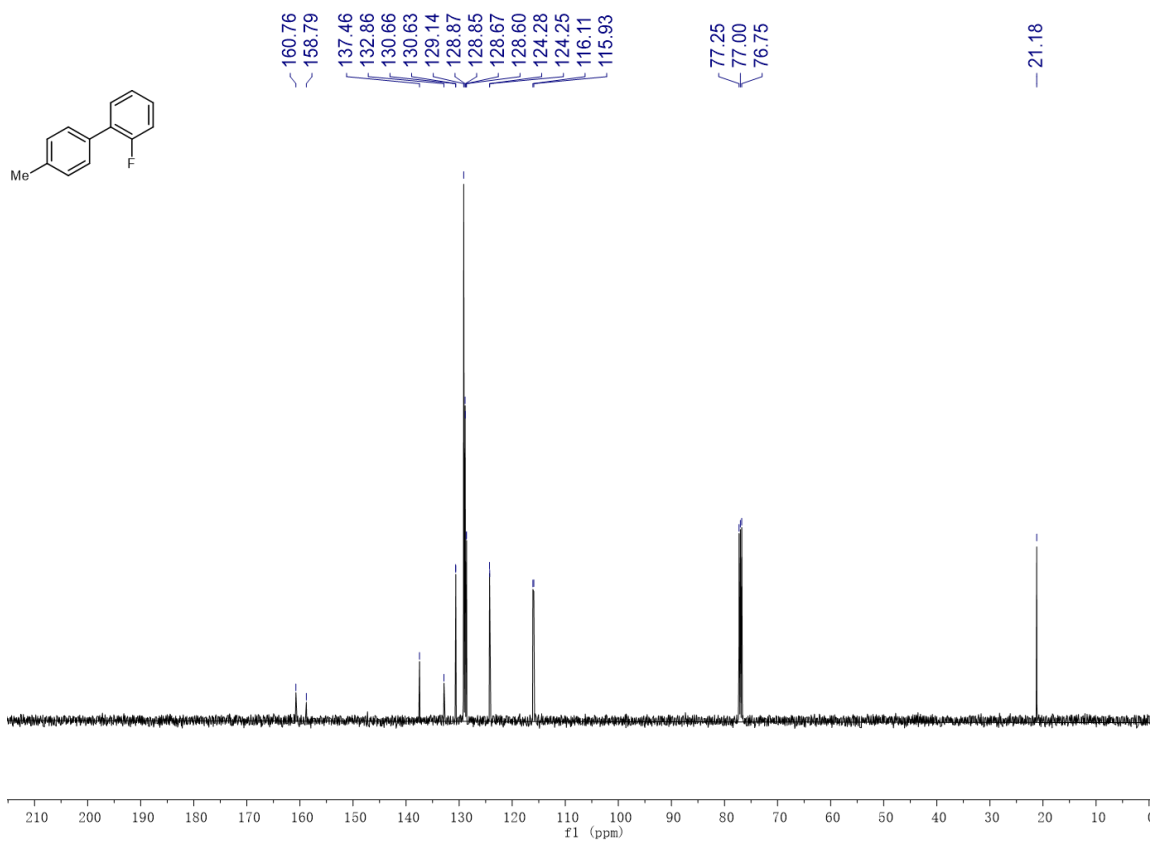

1193

1194

1195

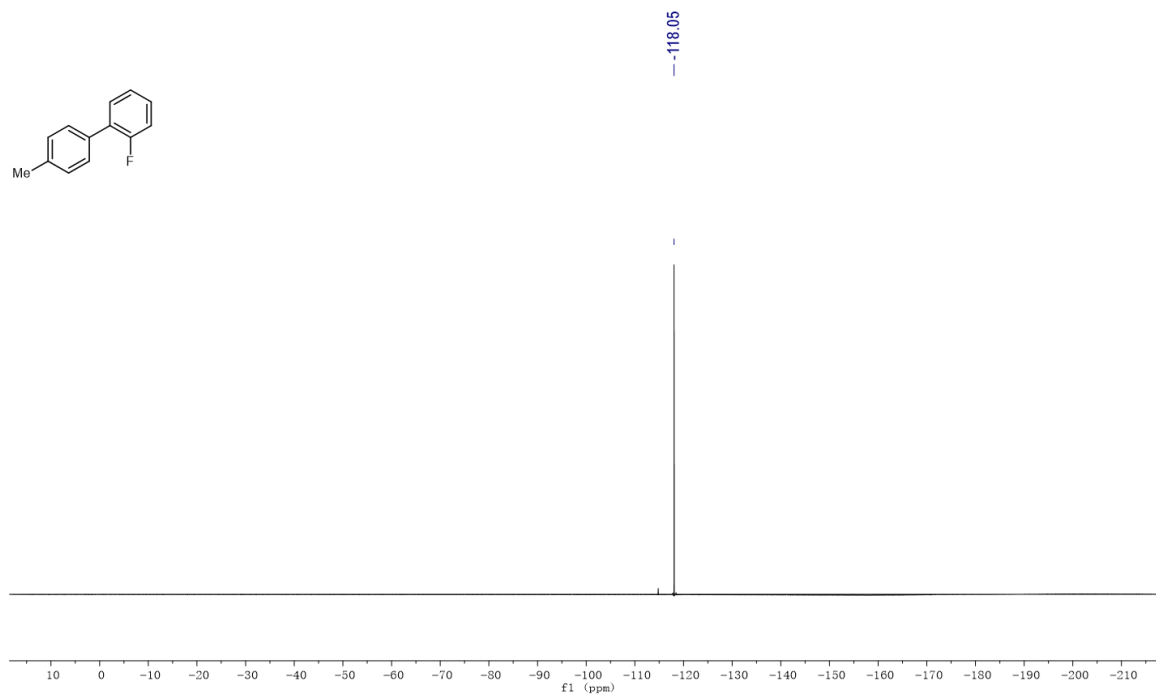

1196

1197

1198 <sup>1</sup>H and <sup>13</sup>C-NMR spectra of product 5a.

1199

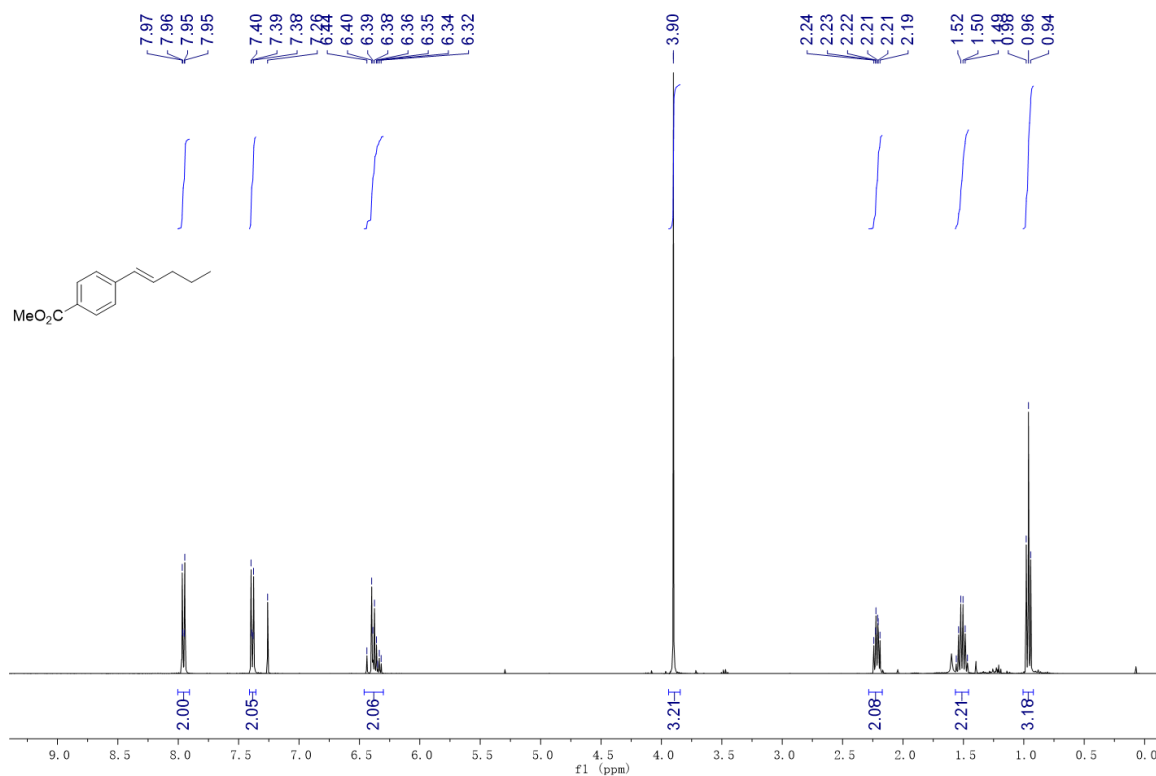

1200

1201

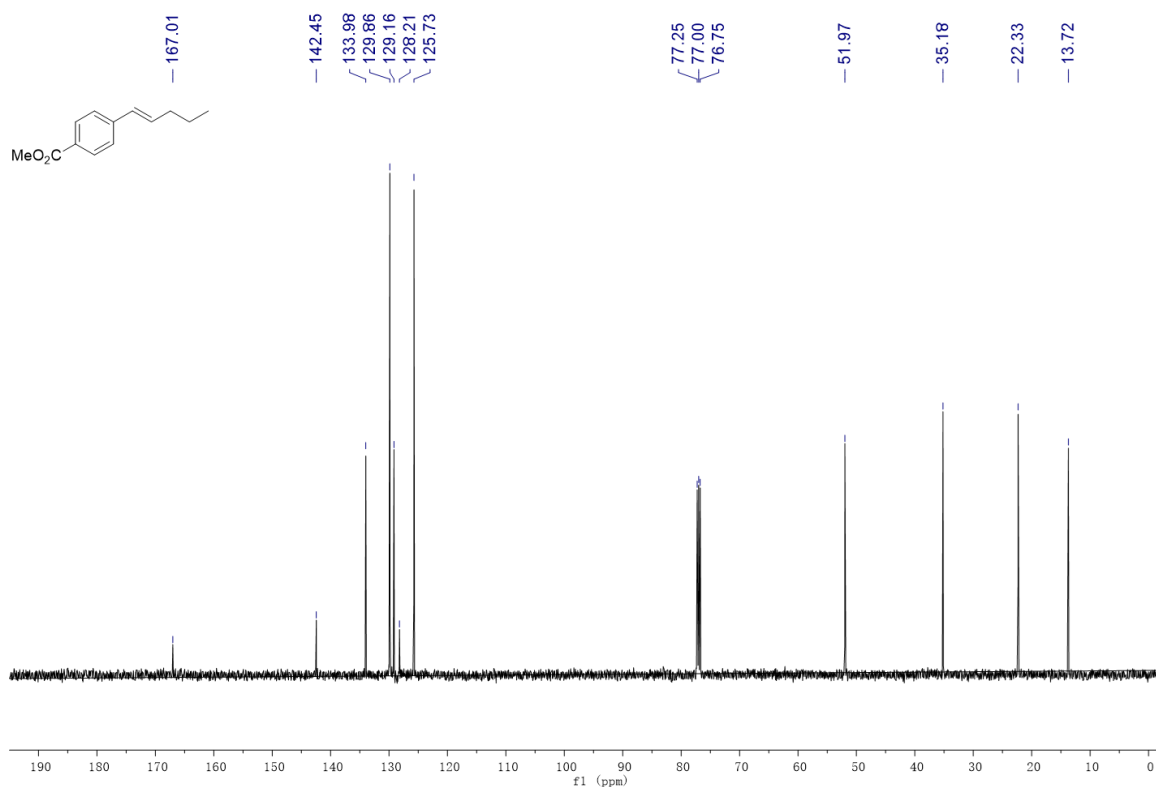

1202

1203

1204

1205 <sup>1</sup>H and <sup>13</sup>C-NMR spectra of product 5b.

1206

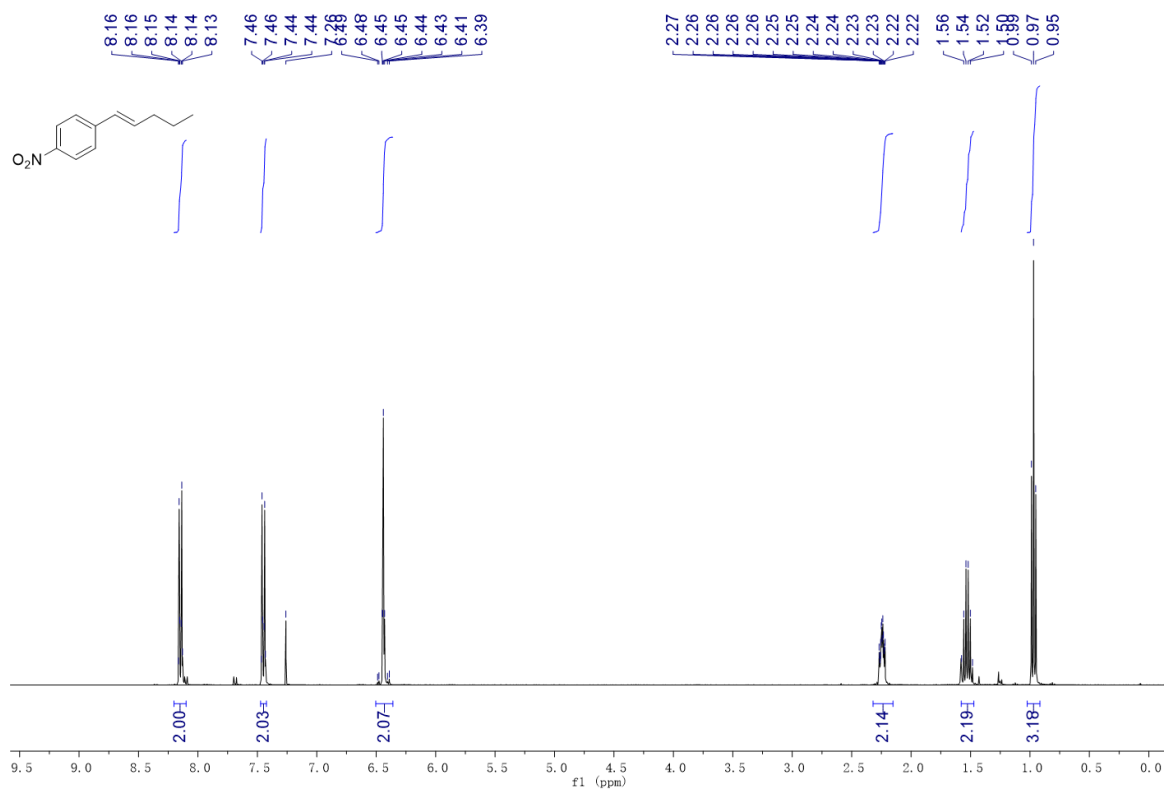

1207

1208

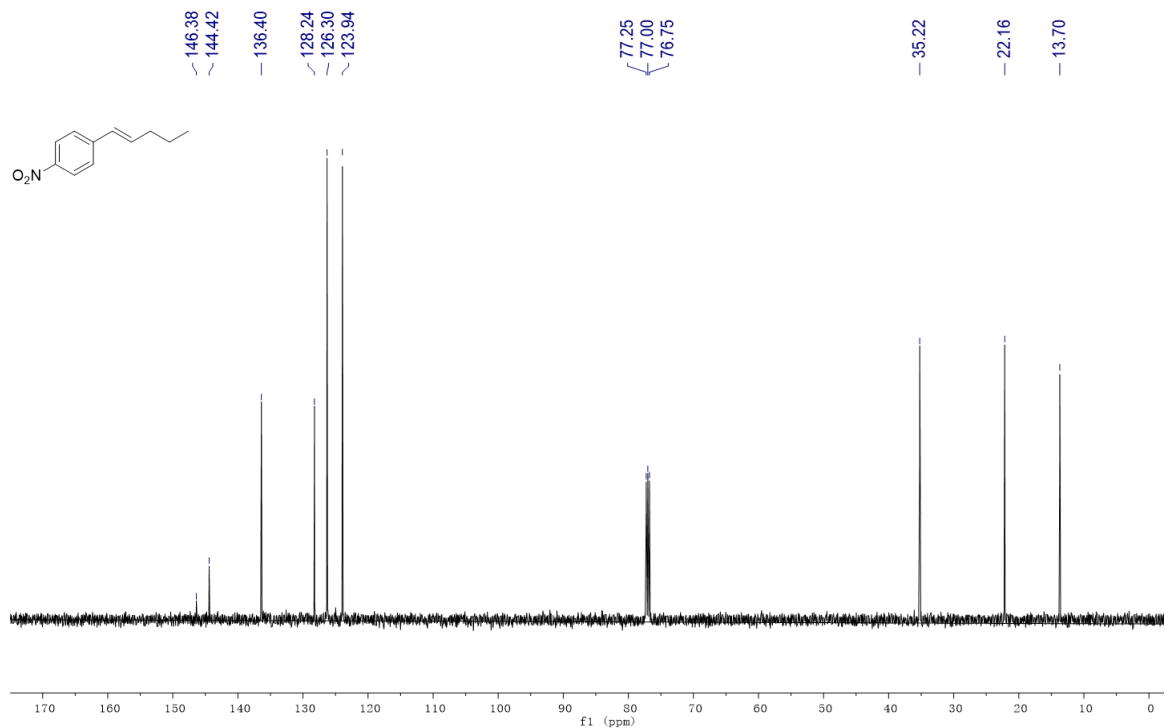

1209

1210

1211 <sup>1</sup>H and <sup>13</sup>C-NMR spectra of product 5c.

1212

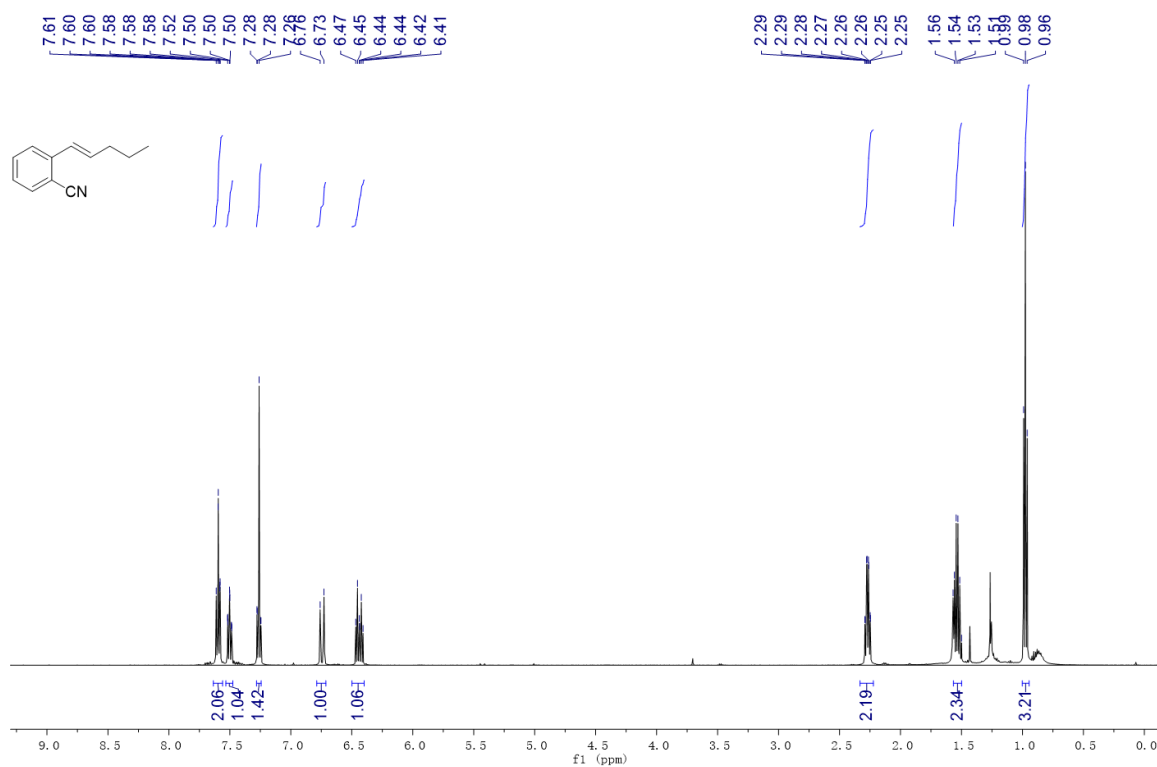

1213

1214

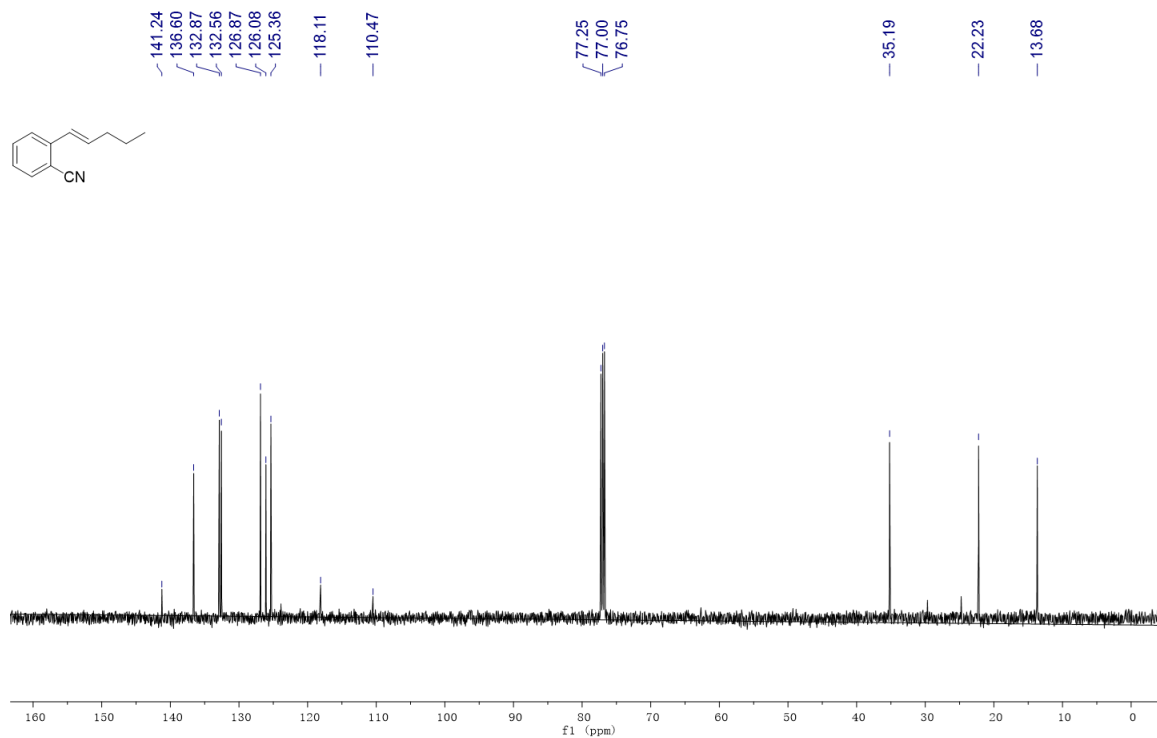

1215

1216

1217 <sup>1</sup>H and <sup>13</sup>C-NMR spectra of product 5d.

1218

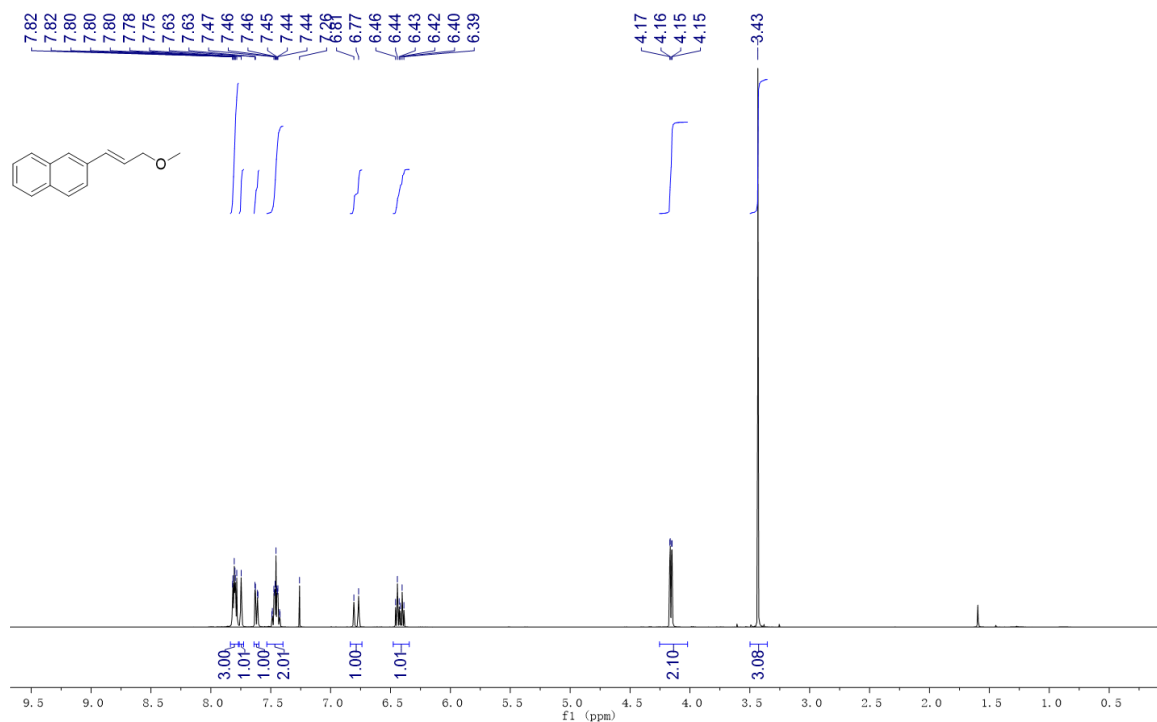

1219

1220

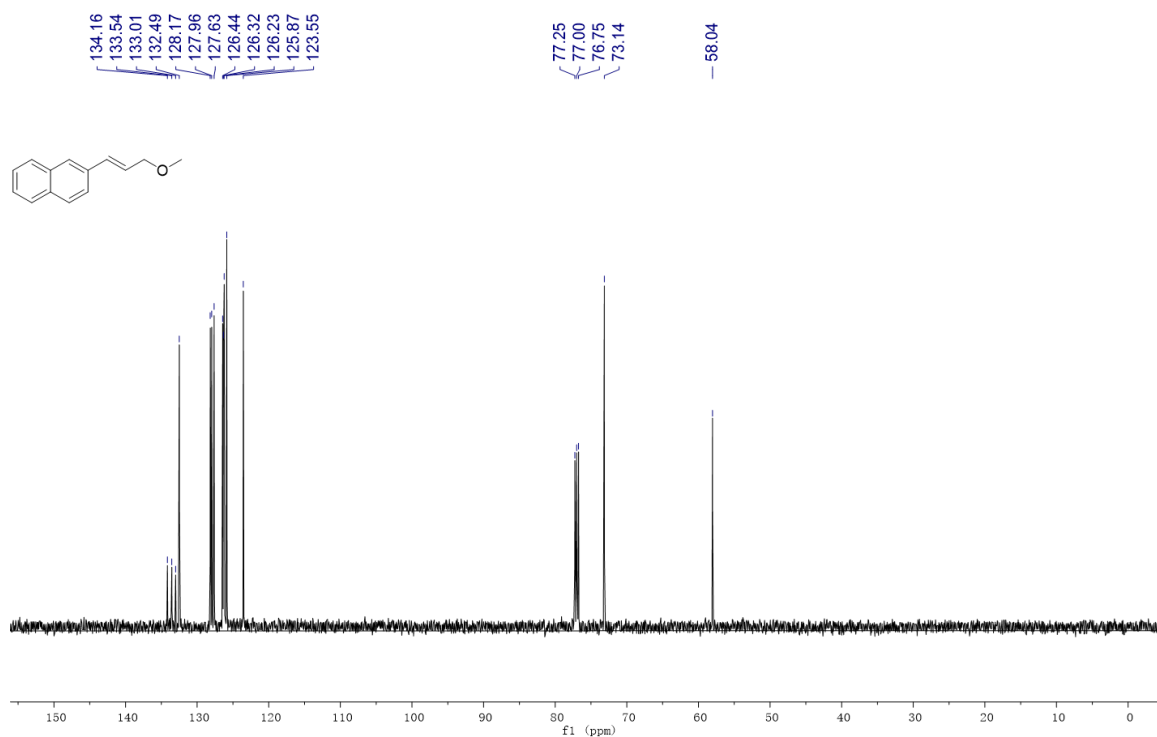

1221



1222 <sup>1</sup>H and <sup>13</sup>C-NMR spectra of product 5e.

1223

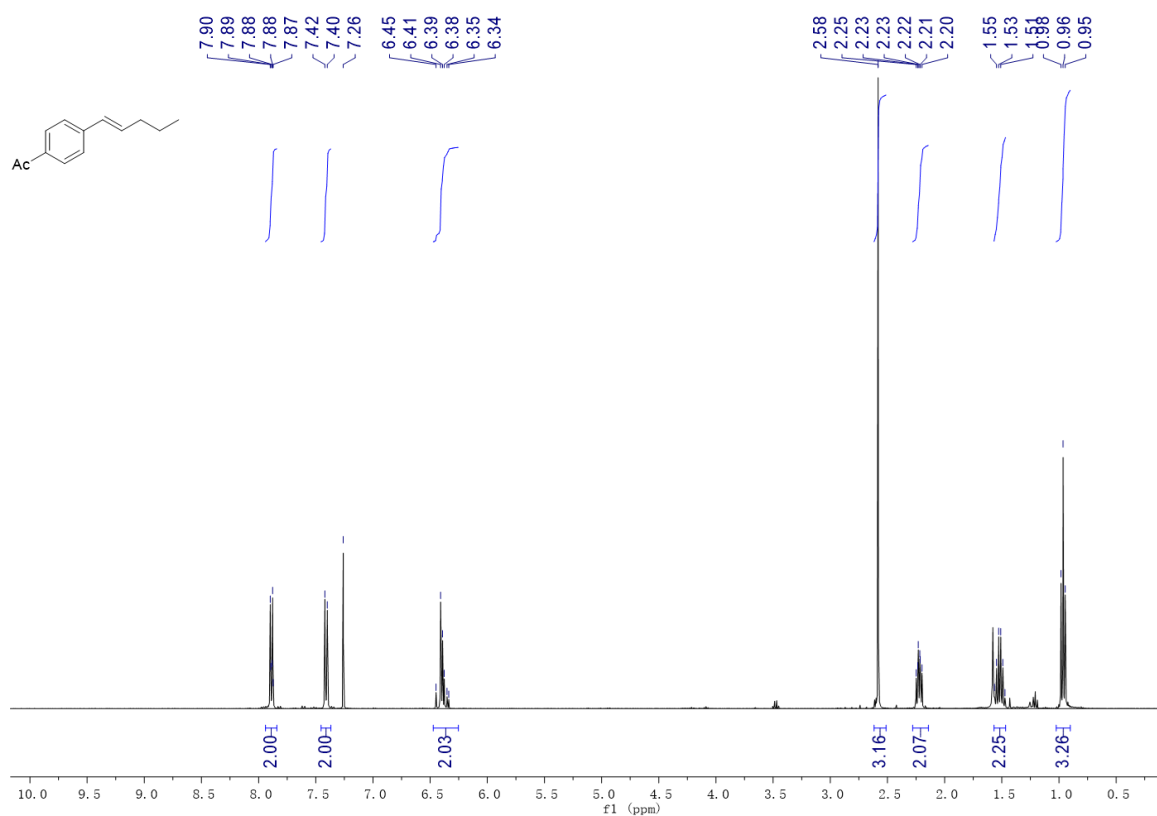

1224

1225

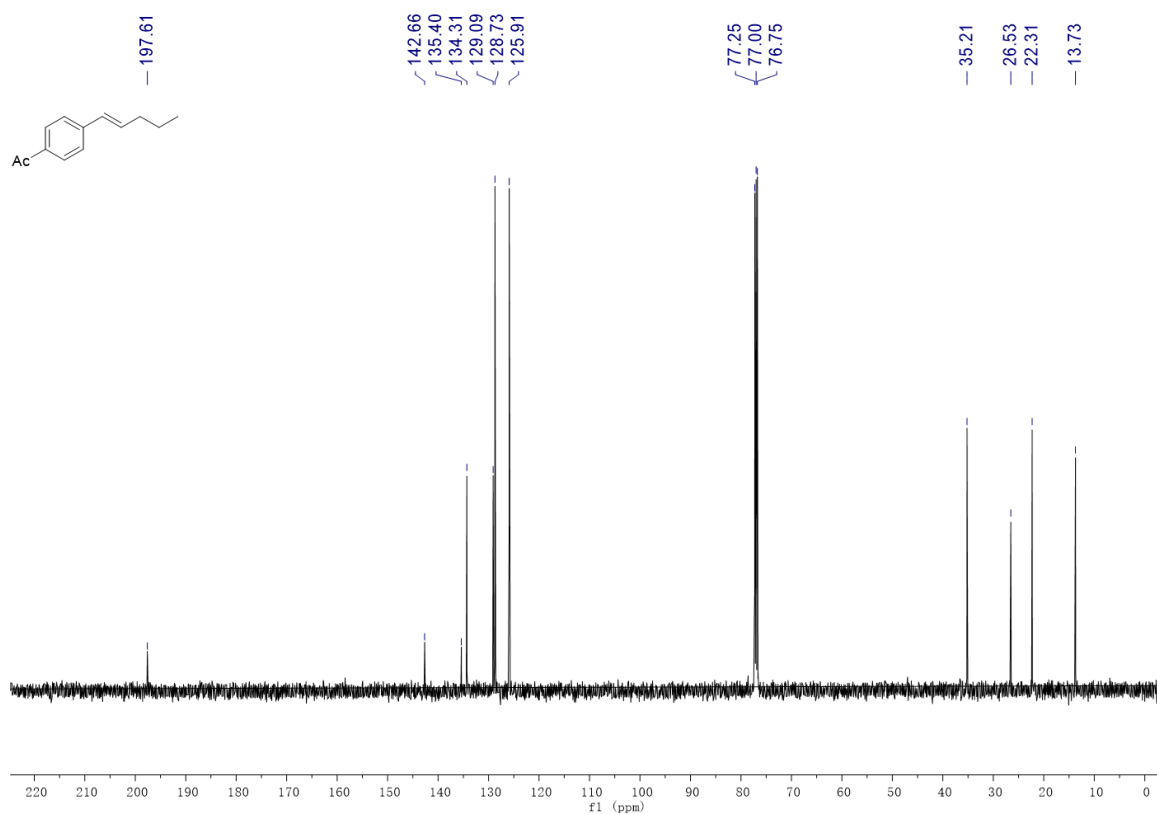

1226

1227 **<sup>1</sup>H and <sup>13</sup>C-NMR spectra of product 5f.**

1228

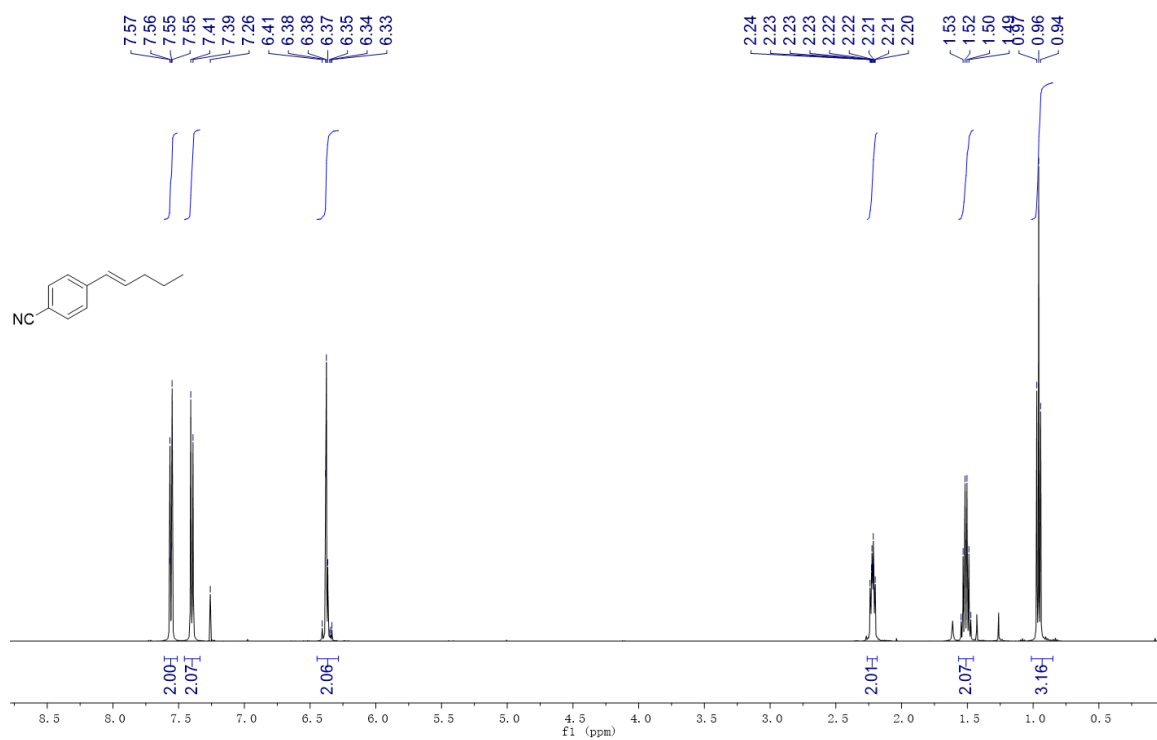

1229

1230

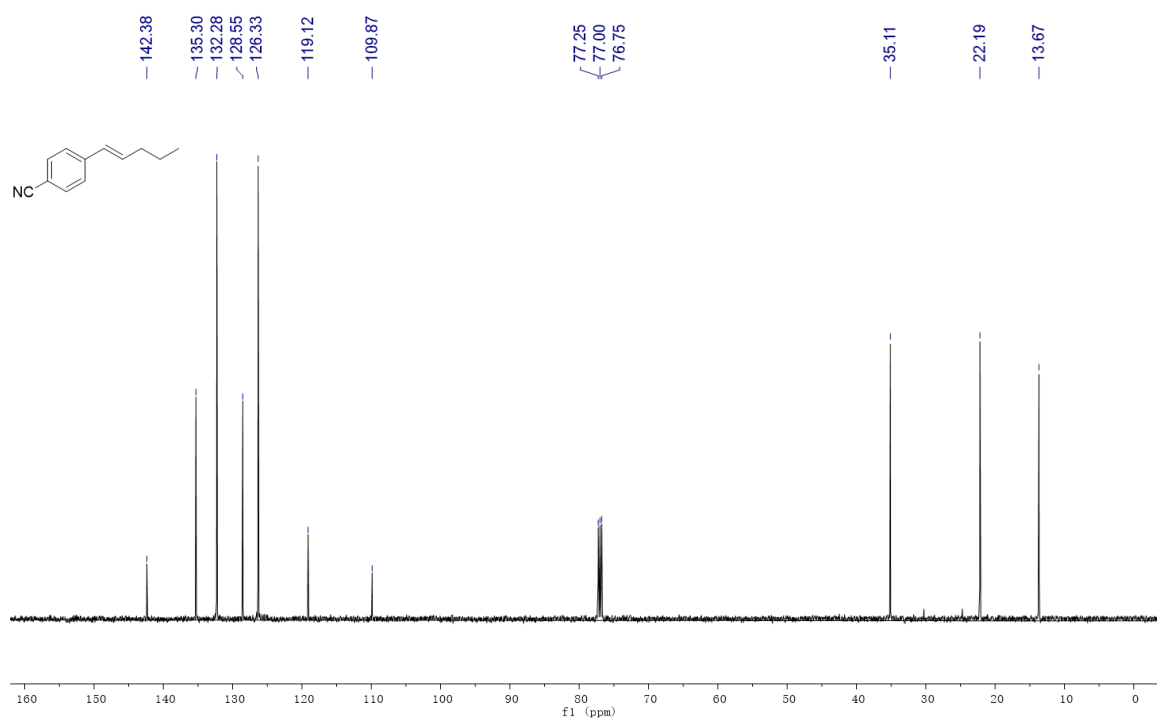

1231

1232

1233 <sup>1</sup>H and <sup>13</sup>C-NMR spectra of product 5g.

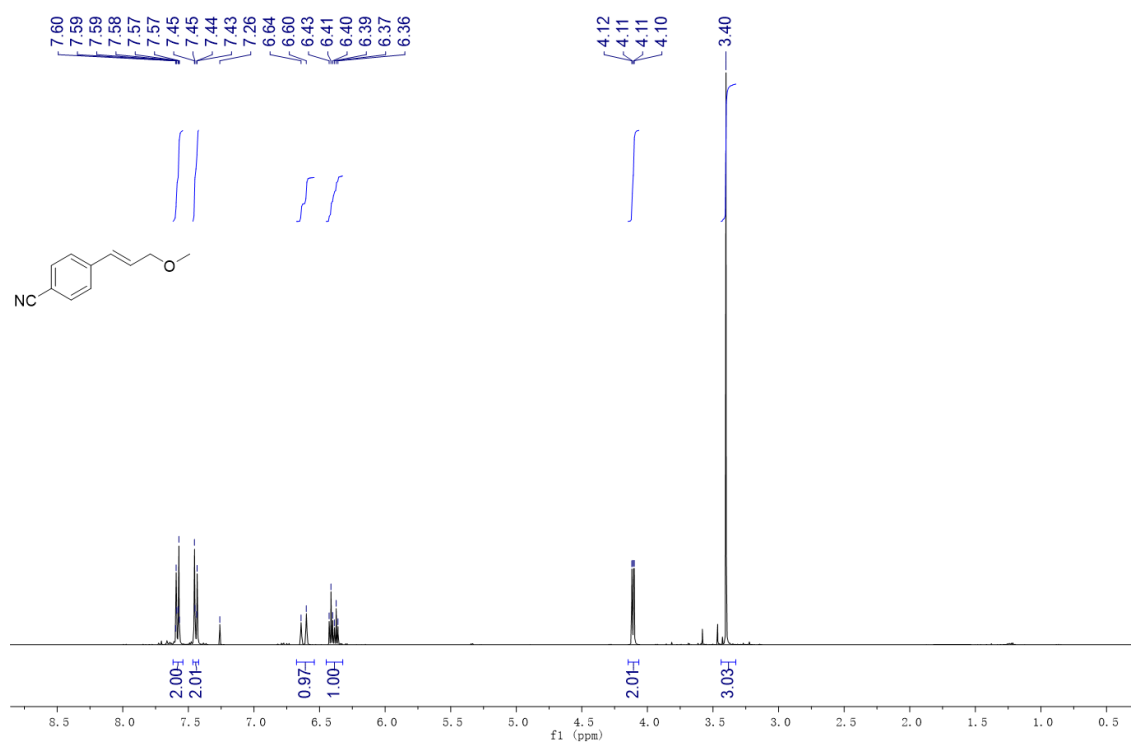

1234

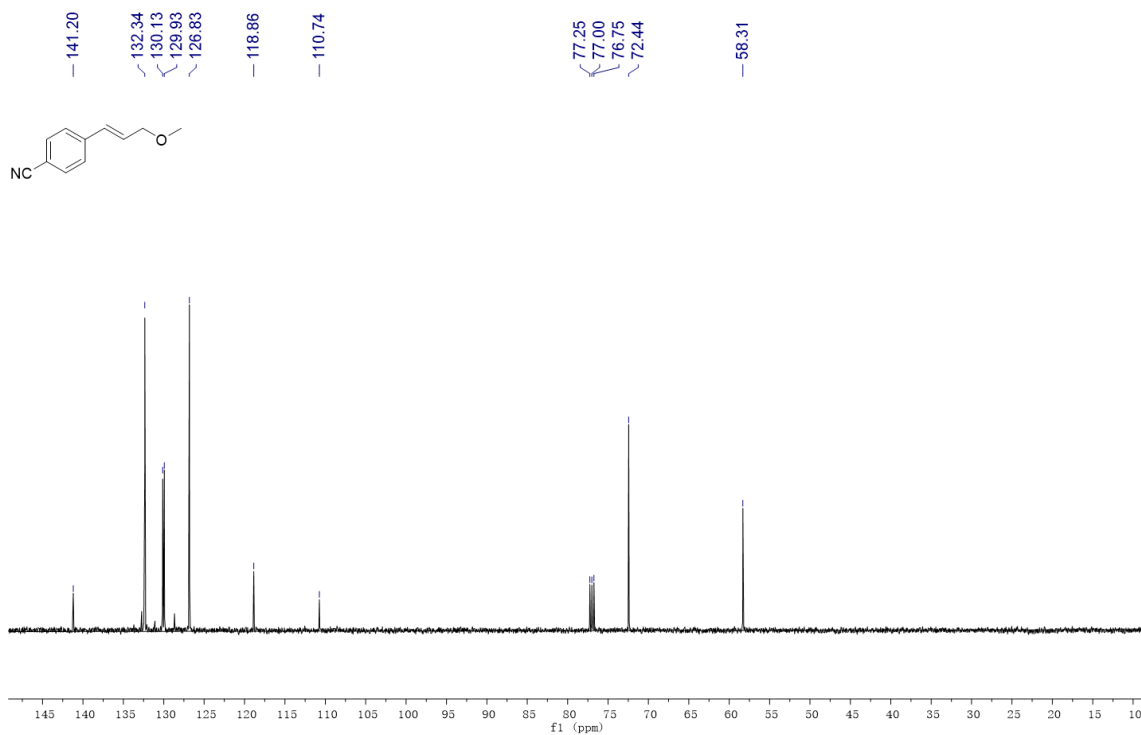

1235

1236

1237 <sup>1</sup>H and <sup>13</sup>C-NMR spectra of product 5h.

1238

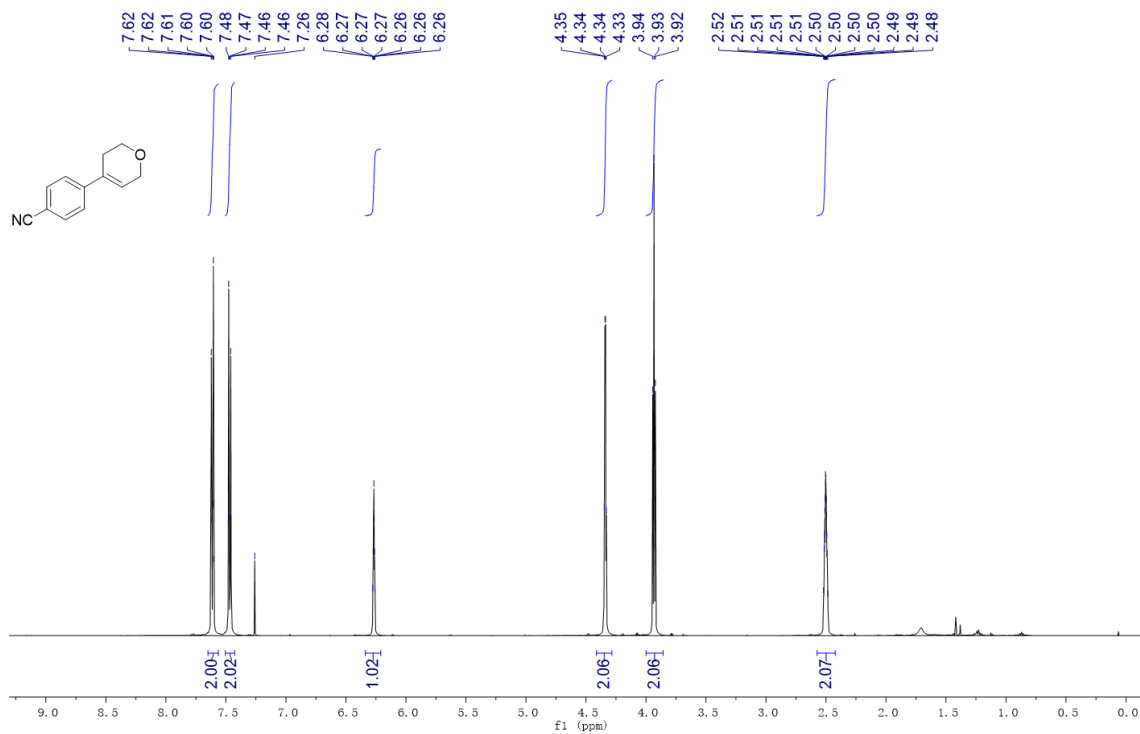

1239

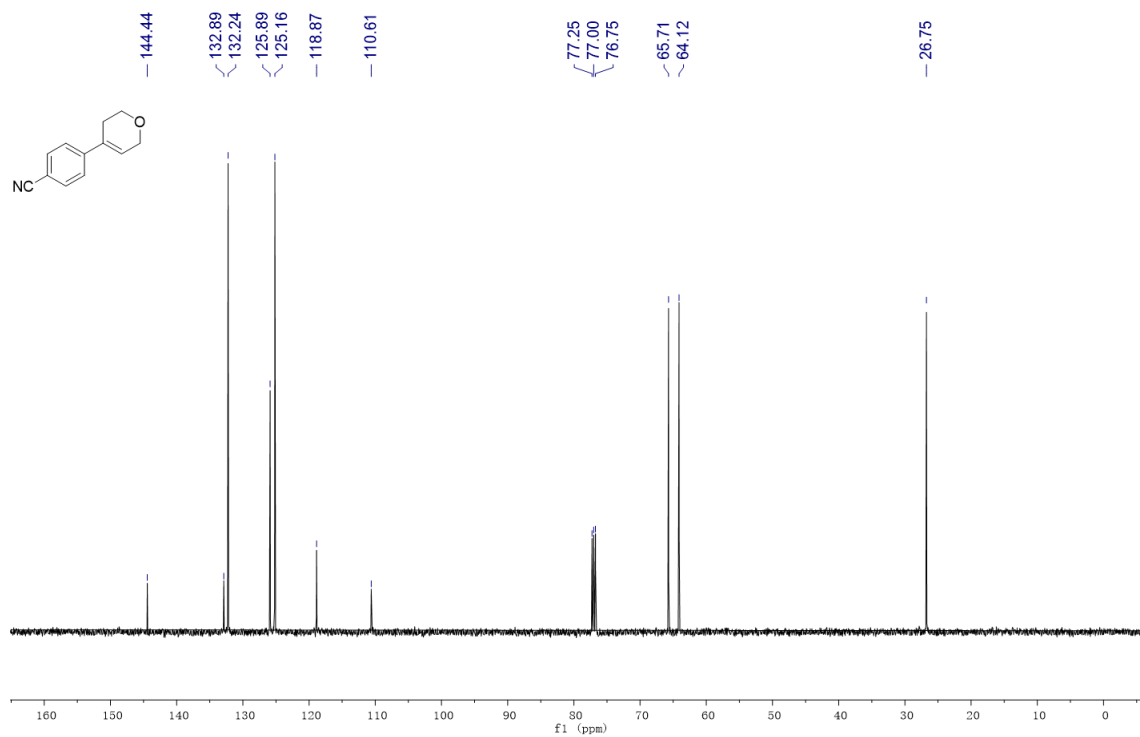

1240

1241

1242 <sup>1</sup>H and <sup>13</sup>C-NMR spectra of product 5i.

1243

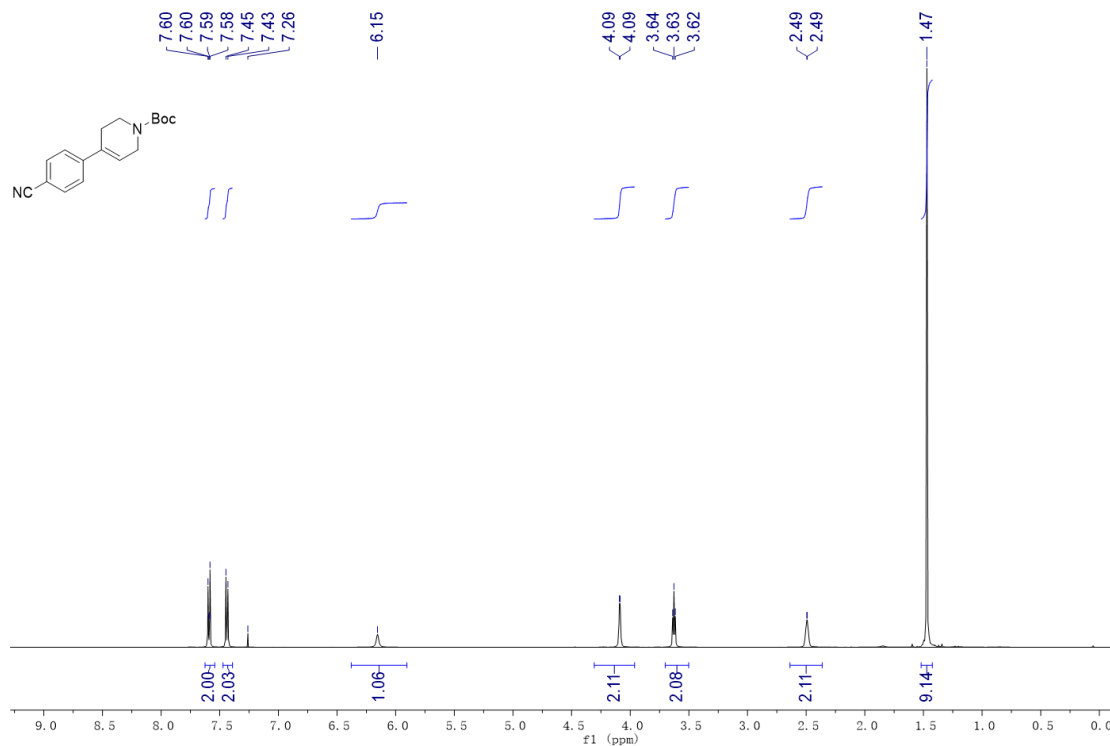

1244

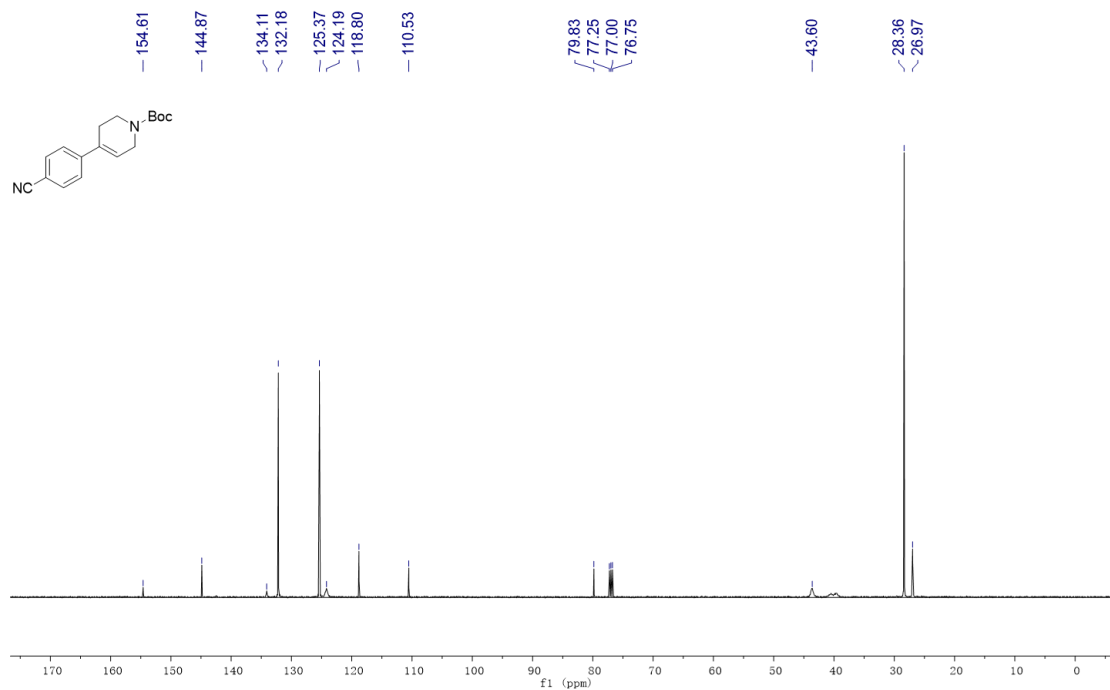

1245

1246

1247 <sup>1</sup>H and <sup>13</sup>C-NMR spectra of product 5j.

1248

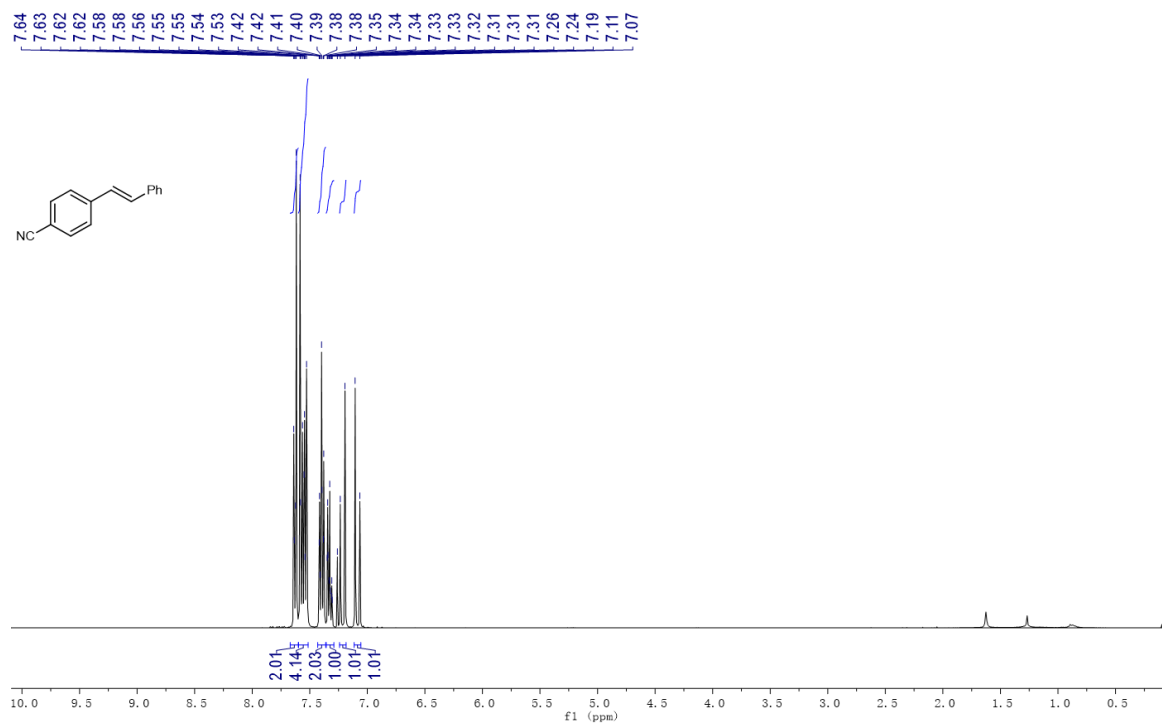

1249

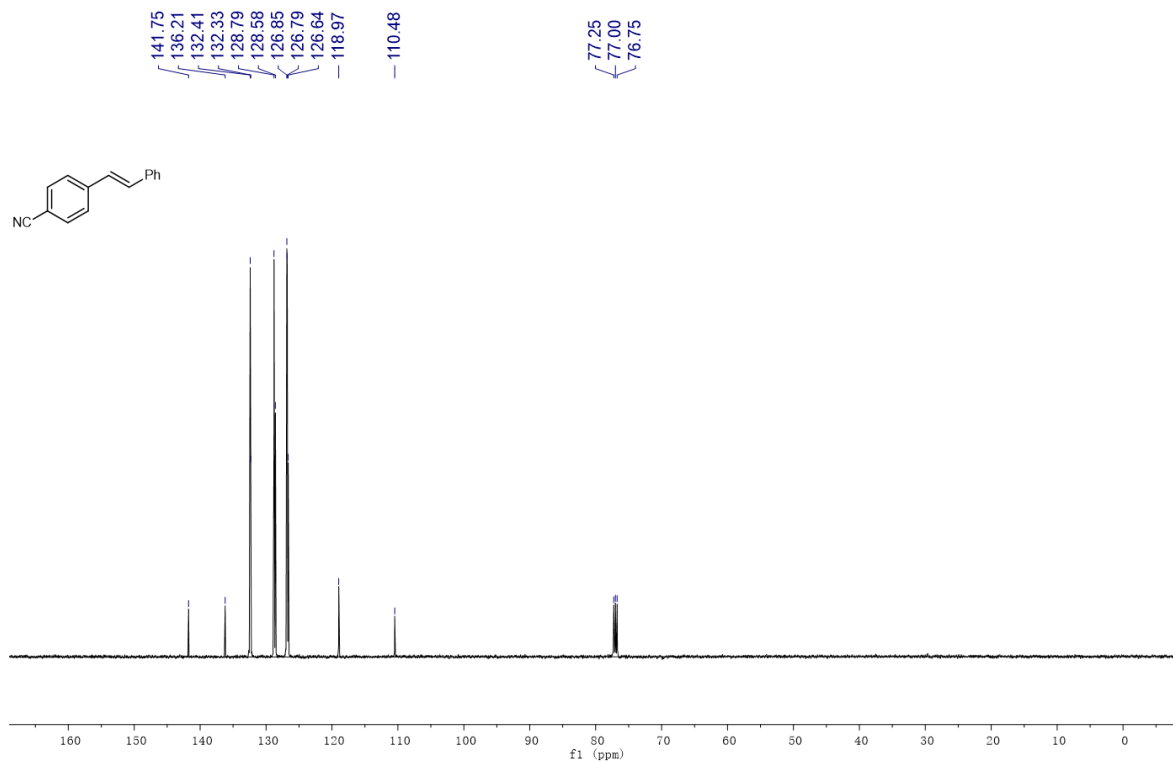

1250

1251

1252 <sup>1</sup>H and <sup>13</sup>C-NMR spectra of product 5k.

1253

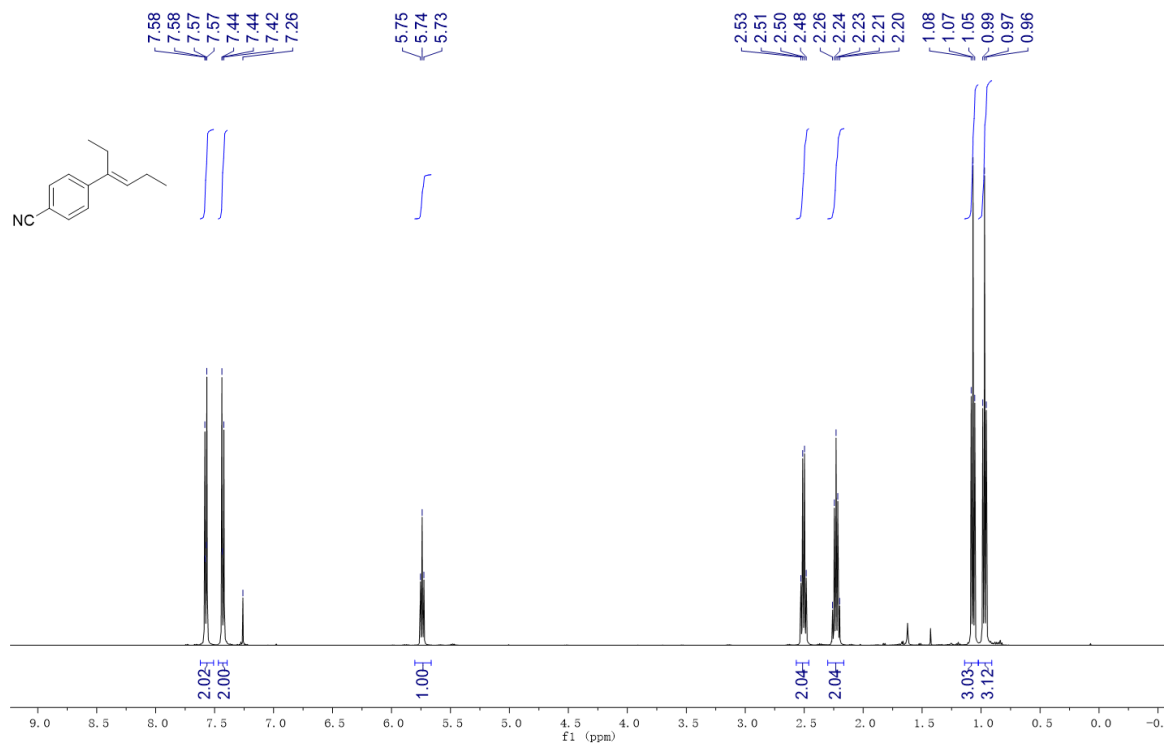

1254

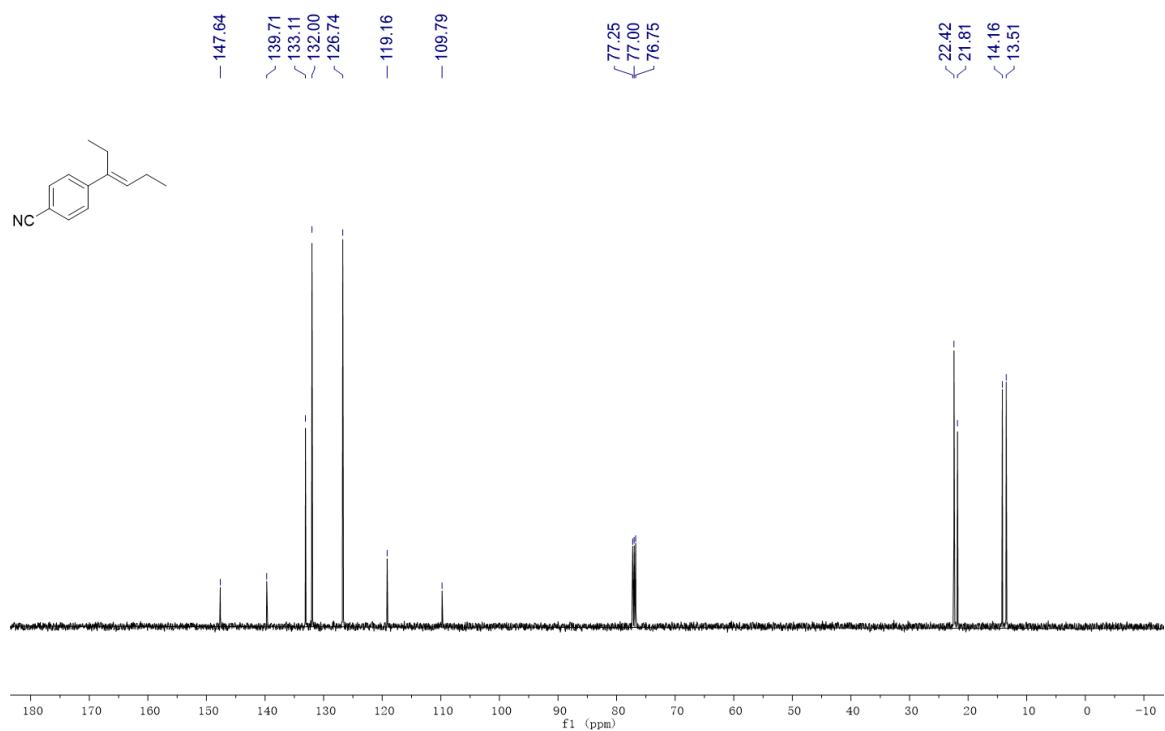

1255

1256

1257 <sup>1</sup>H and <sup>13</sup>C-NMR spectra of product 5l.

1258

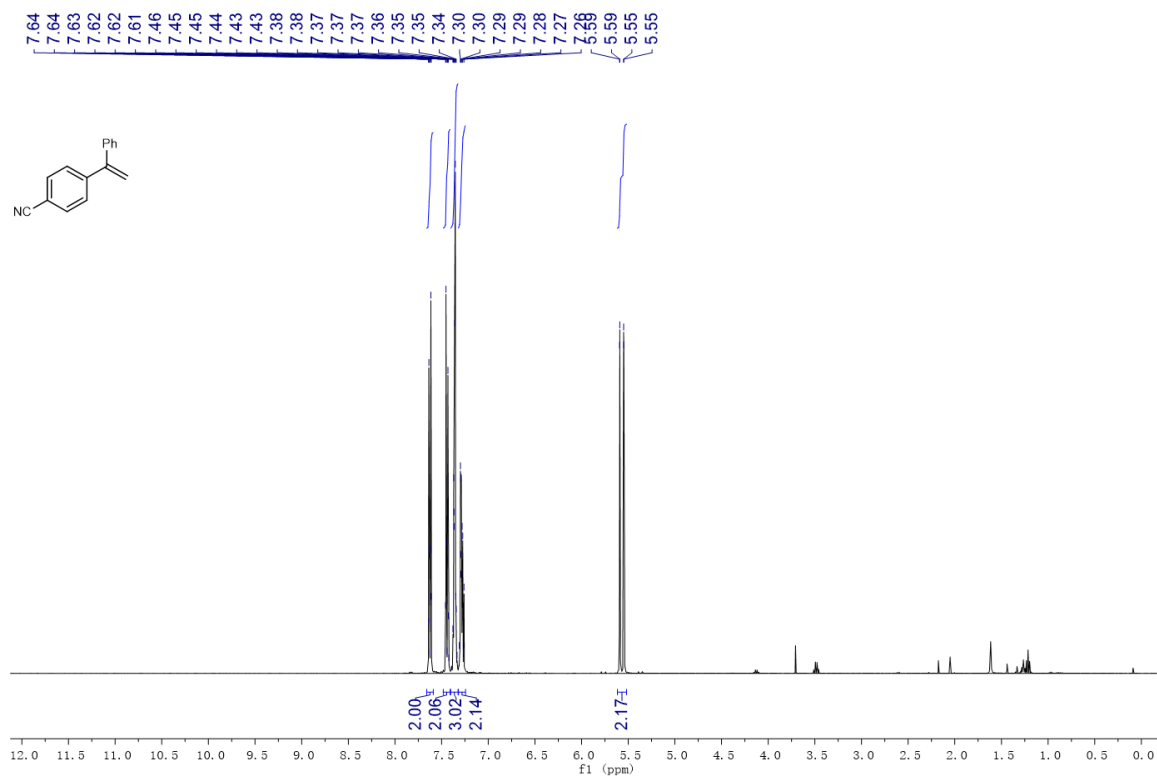

1259

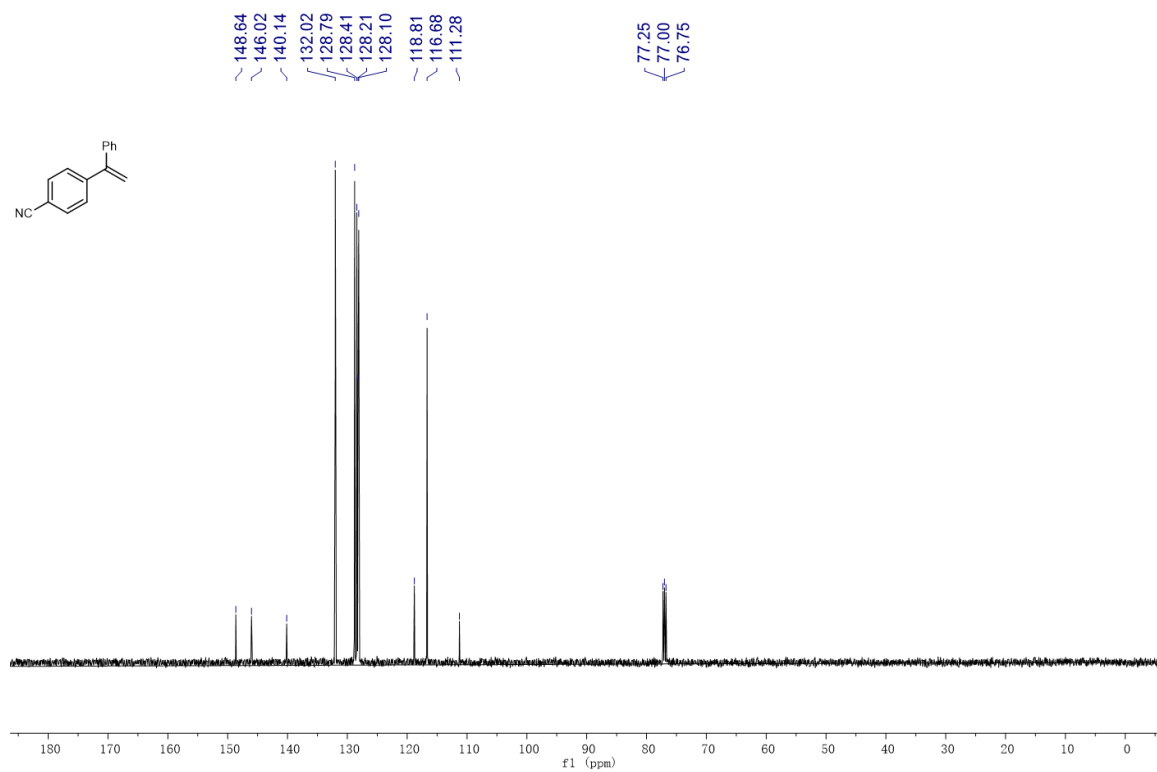

1260

1261



1262 <sup>1</sup>H, <sup>13</sup>C-NMR spectra of product 4ae.

1263

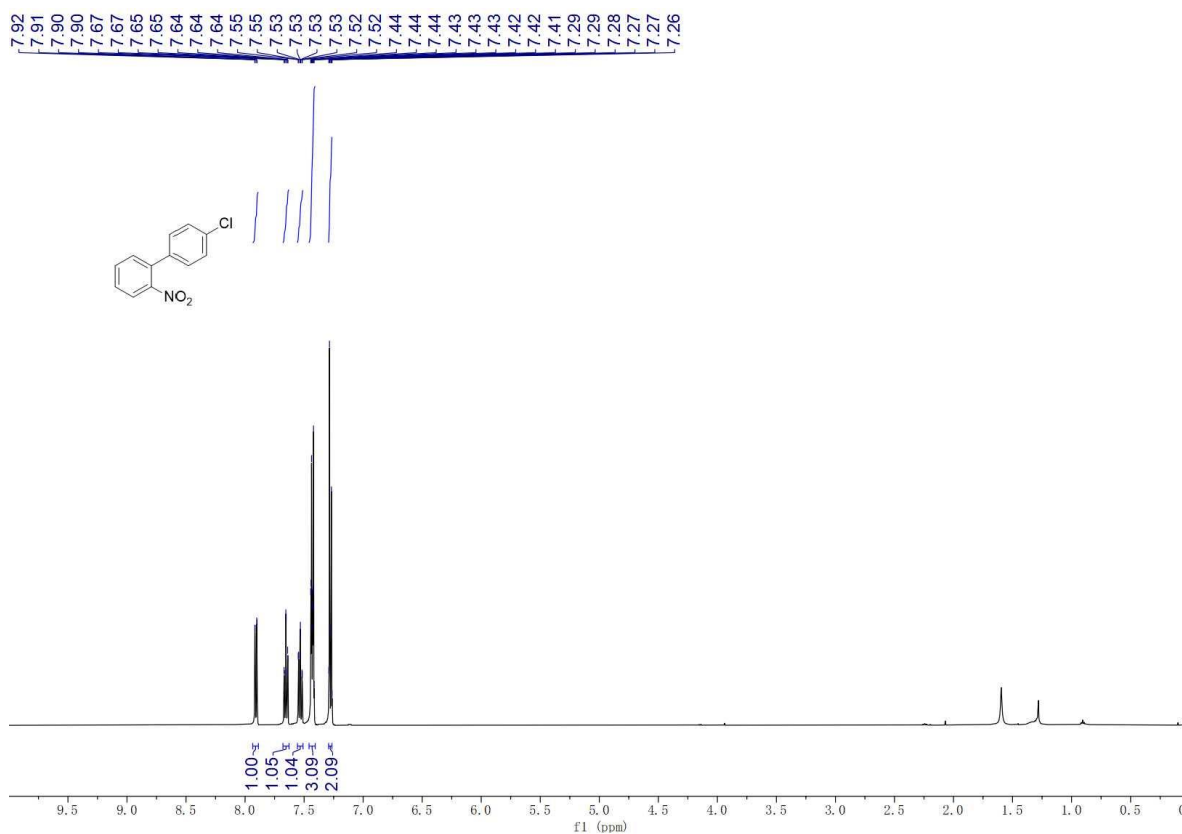

1264

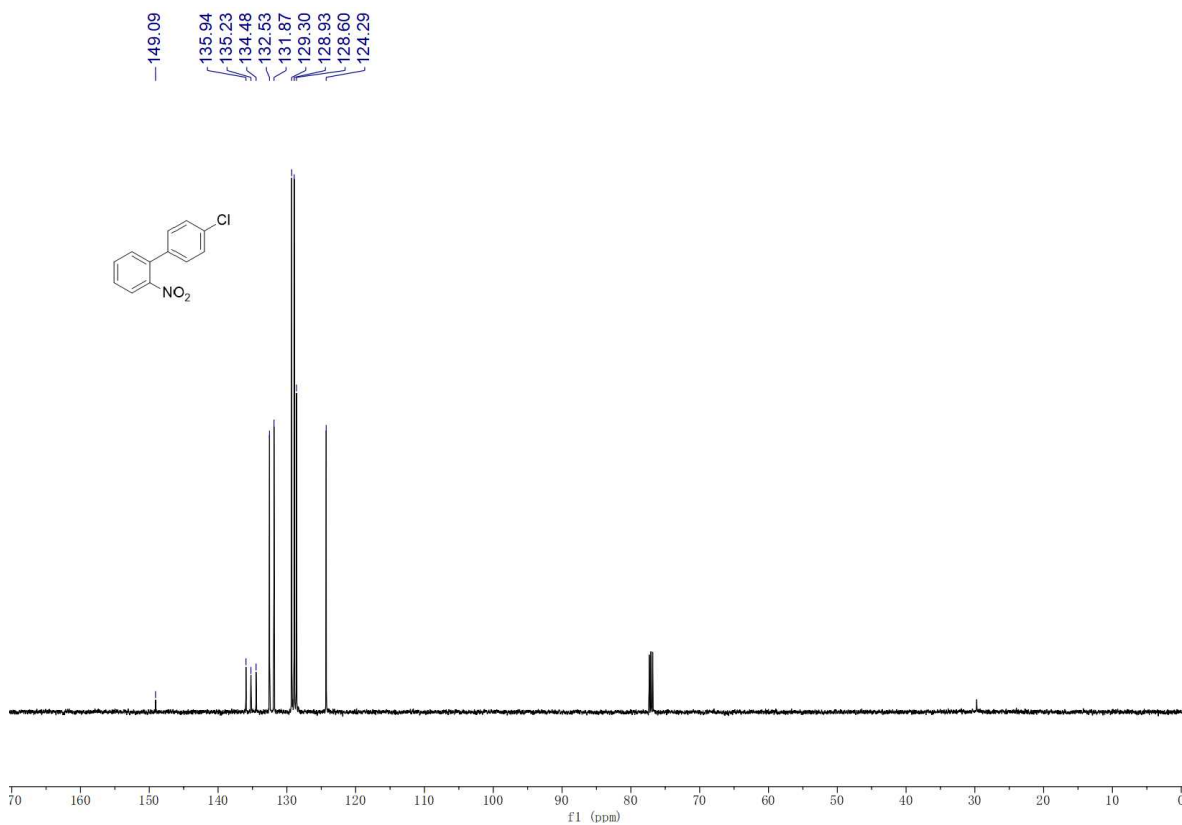

1265

1266 <sup>1</sup>H, <sup>13</sup>C and <sup>19</sup>F NMR of product 4af.

1267

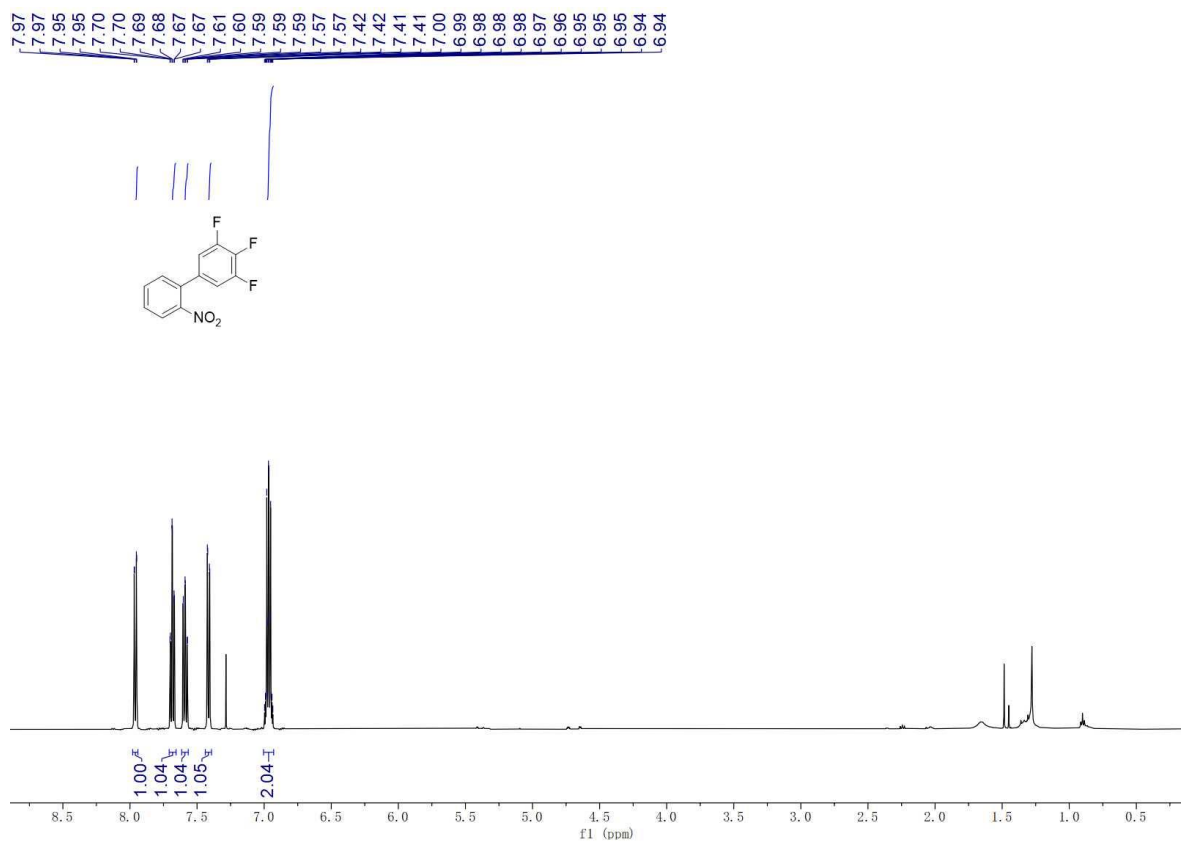

1268

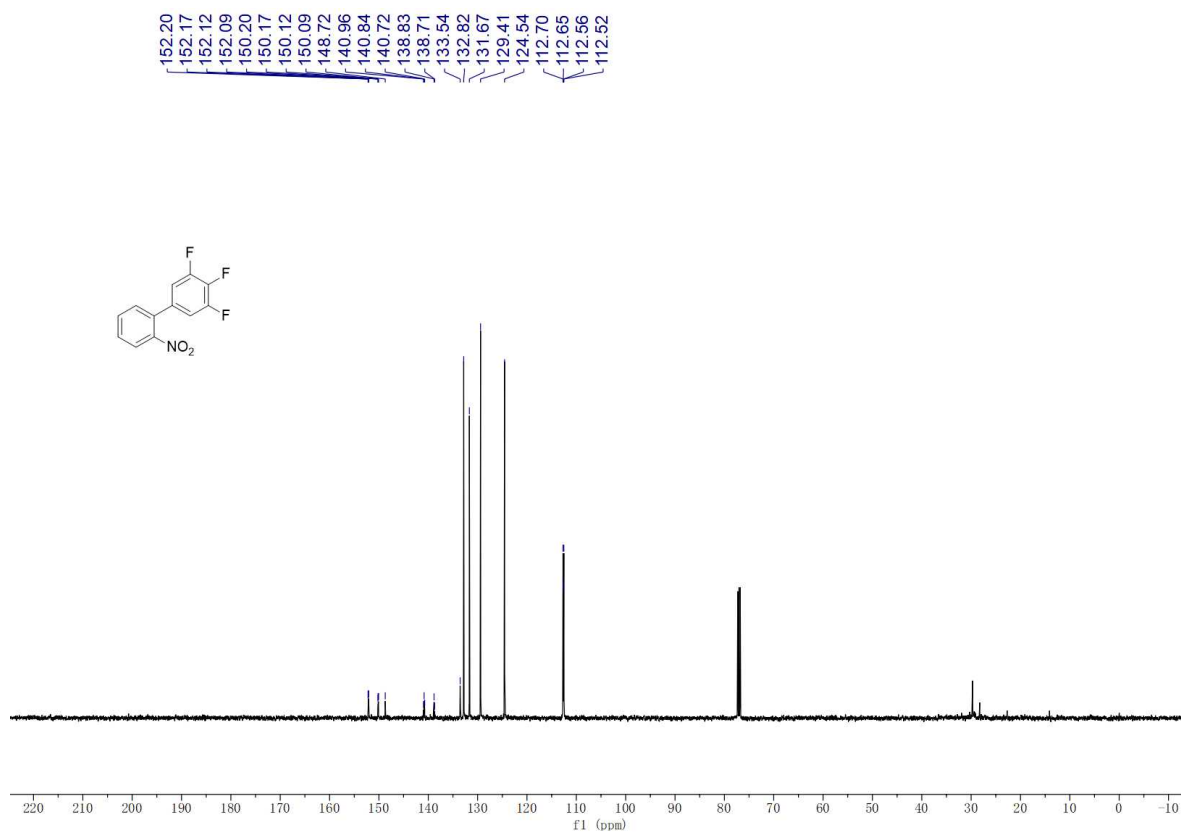

1269

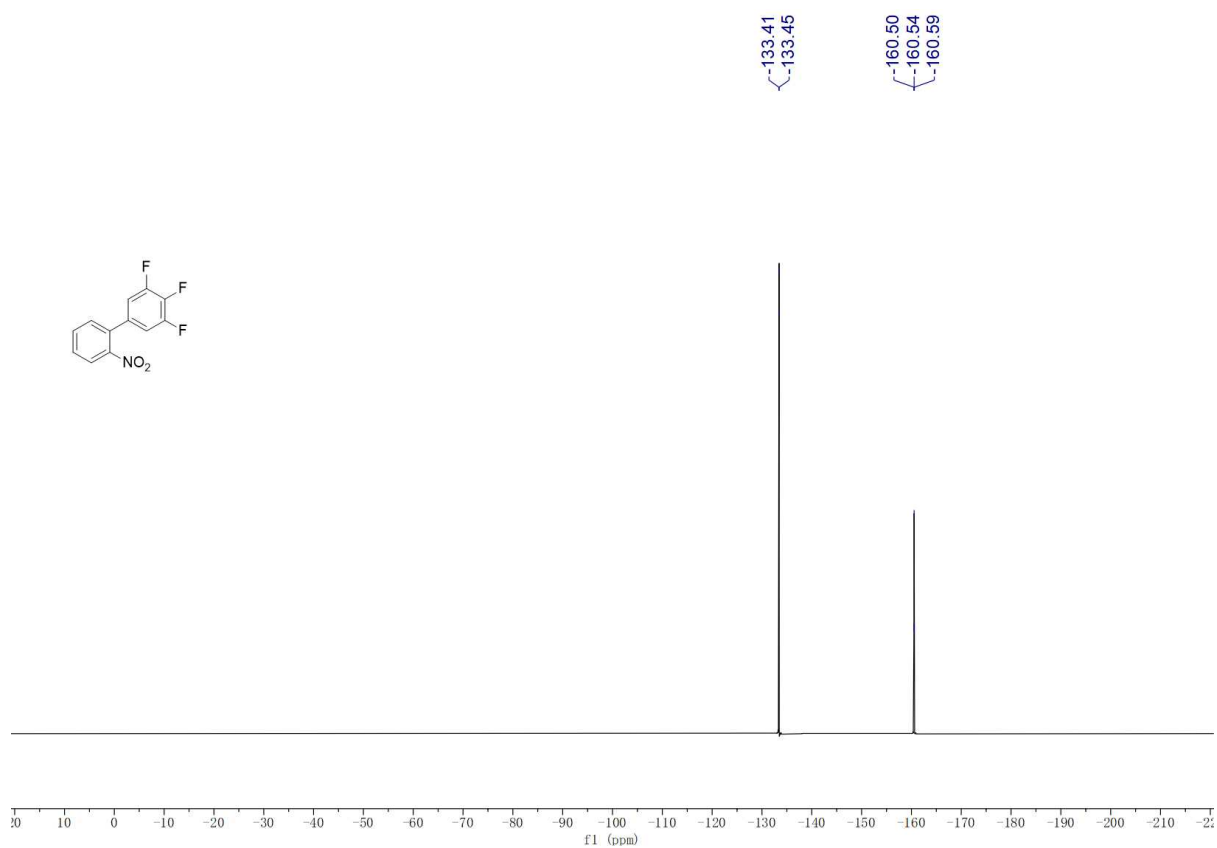

1270

1271

1272 <sup>1</sup>H and <sup>13</sup>C spectra of product 4ag.

1273

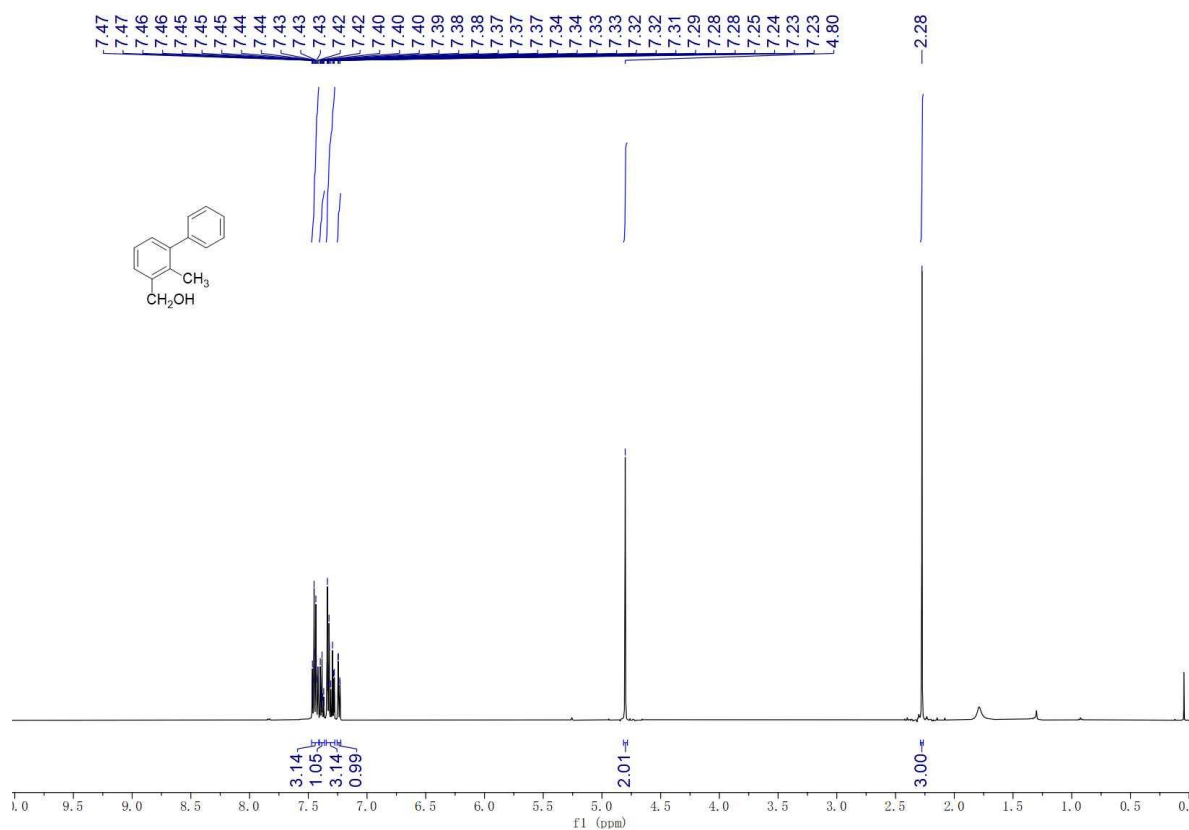

1274

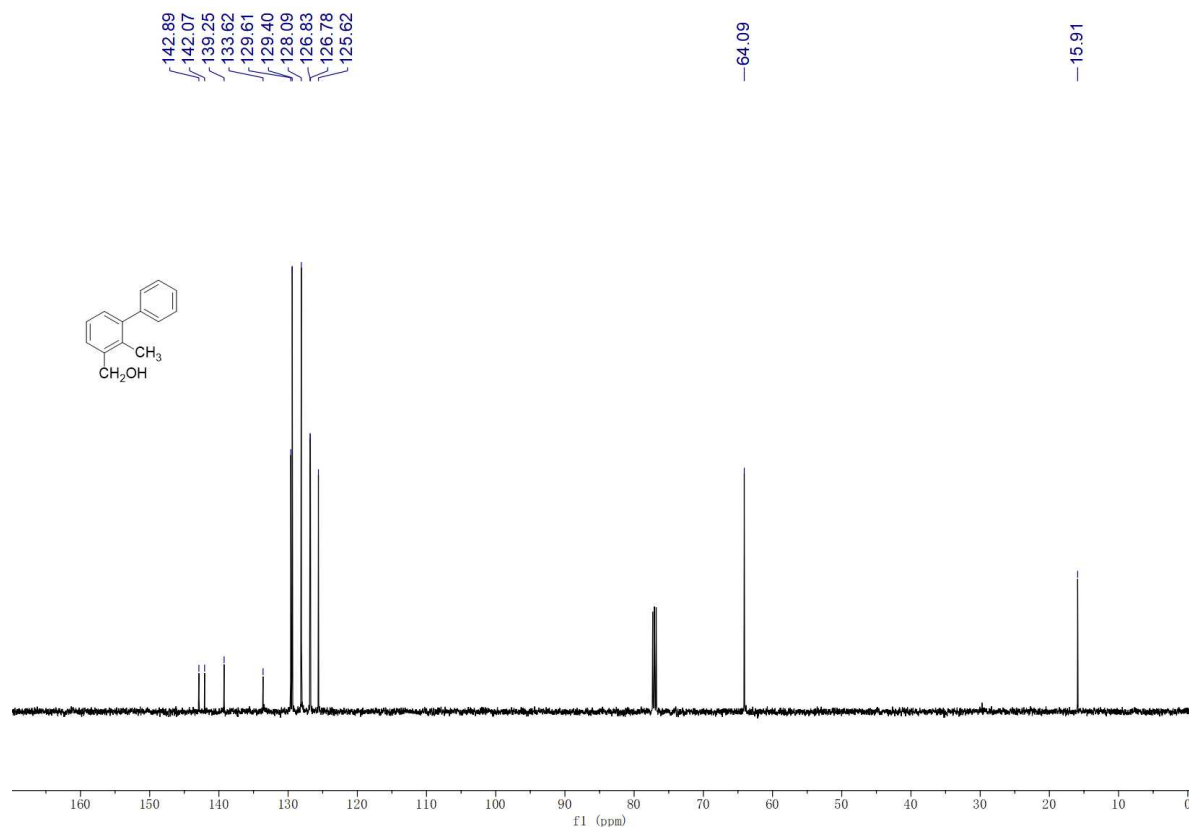

1275

1276  $^1\text{H}$ ,  $^{13}\text{C}$  and  $^{19}\text{F}$  NMR spectra of product 4ah.

1277

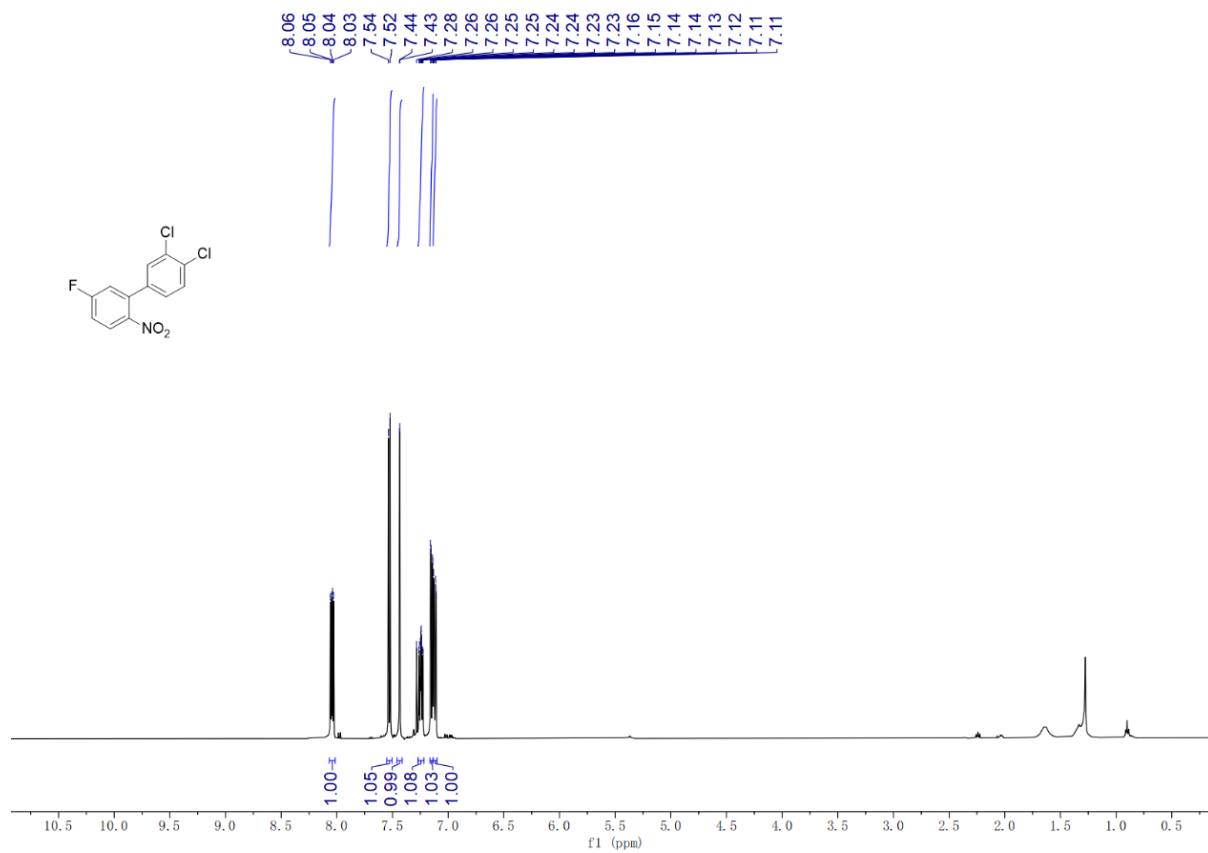

1278

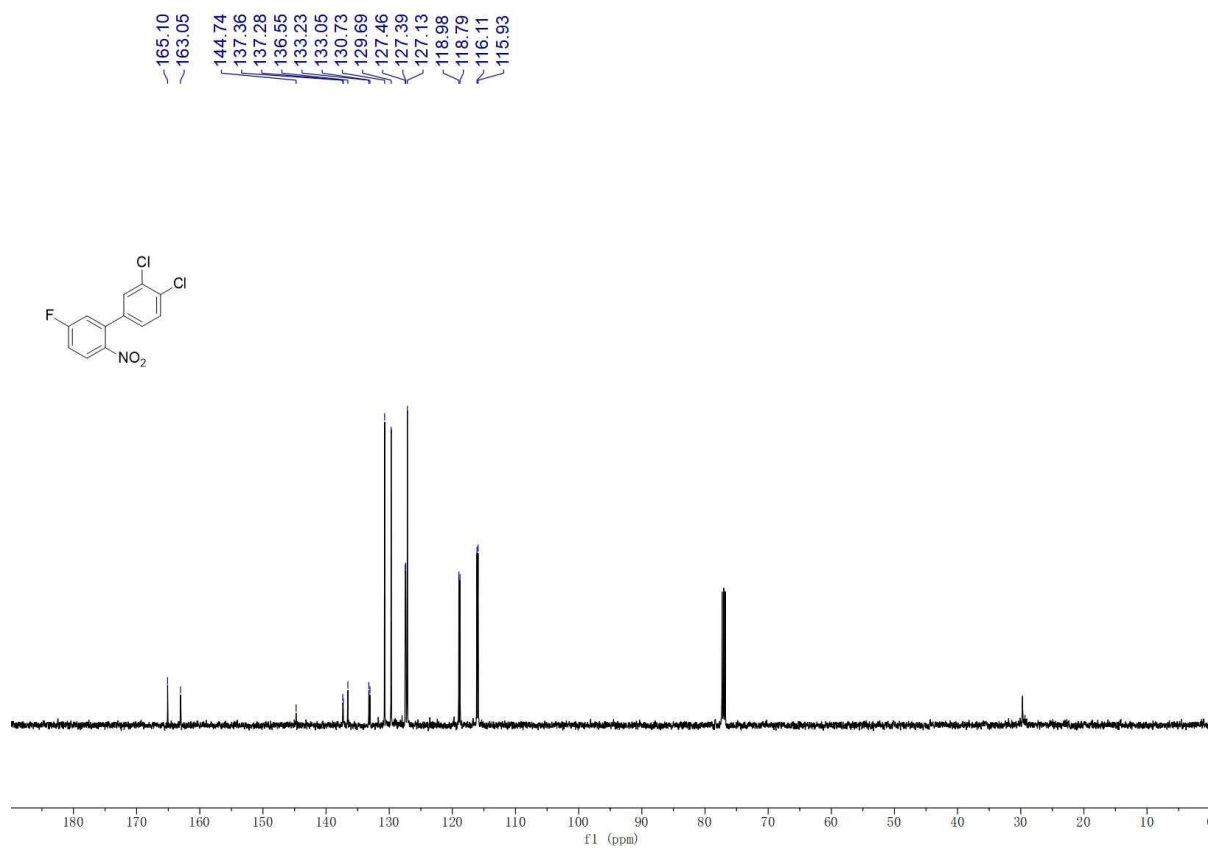

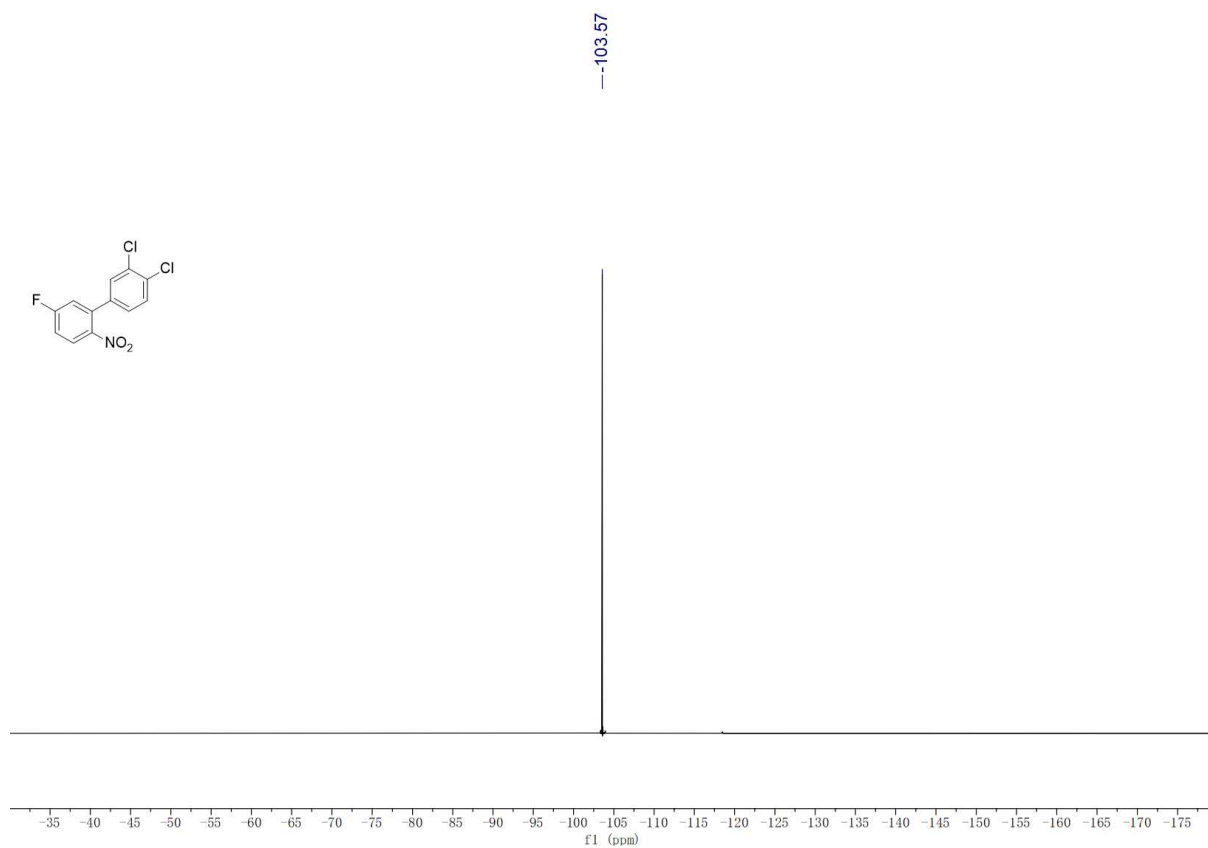

1279

1280

1281  $^1\text{H}$ ,  $^{13}\text{C}$  and  $^{19}\text{F}$  NMR spectra of product 4ai.

1282

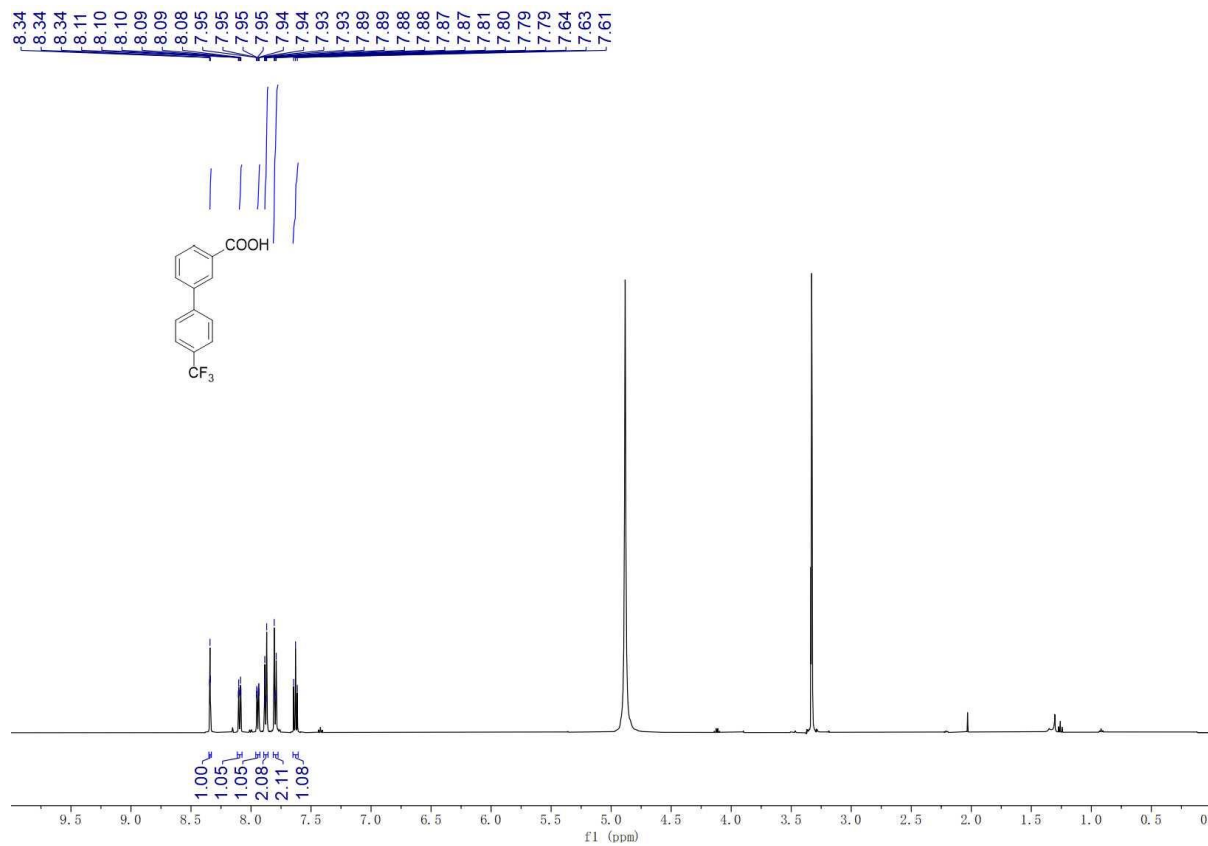

1283

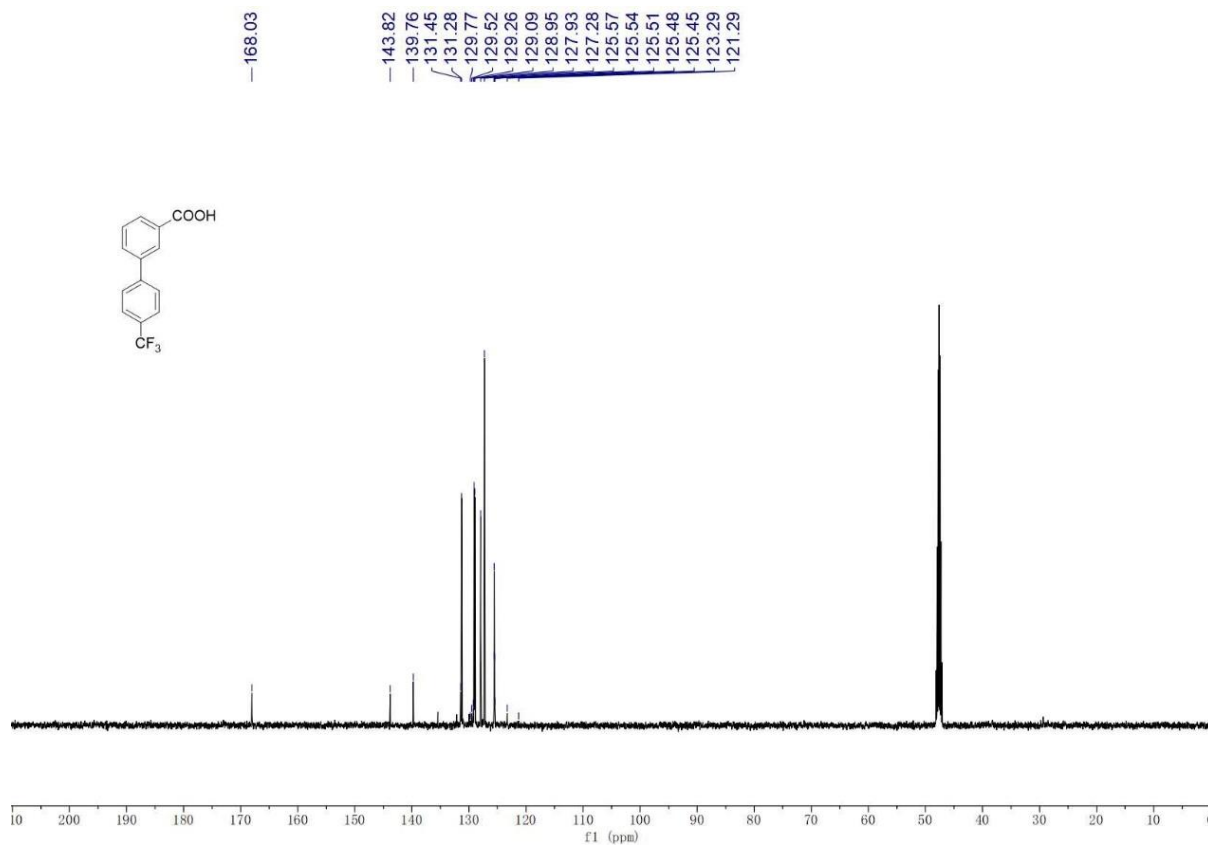

1284

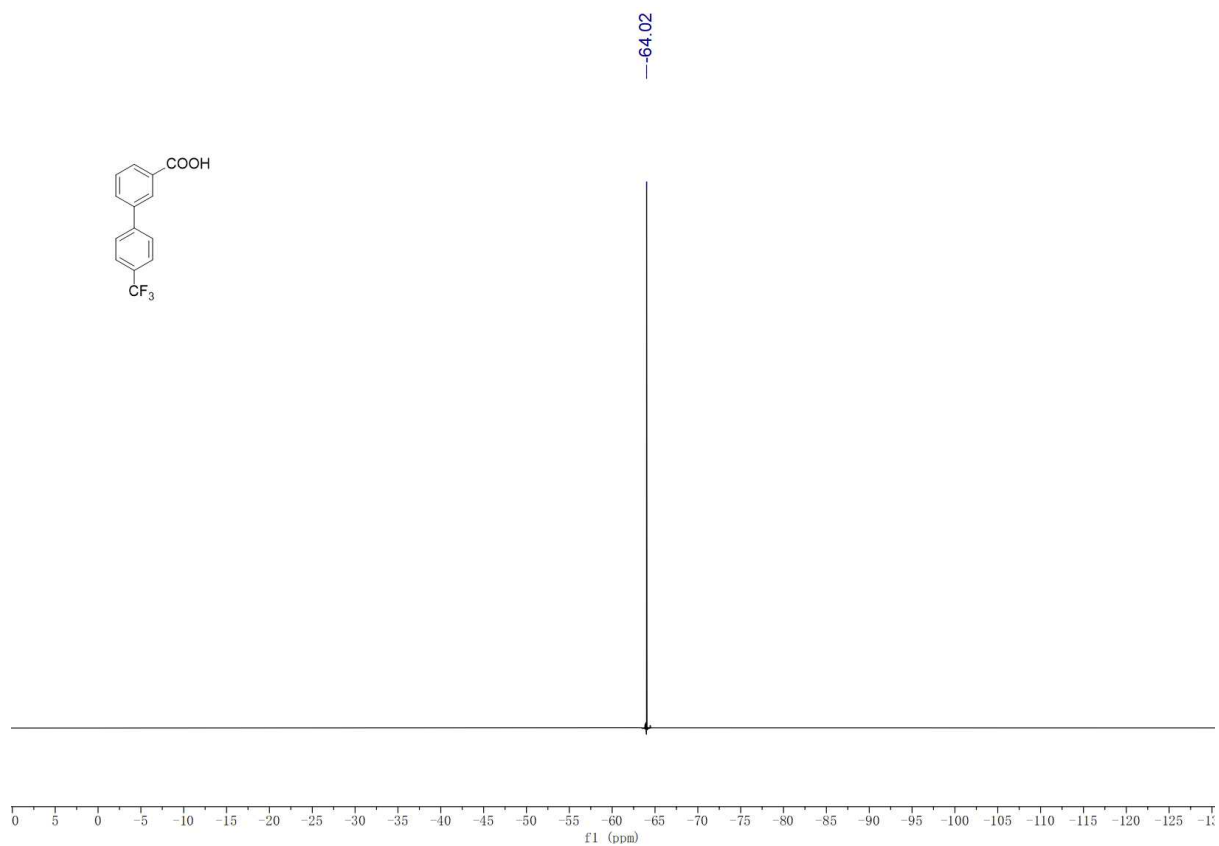

1285

1286



1287  $^1\text{H}$ ,  $^{13}\text{C}$  and  $^{19}\text{F}$  NMR spectra of product 4aj.

1288

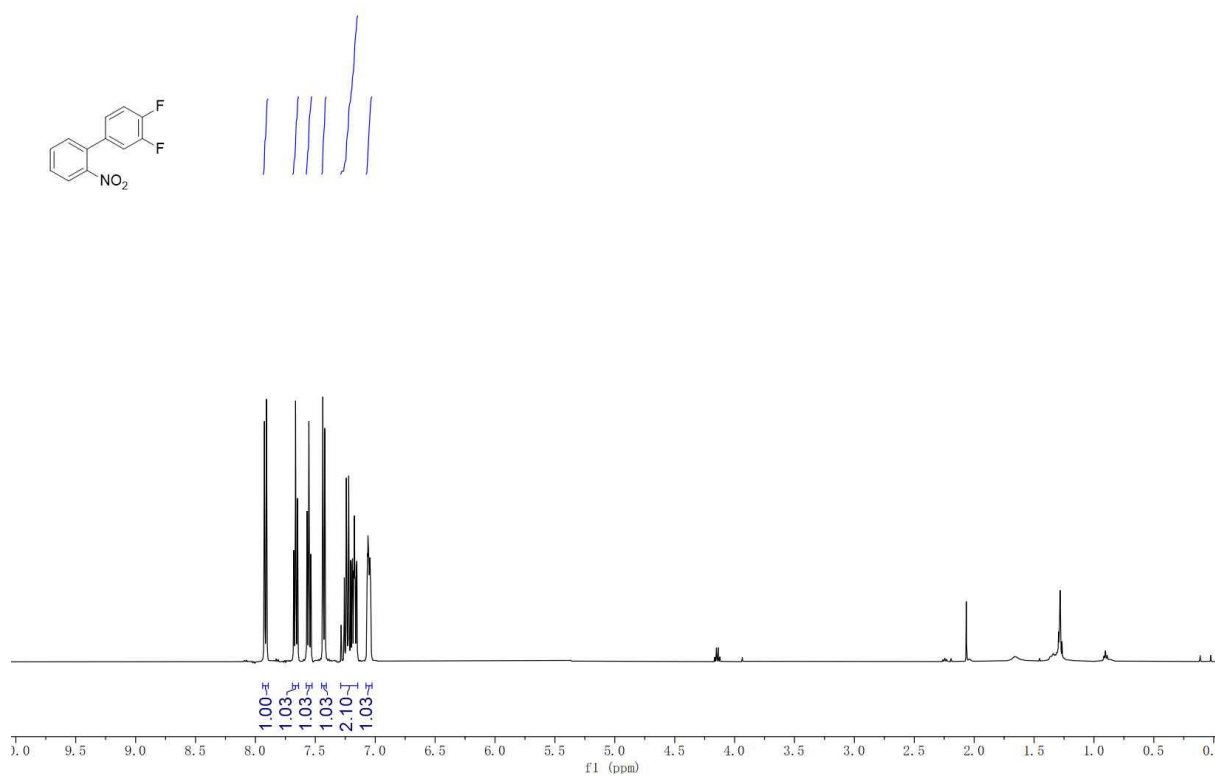

1289

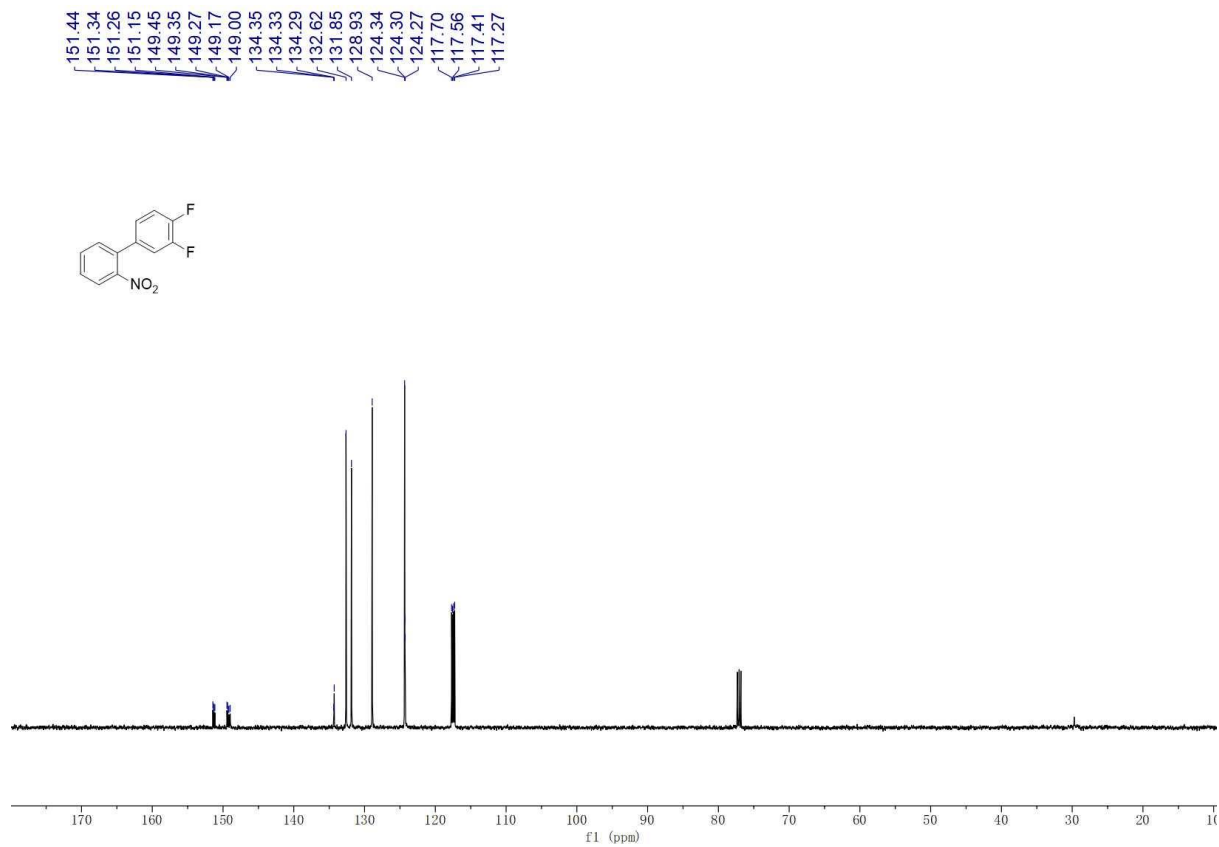

1290

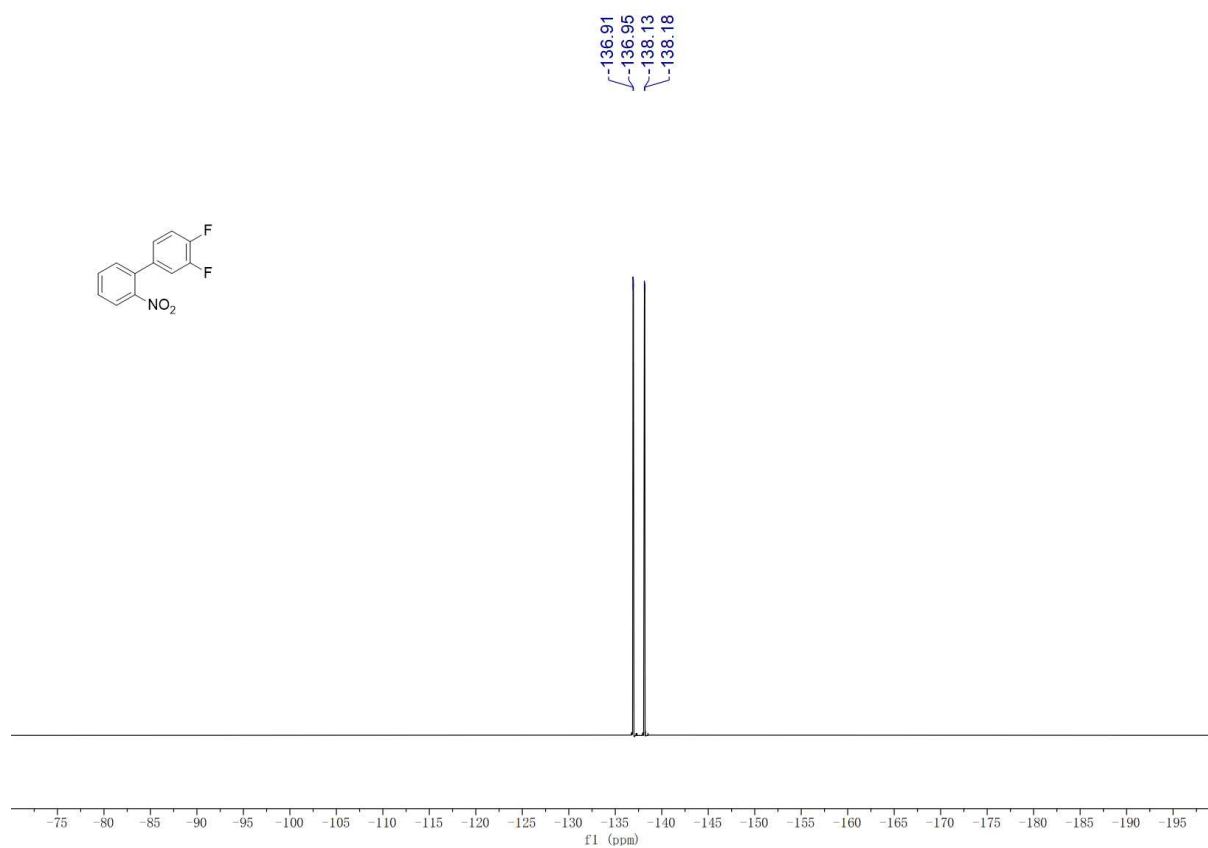

1291

1292

1293 <sup>1</sup>H and <sup>13</sup>C NMR spectra of product 4ak.

1294

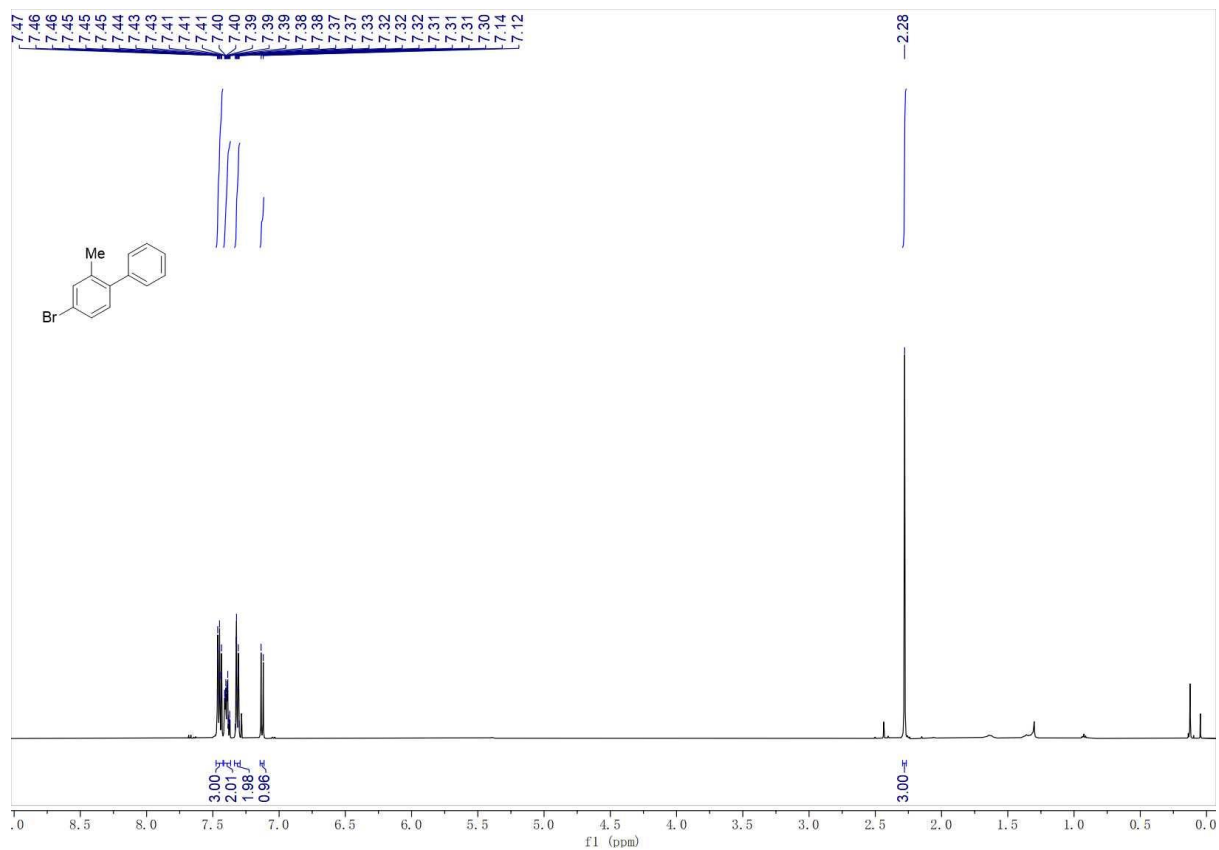

1295

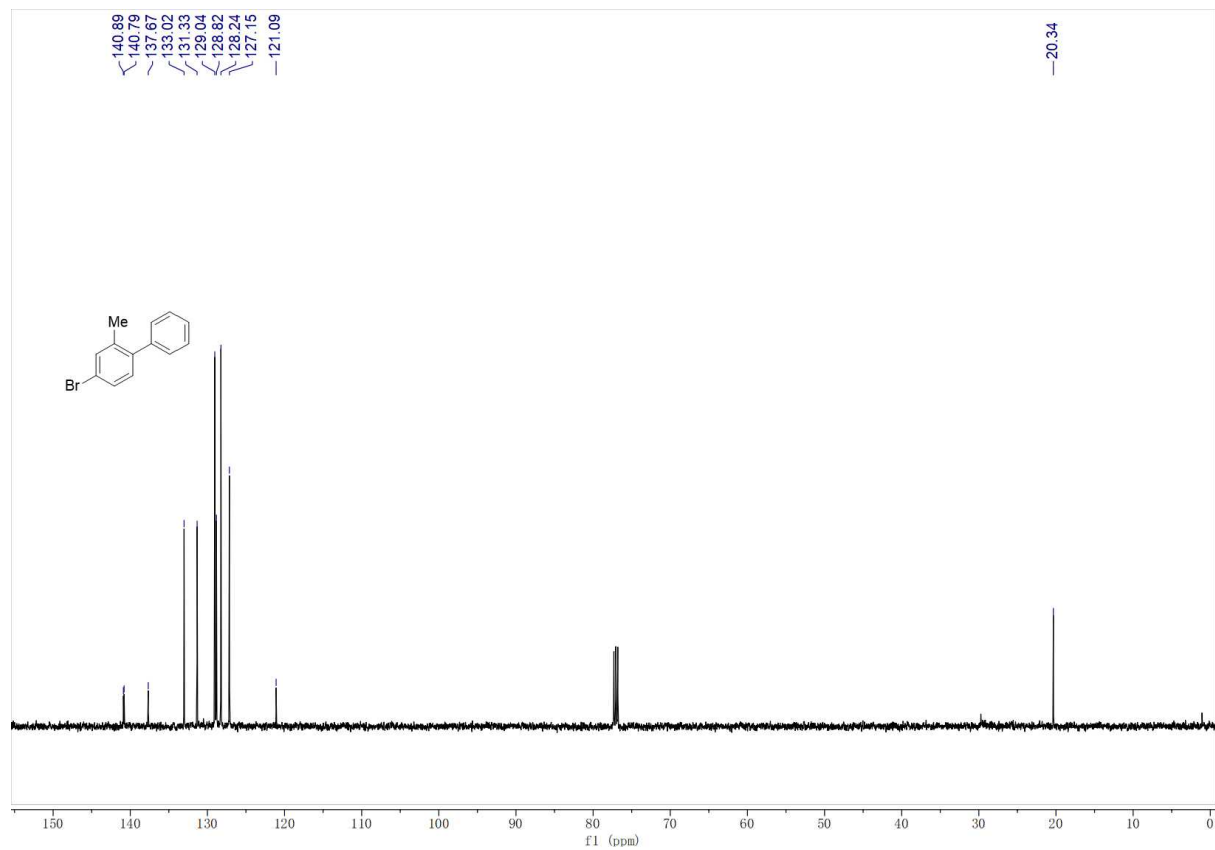

1296

1297 <sup>1</sup>H and <sup>13</sup>C- NMR spectra of product 4al.

1298

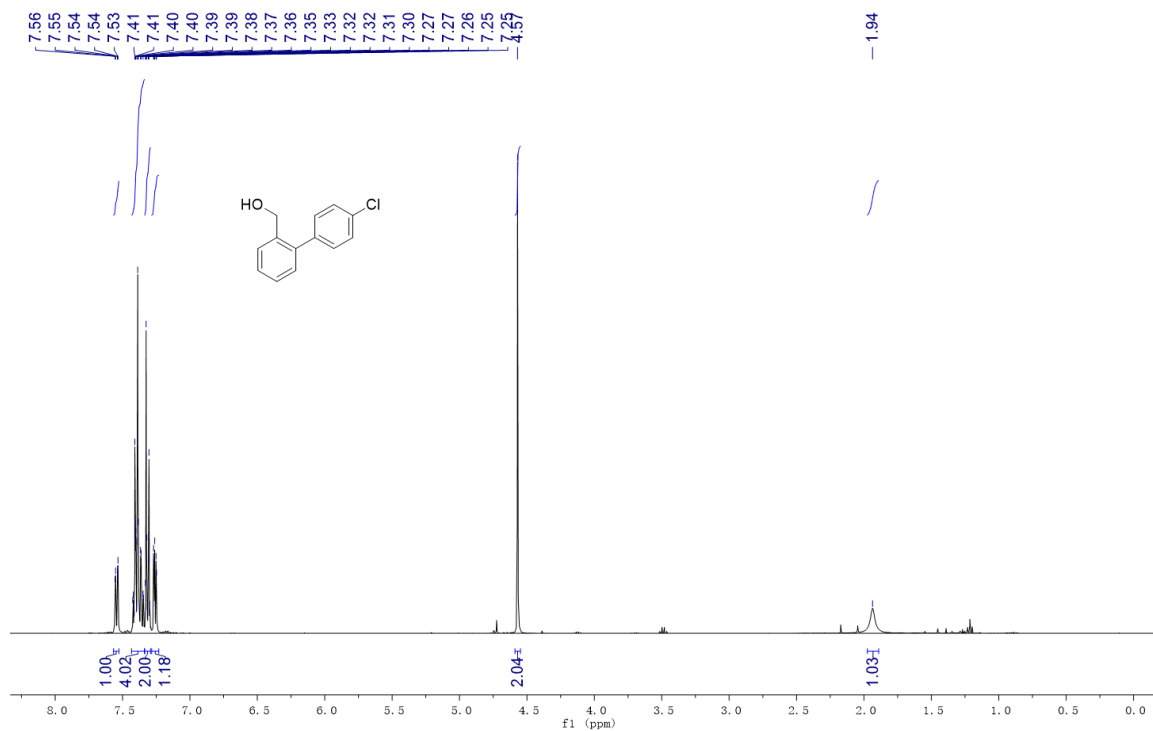

1299

1300

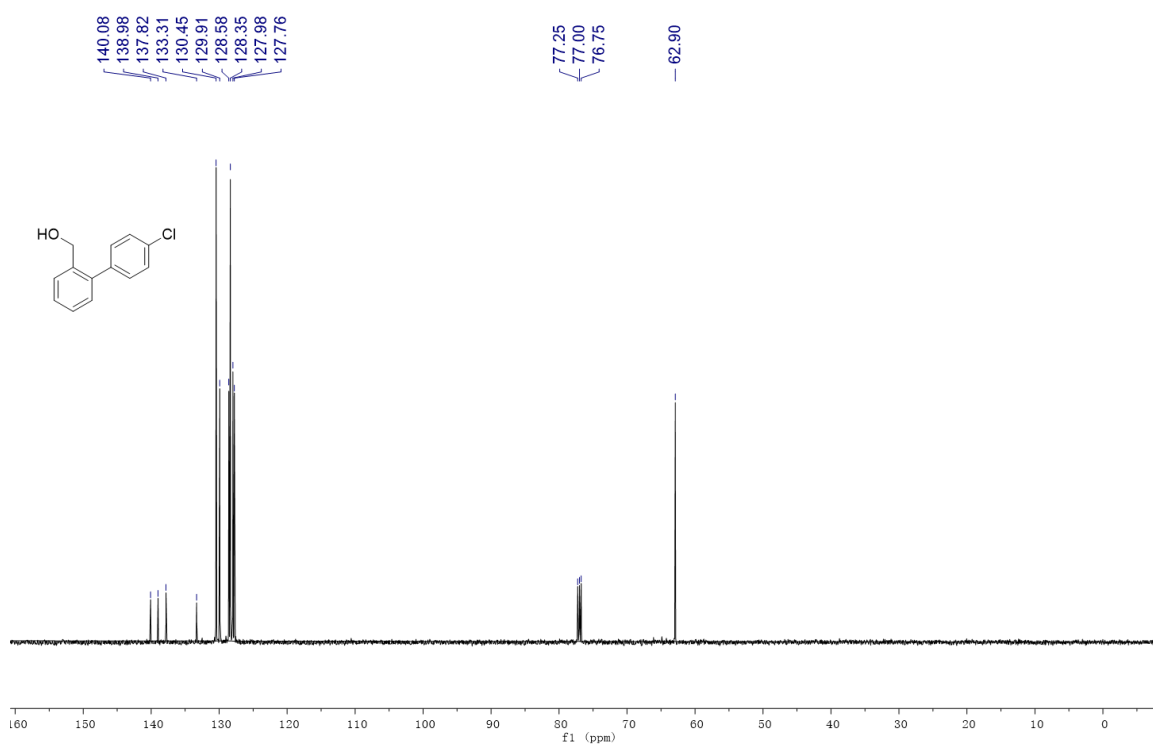

1301

1302 <sup>1</sup>H and <sup>13</sup>C spectra of product 4am

1303

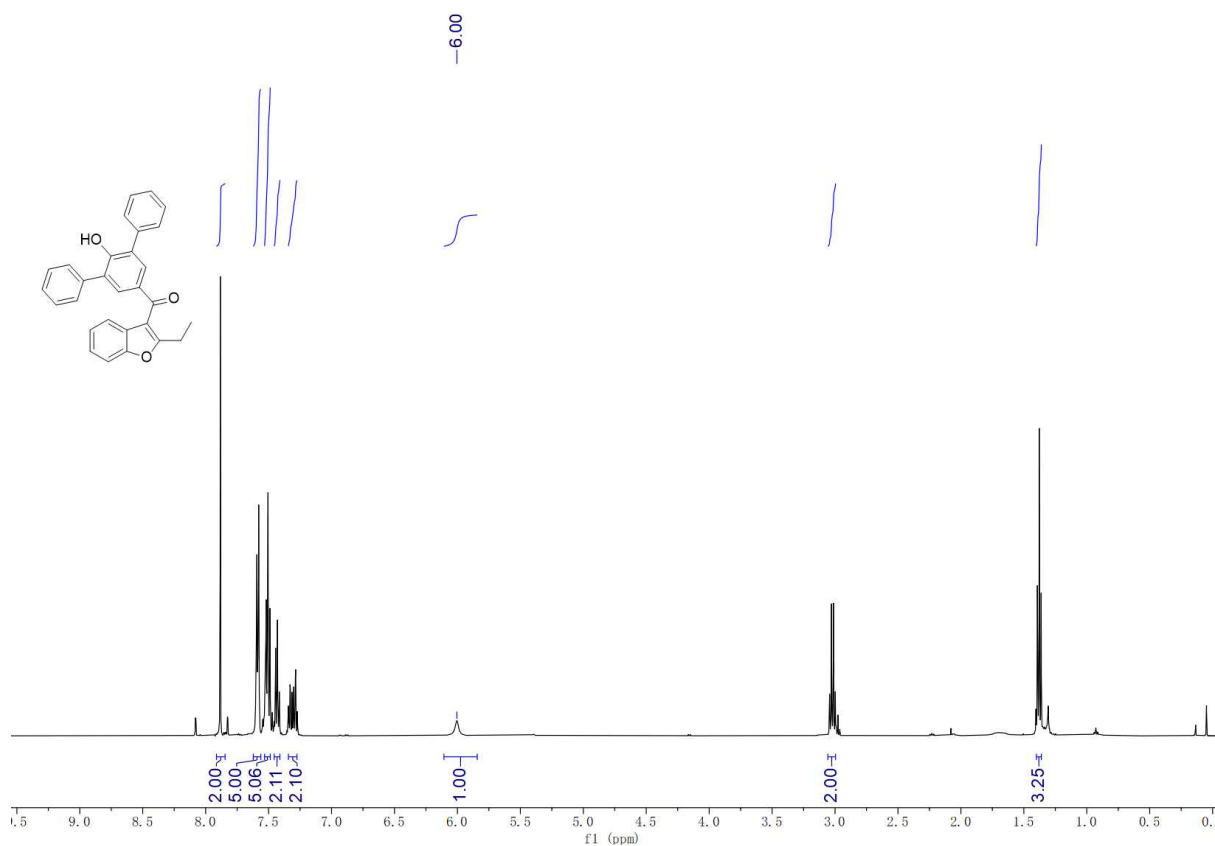

1304

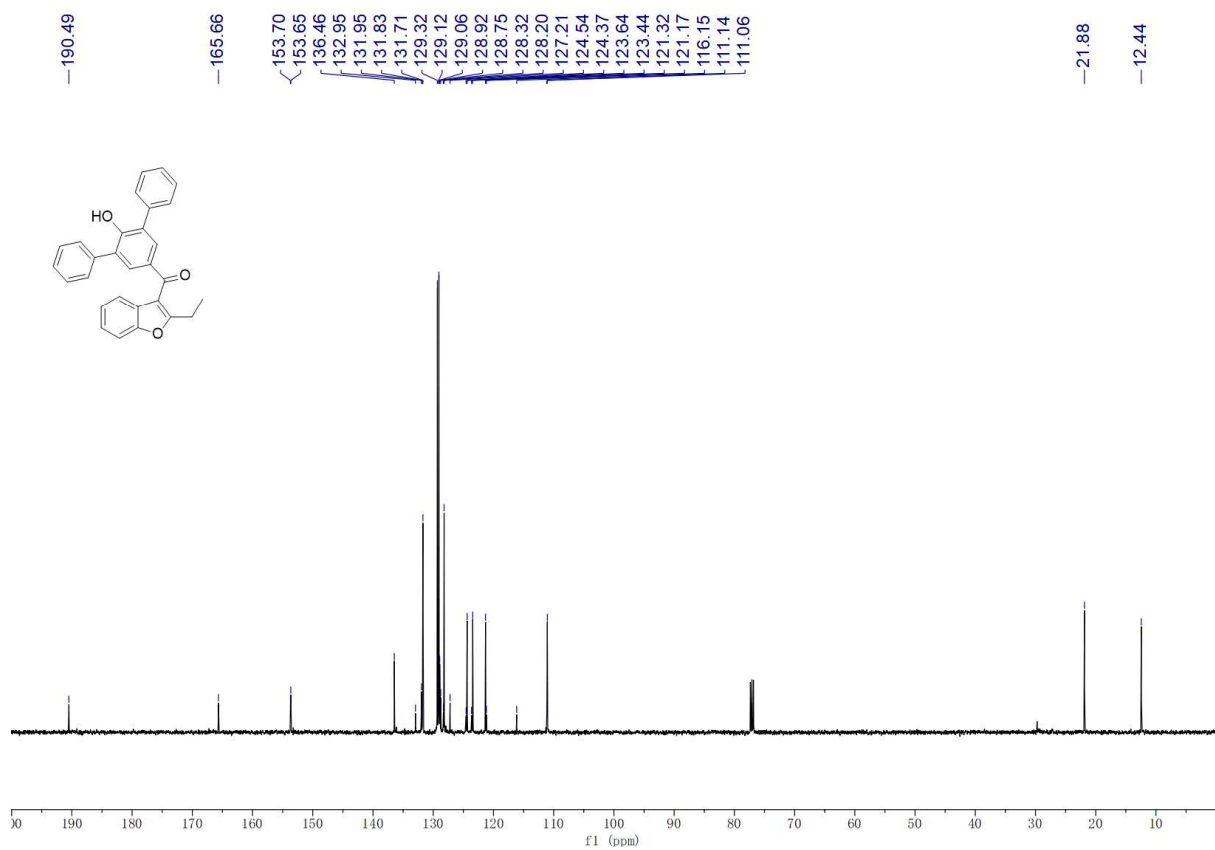

1305 **<sup>1</sup>H and <sup>13</sup>C spectra of product 4an**

1306

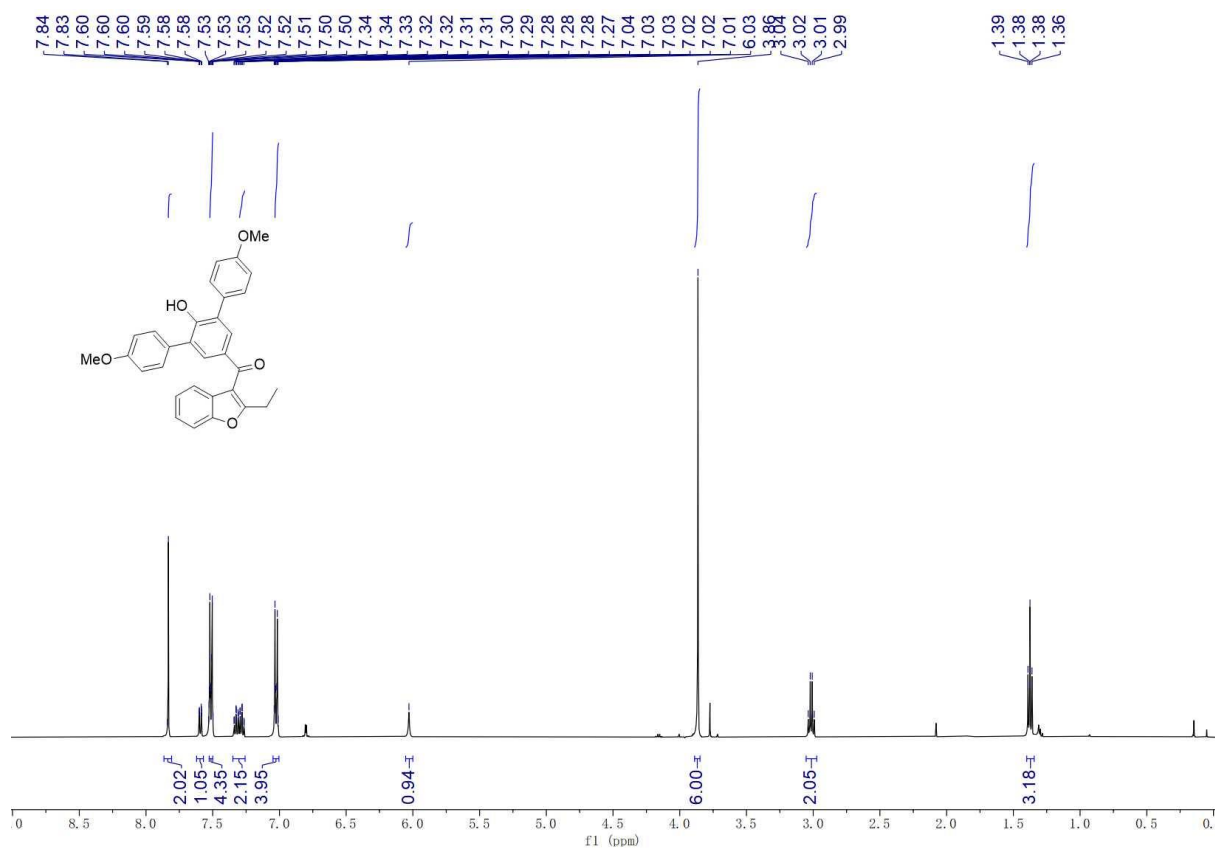

1307

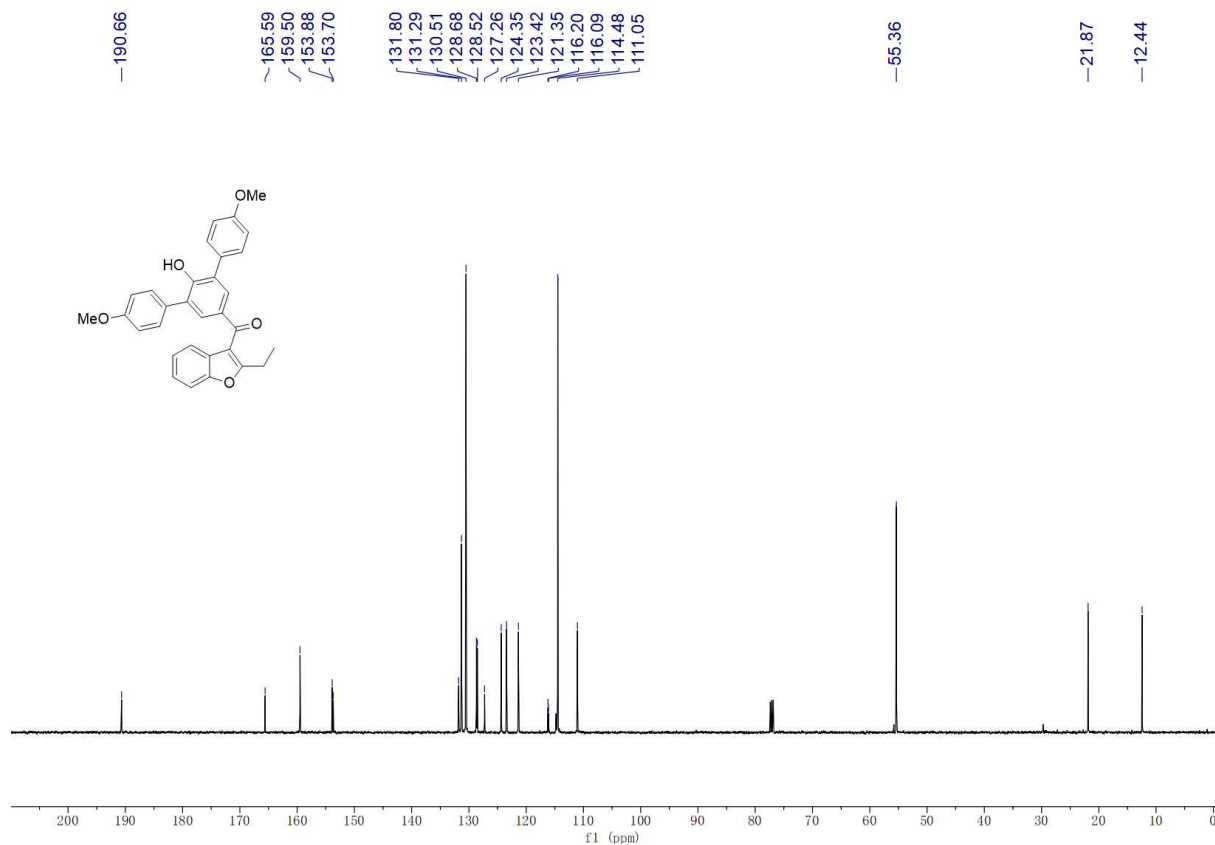

1308

1309 <sup>1</sup>H and <sup>13</sup>C spectra of product 4ao

1310

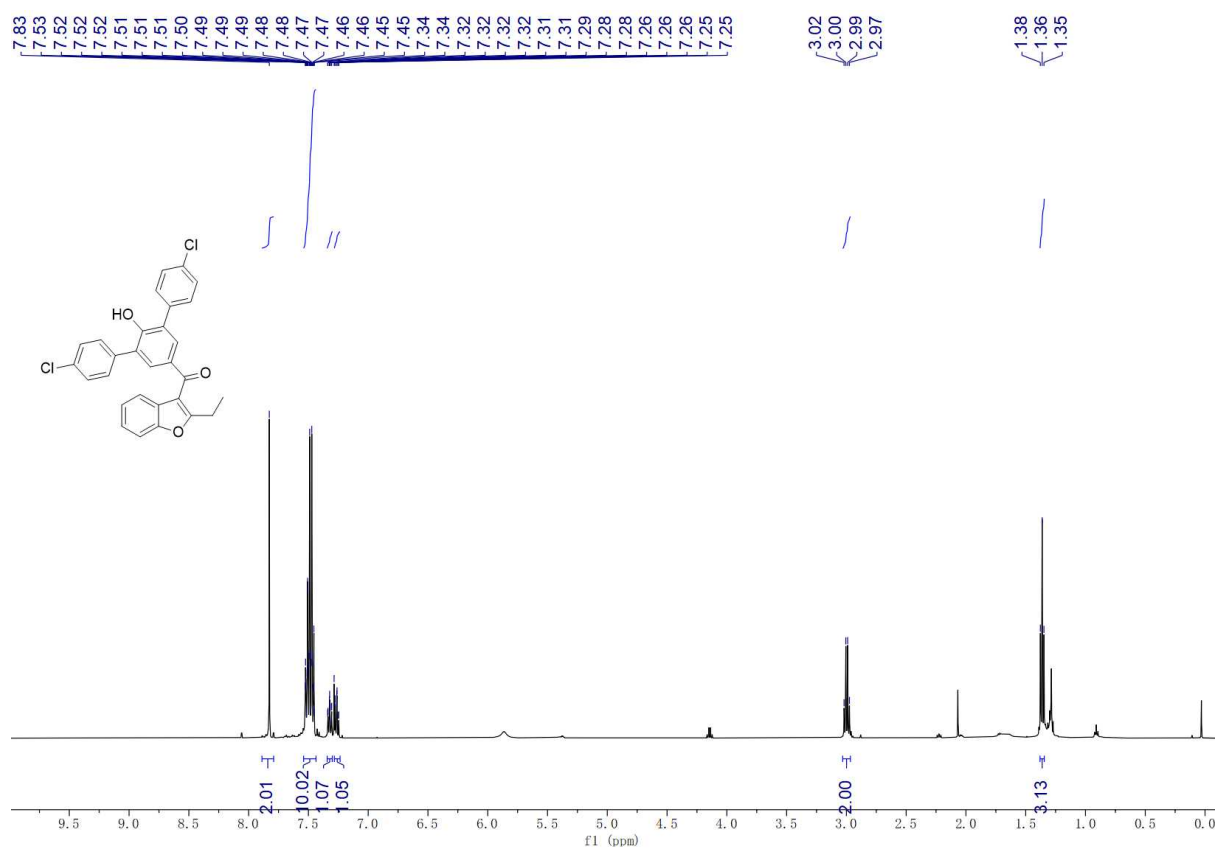

1311

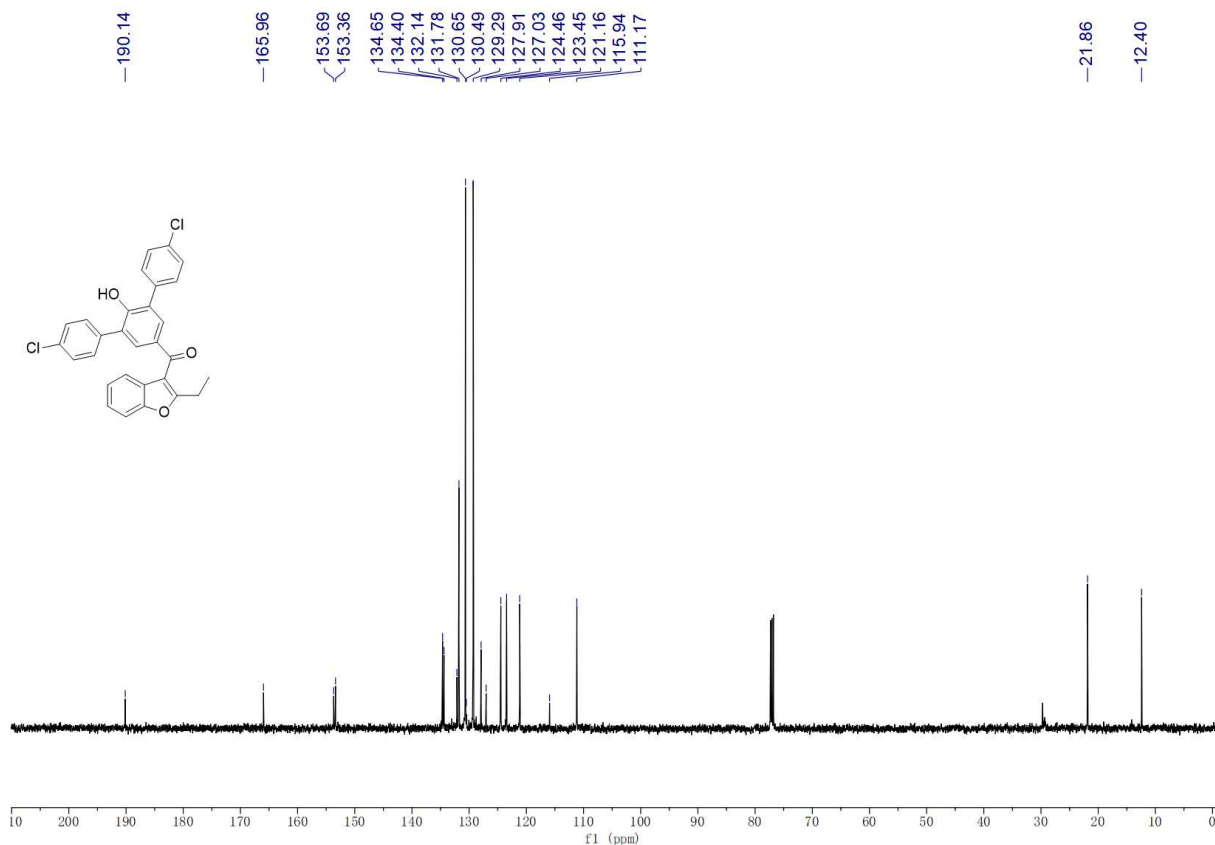

1312

1313 <sup>1</sup>H and <sup>13</sup>C- NMR spectra of product.

1314

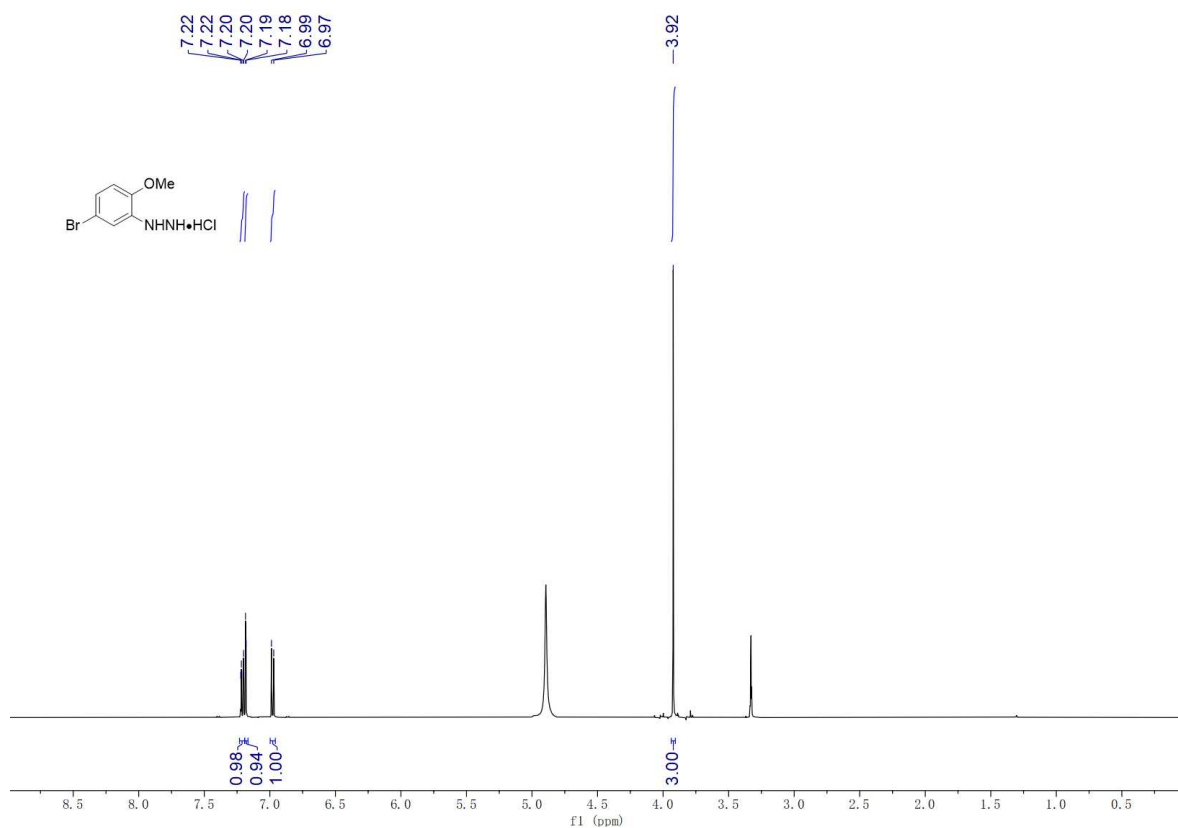

1315

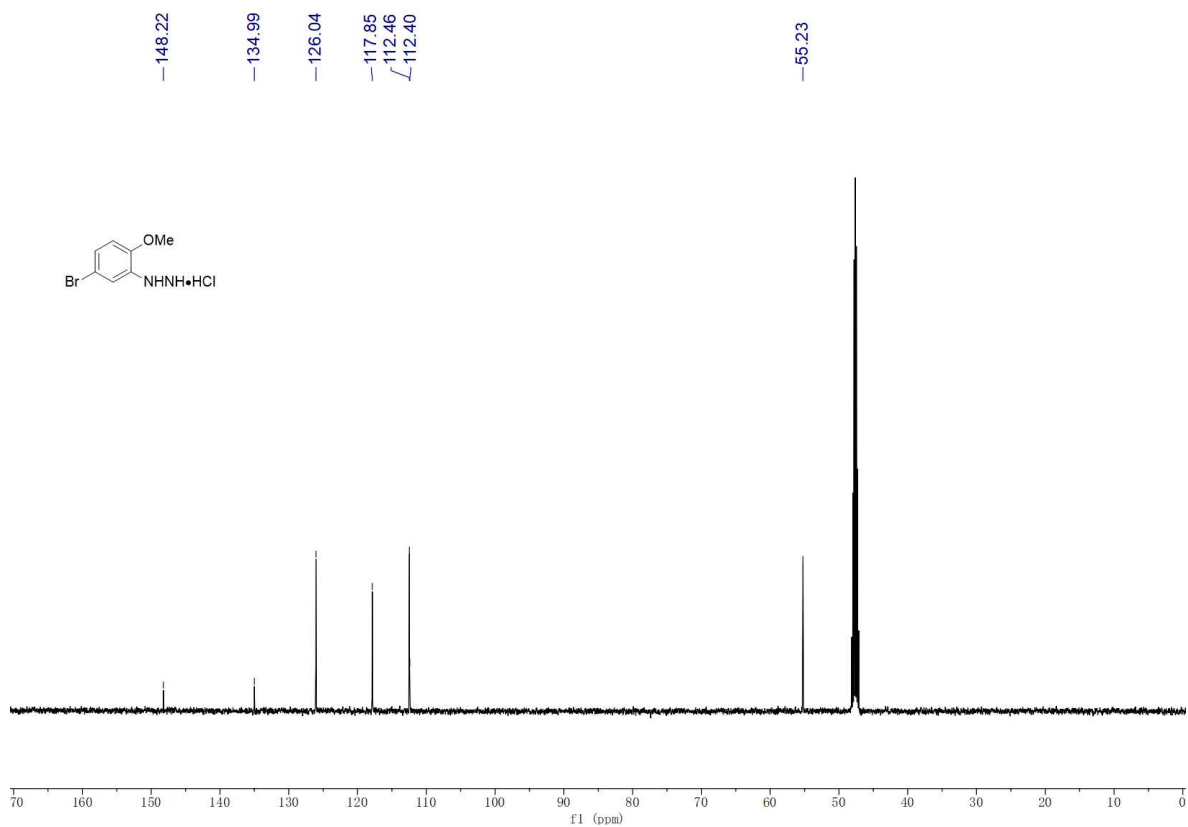

1316



1317 <sup>1</sup>H and <sup>13</sup>C spectra of product 1aa

1318

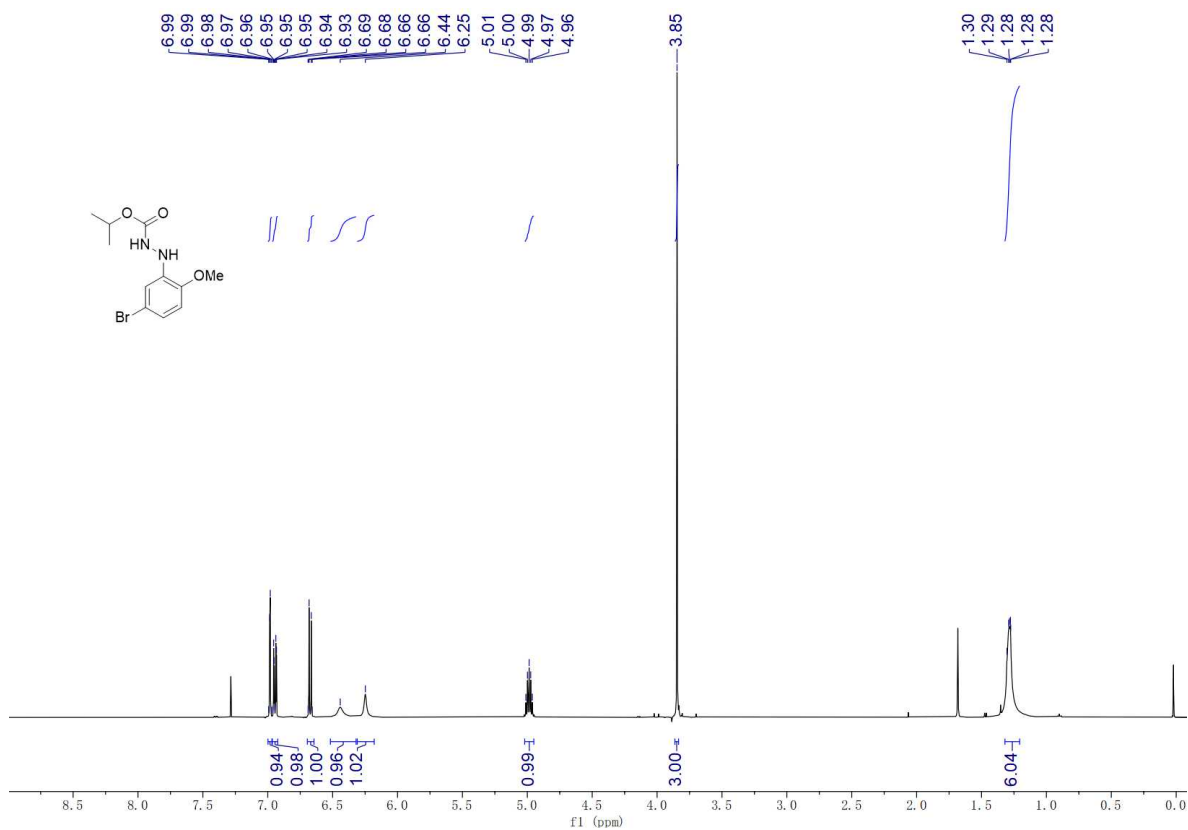

1319

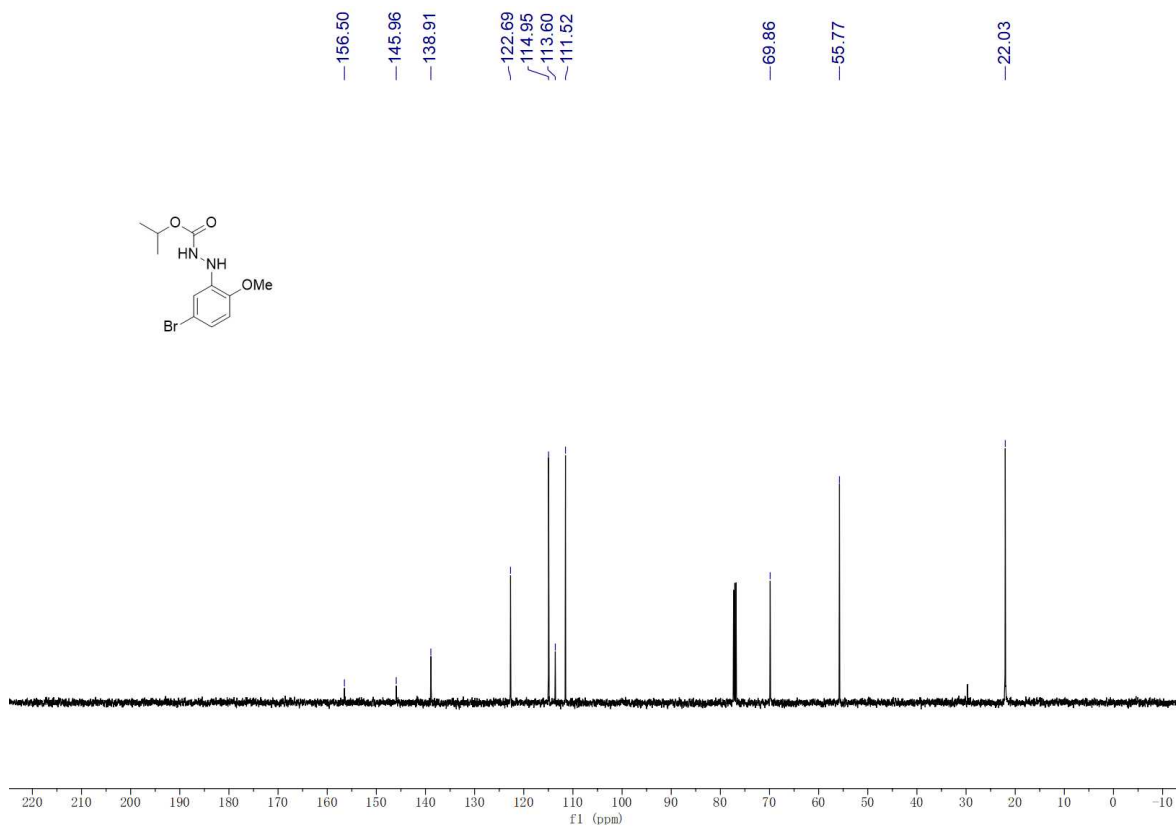

1320

1321 <sup>1</sup>H and <sup>13</sup>C spectra of product bifenazate.

1322

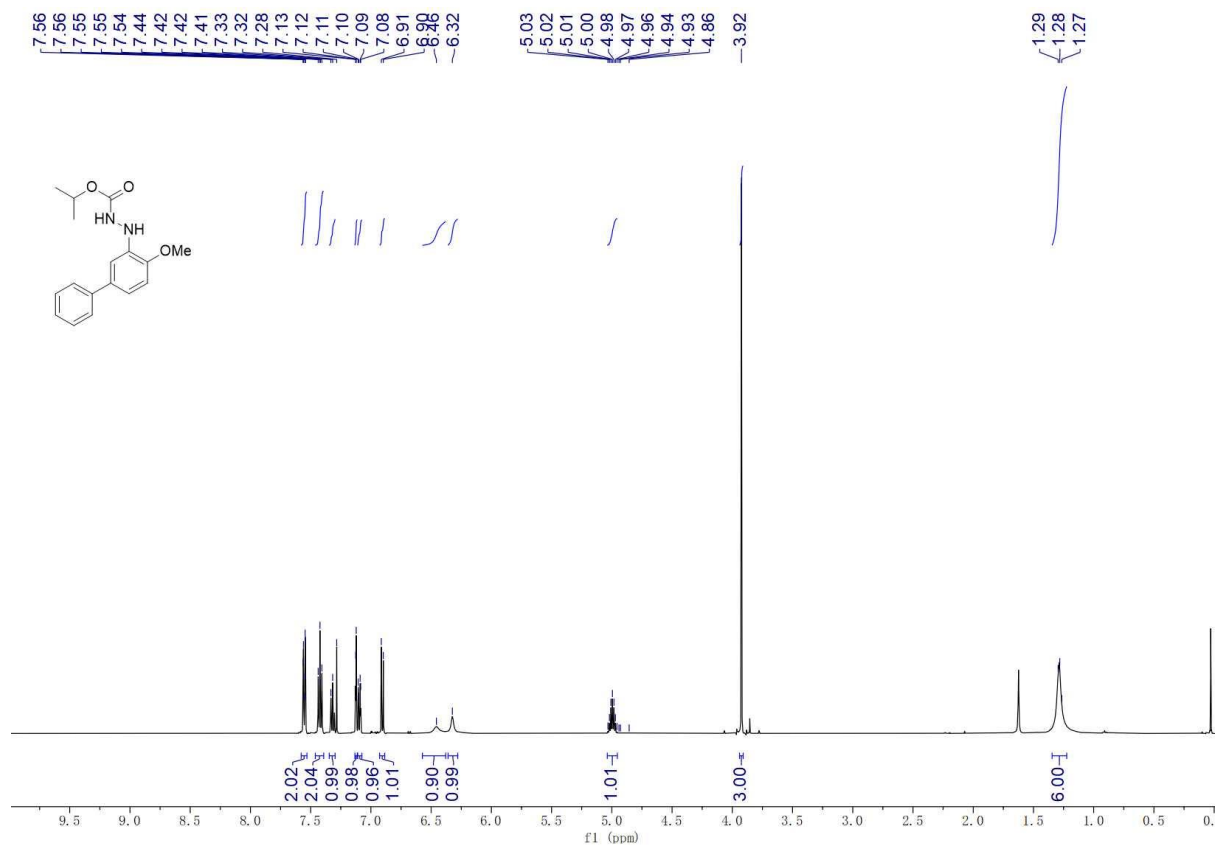

1323

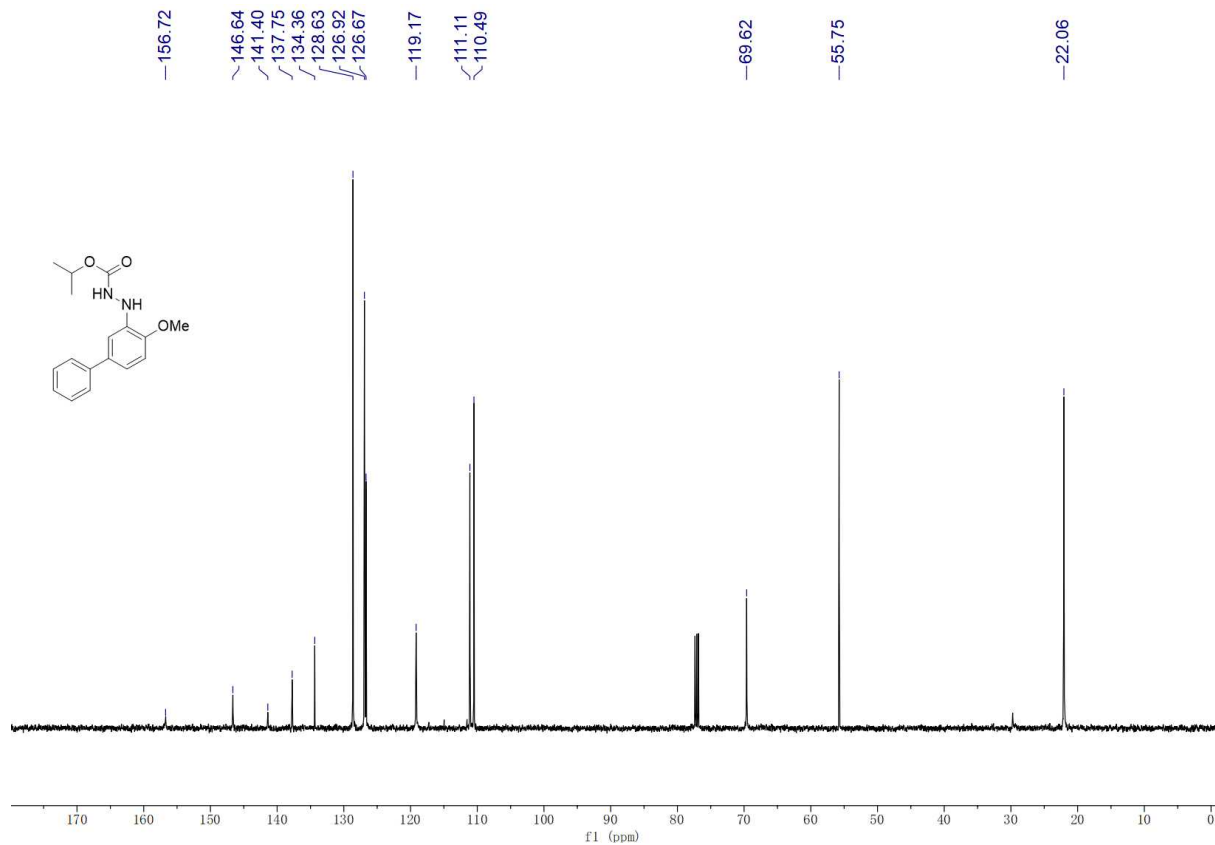

1324

1325 <sup>1</sup>H and <sup>13</sup>C-NMR spectra of product 8a.

1326

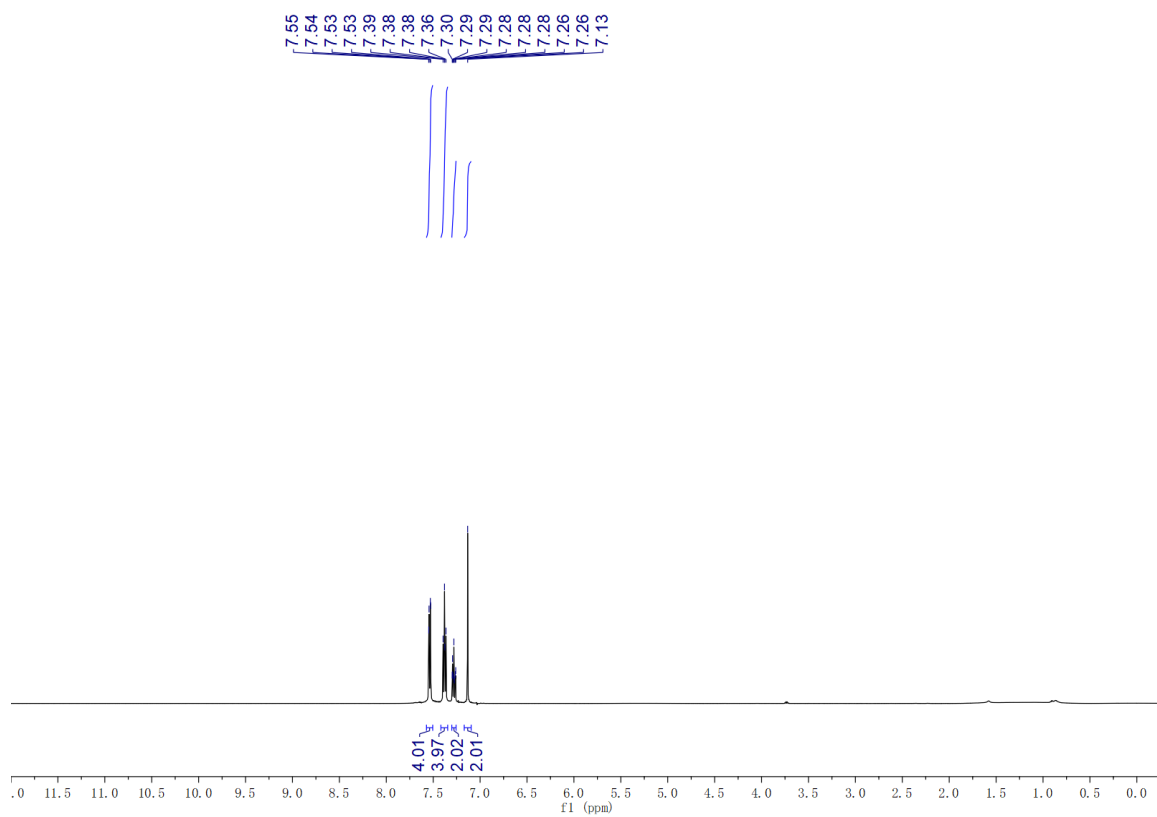

1327

1328

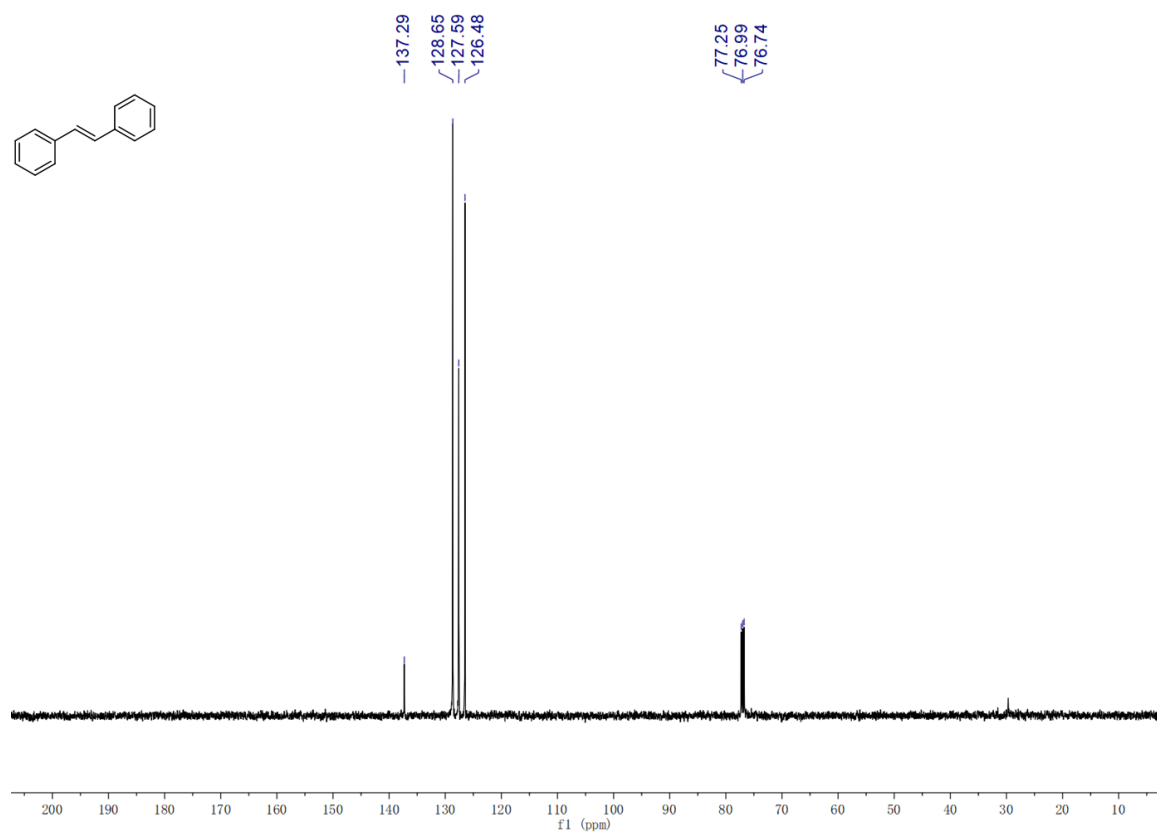

1329 <sup>1</sup>H and <sup>13</sup>C-NMR spectra of product 8b.

1330

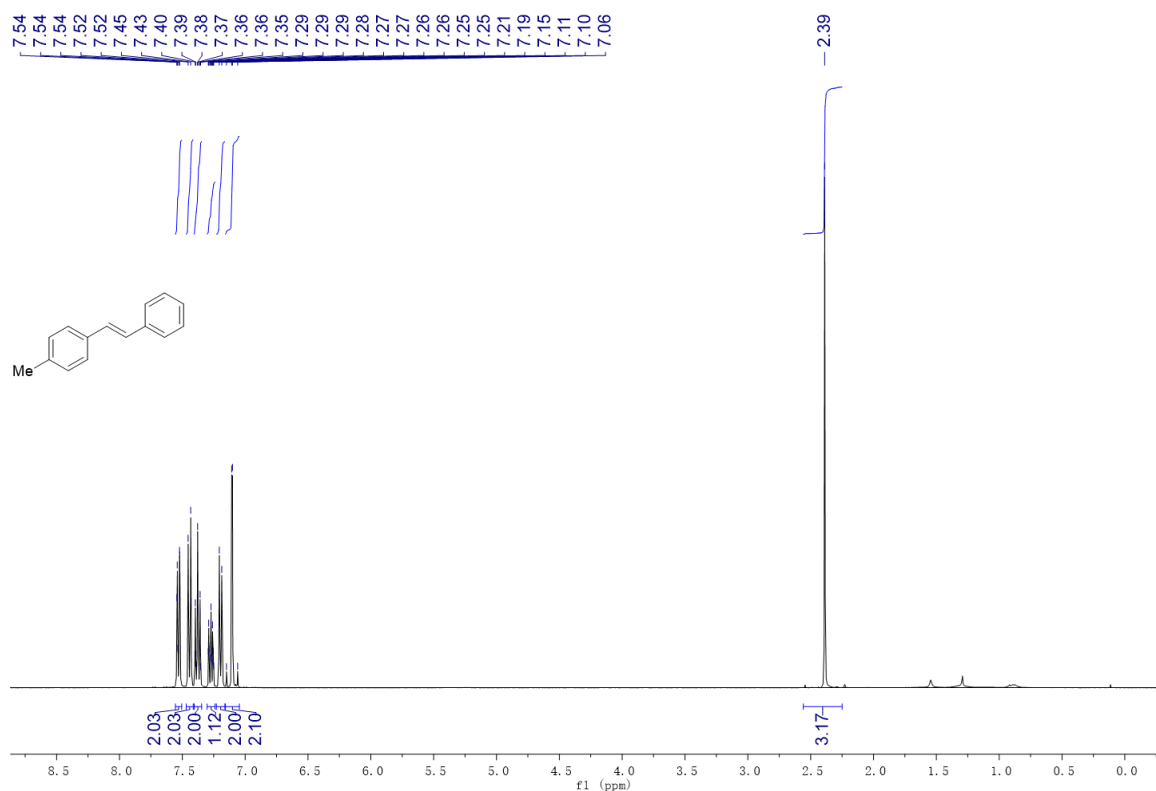

1331

1332

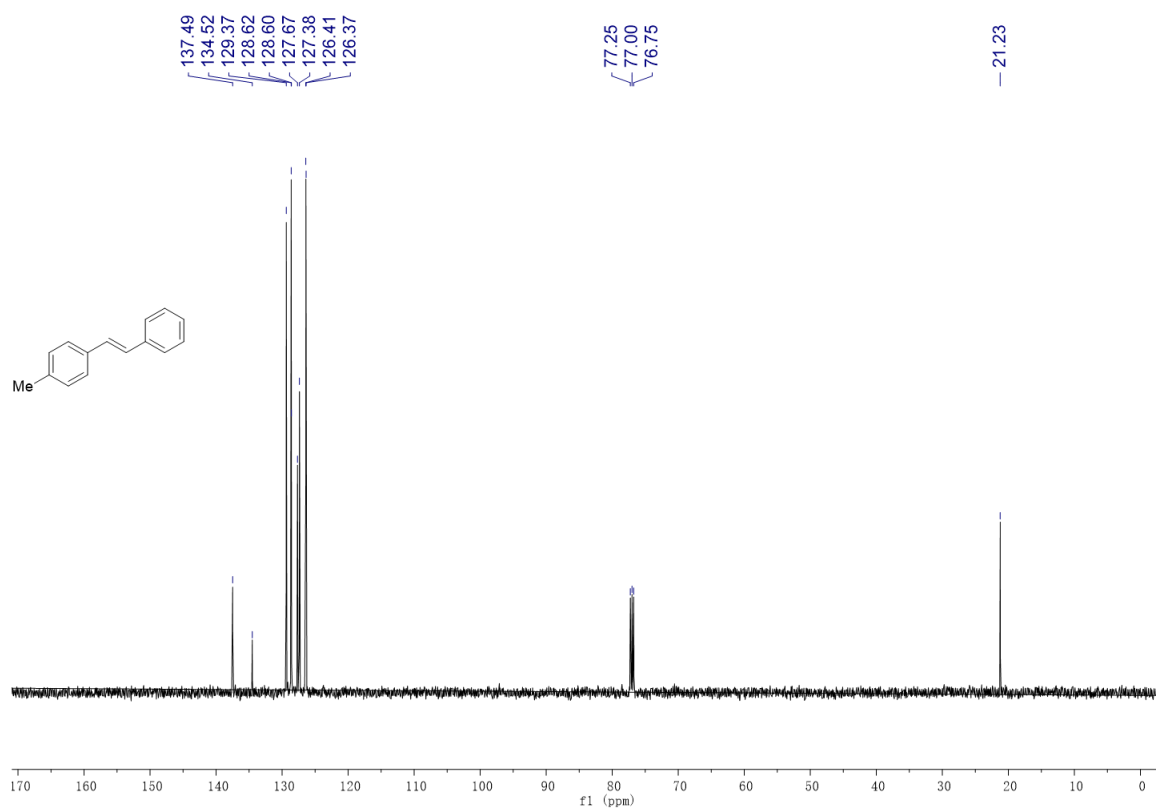

1333

1334

1335 <sup>1</sup>H and <sup>13</sup>C-NMR spectra of product 8c.

1336

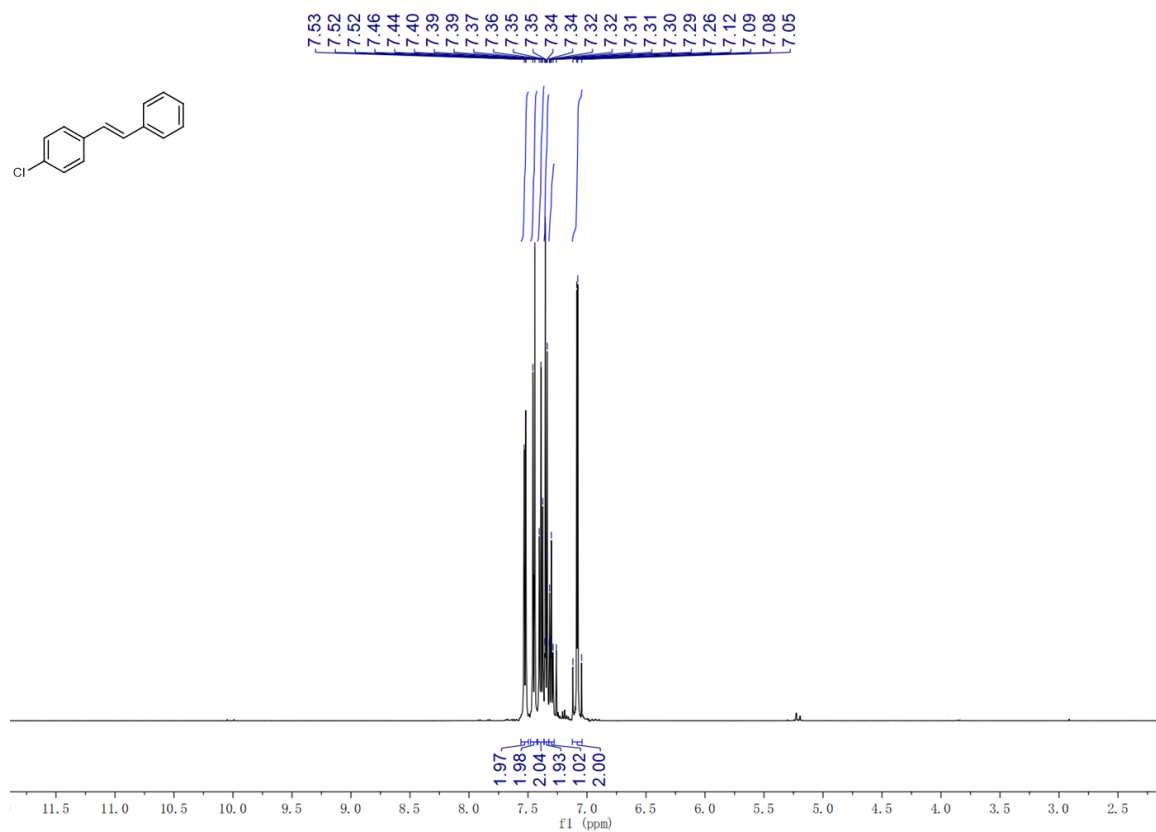

1337

1338

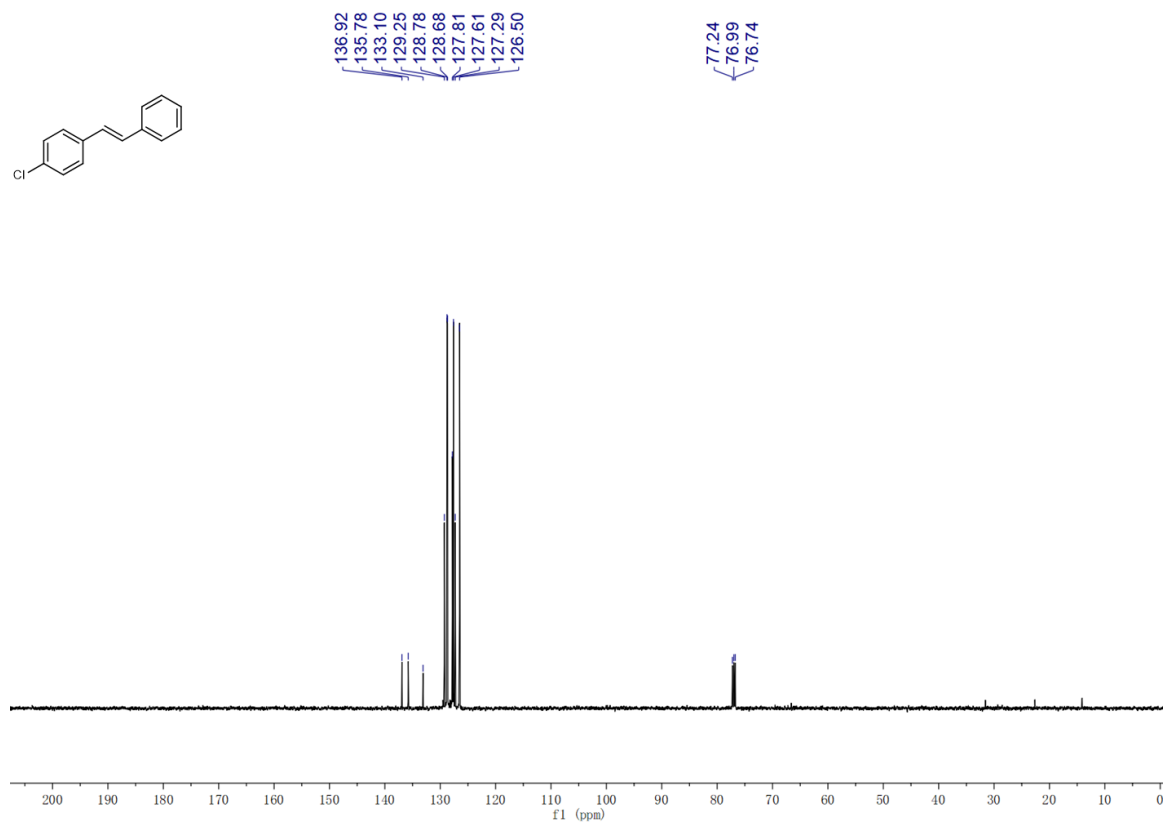

1339 <sup>1</sup>H and <sup>13</sup>C, <sup>9</sup>F-NMR spectra of product 8d.

1340

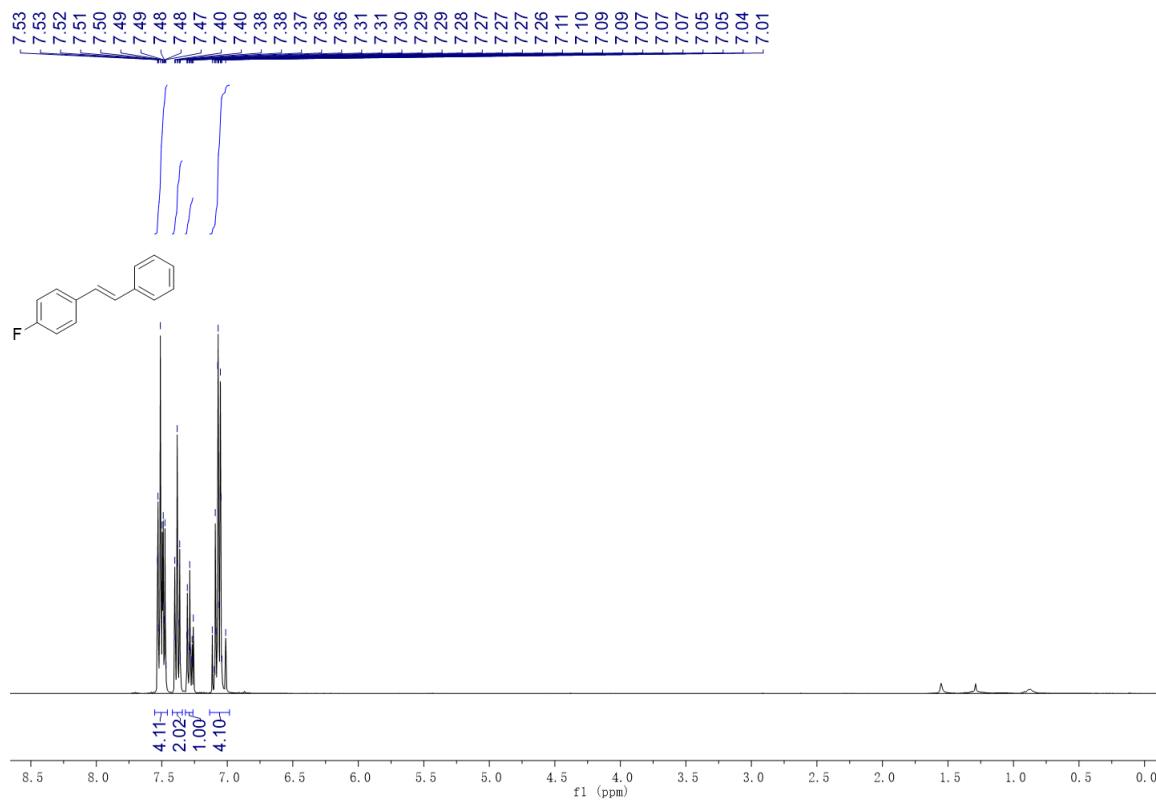

1341

1342

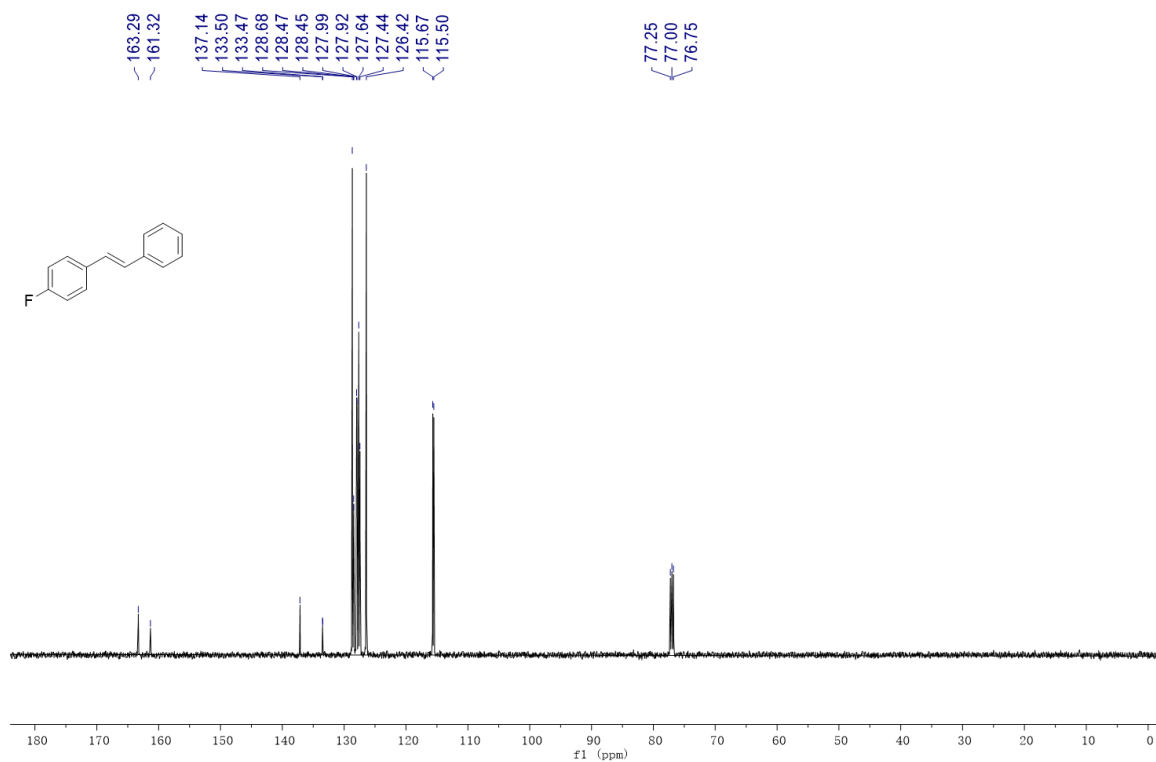

1343

1344

1345

1346

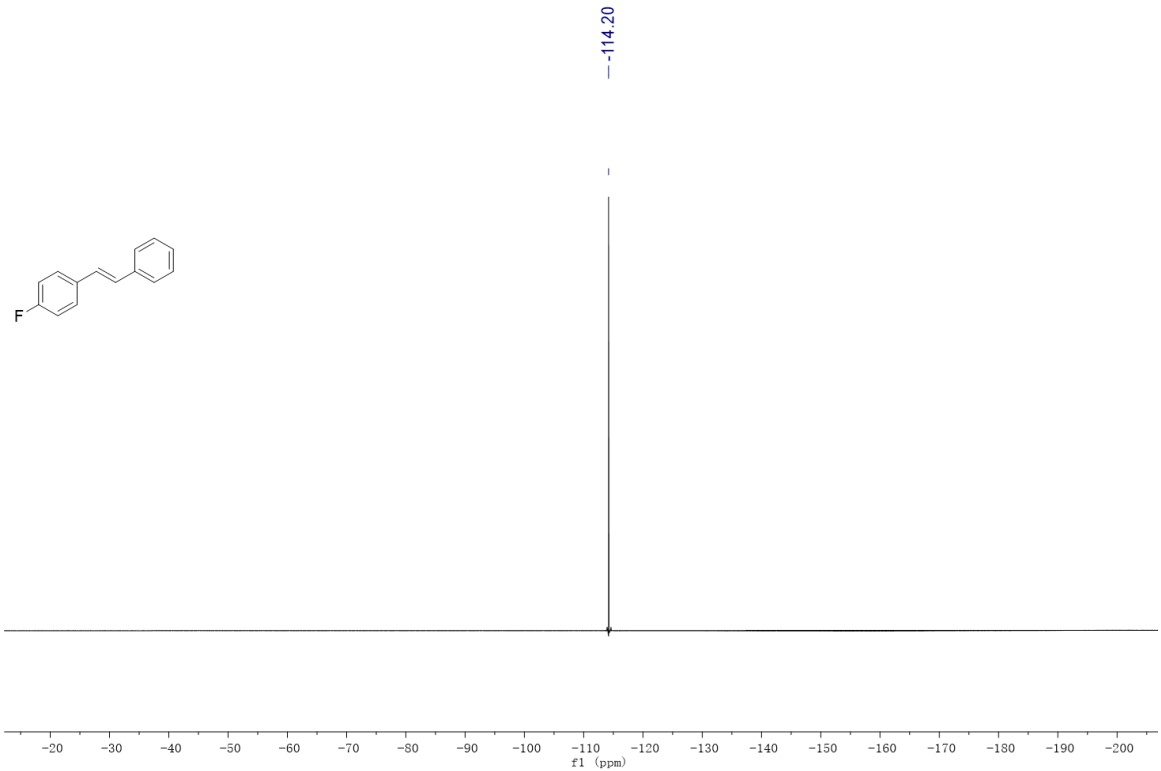

1347

1348

1349 <sup>1</sup>H, <sup>13</sup>C-NMR spectra of product 8e.

1350

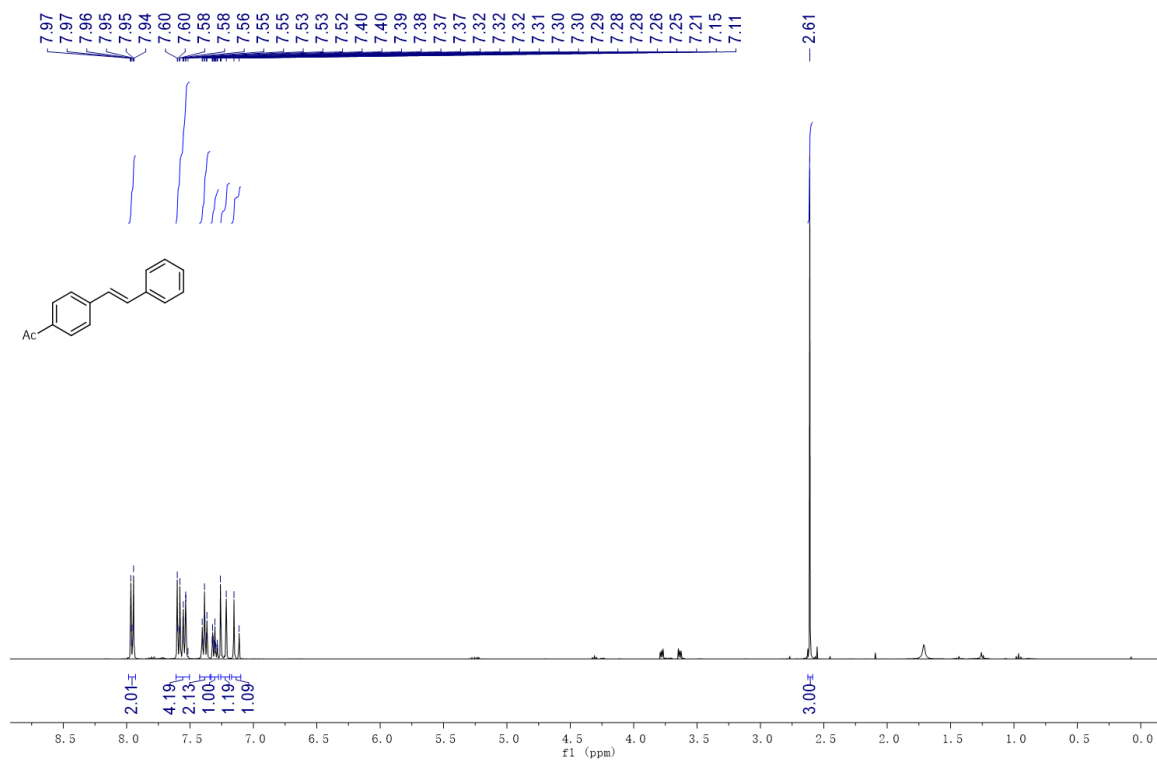

1351

1352

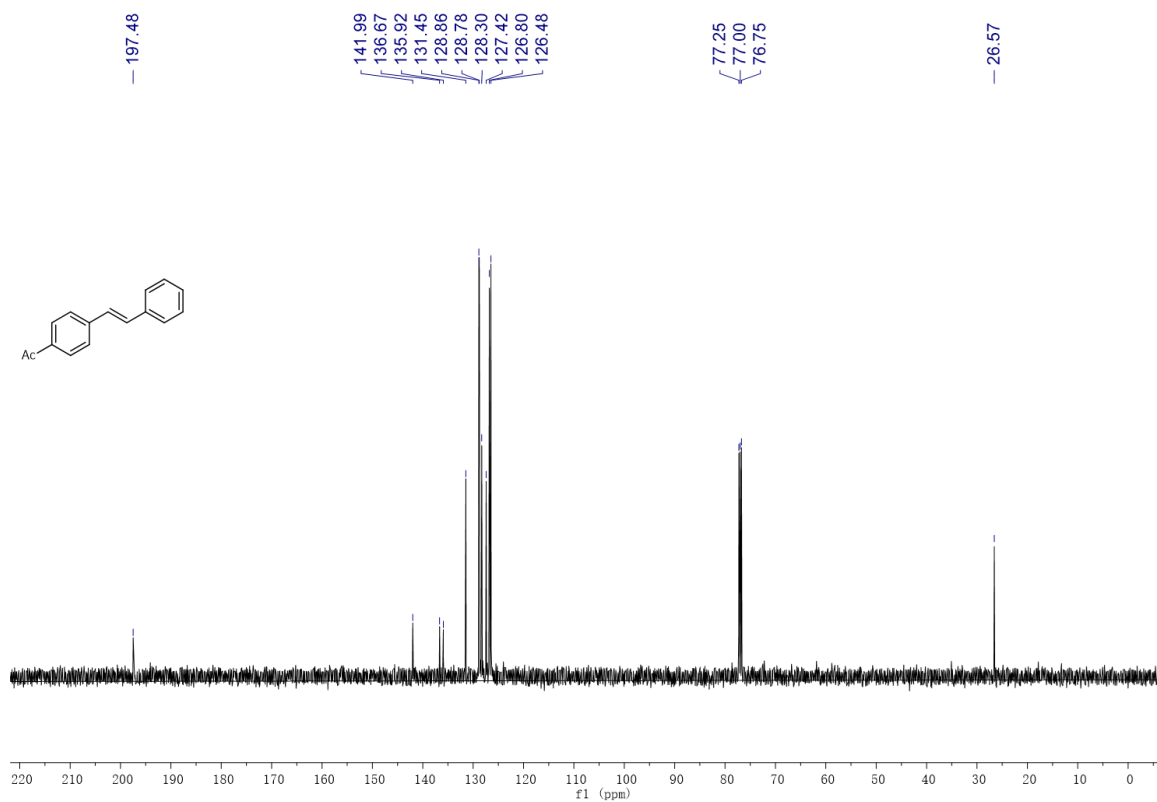

1353

1354



1355 <sup>1</sup>H, <sup>13</sup>C-NMR spectra of product 8f.

1356

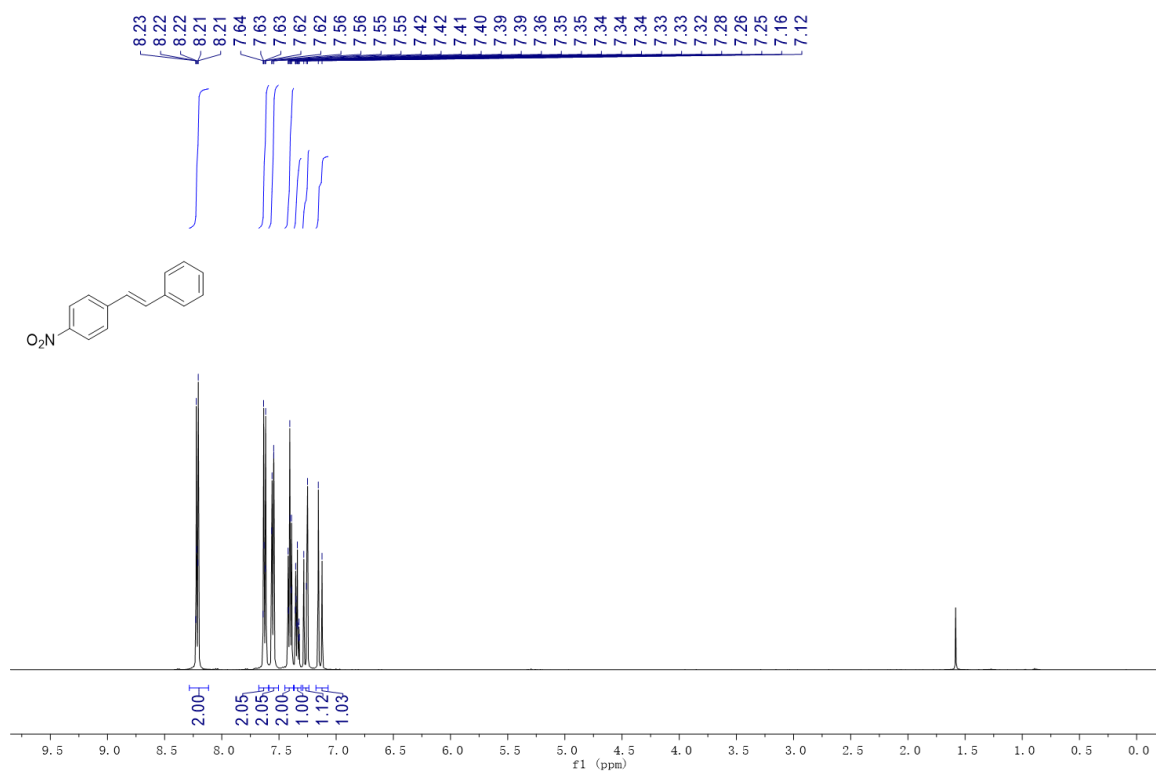

1357

1358

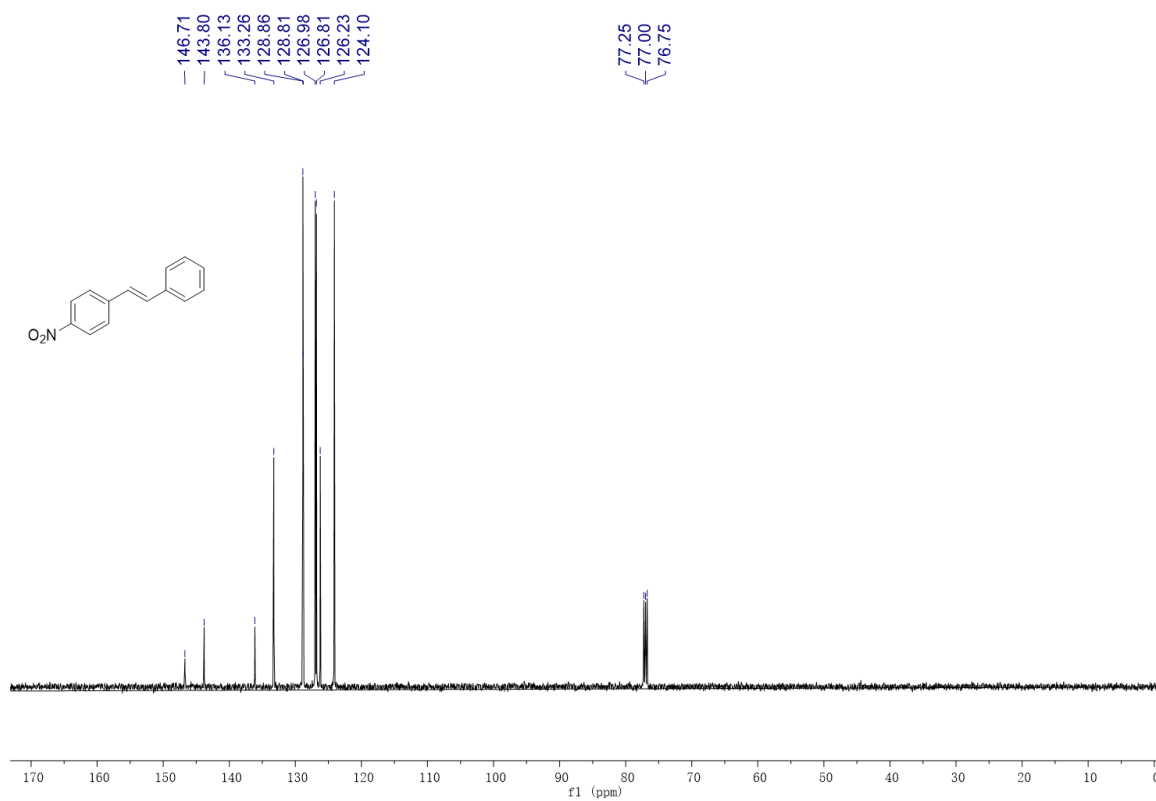

1359

1360

1361 <sup>1</sup>H, <sup>13</sup>C-NMR spectra of product 8g.

1362

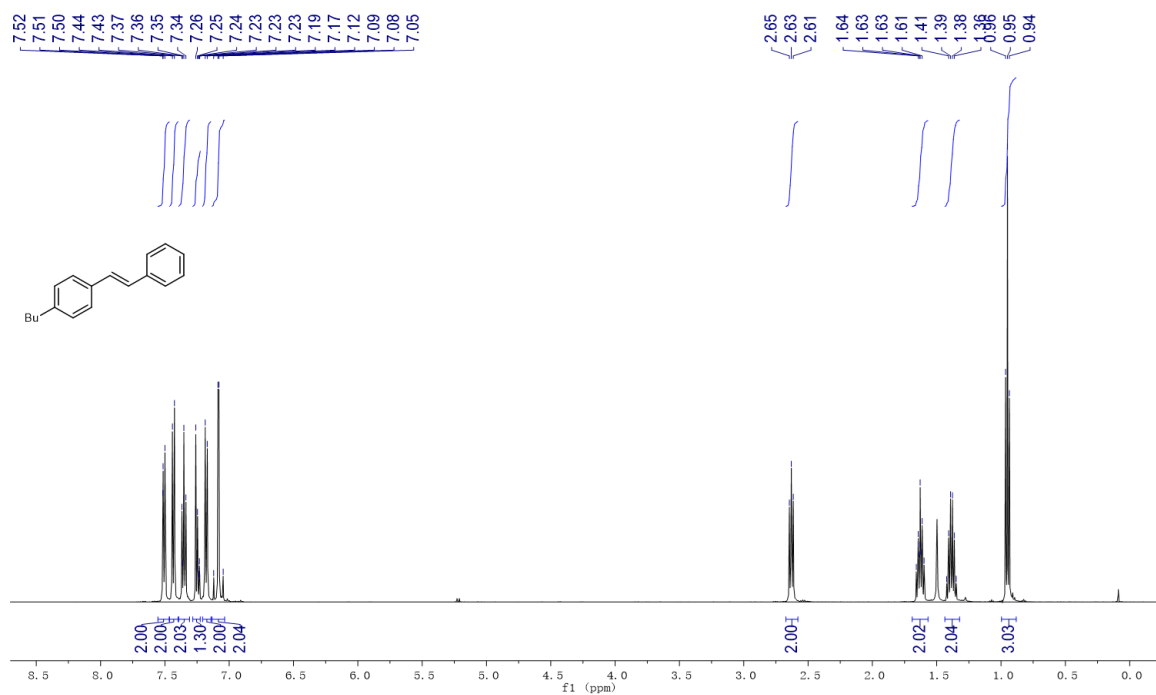

1363

1364

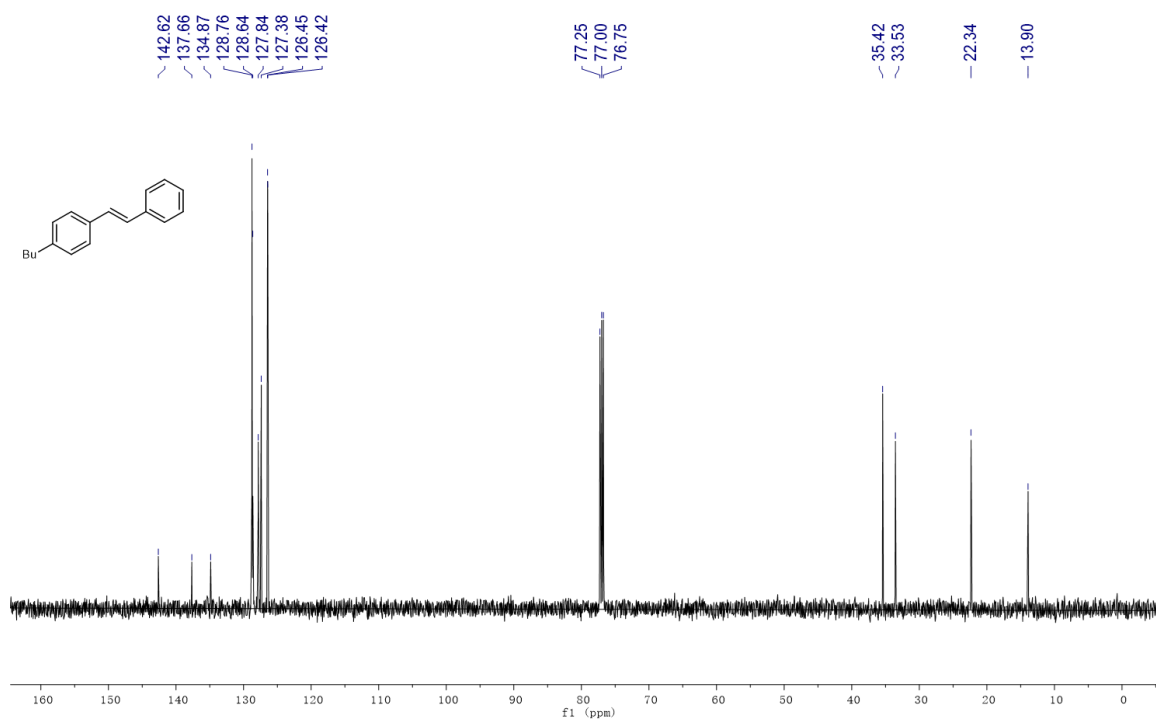

1365

1366

1367 <sup>1</sup>H and <sup>13</sup>C-NMR spectra of product 8h.

1368

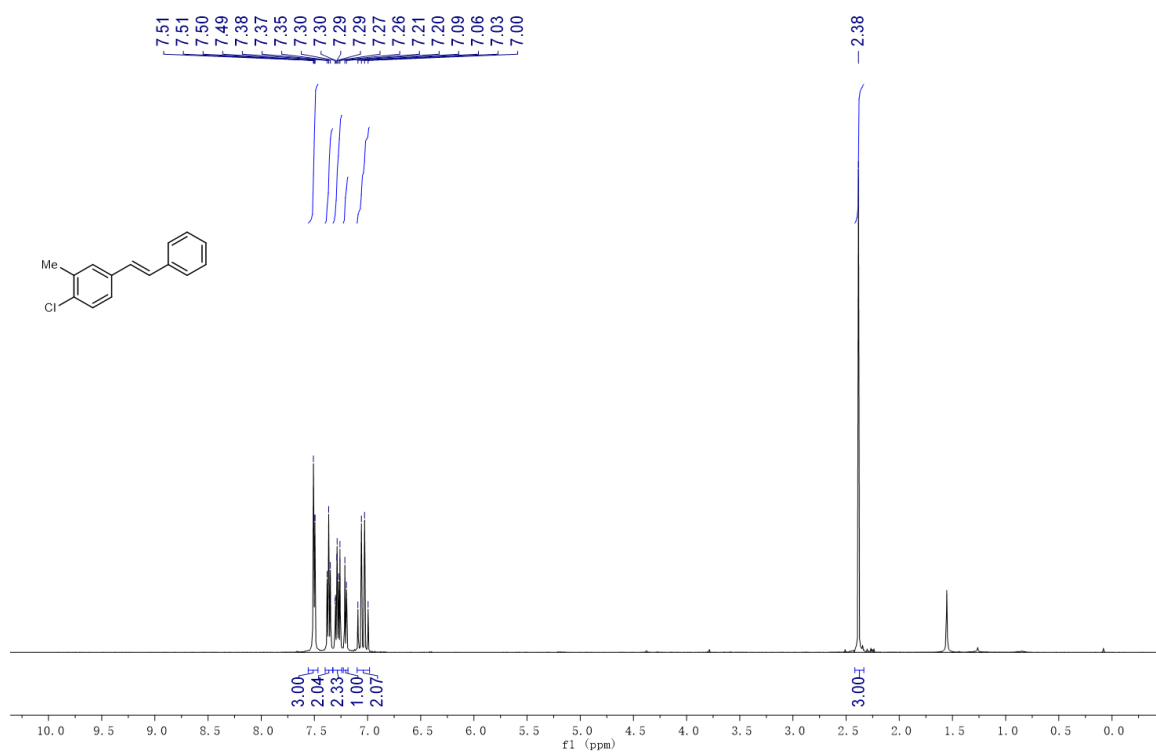

1369

1370

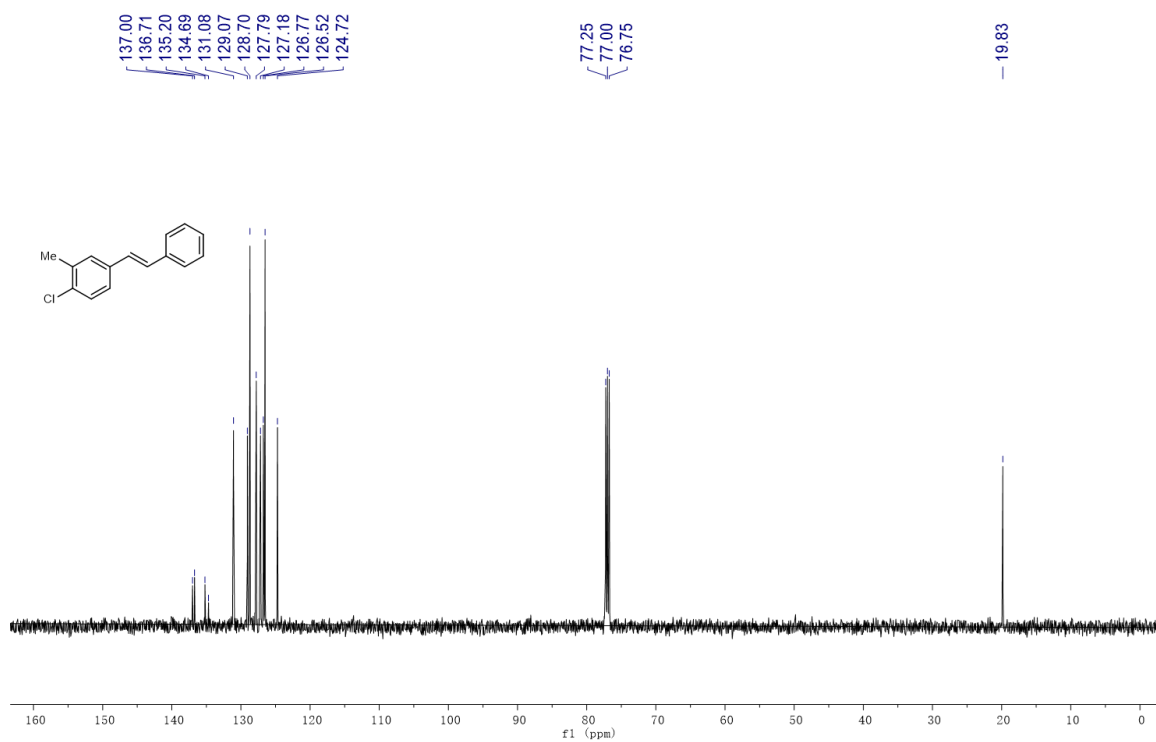

1371

1372

1373 <sup>1</sup>H and <sup>13</sup>C-NMR spectra of product 8i.

1374

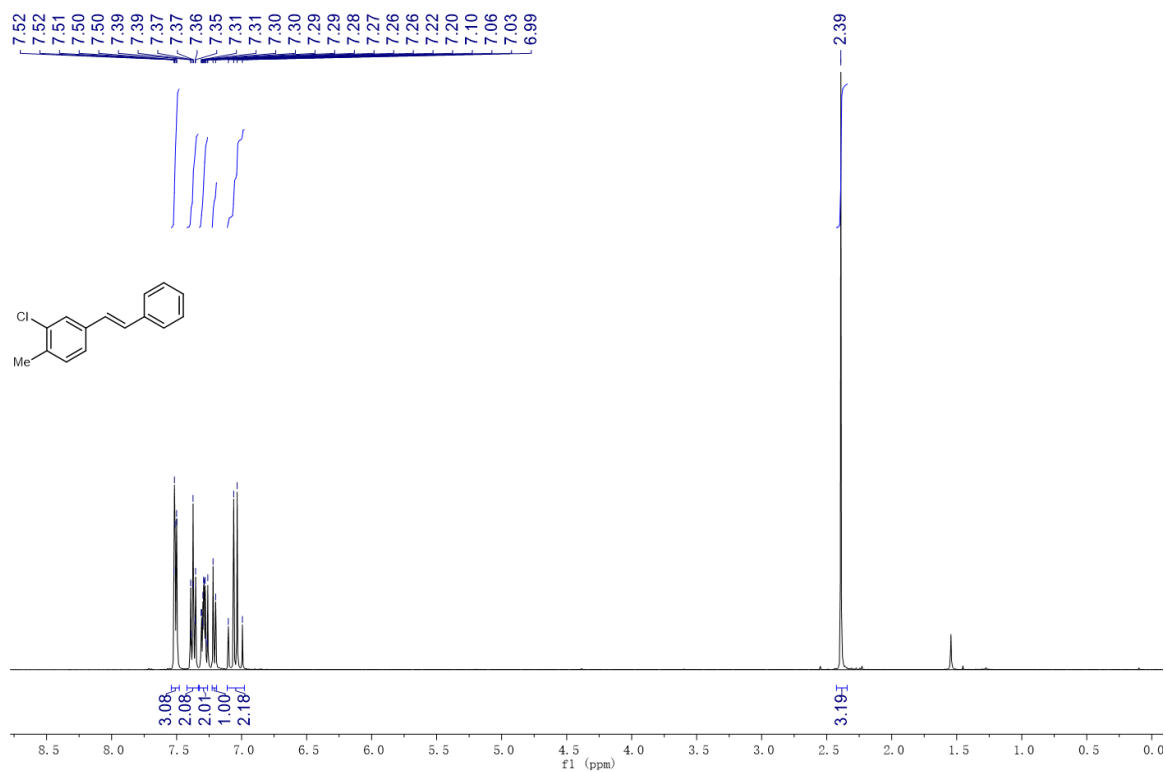

1375

1376

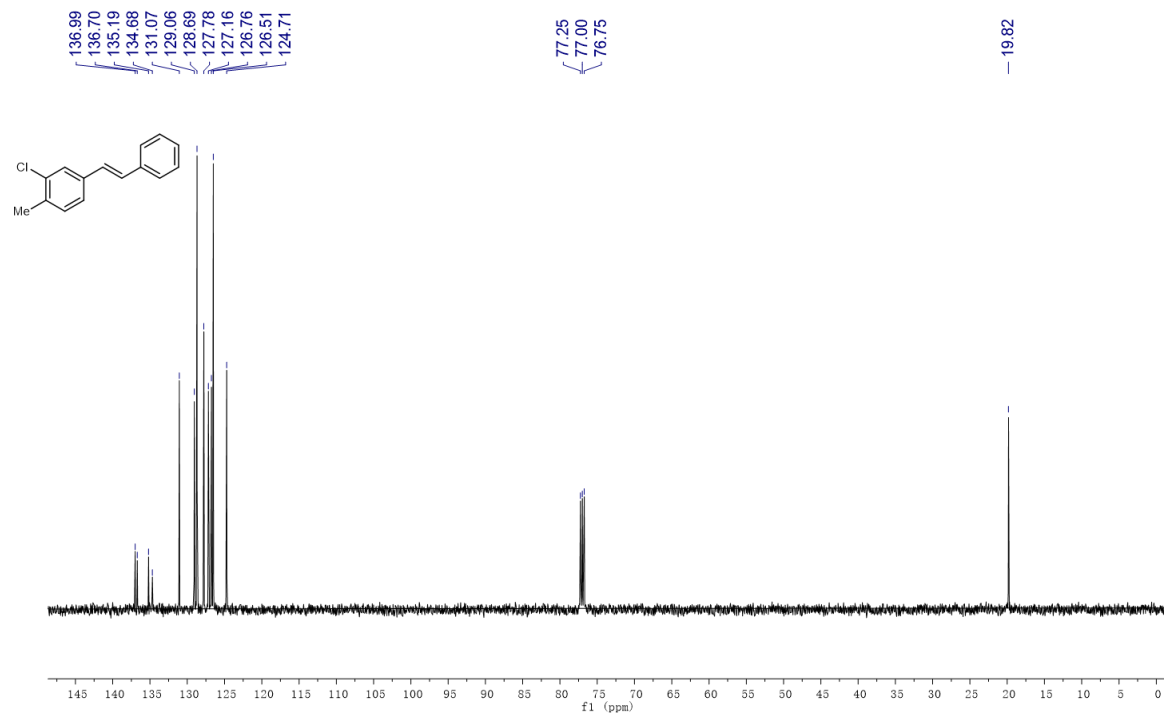

1377

1378

1379 <sup>1</sup>H and <sup>13</sup>C-NMR spectra of product 9a.

1380

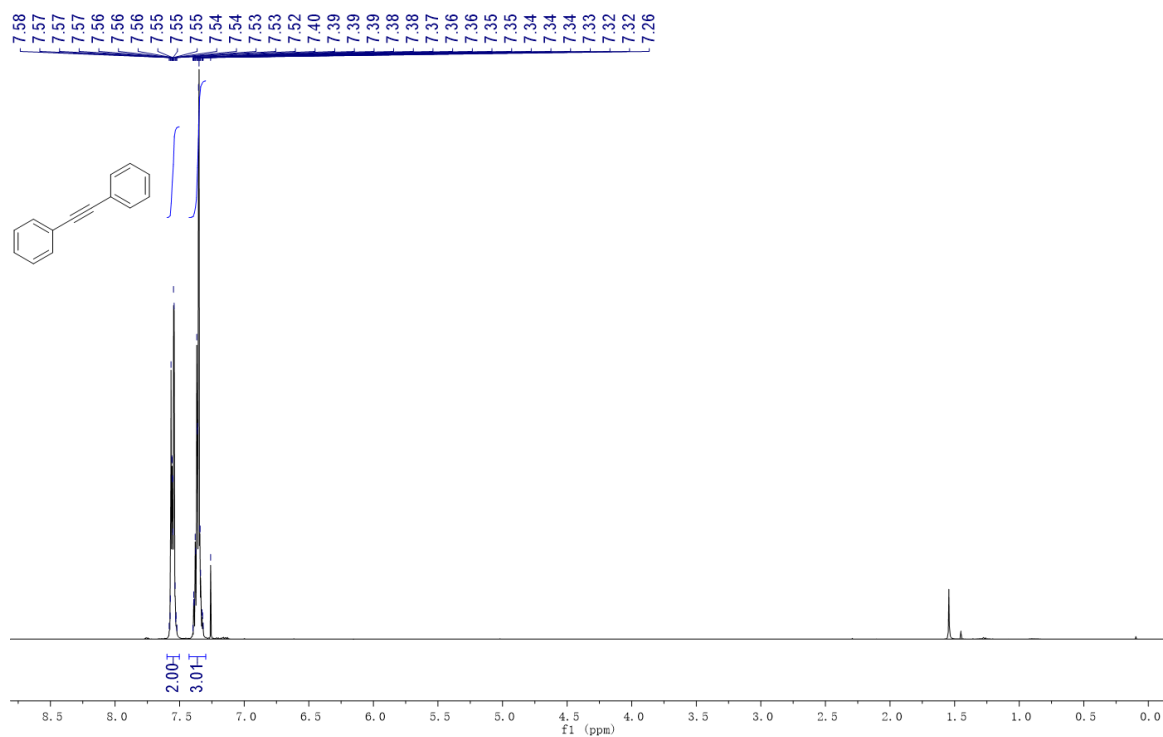

1381

1382

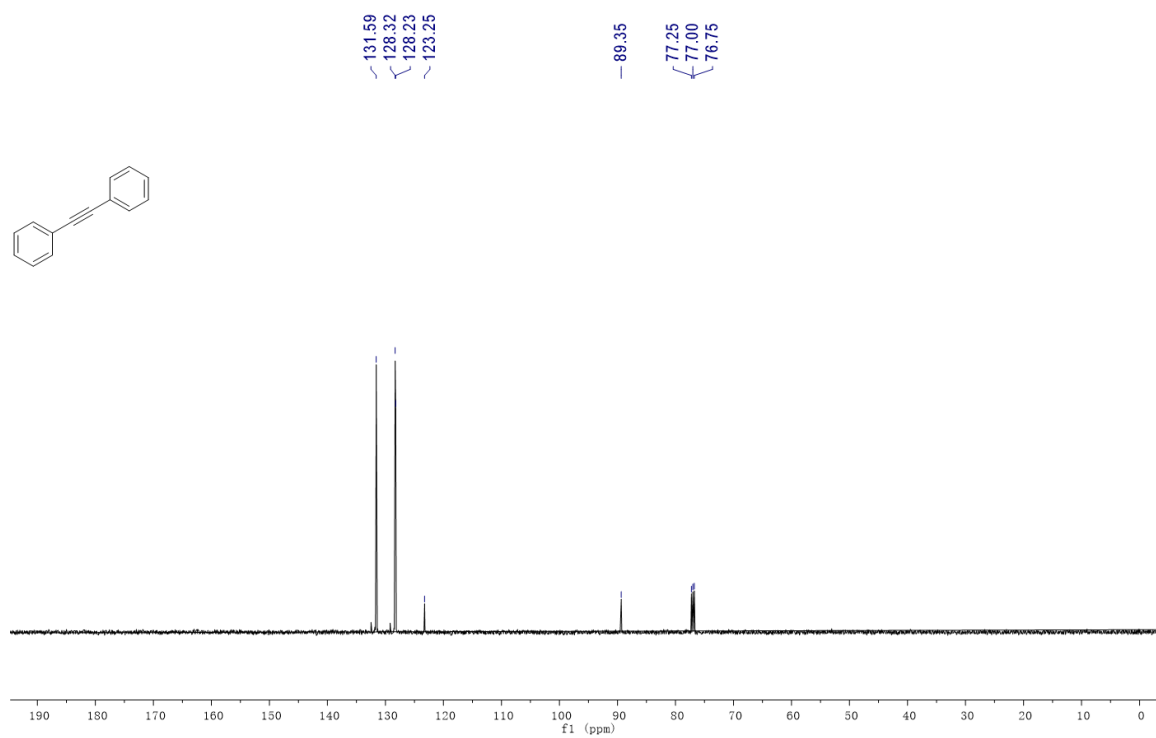

1383

1384

1385 **<sup>1</sup>H and <sup>13</sup>C-NMR spectra of product 9b.**

1386

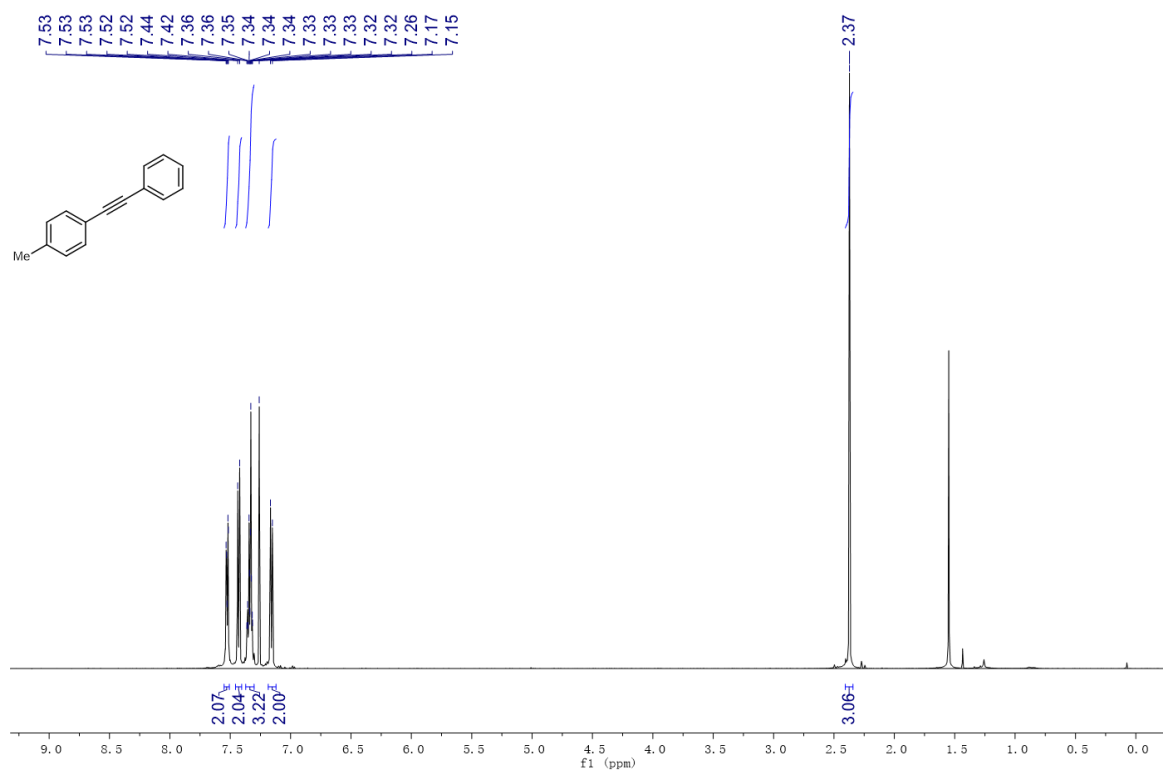

1387

1388

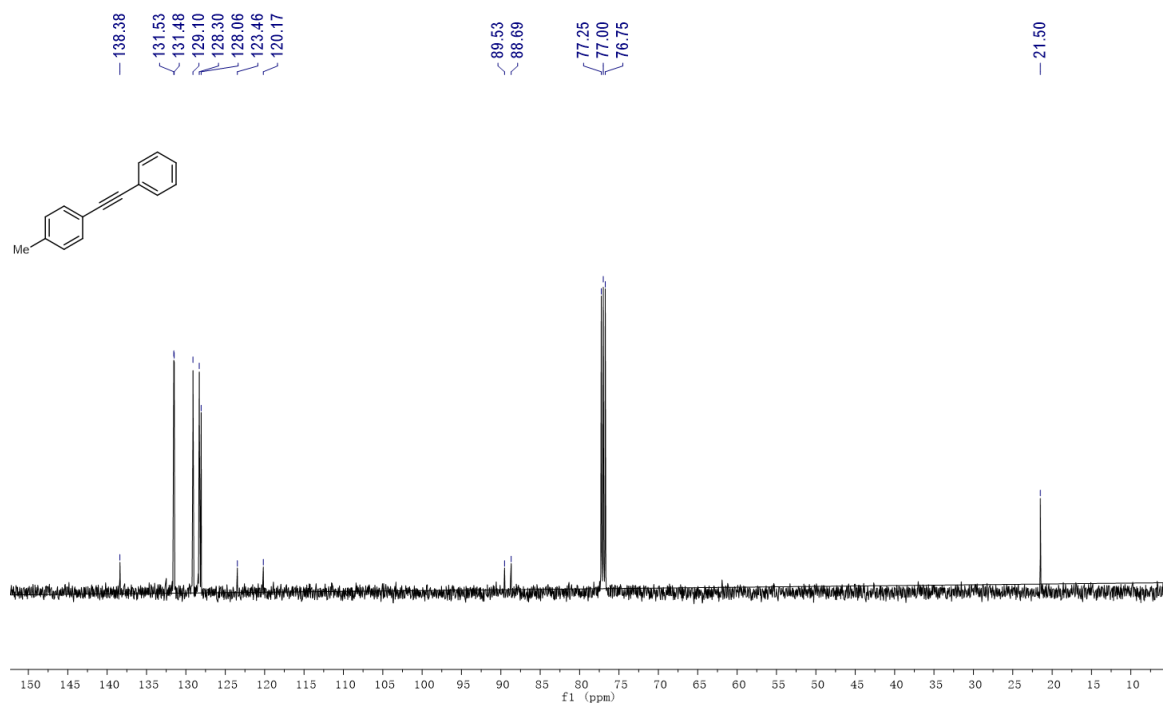

1389

1390

1391 <sup>1</sup>H and <sup>13</sup>C-NMR spectra of product 9c.

1392

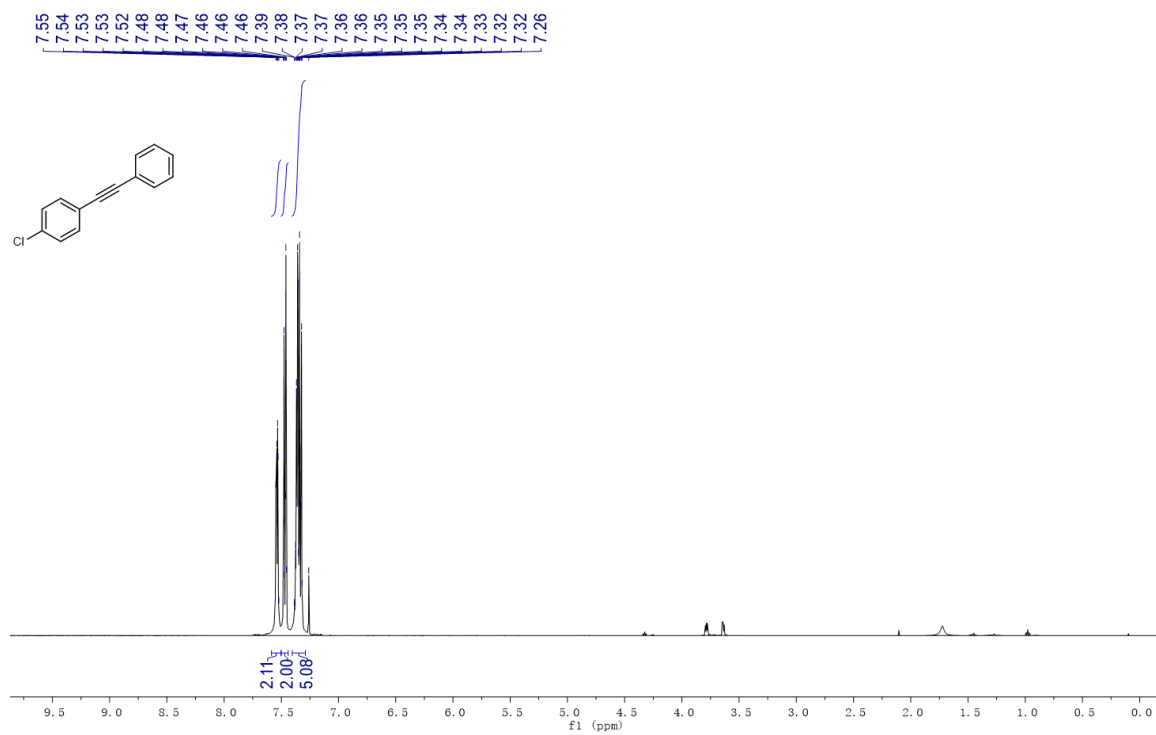

1393

1394

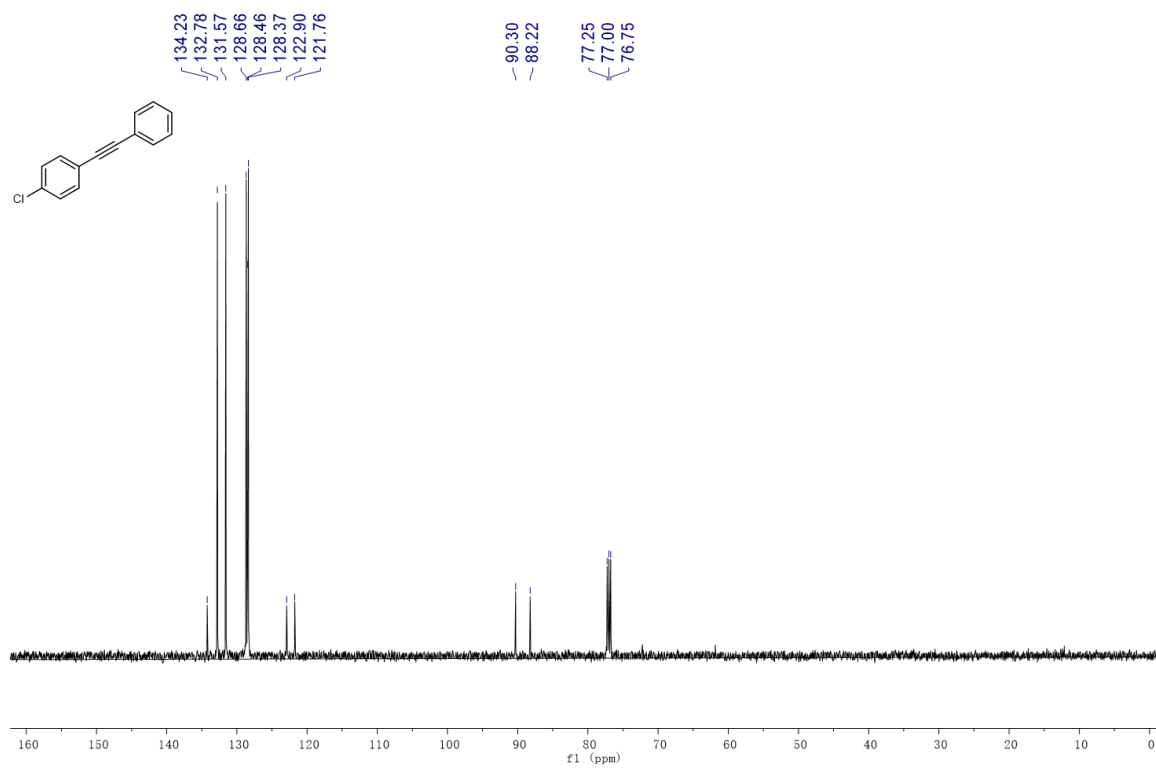

1395

1396

1397 <sup>1</sup>H and <sup>13</sup>C, <sup>19</sup>F-NMR spectra of product 9d.

1398

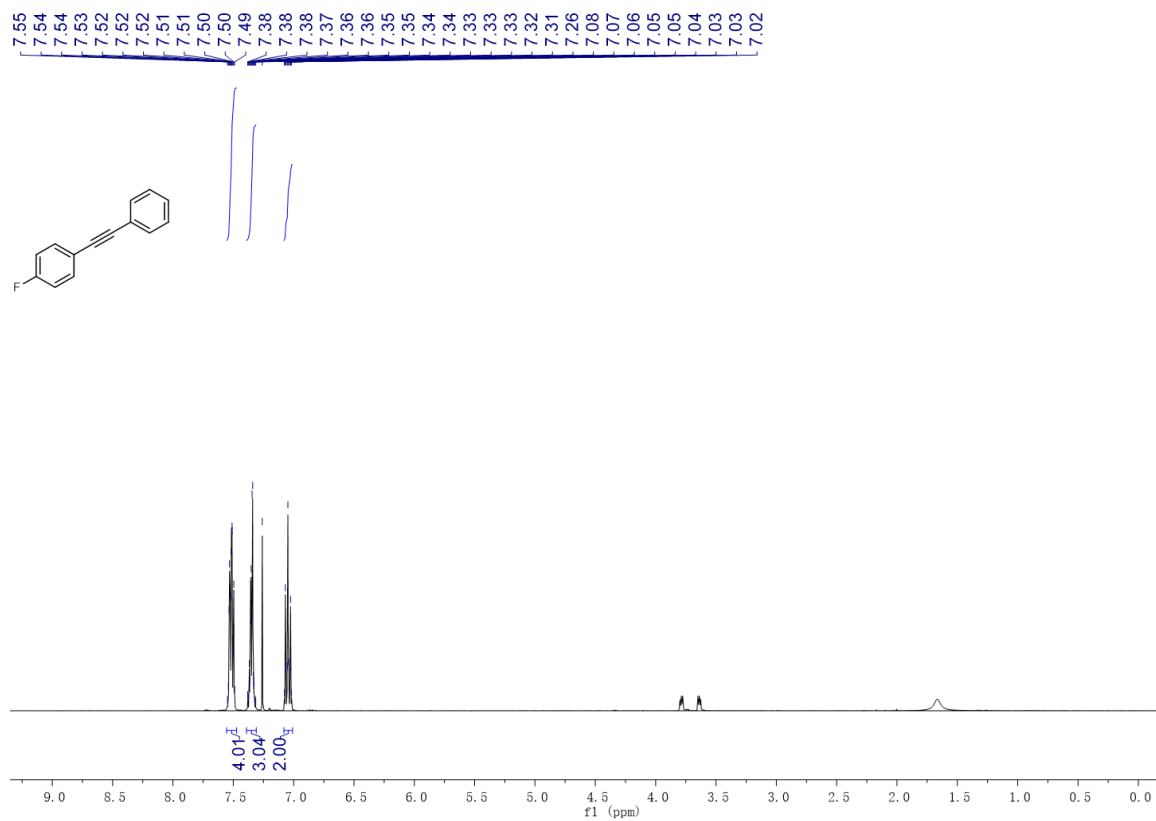

1399

1400

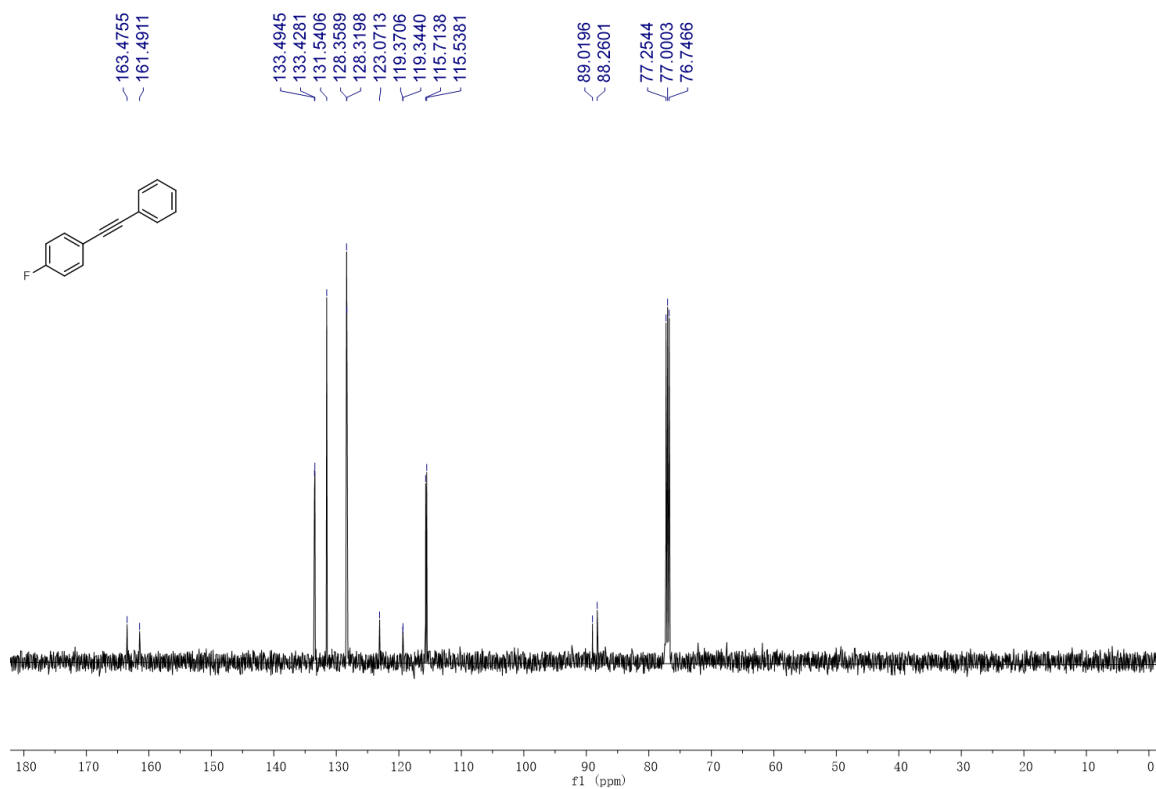

1401



1402

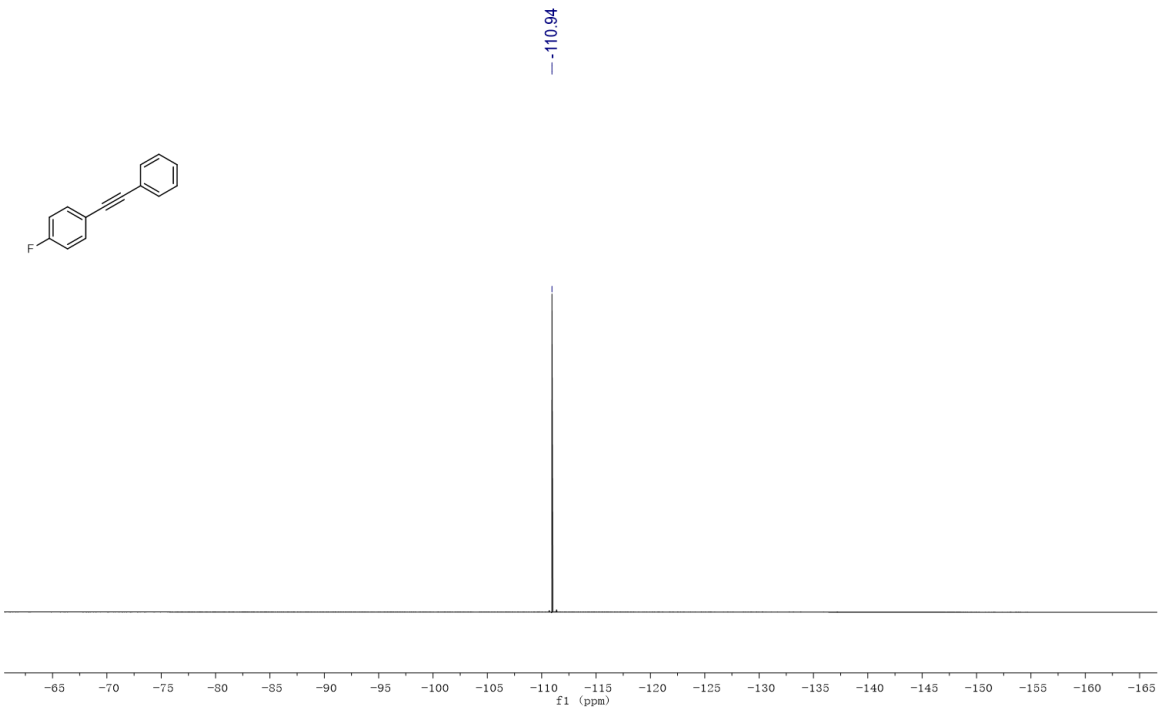

1403

1404 <sup>1</sup>H and <sup>13</sup>C-NMR spectra of product 9e.

1405

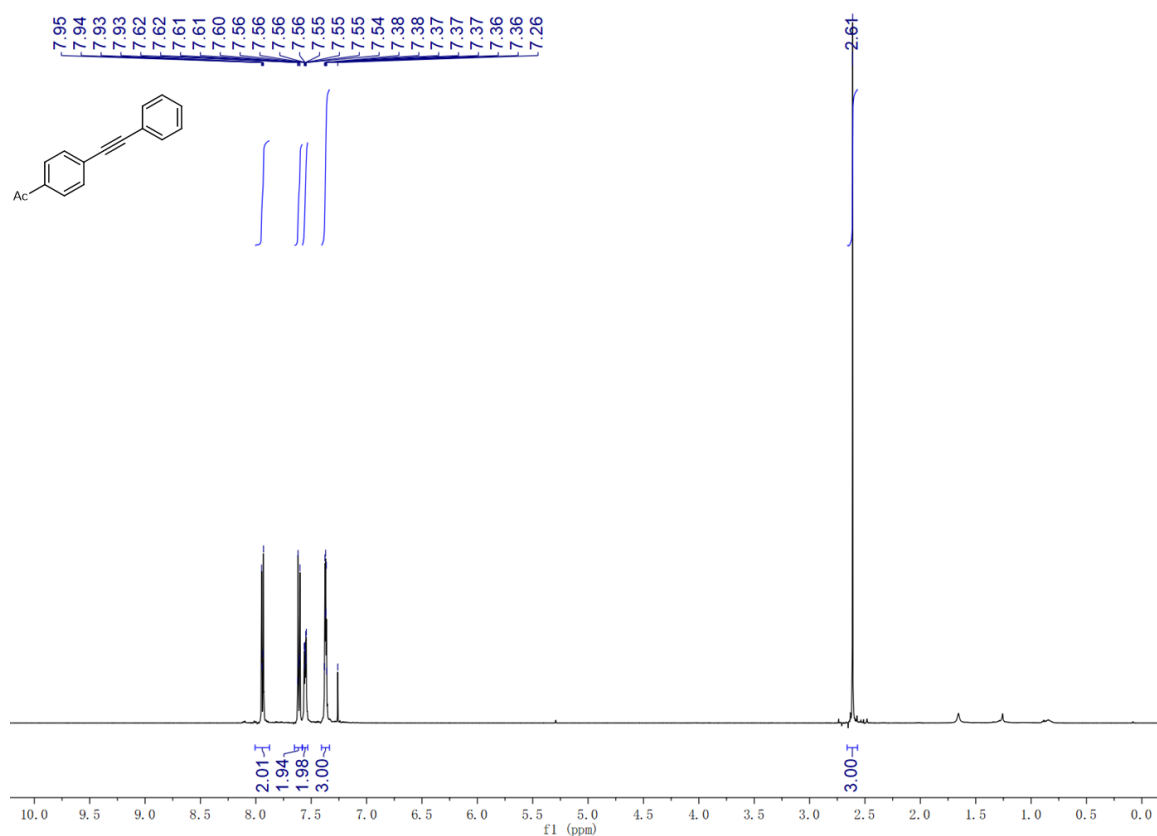

1406

1407

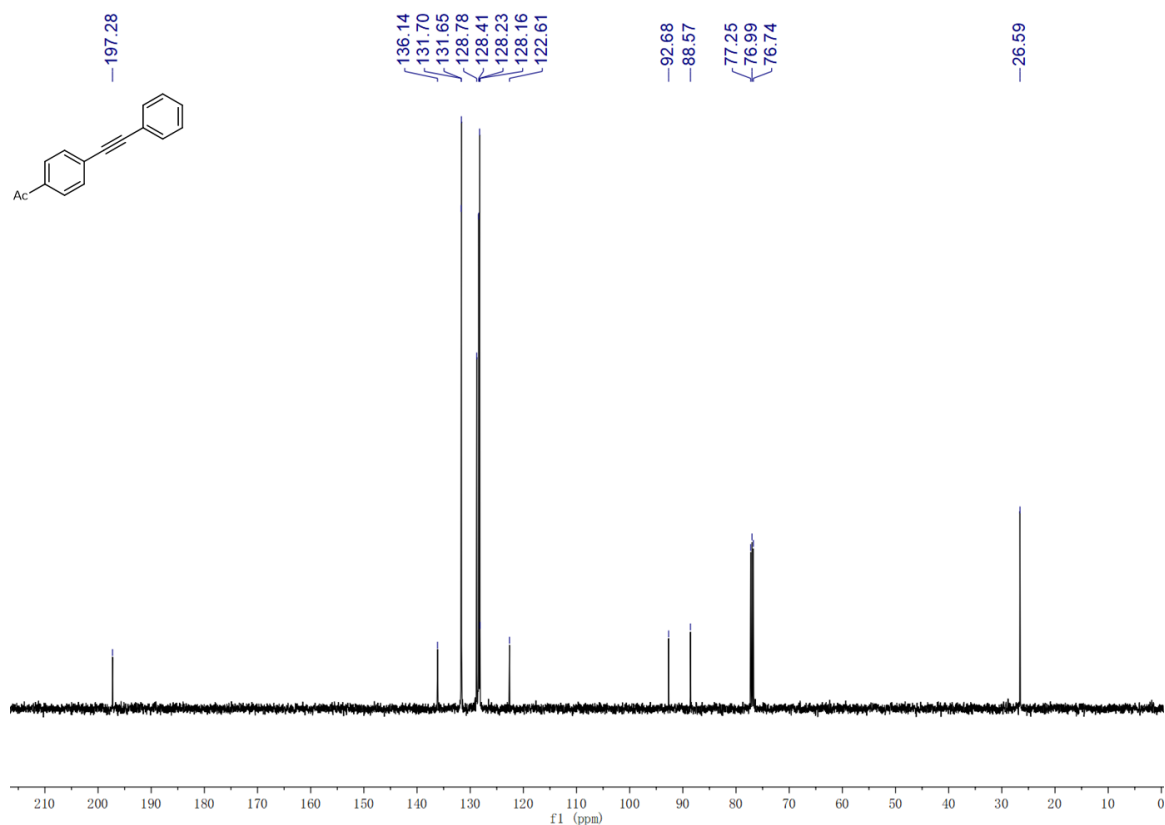

1408

1409 **<sup>1</sup>H and <sup>13</sup>C-NMR spectra of product 9f.**

1410

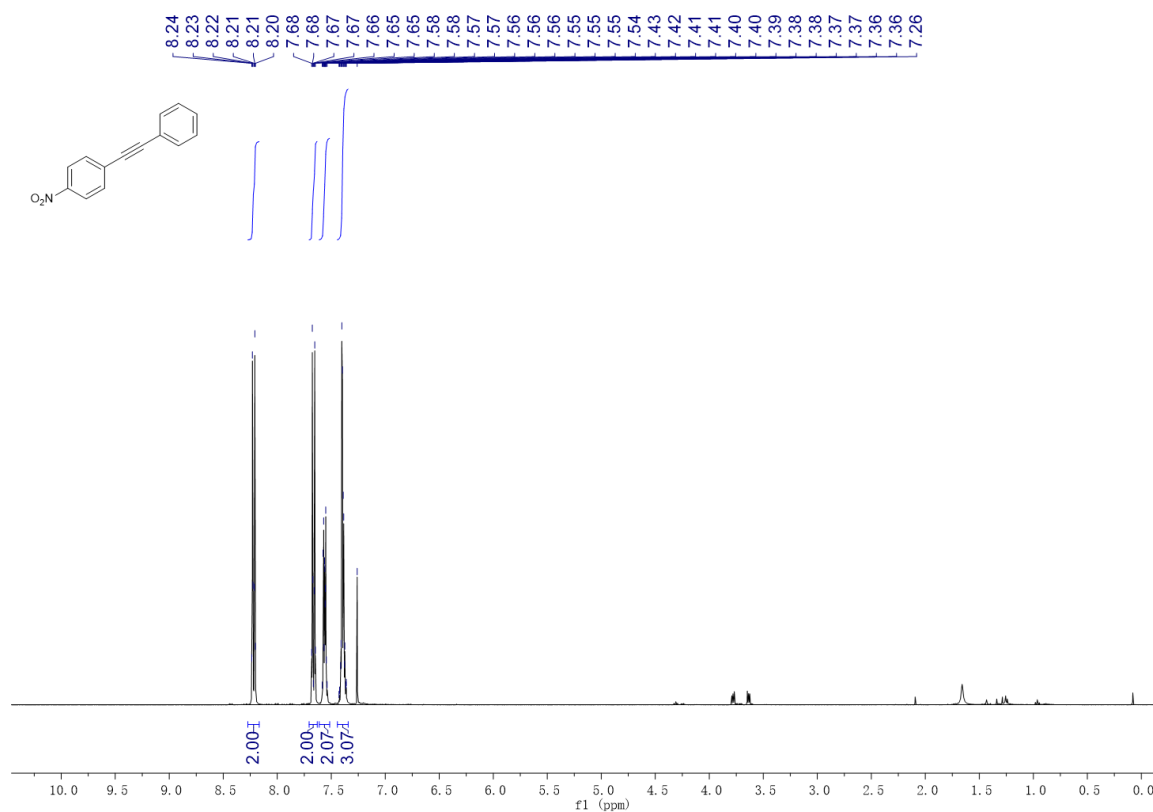

1411

1412

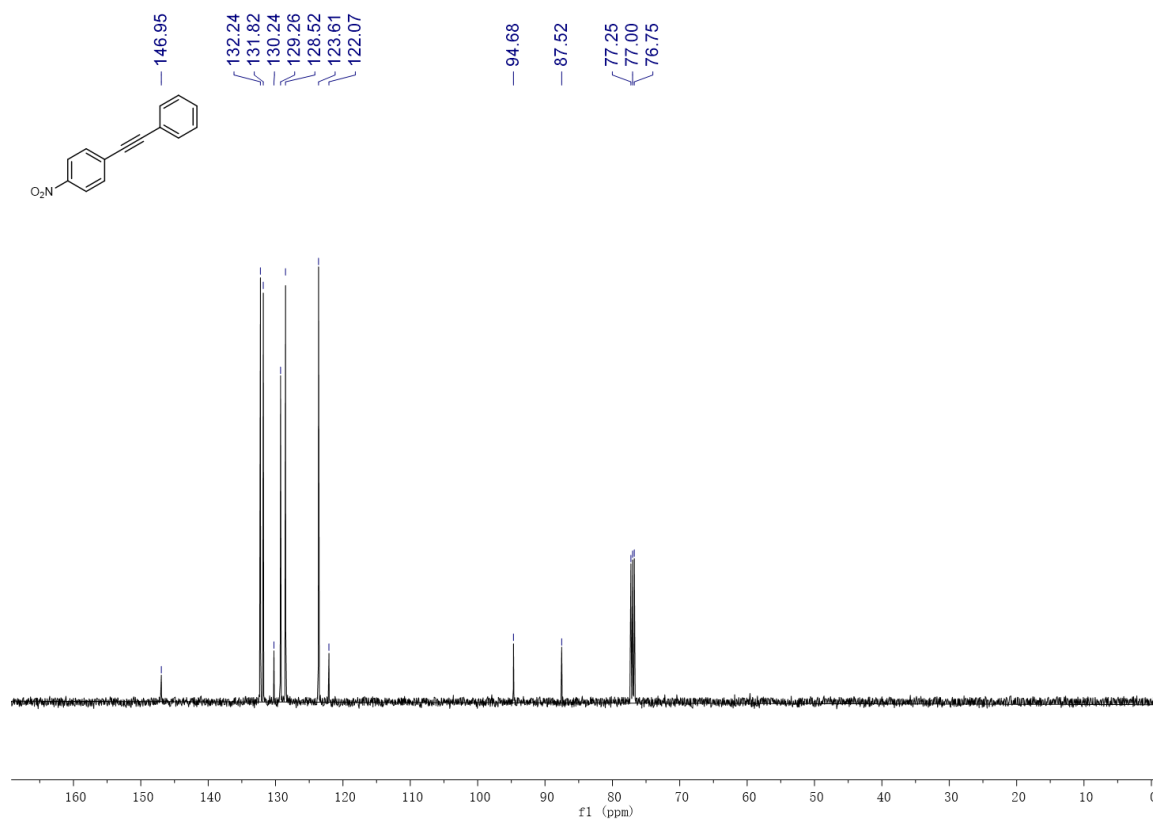

1413

1414 <sup>1</sup>H and <sup>13</sup>C-NMR spectra of product 9g.

1415

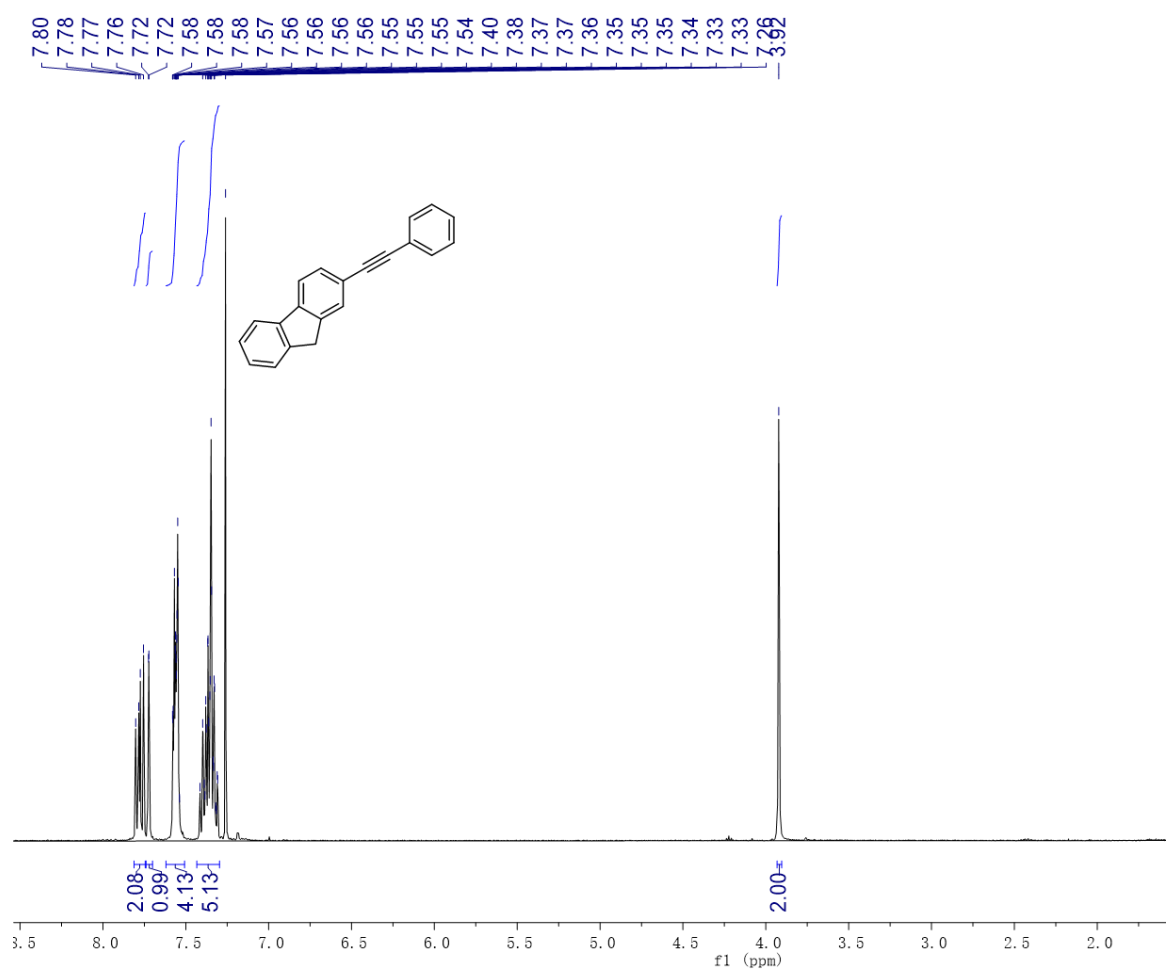

1416

1417

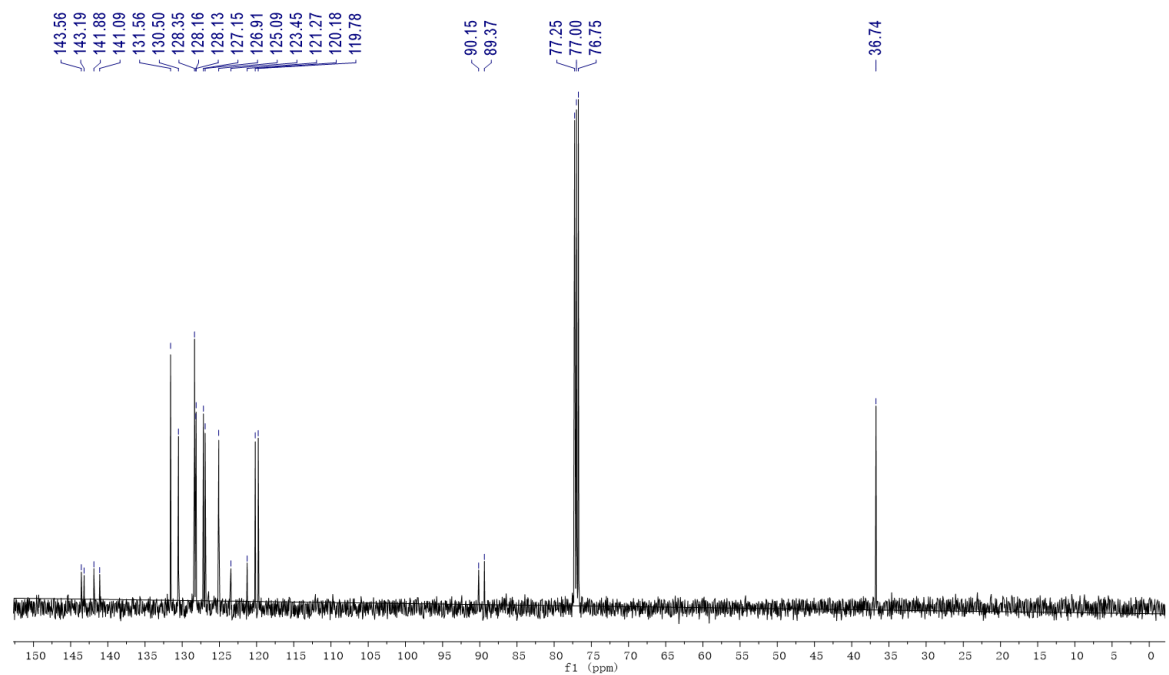

1418

1419 **<sup>1</sup>H and <sup>13</sup>C-NMR spectra of product 9h.**

1420

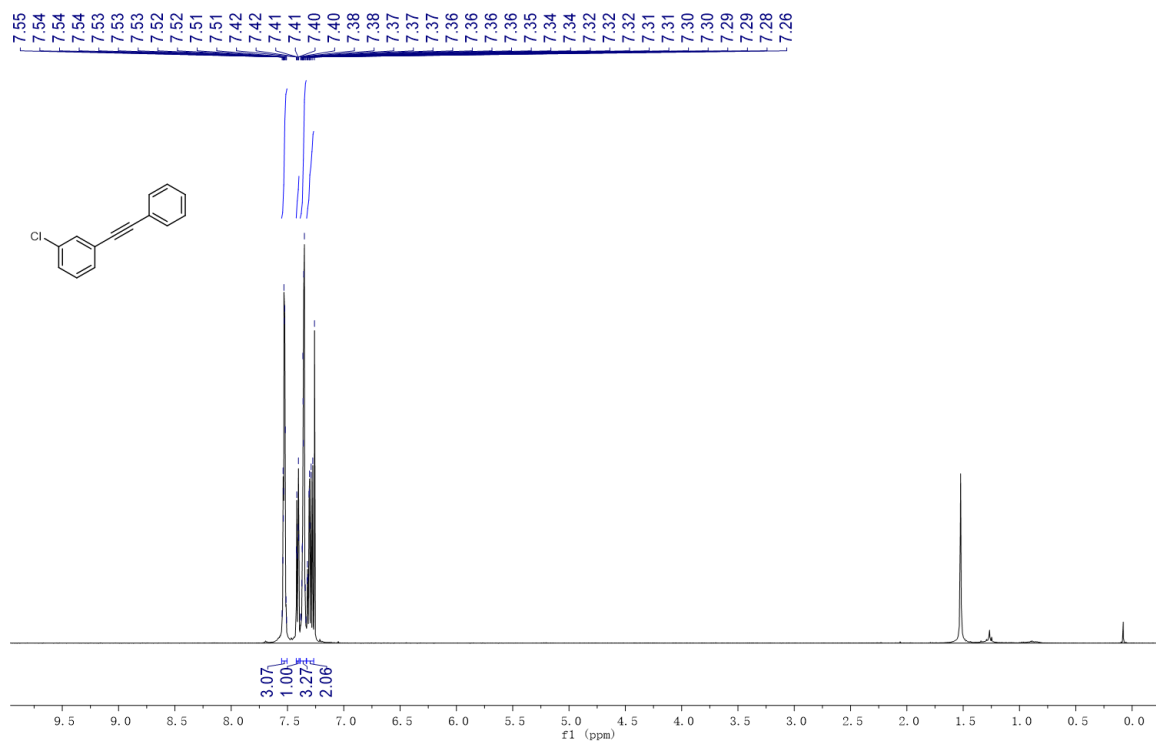

1421

1422

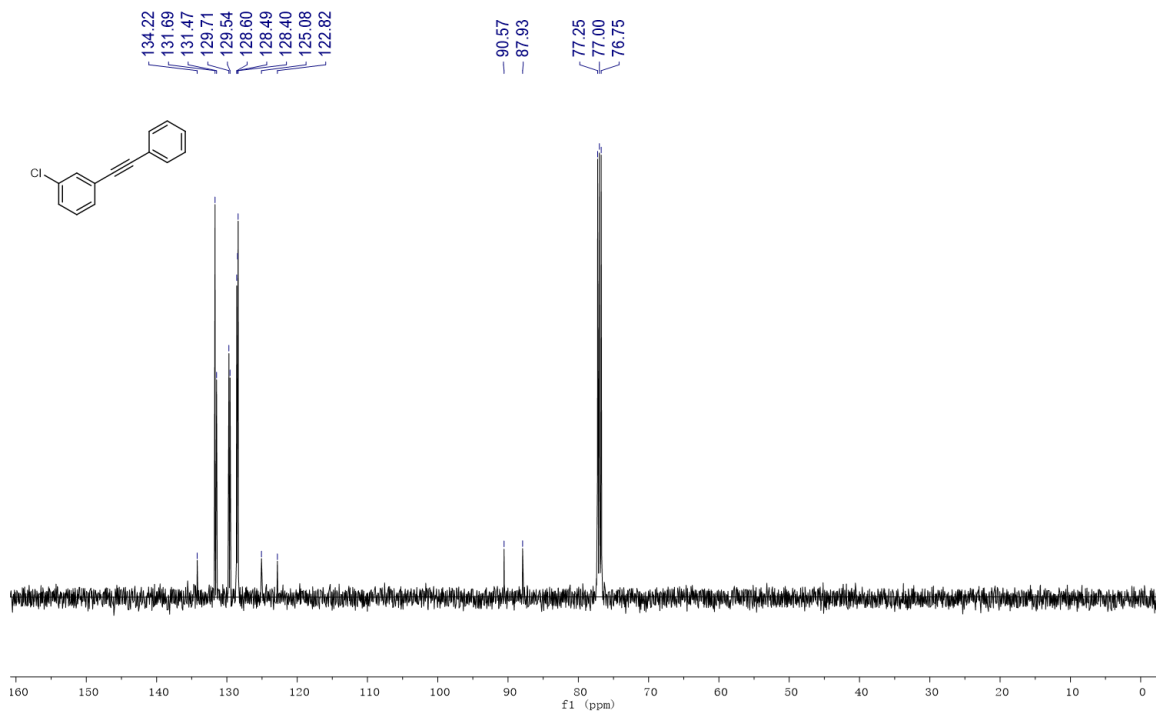

1423

1424

1425 <sup>1</sup>H, <sup>13</sup>C-NMR spectra of product 9i.

1426

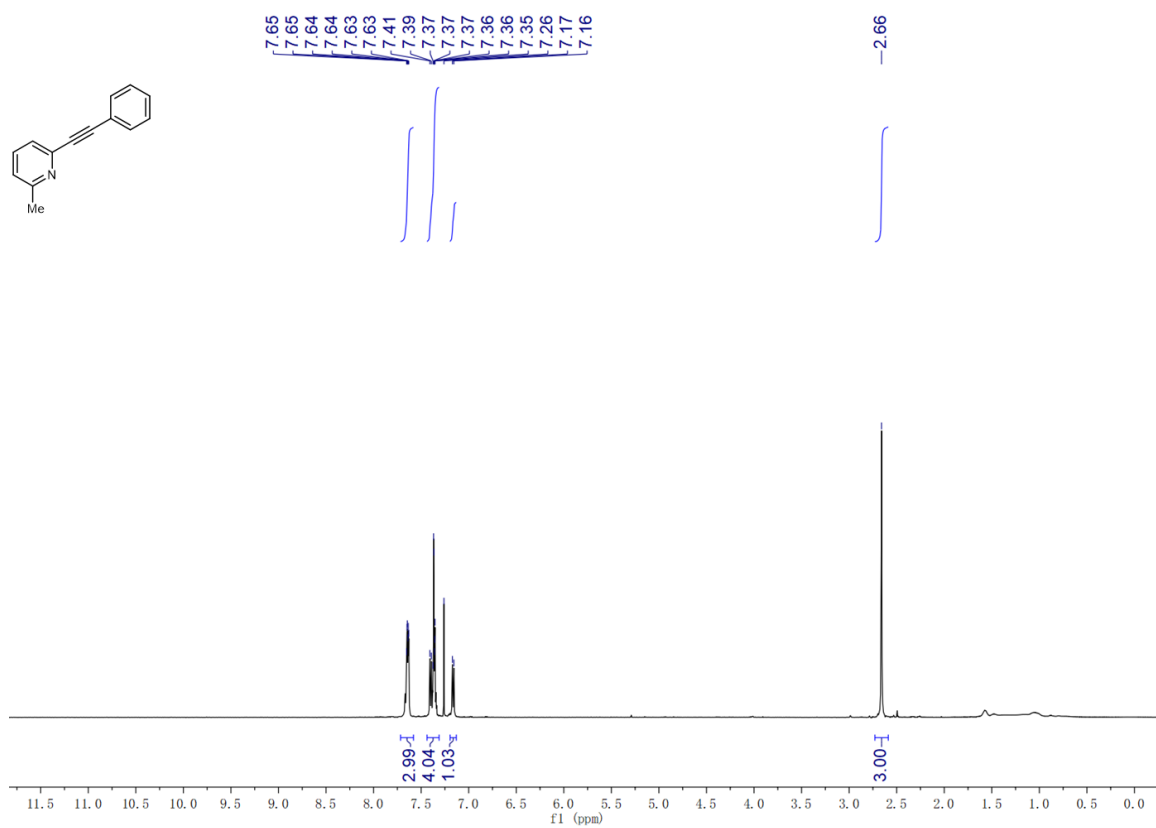

1427

1428

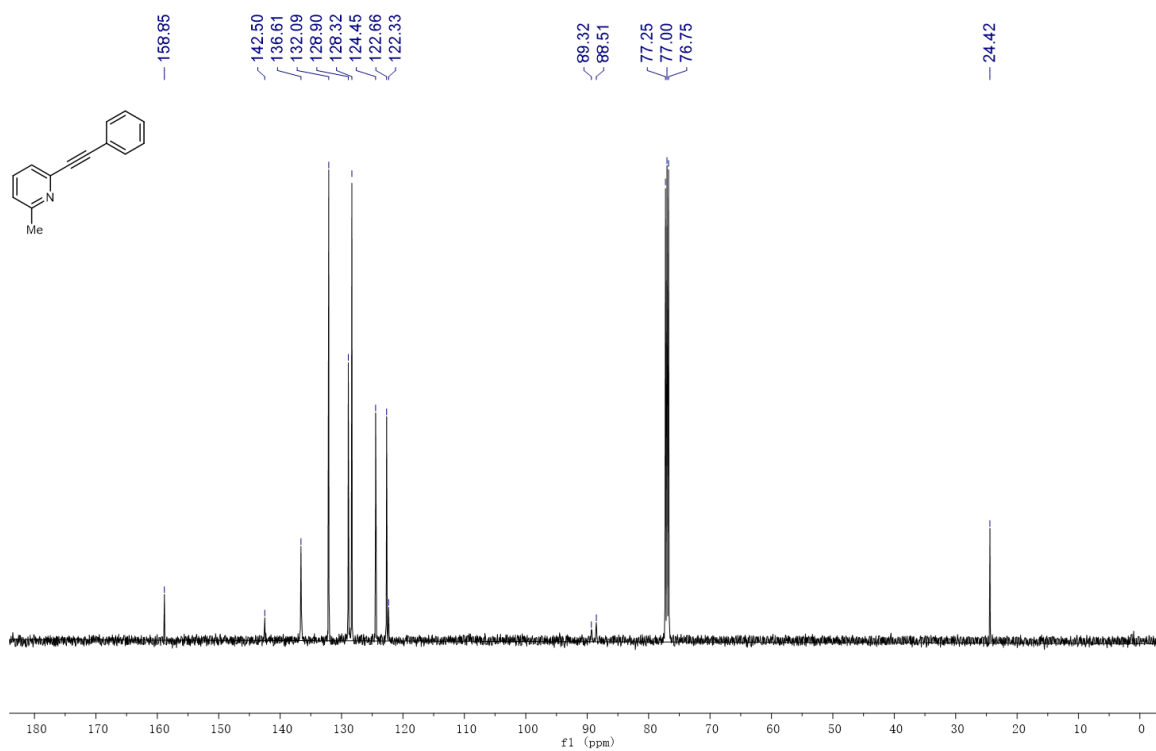

1429

1430
